# Supplementary material for: Altered Cortical Palmitoylation Induces Widespread Molecular Disturbances in Parkinson’s Disease
Source: Int J Mol Sci. 2022 Nov 14;23(22):14018. doi: 10.3390/ijms232214018 (PMC9696982; doi:10.3390/ijms232214018)
Supplement: Supplementary file 1 [file ijms-23-14018-s001.zip]

Archive with 9 entries (9 files):
- Supplemantary Figure S1.pdf
- Supplementary  Table  S1.pdf
- Supplementary Table S2.xlsx
- Supplementary Table S3.xlsx
- Supplementary Table S4.xlsx
- Supplementary Table S5.xlsx
- Supplementary Table S6.xlsx
- Supplementary Table S7.pdf
- Supplementaty Table S8.pdf
