# Supplementary material for: Altered Cortical Palmitoylation Induces Widespread Molecular Disturbances in Parkinson’s Disease
Source: Int J Mol Sci. 2022 Nov 14;23(22):14018. doi: 10.3390/ijms232214018 (PMC9696982; doi:10.3390/ijms232214018)
Supplement: Supplementary file 1 [file ijms-23-14018-s001.zip › Supplementary Table S1.pdf]

| Parkinson's disease patients |      |         |     |             |                    |       |          |                                                                                                                                                      |
|------------------------------|------|---------|-----|-------------|--------------------|-------|----------|------------------------------------------------------------------------------------------------------------------------------------------------------|
| Group                        | Code | Case ID | Age | Braak score | LB Stage           | NIA-R | Dementia | Other Pathological Observations                                                                                                                      |
| Control                      | WT1  | 01-31   | 81  | III         | 0.<br>No LB        | CNM   | no       | Microscopic changes of early or mild AD (insufficient for diagnosis).                                                                                |
|                              | WT4  | 02-24   | 87  | III         | 0.<br>No LB        | CNM   | no       | Mild microscopic changes of AD (insufficient for diagnosis).                                                                                         |
|                              | WT5  | 02-27   | 86  | I           | 0.<br>No LB        | CNM   | no       | Non-specific changes.                                                                                                                                |
|                              | WT7  | 08-40   | 76  | I           | 0.<br>No LB        | CNM   | no       | Normal brain for age.                                                                                                                                |
| Parkinson's disease          | PD9  | 12-22   | 83  | IV          | IV.<br>Neocortical | Low   | yes      | Microscopic changes of AD (insufficient for diagnosis).<br>Cerebral white matter rarefaction.<br>Microscopic focus of cerebellar cortical sclerosis. |
|                              | PD10 | 12-29   | 86  | III         | IV.<br>Neocortical | CNM   | yes      | Non-specific changes.                                                                                                                                |
|                              | PD11 | 12-42   | 69  | II          | IV.<br>Neocortical | Low   | yes      | Microscopic changes of early or mild AD (insufficient for diagnosis).                                                                                |
|                              | PD12 | 98-03   | 72  | I           | IV.<br>Neocortical | CNM   | yes      | Small old cortical infarctions of left cerebral convexity.                                                                                           |

**Supplementary Table S1.** Neurological and pathological characteristics of PD patients and controls included in the study. **Case ID**, subjects listed by year and number, e.g., 01-31 is the 31<sup>st</sup> autopsy done in 2001. **Braak score** is the Braak neurofibrillary stage (0- VI) as originally defined by Braak and Braak, *Acta Neuropathol.* 82:239-59, 1991. **LB stage** is Lewy body stage, defined by Beach *et al.*, *Acta Neuropathol.* 117:613-634, 2009. **NIA-R** (NIA-Reagan) is based on consensus recommendations for postmortem diagnosis of AD (The National Institute on Aging and Reagan Institute Working Group on Diagnostic Criteria for the Neuropathological Assessment of Alzheimer's Disease, *Neurobiol. Aging* 18: S1-S2, 1997). High, intermediate, and low NIA-R refer to the likelihood that dementia, if present, is due to AD histopathology; CNM, criteria not met, refers to cases in which dementia was not present as NIA-Reagan criteria were meant to only be applied to cases with dementia. **Dementia** (clinical history) observed in the patient yes / no. **Other pathological observations** in the clinical history not previously commented. AD: Alzheimer's disease.
