# Supplementary material for: Altered Cortical Palmitoylation Induces Widespread Molecular Disturbances in Parkinson’s Disease
Source: Int J Mol Sci. 2022 Nov 14;23(22):14018. doi: 10.3390/ijms232214018 (PMC9696982; doi:10.3390/ijms232214018)
Supplement: Supplementary file 1 [file ijms-23-14018-s001.zip › Supplementary Table S2.xlsx]

## Sheet: Sheet1
Protein IDs	Fasta headers	iBAQ WF-PD-10	iBAQ WF-PD-11	iBAQ WF-PD-12	iBAQ WF-PD-9	iBAQ WF-WT1	iBAQ WF-WT4	iBAQ WF-WT5	iBAQ WF-WT7	Number of proteins	Peptides WF-PD-10	Peptides WF-PD-11	Peptides WF-PD-12	Peptides WF-PD-9	Peptides WF-WT1	Peptides WF-WT4	Peptides WF-WT5	Peptides WF-WT7	Unique peptides WF-PD-10	Unique peptides WF-PD-11	Unique peptides WF-PD-12	Unique peptides WF-PD-9	Unique peptides WF-WT1	Unique peptides WF-WT4	Unique peptides WF-WT5	Unique peptides WF-WT7	Mol. weight [kDa]	Q-value	Score	Identification type WF-PD-10	Identification type WF-PD-11	Identification type WF-PD-12	Identification type WF-PD-9	Identification type WF-WT1	Identification type WF-WT4	Identification type WF-WT5	Identification type WF-WT7	Sequence coverage WF-PD-10 [%]	Sequence coverage WF-PD-11 [%]	Sequence coverage WF-PD-12 [%]	Sequence coverage WF-PD-9 [%]	Sequence coverage WF-WT1 [%]	Sequence coverage WF-WT4 [%]	Sequence coverage WF-WT5 [%]	Sequence coverage WF-WT7 [%]	Intensity WF-PD-10	Intensity WF-PD-11	Intensity WF-PD-12	Intensity WF-PD-9
tr|A8K9L3|A8K9L3_HUMANProteolipidprotein1(Pelizaeus-Merzbacherdisease,spasticparaplegia2,uncomplicated),isoformCRA_bOS=HomosapiensGN=PLP1PE=2SV=1;sp|P60201|MYPR_HUMANMyelinproteolipidproteinOS=HomosapiensGN=PLP1PE=1SV=2;tr|B4DI30|B4DI30_HUMANcDNAFLJ54051,highlysimilartoMyelinproteolipidproteinOS=HomosapiensPE=2SV=1;tr|B4DI21|B4DI21_HUMANcDNAFLJ54326,highlysimilartoMyelinproteolipidproteinOS=Homos…	tr|A8K9L3|A8K9L3_HUMAN Proteolipid protein 1 (Pelizaeus-Merzbacher disease, spastic paraplegia 2, uncomplicated), isoform CRA_b OS=Homo sapiens GN=PLP1 PE=2 SV=1;sp|P60201|MYPR_HUMAN Myelin proteolipid protein OS=Homo sapiens GN=PLP1 PE=1 SV=2;tr|B4DI30|B4	824190000	1134300000	1497200000	995160000	826160000	1237800000	268280000	257800000	13	14	15	15	14	16	15	14	12	11	12	12	11	13	12	11	10	30.077	0	142.82	By MS/MS	By MS/MS	By MS/MS	By MS/MS	By MS/MS	By MS/MS	By MS/MS	By MS/MS	28.5	33.2	33.2	28.5	33.2	33.2	33.2	33.2	8241900000	11343000000	14972000000	9951600000
tr|B4DPP0|B4DPP0_HUMANcDNAFLJ51032,highlysimilartoCD9antigenOS=HomosapiensPE=2SV=1;tr|A6NNI4|A6NNI4_HUMANTetraspaninOS=HomosapiensGN=CD9PE=1SV=1;tr|G8JLH6|G8JLH6_HUMANTetraspanin(Fragment)OS=HomosapiensGN=CD9PE=1SV=1;sp|P21926|CD9_HUMANCD9antigenOS=HomosapiensGN=CD9PE=1SV=4;tr|F5GXT1|F5GXT1_HUMANCD9antigen(Fragment)OS=HomosapiensGN=CD9PE=1SV=8;tr|Q56CY1|Q56CY1_HUMANTetraspaninOS=HomosapiensGN=BTC…	tr|B4DPP0|B4DPP0_HUMAN cDNA FLJ51032, highly similar to CD9 antigen OS=Homo sapiens PE=2 SV=1;tr|A6NNI4|A6NNI4_HUMAN Tetraspanin OS=Homo sapiens GN=CD9 PE=1 SV=1;tr|G8JLH6|G8JLH6_HUMAN Tetraspanin (Fragment) OS=Homo sapiens GN=CD9 PE=1 SV=1;sp|P21926|CD9_H	598760000	303050000	732650000	670260000	119630000	536190000	222470000	307460000	8	8	8	8	9	7	8	8	8	8	8	8	9	7	8	8	8	15.906	0	74.844	By MS/MS	By MS/MS	By MS/MS	By MS/MS	By MS/MS	By MS/MS	By MS/MS	By MS/MS	46.1	46.1	46.1	46.1	46.1	46.1	46.1	46.1	3592600000	1818300000	4395900000	4021600000
sp|Q16653|MOG_HUMANMyelin-oligodendrocyteglycoproteinOS=HomosapiensGN=MOGPE=1SV=2;tr|Q59EJ6|Q59EJ6_HUMANMyelinoligodendrocyteglycoproteinisoformalpha1variant(Fragment)OS=HomosapiensPE=2SV=1;tr|C9JTE0|C9JTE0_HUMANMyelin-oligodendrocyteglycoproteinOS=HomosapiensGN=MOGPE=1SV=1;tr|Q5SSB8|Q5SSB8_HUMANMyelin-oligodendrocyteglycoproteinOS=HomosapiensGN=MOGPE=1SV=2;tr|A0A0G2JIQ0|A0A0G2JIQ0_HUMANMyelin-ol…	sp|Q16653|MOG_HUMAN Myelin-oligodendrocyte glycoprotein OS=Homo sapiens GN=MOG PE=1 SV=2;tr|Q59EJ6|Q59EJ6_HUMAN Myelin oligodendrocyte glycoprotein isoform alpha1 variant (Fragment) OS=Homo sapiens PE=2 SV=1;tr|C9JTE0|C9JTE0_HUMAN Myelin-oligodendrocyte gl	207560000	147760000	324520000	285810000	42395000	183500000	48419000	98406000	34	19	15	15	19	13	16	15	14	0	0	0	0	0	0	0	0	28.193	0	218.85	By MS/MS	By MS/MS	By MS/MS	By MS/MS	By MS/MS	By MS/MS	By MS/MS	By MS/MS	45.3	42.9	42.9	45.3	40.5	46.6	42.9	40.5	2283200000	1625300000	3569700000	3143900000
sp|P02686-3|MBP_HUMANIsoform3ofMyelinbasicproteinOS=HomosapiensGN=MBP;tr|J3QL64|J3QL64_HUMANMyelinbasicproteinOS=HomosapiensGN=MBPPE=1SV=1;sp|P02686-5|MBP_HUMANIsoform5ofMyelinbasicproteinOS=HomosapiensGN=MBP;tr|A0A024R384|A0A024R384_HUMANMyelinbasicprotein,isoformCRA_aOS=HomosapiensGN=MBPPE=4SV=1;sp|P02686|MBP_HUMANMyelinbasicproteinOS=HomosapiensGN=MBPPE=1SV=3;tr|A8MZH3|A8MZH3_HUMANMyelinbasicp…	sp|P02686-3|MBP_HUMAN Isoform 3 of Myelin basic protein OS=Homo sapiens GN=MBP;tr|J3QL64|J3QL64_HUMAN Myelin basic protein OS=Homo sapiens GN=MBP PE=1 SV=1;sp|P02686-5|MBP_HUMAN Isoform 5 of Myelin basic protein OS=Homo sapiens GN=MBP;tr|A0A024R384|A0A024R	169580000	56326000	148740000	81435000	37013000	89677000	19933000	36115000	27	16	13	12	12	11	12	11	10	2	2	2	2	1	2	2	2	21.493	0	55.014	By MS/MS	By MS/MS	By MS/MS	By MS/MS	By MS/MS	By MS/MS	By MS/MS	By MS/MS	61.4	50.3	45.2	45.2	47.7	47.7	43.7	38.6	2035000000	675910000	1784900000	977220000
tr|Q86YB0|Q86YB0_HUMANGlycoproteinM6AOS=HomosapiensGN=GPM6APE=2SV=1;sp|P51674|GPM6A_HUMANNeuronalmembraneglycoproteinM6-aOS=HomosapiensGN=GPM6APE=1SV=2;sp|P51674-3|GPM6A_HUMANIsoform3ofNeuronalmembraneglycoproteinM6-aOS=HomosapiensGN=GPM6A;sp|P51674-2|GPM6A_HUMANIsoform2ofNeuronalmembraneglycoproteinM6-aOS=HomosapiensGN=GPM6A;tr|Q49AH3|Q49AH3_HUMANGPM6AproteinOS=HomosapiensGN=GPM6APE=2SV=1;tr|D6R…	tr|Q86YB0|Q86YB0_HUMAN Glycoprotein M6A OS=Homo sapiens GN=GPM6A PE=2 SV=1;sp|P51674|GPM6A_HUMAN Neuronal membrane glycoprotein M6-a OS=Homo sapiens GN=GPM6A PE=1 SV=2;sp|P51674-3|GPM6A_HUMAN Isoform 3 of Neuronal membrane glycoprotein M6-a OS=Homo sapiens	144810000	633270000	397260000	464360000	90390000	719830000	249100000	115820000	14	13	14	15	13	15	15	15	15	12	13	14	12	14	14	14	14	31.209	0	320.08	By MS/MS	By MS/MS	By MS/MS	By MS/MS	By MS/MS	By MS/MS	By MS/MS	By MS/MS	33.1	31.7	34.2	33.1	34.2	34.2	34.2	34.2	1303300000	5699400000	3575300000	4179200000
tr|B3KT06|B3KT06_HUMANTubulinalphachainOS=HomosapiensPE=2SV=1;sp|P68363|TBA1B_HUMANTubulinalpha-1BchainOS=HomosapiensGN=TUBA1BPE=1SV=1;tr|A8JZY9|A8JZY9_HUMANTubulinalphachainOS=HomosapiensPE=2SV=1;tr|B3KPS3|B3KPS3_HUMANTubulinalphachainOS=HomosapiensPE=2SV=1;sp|P68363-2|TBA1B_HUMANIsoform2ofTubulinalpha-1BchainOS=HomosapiensGN=TUBA1B;tr|B4DDU2|B4DDU2_HUMANcDNAFLJ60097,highlysimilartoTubulinalpha-…	tr|B3KT06|B3KT06_HUMAN Tubulin alpha chain OS=Homo sapiens PE=2 SV=1;sp|P68363|TBA1B_HUMAN Tubulin alpha-1B chain OS=Homo sapiens GN=TUBA1B PE=1 SV=1;tr|A8JZY9|A8JZY9_HUMAN Tubulin alpha chain OS=Homo sapiens PE=2 SV=1;tr|B3KPS3|B3KPS3_HUMAN Tubulin alpha	107920000	74125000	107570000	176710000	19385000	209020000	42480000	97098000	21	29	24	24	28	19	25	25	24	0	0	0	0	0	0	0	0	46.341	0	275.71	By MS/MS	By MS/MS	By MS/MS	By MS/MS	By MS/MS	By MS/MS	By MS/MS	By MS/MS	72.6	61.8	61.8	67.3	53.1	68.3	63.7	63.7	2374200000	1630800000	2366600000	3887700000
tr|E9PJK1|E9PJK1_HUMANTetraspaninOS=HomosapiensGN=CD81PE=1SV=1;tr|E9PRJ8|E9PRJ8_HUMANTetraspanin(Fragment)OS=HomosapiensGN=CD81PE=1SV=1;tr|H0YDL9|H0YDL9_HUMANTetraspanin(Fragment)OS=HomosapiensGN=CD81PE=1SV=1;tr|H0YDJ9|H0YDJ9_HUMANTetraspanin(Fragment)OS=HomosapiensGN=CD81PE=1SV=1;tr|A0A024RCB7|A0A024RCB7_HUMANTetraspaninOS=HomosapiensGN=CD81PE=3SV=1;sp|P60033|CD81_HUMANCD81antigenOS=HomosapiensG…	tr|E9PJK1|E9PJK1_HUMAN Tetraspanin OS=Homo sapiens GN=CD81 PE=1 SV=1;tr|E9PRJ8|E9PRJ8_HUMAN Tetraspanin (Fragment) OS=Homo sapiens GN=CD81 PE=1 SV=1;tr|H0YDL9|H0YDL9_HUMAN Tetraspanin (Fragment) OS=Homo sapiens GN=CD81 PE=1 SV=1;tr|H0YDJ9|H0YDJ9_HUMAN Tetr	98352000	160330000	183900000	193680000	54019000	162660000	46356000	65900000	11	8	6	7	8	5	7	7	5	8	6	7	8	5	7	7	5	17.963	0	87.98	By MS/MS	By MS/MS	By MS/MS	By MS/MS	By MS/MS	By MS/MS	By MS/MS	By MS/MS	48.5	46.1	48.5	48.5	44.2	48.5	48.5	44.2	491760000	801640000	919490000	968380000
sp|P09543|CN37_HUMAN2',3'-cyclic-nucleotide3'-phosphodiesteraseOS=HomosapiensGN=CNPPE=1SV=2;tr|B4DI06|B4DI06_HUMANcDNAFLJ52954,highlysimilarto2',3'-cyclic-nucleotide3'-phosphodiesterase(EC3.1.4.37)OS=HomosapiensPE=2SV=1;tr|K7ERC4|K7ERC4_HUMAN2',3'-cyclic-nucleotide3'-phosphodiesterase(Fragment)OS=HomosapiensGN=CNPPE=1SV=8	sp|P09543|CN37_HUMAN 2,3-cyclic-nucleotide 3-phosphodiesterase OS=Homo sapiens GN=CNP PE=1 SV=2;tr|B4DI06|B4DI06_HUMAN cDNA FLJ52954, highly similar to 2,3-cyclic-nucleotide 3-phosphodiesterase(EC 3.1.4.37) OS=Homo sapiens PE=2 SV=1	89146000	37939000	153990000	96492000	23453000	50055000	14793000	36926000	3	42	34	36	40	35	35	31	31	1	1	1	1	2	1	1	1	47.578	0	275.48	By MS/MS	By MS/MS	By MS/MS	By MS/MS	By MS/MS	By MS/MS	By MS/MS	By MS/MS	70.8	51.5	54.2	69.1	58.9	58.7	53.7	53.2	2407000000	1024400000	4157800000	2605300000
tr|A0A1C7CYX9|A0A1C7CYX9_HUMANDihydropyrimidinase-relatedprotein2OS=HomosapiensGN=DPYSL2PE=1SV=1;tr|Q59GB4|Q59GB4_HUMANDihydropyrimidinase-like2variant(Fragment)OS=HomosapiensPE=2SV=1;sp|Q16555|DPYL2_HUMANDihydropyrimidinase-relatedprotein2OS=HomosapiensGN=DPYSL2PE=1SV=1;sp|Q16555-2|DPYL2_HUMANIsoform2ofDihydropyrimidinase-relatedprotein2OS=HomosapiensGN=DPYSL2;tr|Q53ET2|Q53ET2_HUMANDihydropyrimi…	tr|A0A1C7CYX9|A0A1C7CYX9_HUMAN Dihydropyrimidinase-related protein 2 OS=Homo sapiens GN=DPYSL2 PE=1 SV=1;tr|Q59GB4|Q59GB4_HUMAN Dihydropyrimidinase-like 2 variant (Fragment) OS=Homo sapiens PE=2 SV=1;sp|Q16555|DPYL2_HUMAN Dihydropyrimidinase-related protei	42387000	17215000	42603000	65521000	4888300	62800000	27969000	36657000	10	41	35	35	41	28	36	38	35	37	31	31	37	24	32	34	31	73.502	0	280.79	By MS/MS	By MS/MS	By MS/MS	By MS/MS	By MS/MS	By MS/MS	By MS/MS	By MS/MS	68.5	63.7	64	67.9	57.6	64.7	66.9	64.4	1653100000	671400000	1661500000	2555300000
tr|V9HVZ4|V9HVZ4_HUMANGlyceraldehyde-3-phosphatedehydrogenaseOS=HomosapiensGN=HEL-S-162ePPE=2SV=1;sp|P04406|G3P_HUMANGlyceraldehyde-3-phosphatedehydrogenaseOS=HomosapiensGN=GAPDHPE=1SV=3;sp|P04406-2|G3P_HUMANIsoform2ofGlyceraldehyde-3-phosphatedehydrogenaseOS=HomosapiensGN=GAPDH;tr|Q2TSD0|Q2TSD0_HUMANGlyceraldehyde-3-phosphatedehydrogenaseOS=HomosapiensPE=2SV=1;tr|E7EUT5|E7EUT5_HUMANGlyceraldehyd…	tr|V9HVZ4|V9HVZ4_HUMAN Glyceraldehyde-3-phosphate dehydrogenase OS=Homo sapiens GN=HEL-S-162eP PE=2 SV=1;sp|P04406|G3P_HUMAN Glyceraldehyde-3-phosphate dehydrogenase OS=Homo sapiens GN=GAPDH PE=1 SV=3;sp|P04406-2|G3P_HUMAN Isoform 2 of Glyceraldehyde-3-pho	41798000	40202000	54429000	79844000	19208000	148020000	23430000	14146000	12	26	23	23	26	17	24	18	14	26	23	23	26	17	24	18	14	36.053	0	235.15	By MS/MS	By MS/MS	By MS/MS	By MS/MS	By MS/MS	By MS/MS	By MS/MS	By MS/MS	71.9	60	63.6	71.9	60.6	74.6	58.8	54.9	710560000	683430000	925300000	1357300000
sp|P63261|ACTG_HUMANActin,cytoplasmic2OS=HomosapiensGN=ACTG1PE=1SV=1;tr|B4E3A4|B4E3A4_HUMANcDNAFLJ57283,highlysimilartoActin,cytoplasmic2OS=HomosapiensPE=2SV=1;tr|B4DVQ0|B4DVQ0_HUMANcDNAFLJ58286,highlysimilartoActin,cytoplasmic2OS=HomosapiensPE=2SV=1;tr|I3L3I0|I3L3I0_HUMANActin,cytoplasmic2(Fragment)OS=HomosapiensGN=ACTG1PE=1SV=1;tr|I3L1U9|I3L1U9_HUMANActin,cytoplasmic2(Fragment)OS=HomosapiensGN=…	sp|P63261|ACTG_HUMAN Actin, cytoplasmic 2 OS=Homo sapiens GN=ACTG1 PE=1 SV=1;tr|B4E3A4|B4E3A4_HUMAN cDNA FLJ57283, highly similar to Actin, cytoplasmic 2 OS=Homo sapiens PE=2 SV=1;tr|B4DVQ0|B4DVQ0_HUMAN cDNA FLJ58286, highly similar to Actin, cytoplasmic 2	37826000	47427000	49776000	54416000	11255000	49781000	42135000	69832000	9	24	22	21	24	19	22	23	21	1	1	1	1	1	1	1	1	41.792	0	173.99	By MS/MS	By MS/MS	By MS/MS	By MS/MS	By MS/MS	By MS/MS	By MS/MS	By MS/MS	72.3	68.8	70.7	72.3	56.8	68.5	68.8	67.2	756520000	948530000	995530000	1088300000
tr|B2R6K4|B2R6K4_HUMANcDNA,FLJ92996,highlysimilartoHomosapiensguaninenucleotidebindingprotein(Gprotein),betapolypeptide1(GNB1),mRNAOS=HomosapiensPE=2SV=1;tr|A0A024R056|A0A024R056_HUMANGuaninenucleotidebindingprotein(Gprotein),betapolypeptide1,isoformCRA_aOS=HomosapiensGN=GNB1PE=2SV=1;sp|P62873|GBB1_HUMANGuaninenucleotide-bindingproteinG(I)/G(S)/G(T)subunitbeta-1OS=HomosapiensGN=GNB1PE=1SV=3;sp|P6…	tr|B2R6K4|B2R6K4_HUMAN cDNA, FLJ92996, highly similar to Homo sapiens guanine nucleotide binding protein (G protein), beta polypeptide 1 (GNB1), mRNA OS=Homo sapiens PE=2 SV=1;tr|A0A024R056|A0A024R056_HUMAN Guanine nucleotide binding protein (G protein), b	34808000	42272000	45990000	73372000	10957000	80732000	18756000	13667000	11	19	16	17	19	16	18	16	13	12	10	10	12	10	12	11	9	37.301	0	162.78	By MS/MS	By MS/MS	By MS/MS	By MS/MS	By MS/MS	By MS/MS	By MS/MS	By MS/MS	68.5	62.4	62.4	68.5	55.6	68.5	65.6	44.1	452510000	549540000	597870000	953830000
sp|P61266-2|STX1B_HUMANIsoform2ofSyntaxin-1BOS=HomosapiensGN=STX1B;sp|P61266|STX1B_HUMANSyntaxin-1BOS=HomosapiensGN=STX1BPE=1SV=1	sp|P61266-2|STX1B_HUMAN Isoform 2 of Syntaxin-1B OS=Homo sapiens GN=STX1B;sp|P61266|STX1B_HUMAN Syntaxin-1B OS=Homo sapiens GN=STX1B PE=1 SV=1	34278000	52507000	56066000	109730000	13446000	116660000	51294000	26085000	2	22	22	22	24	20	22	23	20	21	21	21	23	19	21	22	19	31.786	0	316.85	By MS/MS	By MS/MS	By MS/MS	By MS/MS	By MS/MS	By MS/MS	By MS/MS	By MS/MS	64.6	59.2	57	64.6	57	59.2	59.2	52.7	548450000	840110000	897050000	1755700000
tr|A0A142CHG9|A0A142CHG9_HUMANGO2-qchimericG-proteinOS=HomosapiensPE=2SV=1;sp|P09471-2|GNAO_HUMANIsoformAlpha-2ofGuaninenucleotide-bindingproteinG(o)subunitalphaOS=HomosapiensGN=GNAO1;tr|Q6AWC5|Q6AWC5_HUMANUncharacterizedproteinDKFZp686O0962(Fragment)OS=HomosapiensGN=DKFZp686O0962PE=2SV=1	tr|A0A142CHG9|A0A142CHG9_HUMAN GO2-q chimeric G-protein OS=Homo sapiens PE=2 SV=1;sp|P09471-2|GNAO_HUMAN Isoform Alpha-2 of Guanine nucleotide-binding protein G(o) subunit alpha OS=Homo sapiens GN=GNAO1	32481000	119600000	53270000	62595000	15714000	76701000	21261000	30791000	3	24	21	19	25	17	21	17	16	0	0	0	0	0	0	0	0	40.238	0	227.26	By MS/MS	By MS/MS	By MS/MS	By MS/MS	By MS/MS	By MS/MS	By MS/MS	By MS/MS	59	53.7	52.8	59	50.3	53.7	52.3	47.5	649630000	2391900000	1065400000	1251900000
sp|P60880|SNP25_HUMANSynaptosomal-associatedprotein25OS=HomosapiensGN=SNAP25PE=1SV=1;tr|A0A0A0MSS0|A0A0A0MSS0_HUMANSynaptosomal-associatedprotein25(Fragment)OS=HomosapiensGN=SNAP25PE=1SV=1	sp|P60880|SNP25_HUMAN Synaptosomal-associated protein 25 OS=Homo sapiens GN=SNAP25 PE=1 SV=1;tr|A0A0A0MSS0|A0A0A0MSS0_HUMAN Synaptosomal-associated protein 25 (Fragment) OS=Homo sapiens GN=SNAP25 PE=1 SV=1	27159000	44466000	39550000	73803000	11614000	92908000	43235000	42351000	2	19	17	16	19	16	18	17	18	4	3	3	4	3	3	3	4	23.315	0	253.8	By MS/MS	By MS/MS	By MS/MS	By MS/MS	By MS/MS	By MS/MS	By MS/MS	By MS/MS	73.8	73.8	70.9	74.3	73.8	74.3	73.8	77.2	353060000	578060000	514150000	959440000
tr|J3QS39|J3QS39_HUMANPolyubiquitin-B(Fragment)OS=HomosapiensGN=UBBPE=1SV=1;tr|J3QTR3|J3QTR3_HUMANUbiquitin-40SribosomalproteinS27a(Fragment)OS=HomosapiensGN=RPS27APE=1SV=1;tr|F5H6Q2|F5H6Q2_HUMANPolyubiquitin-C(Fragment)OS=HomosapiensGN=UBCPE=1SV=8;tr|Q3MIH3|Q3MIH3_HUMANUbiquitinA-52residueribosomalproteinfusionproduct1OS=HomosapiensGN=UBA52PE=2SV=1;sp|P62987|RL40_HUMANUbiquitin-60Sribosomalprote…	tr|J3QS39|J3QS39_HUMAN Polyubiquitin-B (Fragment) OS=Homo sapiens GN=UBB PE=1 SV=1;tr|J3QTR3|J3QTR3_HUMAN Ubiquitin-40S ribosomal protein S27a (Fragment) OS=Homo sapiens GN=RPS27A PE=1 SV=1;tr|F5H6Q2|F5H6Q2_HUMAN Polyubiquitin-C (Fragment) OS=Homo sapiens	25148000	17597000	21636000	24504000	3598400	14351000	6752400	7681100	41	6	5	5	6	4	4	4	4	6	5	5	6	4	4	4	4	10.469	0	28.732	By MS/MS	By MS/MS	By MS/MS	By MS/MS	By MS/MS	By MS/MS	By MS/MS	By MS/MS	52.7	52.7	52.7	52.7	50.5	50.5	50.5	50.5	125740000	87985000	108180000	122520000
sp|Q13885|TBB2A_HUMANTubulinbeta-2AchainOS=HomosapiensGN=TUBB2APE=1SV=1;tr|B2R6L0|B2R6L0_HUMANTubulinbetachainOS=HomosapiensPE=2SV=1;tr|A0A024QZU2|A0A024QZU2_HUMANTubulinbetachainOS=HomosapiensGN=TUBB2BPE=3SV=1;tr|O43209|O43209_HUMANTubulinbetachain(Fragment)OS=HomosapiensPE=2SV=1;tr|Q9UGA2|Q9UGA2_HUMANTubulinbetachain(Fragment)OS=HomosapiensGN=DKFZp566F223PE=2SV=1;tr|B7Z4N1|B7Z4N1_HUMANcDNAFLJ53…	sp|Q13885|TBB2A_HUMAN Tubulin beta-2A chain OS=Homo sapiens GN=TUBB2A PE=1 SV=1;tr|B2R6L0|B2R6L0_HUMAN Tubulin beta chain OS=Homo sapiens PE=2 SV=1;tr|A0A024QZU2|A0A024QZU2_HUMAN Tubulin beta chain OS=Homo sapiens GN=TUBB2B PE=3 SV=1;tr|O43209|O43209_HUMAN	24914000	25400000	33825000	54884000	14286000	115890000	57946000	77497000	10	28	22	23	29	19	28	27	21	2	2	2	3	1	2	2	1	49.906	0	214	By MS/MS	By MS/MS	By MS/MS	By MS/MS	By MS/MS	By MS/MS	By MS/MS	By MS/MS	71.5	53.5	53.7	80.2	49.2	71.5	70.8	52.6	498270000	508010000	676490000	1097700000
tr|A0A024R5Z9|A0A024R5Z9_HUMANPyruvatekinaseOS=HomosapiensGN=PKM2PE=3SV=1;sp|P14618-2|KPYM_HUMANIsoformM1ofPyruvatekinasePKMOS=HomosapiensGN=PKM;tr|H3BTN5|H3BTN5_HUMANPyruvatekinase(Fragment)OS=HomosapiensGN=PKMPE=1SV=1;tr|B4DRT3|B4DRT3_HUMANPyruvatekinaseOS=HomosapiensPE=2SV=1;tr|Q504U3|Q504U3_HUMANPyruvatekinaseOS=HomosapiensGN=PKM2PE=2SV=1;tr|H3BR70|H3BR70_HUMANPyruvatekinaseOS=HomosapiensGN=P…	tr|A0A024R5Z9|A0A024R5Z9_HUMAN Pyruvate kinase OS=Homo sapiens GN=PKM2 PE=3 SV=1;sp|P14618-2|KPYM_HUMAN Isoform M1 of Pyruvate kinase PKM OS=Homo sapiens GN=PKM;tr|H3BTN5|H3BTN5_HUMAN Pyruvate kinase (Fragment) OS=Homo sapiens GN=PKM PE=1 SV=1;tr|B4DRT3|B4	23965000	27126000	40048000	41919000	13994000	60973000	12418000	13923000	6	44	42	42	42	33	42	35	32	5	5	4	5	2	5	3	2	58.061	0	323.31	By MS/MS	By MS/MS	By MS/MS	By MS/MS	By MS/MS	By MS/MS	By MS/MS	By MS/MS	74.8	76.1	66.1	74.8	55.6	67.8	59.1	54.4	814790000	922270000	1361600000	1425200000
sp|Q969P0|IGSF8_HUMANImmunoglobulinsuperfamilymember8OS=HomosapiensGN=IGSF8PE=1SV=1;sp|Q969P0-3|IGSF8_HUMANIsoform3ofImmunoglobulinsuperfamilymember8OS=HomosapiensGN=IGSF8;tr|C9J8Z4|C9J8Z4_HUMANImmunoglobulinsuperfamilymember8(Fragment)OS=HomosapiensGN=IGSF8PE=1SV=1;sp|Q969P0-2|IGSF8_HUMANIsoform2ofImmunoglobulinsuperfamilymember8OS=HomosapiensGN=IGSF8;tr|Q8NF83|Q8NF83_HUMANFLJ00271protein(Fragme…	sp|Q969P0|IGSF8_HUMAN Immunoglobulin superfamily member 8 OS=Homo sapiens GN=IGSF8 PE=1 SV=1;sp|Q969P0-3|IGSF8_HUMAN Isoform 3 of Immunoglobulin superfamily member 8 OS=Homo sapiens GN=IGSF8;tr|C9J8Z4|C9J8Z4_HUMAN Immunoglobulin superfamily member 8 (Fragm	23933000	36349000	47190000	60699000	7256600	70958000	6836900	5308600	5	24	21	21	24	17	24	17	16	24	21	21	24	17	24	17	16	65.033	0	125.76	By MS/MS	By MS/MS	By MS/MS	By MS/MS	By MS/MS	By MS/MS	By MS/MS	By MS/MS	57.7	40.5	40.5	51.9	33.9	57.6	36.4	32.5	694050000	1054100000	1368500000	1760300000
tr|B4DY28|B4DY28_HUMANcDNAFLJ61189,highlysimilartoCysteineandglycine-richprotein1OS=HomosapiensPE=2SV=1;sp|P21291|CSRP1_HUMANCysteineandglycine-richprotein1OS=HomosapiensGN=CSRP1PE=1SV=3;tr|Q9BTA4|Q9BTA4_HUMANEpididymissecretoryproteinLi286(Fragment)OS=HomosapiensGN=HEL-S-286PE=2SV=1;tr|Q6ZMS3|Q6ZMS3_HUMANcDNAFLJ16726fis,cloneUTERU3014791OS=HomosapiensPE=2SV=1;tr|B4E2T4|B4E2T4_HUMANcDNAFLJ54121,h…	tr|B4DY28|B4DY28_HUMAN cDNA FLJ61189, highly similar to Cysteine and glycine-rich protein 1 OS=Homo sapiens PE=2 SV=1;sp|P21291|CSRP1_HUMAN Cysteine and glycine-rich protein 1 OS=Homo sapiens GN=CSRP1 PE=1 SV=3;tr|Q9BTA4|Q9BTA4_HUMAN Epididymis secretory p	20353000	15151000	26618000	17800000	2920200	13510000	2362000	2192000	11	12	12	12	11	9	9	8	7	3	3	3	3	2	3	3	2	20.042	0	53.821	By MS/MS	By MS/MS	By MS/MS	By MS/MS	By MS/MS	By MS/MS	By MS/MS	By MS/MS	69.5	69.5	69.5	69.5	57.8	61.5	57.2	48.1	244240000	181810000	319420000	213600000
tr|H3BN27|H3BN27_HUMANPlasmolipinOS=HomosapiensGN=PLLPPE=1SV=1;tr|A8K0N4|A8K0N4_HUMANcDNAFLJ78169,highlysimilartoHomosapienstransmembrane4superfamilymember11(TM4SF11),mRNAOS=HomosapiensPE=2SV=1;tr|A0A024R6T3|A0A024R6T3_HUMANPlasmamembraneproteolipid(Plasmolipin),isoformCRA_aOS=HomosapiensGN=PLLPPE=4SV=1;sp|Q9Y342|PLLP_HUMANPlasmolipinOS=HomosapiensGN=PLLPPE=1SV=1;tr|A0A087WYE0|A0A087WYE0_HUMANPla…	tr|H3BN27|H3BN27_HUMAN Plasmolipin OS=Homo sapiens GN=PLLP PE=1 SV=1;tr|A8K0N4|A8K0N4_HUMAN cDNA FLJ78169, highly similar to Homo sapiens transmembrane 4 superfamily member 11 (TM4SF11), mRNA OS=Homo sapiens PE=2 SV=1;tr|A0A024R6T3|A0A024R6T3_HUMAN Plasma	20255000	6008500	13672000	27481000	1870200	13286000	1282000	166870	5	3	3	3	3	3	3	2	2	3	3	3	3	3	3	2	2	13.105	0	8.7629	By MS/MS	By MS/MS	By MS/MS	By MS/MS	By MS/MS	By MS/MS	By MS/MS	By MS/MS	39.5	39.5	39.5	39.5	39.5	39.5	31.5	31.5	101280000	30042000	68358000	137410000
sp|Q13875-4|MOBP_HUMANIsoform4ofMyelin-associatedoligodendrocytebasicproteinOS=HomosapiensGN=MOBP;tr|A0A024R2P3|A0A024R2P3_HUMANMyelin-associatedoligodendrocytebasicproteinisoform2OS=HomosapiensGN=MOBPPE=2SV=1;sp|Q13875-2|MOBP_HUMANIsoform2ofMyelin-associatedoligodendrocytebasicproteinOS=HomosapiensGN=MOBP;tr|A0A024R2N4|A0A024R2N4_HUMANMyelin-associatedoligodendrocytebasicprotein,isoformCRA_bOS=H…	sp|Q13875-4|MOBP_HUMAN Isoform 4 of Myelin-associated oligodendrocyte basic protein OS=Homo sapiens GN=MOBP;tr|A0A024R2P3|A0A024R2P3_HUMAN Myelin-associated oligodendrocyte basic protein isoform 2 OS=Homo sapiens GN=MOBP PE=2 SV=1;sp|Q13875-2|MOBP_HUMAN Is	19489000	11895000	18087000	13830000	6609900	9193800	2095700	6022300	9	6	3	3	4	3	4	3	3	6	3	3	4	3	4	3	3	23.381	0	19.142	By MS/MS	By MS/MS	By MS/MS	By MS/MS	By MS/MS	By MS/MS	By MS/MS	By MS/MS	28.2	11.2	11.2	20.4	11.2	20.4	11.2	11.2	97447000	59477000	90437000	69150000
tr|H6VRG2|H6VRG2_HUMANKeratin1OS=HomosapiensGN=KRT1PE=3SV=1	tr|H6VRG2|H6VRG2_HUMAN Keratin 1 OS=Homo sapiens GN=KRT1 PE=3 SV=1	18870000	54128000	28392000	24871000	7799200	20181000	26298000	29526000	1	39	38	38	37	27	36	39	35	0	0	0	0	0	0	0	0	66.065	0	287.08	By MS/MS	By MS/MS	By MS/MS	By MS/MS	By MS/MS	By MS/MS	By MS/MS	By MS/MS	54.5	51.4	52.8	53.9	45.5	52.3	54	52.2	584980000	1678000000	880160000	771010000
tr|Q5U058|Q5U058_HUMANGrowthassociatedprotein43OS=HomosapiensGN=GAP43PE=2SV=1;sp|P17677|NEUM_HUMANNeuromodulinOS=HomosapiensGN=GAP43PE=1SV=1;sp|P17677-2|NEUM_HUMANIsoform2ofNeuromodulinOS=HomosapiensGN=GAP43	tr|Q5U058|Q5U058_HUMAN Growth associated protein 43 OS=Homo sapiens GN=GAP43 PE=2 SV=1;sp|P17677|NEUM_HUMAN Neuromodulin OS=Homo sapiens GN=GAP43 PE=1 SV=1;sp|P17677-2|NEUM_HUMAN Isoform 2 of Neuromodulin OS=Homo sapiens GN=GAP43	18664000	48516000	34457000	37643000	3773500	31081000	13144000	39129000	3	16	18	17	16	15	17	16	18	16	18	17	16	15	17	16	18	24.802	0	215.91	By MS/MS	By MS/MS	By MS/MS	By MS/MS	By MS/MS	By MS/MS	By MS/MS	By MS/MS	79.4	79.4	79.4	79.4	79.4	84	79.4	79.4	223970000	582200000	413480000	451710000
tr|U6A216|U6A216_HUMANMutanthemoglobinalpha1globinchain(Fragment)OS=HomosapiensGN=HBA1PE=3SV=1;tr|E9M4D4|E9M4D4_HUMANHemoglobinalpha-1globinchain(Fragment)OS=HomosapiensGN=HBA1PE=3SV=1;tr|D1MGQ2|D1MGQ2_HUMANAlpha-2globinchainOS=HomosapiensGN=HBA2PE=3SV=1;sp|P69905|HBA_HUMANHemoglobinsubunitalphaOS=HomosapiensGN=HBA1PE=1SV=2;tr|A0A1S5UZ39|A0A1S5UZ39_HUMANHemoglobinsubunitalphaOS=HomosapiensGN=HBA2…	tr|U6A216|U6A216_HUMAN Mutant hemoglobin alpha 1 globin chain (Fragment) OS=Homo sapiens GN=HBA1 PE=3 SV=1;tr|E9M4D4|E9M4D4_HUMAN Hemoglobin alpha-1 globin chain (Fragment) OS=Homo sapiens GN=HBA1 PE=3 SV=1;tr|D1MGQ2|D1MGQ2_HUMAN Alpha-2 globin chain OS=Ho	18417000	7574100	5190000	22539000	841440	14150000	3072000	2826600	22	6	5	5	6	5	6	6	6	2	2	2	2	2	2	2	2	10.753	0	13.139	By MS/MS	By MS/MS	By MS/MS	By MS/MS	By MS/MS	By MS/MS	By MS/MS	By MS/MS	89	60	60	89	60	89	89	89	110500000	45445000	31140000	135230000
tr|V9HWH2|V9HWH2_HUMANCreatinekinasebrainisoform1OS=HomosapiensGN=HEL-S-29PE=1SV=1;tr|V9HW77|V9HW77_HUMANEpididymisluminalprotein211OS=HomosapiensGN=HEL-211PE=2SV=1;sp|P12277|KCRB_HUMANCreatinekinaseB-typeOS=HomosapiensGN=CKBPE=1SV=1;tr|A0A0S2Z471|A0A0S2Z471_HUMANCreatinekinasebrainisoform2(Fragment)OS=HomosapiensGN=CKBPE=2SV=1;tr|B4DP56|B4DP56_HUMANcDNAFLJ52237,highlysimilartoCreatinekinaseB-typ…	tr|V9HWH2|V9HWH2_HUMAN Creatine kinase brain isoform 1 OS=Homo sapiens GN=HEL-S-29 PE=1 SV=1;tr|V9HW77|V9HW77_HUMAN Epididymis luminal protein 211 OS=Homo sapiens GN=HEL-211 PE=2 SV=1;sp|P12277|KCRB_HUMAN Creatine kinase B-type OS=Homo sapiens GN=CKB PE=1	18101000	20751000	14867000	28109000	5063800	31352000	6002500	7493300	10	18	13	12	19	12	14	13	13	18	13	12	19	12	14	13	13	42.644	0	164.93	By MS/MS	By MS/MS	By MS/MS	By MS/MS	By MS/MS	By MS/MS	By MS/MS	By MS/MS	59.1	41.5	38.3	64.6	37.8	49.9	40.7	40.7	307710000	352760000	252740000	477850000
sp|P04350|TBB4A_HUMANTubulinbeta-4AchainOS=HomosapiensGN=TUBB4APE=1SV=2;tr|B4DE77|B4DE77_HUMANTubulinbetachainOS=HomosapiensPE=2SV=1;tr|B4DJ43|B4DJ43_HUMANcDNAFLJ53341,highlysimilartoTubulinbeta-4chainOS=HomosapiensPE=2SV=1;tr|B4DFH6|B4DFH6_HUMANcDNAFLJ52536,highlysimilartoTubulinbeta-4chainOS=HomosapiensPE=2SV=1;tr|M0R278|M0R278_HUMANTubulinbeta-4Achain(Fragment)OS=HomosapiensGN=TUBB4APE=1SV=1;t…	sp|P04350|TBB4A_HUMAN Tubulin beta-4A chain OS=Homo sapiens GN=TUBB4A PE=1 SV=2;tr|B4DE77|B4DE77_HUMAN Tubulin beta chain OS=Homo sapiens PE=2 SV=1;tr|B4DJ43|B4DJ43_HUMAN cDNA FLJ53341, highly similar to Tubulin beta-4 chain OS=Homo sapiens PE=2 SV=1;tr|B4	18048000	11284000	12193000	25776000	4795300	57265000	20588000	48922000	14	28	25	25	29	21	28	27	25	5	5	5	6	5	5	5	5	49.585	0	323.31	By MS/MS	By MS/MS	By MS/MS	By MS/MS	By MS/MS	By MS/MS	By MS/MS	By MS/MS	68.2	66	66	70	54.1	68.7	68	61.7	360950000	225670000	243860000	515520000
tr|A0A024R525|A0A024R525_HUMANFerritinOS=HomosapiensGN=FTH1PE=3SV=1;sp|P02794|FRIH_HUMANFerritinheavychainOS=HomosapiensGN=FTH1PE=1SV=2;tr|Q6NZ44|Q6NZ44_HUMANFerritinOS=HomosapiensGN=FTH1PE=1SV=1;tr|B3KXC3|B3KXC3_HUMANFerritinOS=HomosapiensPE=2SV=1;tr|Q6NS36|Q6NS36_HUMANFerritin(Fragment)OS=HomosapiensGN=FTH1PE=2SV=1;tr|G3V192|G3V192_HUMANFerritinOS=HomosapiensGN=FTH1PE=1SV=1;tr|G3V1D1|G3V1D1_HUM…	tr|A0A024R525|A0A024R525_HUMAN Ferritin OS=Homo sapiens GN=FTH1 PE=3 SV=1;sp|P02794|FRIH_HUMAN Ferritin heavy chain OS=Homo sapiens GN=FTH1 PE=1 SV=2;tr|Q6NZ44|Q6NZ44_HUMAN Ferritin OS=Homo sapiens GN=FTH1 PE=1 SV=1;tr|B3KXC3|B3KXC3_HUMAN Ferritin OS=Homo	18022000	5043000	17722000	17028000	4178100	11162000	11148000	33092000	16	13	8	8	13	5	10	9	10	13	8	8	13	5	10	9	10	21.225	0	45.285	By MS/MS	By MS/MS	By MS/MS	By MS/MS	By MS/MS	By MS/MS	By MS/MS	By MS/MS	73.8	29.5	35	73.8	27.3	55.2	54.6	62.8	198250000	55473000	194950000	187310000
sp|O75508|CLD11_HUMANClaudin-11OS=HomosapiensGN=CLDN11PE=1SV=2;tr|B4DFI2|B4DFI2_HUMANClaudinOS=HomosapiensGN=CLDN11PE=1SV=1;tr|B4DFG7|B4DFG7_HUMANcDNAFLJ59862,highlysimilartoClaudin-11OS=HomosapiensPE=2SV=1	sp|O75508|CLD11_HUMAN Claudin-11 OS=Homo sapiens GN=CLDN11 PE=1 SV=2;tr|B4DFI2|B4DFI2_HUMAN Claudin OS=Homo sapiens GN=CLDN11 PE=1 SV=1	17963000	28453000	40724000	47908000	11691000	29772000	5493900	3423900	3	3	1	2	3	2	3	1	1	3	1	2	3	2	3	1	1	21.993	0	20.191	By MS/MS	By MS/MS	By MS/MS	By MS/MS	By MS/MS	By MS/MS	By MS/MS	By MS/MS	22.2	6.8	14.5	22.2	14.5	22.2	6.8	6.8	125740000	199170000	285070000	335360000
tr|H0YD13|H0YD13_HUMANCD44antigenOS=HomosapiensGN=CD44PE=1SV=2;tr|B4DN59|B4DN59_HUMANcDNAFLJ52702,highlysimilartoHomosapiensCD44antigen(homingfunctionandIndianbloodgroupsystem)(CD44),transcriptvariant4,mRNAOS=HomosapiensPE=2SV=1;sp|P16070-18|CD44_HUMANIsoform18ofCD44antigenOS=HomosapiensGN=CD44;tr|A8K309|A8K309_HUMANcDNAFLJ76654,highlysimilartoHomosapiensCD44antigen(homingfunctionandIndianbloodgr…	tr|H0YD13|H0YD13_HUMAN CD44 antigen OS=Homo sapiens GN=CD44 PE=1 SV=2;tr|B4DN59|B4DN59_HUMAN cDNA FLJ52702, highly similar to Homo sapiens CD44 antigen (homing function and Indian blood group system) (CD44), transcript variant 4, mRNA OS=Homo sapiens PE=2	17230000	454520	2751800	3389500	220550	1420500	1102300	1388300	34	9	7	7	7	4	6	6	6	9	7	7	7	4	6	6	6	22.683	0	40.52	By MS/MS	By MS/MS	By MS/MS	By MS/MS	By MS/MS	By MS/MS	By MS/MS	By MS/MS	38.3	34.5	34.5	34.5	23.8	34	34	34	223990000	5908800	35774000	44063000
sp|P62745|RHOB_HUMANRho-relatedGTP-bindingproteinRhoBOS=HomosapiensGN=RHOBPE=1SV=1;tr|B4DMJ8|B4DMJ8_HUMANcDNAFLJ52116,highlysimilartoRho-relatedGTP-bindingproteinRhoBOS=HomosapiensPE=2SV=1	sp|P62745|RHOB_HUMAN Rho-related GTP-binding protein RhoB OS=Homo sapiens GN=RHOB PE=1 SV=1;tr|B4DMJ8|B4DMJ8_HUMAN cDNA FLJ52116, highly similar to Rho-related GTP-binding protein RhoB OS=Homo sapiens PE=2 SV=1	17191000	41833000	37115000	24921000	9100800	36658000	9035900	31130000	2	12	12	12	12	9	10	11	11	10	10	10	10	8	9	9	9	22.123	0	54.672	By MS/MS	By MS/MS	By MS/MS	By MS/MS	By MS/MS	By MS/MS	By MS/MS	By MS/MS	61.2	61.2	61.2	61.2	36.7	56.1	50	50	154710000	376500000	334040000	224290000
tr|Q6FGG2|Q6FGG2_HUMANVAMP3proteinOS=HomosapiensGN=VAMP3PE=2SV=1;sp|Q15836|VAMP3_HUMANVesicle-associatedmembraneprotein3OS=HomosapiensGN=VAMP3PE=1SV=3;tr|K7ENK9|K7ENK9_HUMANVesicle-associatedmembraneprotein2OS=HomosapiensGN=VAMP2PE=4SV=1;tr|K7EKX0|K7EKX0_HUMANVesicle-associatedmembraneprotein3OS=HomosapiensGN=VAMP3PE=4SV=1	tr|Q6FGG2|Q6FGG2_HUMAN VAMP3 protein OS=Homo sapiens GN=VAMP3 PE=2 SV=1;sp|Q15836|VAMP3_HUMAN Vesicle-associated membrane protein 3 OS=Homo sapiens GN=VAMP3 PE=1 SV=3	17122000	44608000	58487000	39536000	6970300	45716000	17633000	19623000	4	7	6	7	6	5	6	6	6	4	2	3	3	2	3	3	3	11.309	0	86.569	By MS/MS	By MS/MS	By MS/MS	By MS/MS	By MS/MS	By MS/MS	By MS/MS	By MS/MS	62	62	62	62	46	62	62	62	85610000	223040000	292440000	197680000
sp|P13591|NCAM1_HUMANNeuralcelladhesionmolecule1OS=HomosapiensGN=NCAM1PE=1SV=3;tr|A0A087WX77|A0A087WX77_HUMANNeuralcelladhesionmolecule1OS=HomosapiensGN=NCAM1PE=1SV=1;tr|A0A087WWD4|A0A087WWD4_HUMANNeuralcelladhesionmolecule1OS=HomosapiensGN=NCAM1PE=1SV=1;tr|A0A087WV75|A0A087WV75_HUMANNeuralcelladhesionmolecule1OS=HomosapiensGN=NCAM1PE=1SV=1;sp|P13591-5|NCAM1_HUMANIsoform5ofNeuralcelladhesionmolec…	sp|P13591|NCAM1_HUMAN Neural cell adhesion molecule 1 OS=Homo sapiens GN=NCAM1 PE=1 SV=3;tr|A0A087WX77|A0A087WX77_HUMAN Neural cell adhesion molecule 1 OS=Homo sapiens GN=NCAM1 PE=1 SV=1;tr|A0A087WWD4|A0A087WWD4_HUMAN Neural cell adhesion molecule 1 OS=Hom	17115000	48358000	41140000	52393000	9223700	74221000	13767000	7454000	13	36	35	35	39	28	37	34	27	1	1	1	2	1	2	2	1	94.573	0	323.31	By MS/MS	By MS/MS	By MS/MS	By MS/MS	By MS/MS	By MS/MS	By MS/MS	By MS/MS	47.6	47.6	47.6	51	39.3	50.5	47	40.9	650350000	1837600000	1563300000	1990900000
tr|Q75ME0|Q75ME0_HUMANSTX1AproteinOS=HomosapiensGN=STX1APE=2SV=1;sp|Q16623|STX1A_HUMANSyntaxin-1AOS=HomosapiensGN=STX1APE=1SV=1;sp|Q16623-3|STX1A_HUMANIsoform3ofSyntaxin-1AOS=HomosapiensGN=STX1A;tr|A0A0C4DFZ1|A0A0C4DFZ1_HUMANSyntaxin-1AOS=HomosapiensGN=STX1APE=1SV=1;sp|Q16623-2|STX1A_HUMANIsoform2ofSyntaxin-1AOS=HomosapiensGN=STX1A;tr|A8MZ54|A8MZ54_HUMANSyntaxin-1AOS=HomosapiensGN=STX1APE=1SV=1;t…	tr|Q75ME0|Q75ME0_HUMAN STX1A protein OS=Homo sapiens GN=STX1A PE=2 SV=1;sp|Q16623|STX1A_HUMAN Syntaxin-1A OS=Homo sapiens GN=STX1A PE=1 SV=1;sp|Q16623-3|STX1A_HUMAN Isoform 3 of Syntaxin-1A OS=Homo sapiens GN=STX1A;tr|A0A0C4DFZ1|A0A0C4DFZ1_HUMAN Syntaxin-1	15658000	38882000	35124000	60227000	7336700	80709000	32889000	22137000	11	25	24	20	26	13	23	22	18	24	23	19	25	12	22	21	17	33.023	0	323.31	By MS/MS	By MS/MS	By MS/MS	By MS/MS	By MS/MS	By MS/MS	By MS/MS	By MS/MS	65.6	54.9	44.1	65.6	41	48.6	52.8	49.7	203550000	505460000	456610000	782950000
tr|V9HWN7|V9HWN7_HUMANFructose-bisphosphatealdolaseOS=HomosapiensGN=HEL-S-87pPE=2SV=1;sp|P04075|ALDOA_HUMANFructose-bisphosphatealdolaseAOS=HomosapiensGN=ALDOAPE=1SV=2;tr|J3KPS3|J3KPS3_HUMANFructose-bisphosphatealdolaseOS=HomosapiensGN=ALDOAPE=1SV=1;sp|P04075-2|ALDOA_HUMANIsoform2ofFructose-bisphosphatealdolaseAOS=HomosapiensGN=ALDOA;tr|H3BQN4|H3BQN4_HUMANFructose-bisphosphatealdolaseOS=Homosapie…	tr|V9HWN7|V9HWN7_HUMAN Fructose-bisphosphate aldolase OS=Homo sapiens GN=HEL-S-87p PE=2 SV=1;sp|P04075|ALDOA_HUMAN Fructose-bisphosphate aldolase A OS=Homo sapiens GN=ALDOA PE=1 SV=2;tr|J3KPS3|J3KPS3_HUMAN Fructose-bisphosphate aldolase OS=Homo sapiens GN=	14484000	30816000	20078000	20840000	6783600	20651000	12055000	36503000	14	27	24	23	26	23	25	25	25	24	21	20	23	20	22	22	22	39.42	0	164.57	By MS/MS	By MS/MS	By MS/MS	By MS/MS	By MS/MS	By MS/MS	By MS/MS	By MS/MS	82.7	65.9	61.8	82.4	61.5	74.7	70.9	68.1	333130000	708760000	461800000	479320000
tr|F5GZH3|F5GZH3_HUMANPleckstrinhomologydomain-containingfamilyBmember1(Fragment)OS=HomosapiensGN=PLEKHB1PE=1SV=1;tr|F5H866|F5H866_HUMANPleckstrinhomologydomain-containingfamilyBmember1(Fragment)OS=HomosapiensGN=PLEKHB1PE=1SV=1;tr|F5GZ38|F5GZ38_HUMANPleckstrinhomologydomain-containingfamilyBmember1(Fragment)OS=HomosapiensGN=PLEKHB1PE=1SV=1;tr|A0A024R5H7|A0A024R5H7_HUMANPleckstrinhomologydomaincon…	tr|F5GZH3|F5GZH3_HUMAN Pleckstrin homology domain-containing family B member 1 (Fragment) OS=Homo sapiens GN=PLEKHB1 PE=1 SV=1;tr|F5H866|F5H866_HUMAN Pleckstrin homology domain-containing family B member 1 (Fragment) OS=Homo sapiens GN=PLEKHB1 PE=1 SV=1;tr	14352000	2559800	11214000	9929700	1627100	4426500	926790	1545400	12	8	6	9	8	6	8	6	5	1	1	1	1	1	1	1	1	17.767	0	37.95	By MS/MS	By MS/MS	By MS/MS	By MS/MS	By MS/MS	By MS/MS	By MS/MS	By MS/MS	60.4	55.2	60.4	60.4	44.2	60.4	40.3	40.3	129170000	23039000	100920000	89367000
sp|P05023-4|AT1A1_HUMANIsoform4ofSodium/potassium-transportingATPasesubunitalpha-1OS=HomosapiensGN=ATP1A1;sp|P05023|AT1A1_HUMANSodium/potassium-transportingATPasesubunitalpha-1OS=HomosapiensGN=ATP1A1PE=1SV=1;sp|P05023-3|AT1A1_HUMANIsoform3ofSodium/potassium-transportingATPasesubunitalpha-1OS=HomosapiensGN=ATP1A1;tr|B7Z3V1|B7Z3V1_HUMANSodium/potassium-transportingATPasesubunitalpha(Fragment)OS=Hom…	sp|P05023-4|AT1A1_HUMAN Isoform 4 of Sodium/potassium-transporting ATPase subunit alpha-1 OS=Homo sapiens GN=ATP1A1;sp|P05023|AT1A1_HUMAN Sodium/potassium-transporting ATPase subunit alpha-1 OS=Homo sapiens GN=ATP1A1 PE=1 SV=1;sp|P05023-3|AT1A1_HUMAN Isofo	14041000	19562000	32418000	38449000	11185000	41476000	10137000	6674700	11	46	41	41	49	37	44	36	33	29	25	26	31	22	29	21	18	113	0	323.31	By MS/MS	By MS/MS	By MS/MS	By MS/MS	By MS/MS	By MS/MS	By MS/MS	By MS/MS	45.7	38.3	38.5	47.9	36.4	43.3	35.3	35	631850000	880280000	1458800000	1730200000
sp|Q13491-4|GPM6B_HUMANIsoform4ofNeuronalmembraneglycoproteinM6-bOS=HomosapiensGN=GPM6B;tr|B7Z613|B7Z613_HUMANNeuronalmembraneglycoproteinM6-bOS=HomosapiensGN=GPM6BPE=1SV=1;tr|Q59FD5|Q59FD5_HUMANGlycoproteinM6Bisoform1variant(Fragment)OS=HomosapiensPE=2SV=1	sp|Q13491-4|GPM6B_HUMAN Isoform 4 of Neuronal membrane glycoprotein M6-b OS=Homo sapiens GN=GPM6B;tr|B7Z613|B7Z613_HUMAN Neuronal membrane glycoprotein M6-b OS=Homo sapiens GN=GPM6B PE=1 SV=1;tr|Q59FD5|Q59FD5_HUMAN Glycoprotein M6B isoform 1 variant (Fragm	13602000	51075000	25191000	32198000	5964300	63407000	10878000	20987000	3	10	11	10	10	11	11	11	11	4	4	4	4	4	4	4	4	36.219	0	223.82	By MS/MS	By MS/MS	By MS/MS	By MS/MS	By MS/MS	By MS/MS	By MS/MS	By MS/MS	33.2	33.2	33.2	33.2	33.2	33.2	33.2	33.2	149620000	561820000	277110000	354180000
tr|Q5U077|Q5U077_HUMANL-lactatedehydrogenaseOS=HomosapiensGN=LDHBPE=2SV=1;sp|P07195|LDHB_HUMANL-lactatedehydrogenaseBchainOS=HomosapiensGN=LDHBPE=1SV=2;tr|A8MW50|A8MW50_HUMANL-lactatedehydrogenase(Fragment)OS=HomosapiensGN=LDHBPE=1SV=1;tr|C9J7H8|C9J7H8_HUMANL-lactatedehydrogenaseBchain(Fragment)OS=HomosapiensGN=LDHBPE=1SV=8;tr|F5H793|F5H793_HUMANL-lactatedehydrogenaseBchain(Fragment)OS=Homosapien…	tr|Q5U077|Q5U077_HUMAN L-lactate dehydrogenase OS=Homo sapiens GN=LDHB PE=2 SV=1;sp|P07195|LDHB_HUMAN L-lactate dehydrogenase B chain OS=Homo sapiens GN=LDHB PE=1 SV=2;tr|A8MW50|A8MW50_HUMAN L-lactate dehydrogenase (Fragment) OS=Homo sapiens GN=LDHB PE=1 S	13238000	31138000	24769000	26070000	7951600	31274000	8773600	6674600	6	17	15	12	18	13	16	14	12	15	13	11	16	12	15	13	11	36.638	0	66.533	By MS/MS	By MS/MS	By MS/MS	By MS/MS	By MS/MS	By MS/MS	By MS/MS	By MS/MS	55.1	44.3	32	55.1	39.2	43.1	35.3	30.8	225050000	529340000	421070000	443180000
sp|Q562R1|ACTBL_HUMANBeta-actin-likeprotein2OS=HomosapiensGN=ACTBL2PE=1SV=2	sp|Q562R1|ACTBL_HUMAN Beta-actin-like protein 2 OS=Homo sapiens GN=ACTBL2 PE=1 SV=2	11932000	10116000	0	13101000	0	0	0	0	1	8	8	6	8	5	7	7	5	2	2	1	2	1	1	1	1	42.003	0.00054585	2.7721	By MS/MS	By MS/MS	By MS/MS	By MS/MS	By matching	By MS/MS	By MS/MS	By MS/MS	21	21	16.2	21	11.7	16.2	16	14.4	250570000	212440000	0	275120000
tr|Q59GF3|Q59GF3_HUMANAquaporin4isoformavariant(Fragment)OS=HomosapiensPE=2SV=1;tr|V9PBN7|V9PBN7_HUMANAquaporin4isoformdelta4OS=HomosapiensGN=AQP4PE=1SV=1;tr|B4DHF5|B4DHF5_HUMANcDNAFLJ53738,highlysimilartoAquaporin-4OS=HomosapiensPE=2SV=1;tr|F1DSG4|F1DSG4_HUMANAquaporin4transcriptvariantaOS=HomosapiensGN=AQP4PE=2SV=1;sp|P55087|AQP4_HUMANAquaporin-4OS=HomosapiensGN=AQP4PE=1SV=2;sp|P55087-2|AQP4_HU…	tr|Q59GF3|Q59GF3_HUMAN Aquaporin 4 isoform a variant (Fragment) OS=Homo sapiens PE=2 SV=1;tr|V9PBN7|V9PBN7_HUMAN Aquaporin 4 isoform delta4 OS=Homo sapiens GN=AQP4 PE=1 SV=1;tr|B4DHF5|B4DHF5_HUMAN cDNA FLJ53738, highly similar to Aquaporin-4 OS=Homo sapien	10901000	22060000	22195000	29850000	3369200	22308000	1033000	484060	8	7	7	8	7	8	8	5	4	7	7	8	7	8	8	5	4	23.833	0	21.302	By MS/MS	By MS/MS	By MS/MS	By MS/MS	By MS/MS	By MS/MS	By MS/MS	By MS/MS	30.1	30.1	33.3	30.1	33.3	36.1	28.8	16.9	98108000	198540000	199750000	268650000
tr|V9HWB9|V9HWB9_HUMANL-lactatedehydrogenaseOS=HomosapiensGN=HEL-S-133PPE=2SV=1;sp|P00338|LDHA_HUMANL-lactatedehydrogenaseAchainOS=HomosapiensGN=LDHAPE=1SV=2;tr|B4DJI1|B4DJI1_HUMANcDNAFLJ52549,highlysimilartoL-lactatedehydrogenaseAchain(EC1.1.1.27)OS=HomosapiensPE=2SV=1;sp|P00338-3|LDHA_HUMANIsoform3ofL-lactatedehydrogenaseAchainOS=HomosapiensGN=LDHA;sp|P00338-4|LDHA_HUMANIsoform4ofL-lactatedehyd…	tr|V9HWB9|V9HWB9_HUMAN L-lactate dehydrogenase OS=Homo sapiens GN=HEL-S-133P PE=2 SV=1;sp|P00338|LDHA_HUMAN L-lactate dehydrogenase A chain OS=Homo sapiens GN=LDHA PE=1 SV=2;tr|B4DJI1|B4DJI1_HUMAN cDNA FLJ52549, highly similar to L-lactate dehydrogenase A	10896000	25437000	22054000	23603000	8253000	39971000	6939100	6891300	28	17	17	17	18	13	16	14	12	15	15	16	16	12	15	13	11	36.688	0	82.18	By MS/MS	By MS/MS	By MS/MS	By MS/MS	By MS/MS	By MS/MS	By MS/MS	By MS/MS	44	36.4	34.9	50.6	34.9	43.1	34.9	34.9	196120000	457860000	396980000	424860000
tr|A0A024R151|A0A024R151_HUMANSolutecarrierfamily44,member1,isoformCRA_aOS=HomosapiensGN=SLC44A1PE=3SV=1;sp|Q8WWI5|CTL1_HUMANCholinetransporter-likeprotein1OS=HomosapiensGN=SLC44A1PE=1SV=1;sp|Q8WWI5-3|CTL1_HUMANIsoform3ofCholinetransporter-likeprotein1OS=HomosapiensGN=SLC44A1;sp|Q8WWI5-2|CTL1_HUMANIsoform2ofCholinetransporter-likeprotein1OS=HomosapiensGN=SLC44A1;tr|B3KMS7|B3KMS7_HUMANcDNAFLJ12487…	tr|A0A024R151|A0A024R151_HUMAN Solute carrier family 44, member 1, isoform CRA_a OS=Homo sapiens GN=SLC44A1 PE=3 SV=1;sp|Q8WWI5|CTL1_HUMAN Choline transporter-like protein 1 OS=Homo sapiens GN=SLC44A1 PE=1 SV=1;sp|Q8WWI5-3|CTL1_HUMAN Isoform 3 of Choline t	10618000	7614500	15521000	15014000	3256600	12379000	2192500	10646000	6	22	14	15	21	12	16	13	12	22	14	15	21	12	16	13	12	73.301	0	82.447	By MS/MS	By MS/MS	By MS/MS	By MS/MS	By MS/MS	By MS/MS	By MS/MS	By MS/MS	34.4	21.6	24.2	33.9	19.6	27.9	24	22.1	318550000	228430000	465630000	450410000
tr|A0A024R4F1|A0A024R4F1_HUMANEnolase1,(Alpha),isoformCRA_aOS=HomosapiensGN=ENO1PE=2SV=1;sp|P06733|ENOA_HUMANAlpha-enolaseOS=HomosapiensGN=ENO1PE=1SV=2;tr|E2DRY6|E2DRY6_HUMANC-mycpromoter-bindingprotein1OS=HomosapiensPE=2SV=1;sp|P06733-2|ENOA_HUMANIsoformMBP-1ofAlpha-enolaseOS=HomosapiensGN=ENO1;tr|K7EM90|K7EM90_HUMANAlpha-enolase(Fragment)OS=HomosapiensGN=ENO1PE=1SV=1;tr|A4UCS8|A4UCS8_HUMANEnola…	tr|A0A024R4F1|A0A024R4F1_HUMAN Enolase 1, (Alpha), isoform CRA_a OS=Homo sapiens GN=ENO1 PE=2 SV=1;sp|P06733|ENOA_HUMAN Alpha-enolase OS=Homo sapiens GN=ENO1 PE=1 SV=2;tr|E2DRY6|E2DRY6_HUMAN C-myc promoter-binding protein 1 OS=Homo sapiens PE=2 SV=1;sp|P06	9783600	6180900	10674000	15601000	2959200	19977000	5925700	7392900	12	25	21	22	24	17	22	20	20	23	19	20	22	16	21	19	18	47.168	0	155.22	By MS/MS	By MS/MS	By MS/MS	By MS/MS	By MS/MS	By MS/MS	By MS/MS	By MS/MS	67.7	56.7	54.1	67.7	45.4	59	54.6	61.1	215240000	135980000	234820000	343220000
tr|J3QRU4|J3QRU4_HUMANVesicle-associatedmembraneprotein2OS=HomosapiensGN=VAMP2PE=4SV=2;sp|P63027|VAMP2_HUMANVesicle-associatedmembraneprotein2OS=HomosapiensGN=VAMP2PE=1SV=3;tr|F8WCA0|F8WCA0_HUMANVesicle-associatedmembraneprotein2OS=HomosapiensGN=VAMP2PE=4SV=1;tr|L7N2F9|L7N2F9_HUMANUncharacterizedprotein(Fragment)OS=HomosapiensPE=4SV=1	tr|J3QRU4|J3QRU4_HUMAN Vesicle-associated membrane protein 2 OS=Homo sapiens GN=VAMP2 PE=4 SV=2;sp|P63027|VAMP2_HUMAN Vesicle-associated membrane protein 2 OS=Homo sapiens GN=VAMP2 PE=1 SV=3;tr|F8WCA0|F8WCA0_HUMAN Vesicle-associated membrane protein 2 OS=H	9671700	44672000	24136000	63553000	8093000	36941000	20662000	19700000	4	7	8	8	7	7	7	7	7	4	4	4	4	4	4	4	4	12.251	0	38.305	By MS/MS	By MS/MS	By MS/MS	By MS/MS	By MS/MS	By MS/MS	By MS/MS	By MS/MS	69.9	69.9	69.9	69.9	69.9	69.9	69.9	69.9	48359000	223360000	120680000	317770000
tr|A0A140VJX1|A0A140VJX1_HUMANTesticulartissueproteinLi198OS=HomosapiensPE=2SV=1;sp|P24752|THIL_HUMANAcetyl-CoAacetyltransferase,mitochondrialOS=HomosapiensGN=ACAT1PE=1SV=1;tr|H0YEL7|H0YEL7_HUMANAcetyl-CoAacetyltransferase,mitochondrial(Fragment)OS=HomosapiensGN=ACAT1PE=1SV=1;sp|P24752-2|THIL_HUMANIsoform2ofAcetyl-CoAacetyltransferase,mitochondrialOS=HomosapiensGN=ACAT1;tr|E9PRQ6|E9PRQ6_HUMANAcet…	tr|A0A140VJX1|A0A140VJX1_HUMAN Testicular tissue protein Li 198 OS=Homo sapiens PE=2 SV=1;sp|P24752|THIL_HUMAN Acetyl-CoA acetyltransferase, mitochondrial OS=Homo sapiens GN=ACAT1 PE=1 SV=1	9431500	14235000	11081000	21534000	2107000	15380000	8192900	15587000	5	23	21	18	23	13	21	19	21	22	20	17	22	12	20	18	20	45.199	0	185.4	By MS/MS	By MS/MS	By MS/MS	By MS/MS	By MS/MS	By MS/MS	By MS/MS	By MS/MS	60.9	58.8	53.4	60.9	34	51.1	41	53.6	216920000	327400000	254870000	495280000
tr|A0A0A0MR02|A0A0A0MR02_HUMANVoltage-dependentanion-selectivechannelprotein2(Fragment)OS=HomosapiensGN=VDAC2PE=1SV=1;tr|A0A024QZT0|A0A024QZT0_HUMANVoltage-dependentanionchannel2,isoformCRA_cOS=HomosapiensGN=VDAC2PE=4SV=1;sp|P45880|VDAC2_HUMANVoltage-dependentanion-selectivechannelprotein2OS=HomosapiensGN=VDAC2PE=1SV=2;sp|P45880-2|VDAC2_HUMANIsoform2ofVoltage-dependentanion-selectivechannelprotei…	tr|A0A0A0MR02|A0A0A0MR02_HUMAN Voltage-dependent anion-selective channel protein 2 (Fragment) OS=Homo sapiens GN=VDAC2 PE=1 SV=1;tr|A0A024QZT0|A0A024QZT0_HUMAN Voltage-dependent anion channel 2, isoform CRA_c OS=Homo sapiens GN=VDAC2 PE=4 SV=1;sp|P45880|VD	9372900	23099000	19069000	22864000	10123000	39352000	7407600	2891700	10	13	16	14	13	11	16	14	10	13	16	14	13	11	16	14	10	30.348	0	87.638	By MS/MS	By MS/MS	By MS/MS	By MS/MS	By MS/MS	By MS/MS	By MS/MS	By MS/MS	63.1	71.6	70.2	58.9	48.9	71.6	70.2	49.3	131220000	323390000	266960000	320090000
tr|A0A0D9SF30|A0A0D9SF30_HUMANNeuralcelladhesionmolecule1(Fragment)OS=HomosapiensGN=NCAM1PE=1SV=1	tr|A0A0D9SF30|A0A0D9SF30_HUMAN Neural cell adhesion molecule 1 (Fragment) OS=Homo sapiens GN=NCAM1 PE=1 SV=1	9352700	26299000	25575000	26249000	5728800	35204000	6746600	5355800	1	19	19	20	19	16	19	18	17	13	13	14	13	11	13	12	11	47.017	0	89.363	By MS/MS	By MS/MS	By MS/MS	By MS/MS	By MS/MS	By MS/MS	By MS/MS	By MS/MS	60.7	60.7	60.7	60.7	59.2	60.7	60.7	60.7	149640000	420780000	409200000	419980000
sp|P06396-3|GELS_HUMANIsoform3ofGelsolinOS=HomosapiensGN=GSN;tr|A0A0U1RQL8|A0A0U1RQL8_HUMANGelsolin(Fragment)OS=HomosapiensGN=GSNPE=1SV=1	sp|P06396-3|GELS_HUMAN Isoform 3 of Gelsolin OS=Homo sapiens GN=GSN	8717400	1032500	4363300	4783200	942150	2202500	1319100	4784900	2	31	14	18	24	16	17	16	17	1	0	0	0	0	0	0	0	81.94	0	292.94	By MS/MS	By MS/MS	By MS/MS	By MS/MS	By MS/MS	By MS/MS	By MS/MS	By MS/MS	48.8	27.4	30.6	45.1	24.1	27.4	27.4	28.4	278960000	33041000	139620000	153060000
tr|Q6FHM2|Q6FHM2_HUMANGNB2proteinOS=HomosapiensGN=GNB2PE=2SV=1;sp|P62879|GBB2_HUMANGuaninenucleotide-bindingproteinG(I)/G(S)/G(T)subunitbeta-2OS=HomosapiensGN=GNB2PE=1SV=3;tr|C9JXA5|C9JXA5_HUMANGuaninenucleotide-bindingproteinG(I)/G(S)/G(T)subunitbeta-2(Fragment)OS=HomosapiensGN=GNB2PE=1SV=1;tr|E7EP32|E7EP32_HUMANGuaninenucleotide-bindingproteinG(I)/G(S)/G(T)subunitbeta-2OS=HomosapiensGN=GNB2PE=1…	tr|Q6FHM2|Q6FHM2_HUMAN GNB2 protein OS=Homo sapiens GN=GNB2 PE=2 SV=1;sp|P62879|GBB2_HUMAN Guanine nucleotide-binding protein G(I)/G(S)/G(T) subunit beta-2 OS=Homo sapiens GN=GNB2 PE=1 SV=3;tr|C9JXA5|C9JXA5_HUMAN Guanine nucleotide-binding protein G(I)/G(S	8680700	7412400	8815200	12794000	1708800	18604000	2914000	1202700	8	17	11	11	16	9	12	9	8	9	4	4	8	3	5	3	3	37.331	0	107.7	By MS/MS	By MS/MS	By MS/MS	By MS/MS	By MS/MS	By MS/MS	By MS/MS	By MS/MS	68.5	45	45	65	28.8	52.1	33.5	26.8	112850000	96361000	114600000	166320000
tr|V9HWF2|V9HWF2_HUMANMalatedehydrogenaseOS=HomosapiensGN=HEL-S-32PE=2SV=1;sp|P40925|MDHC_HUMANMalatedehydrogenase,cytoplasmicOS=HomosapiensGN=MDH1PE=1SV=4;sp|P40925-3|MDHC_HUMANIsoform3ofMalatedehydrogenase,cytoplasmicOS=HomosapiensGN=MDH1;sp|P40925-2|MDHC_HUMANIsoform2ofMalatedehydrogenase,cytoplasmicOS=HomosapiensGN=MDH1;tr|B9A041|B9A041_HUMANMalatedehydrogenase,cytoplasmicOS=HomosapiensGN=MDH…	tr|V9HWF2|V9HWF2_HUMAN Malate dehydrogenase OS=Homo sapiens GN=HEL-S-32 PE=2 SV=1;sp|P40925|MDHC_HUMAN Malate dehydrogenase, cytoplasmic OS=Homo sapiens GN=MDH1 PE=1 SV=4;sp|P40925-3|MDHC_HUMAN Isoform 3 of Malate dehydrogenase, cytoplasmic OS=Homo sapiens	8668500	8743300	11619000	18237000	2875800	14684000	7898600	7751100	9	14	12	11	14	8	13	14	10	14	12	11	14	8	13	14	10	36.426	0	41.571	By MS/MS	By MS/MS	By MS/MS	By MS/MS	By MS/MS	By MS/MS	By MS/MS	By MS/MS	45.2	45.2	41.3	45.2	30.8	43.1	46.1	36.8	130030000	131150000	174290000	273560000
sp|Q92599|SEPT8_HUMANSeptin-8OS=HomosapiensGN=SEPT8PE=1SV=4;tr|B7ZVZ1|B7ZVZ1_HUMANSEPT8proteinOS=HomosapiensGN=SEPT8PE=2SV=1;sp|Q92599-2|SEPT8_HUMANIsoform2ofSeptin-8OS=HomosapiensGN=SEPT8;tr|A6NMH6|A6NMH6_HUMANSeptin-8OS=HomosapiensGN=SEPT8PE=1SV=1;tr|A6NFQ9|A6NFQ9_HUMANSeptin-8OS=HomosapiensGN=SEPT8PE=1SV=1;sp|Q92599-4|SEPT8_HUMANIsoform4ofSeptin-8OS=HomosapiensGN=SEPT8;tr|F8W8I8|F8W8I8_HUMANSe…	sp|Q92599|SEPT8_HUMAN Septin-8 OS=Homo sapiens GN=SEPT8 PE=1 SV=4;tr|B7ZVZ1|B7ZVZ1_HUMAN SEPT8 protein OS=Homo sapiens GN=SEPT8 PE=2 SV=1;sp|Q92599-2|SEPT8_HUMAN Isoform 2 of Septin-8 OS=Homo sapiens GN=SEPT8;tr|A6NMH6|A6NMH6_HUMAN Septin-8 OS=Homo sapiens	8502700	8470000	8498500	14546000	2239200	12978000	3862600	2910600	12	28	20	20	26	12	26	20	17	25	17	17	23	10	21	17	14	55.756	0	134.71	By MS/MS	By MS/MS	By MS/MS	By MS/MS	By MS/MS	By MS/MS	By MS/MS	By MS/MS	59.6	46.2	45.8	58.2	24.4	63.1	44.3	34.2	178560000	177870000	178470000	305470000
tr|A0A024QZ62|A0A024QZ62_HUMANHCG1998851,isoformCRA_cOS=HomosapiensGN=hCG_1998851PE=4SV=1;sp|Q14254|FLOT2_HUMANFlotillin-2OS=HomosapiensGN=FLOT2PE=1SV=2;tr|Q6FG43|Q6FG43_HUMANFLOT2proteinOS=HomosapiensGN=FLOT2PE=2SV=1;tr|Q9BTI6|Q9BTI6_HUMANFLOT2proteinOS=HomosapiensGN=FLOT2PE=2SV=1	tr|A0A024QZ62|A0A024QZ62_HUMAN HCG1998851, isoform CRA_c OS=Homo sapiens GN=hCG_1998851 PE=4 SV=1;sp|Q14254|FLOT2_HUMAN Flotillin-2 OS=Homo sapiens GN=FLOT2 PE=1 SV=2;tr|Q6FG43|Q6FG43_HUMAN FLOT2 protein OS=Homo sapiens GN=FLOT2 PE=2 SV=1;tr|Q9BTI6|Q9BTI6_	8413700	15995000	8371900	19140000	1831400	32418000	4513600	1827600	4	33	31	28	34	19	34	28	19	1	1	1	1	0	1	1	1	47.064	0	195.75	By MS/MS	By MS/MS	By MS/MS	By MS/MS	By MS/MS	By MS/MS	By MS/MS	By MS/MS	65.9	64.3	58.4	68	39.7	67.8	56.8	41.1	218760000	415880000	217670000	497640000
tr|A0A0D9SG72|A0A0D9SG72_HUMANSyntaxin-bindingprotein1OS=HomosapiensGN=STXBP1PE=1SV=2;tr|Q68CM6|Q68CM6_HUMANSTXBP1proteinOS=HomosapiensGN=stxbp1PE=2SV=1;sp|P61764|STXB1_HUMANSyntaxin-bindingprotein1OS=HomosapiensGN=STXBP1PE=1SV=1;tr|B7Z1V5|B7Z1V5_HUMANcDNAFLJ55678,highlysimilartoSyntaxin-bindingprotein1OS=HomosapiensPE=2SV=1;tr|A0A1B0GWF2|A0A1B0GWF2_HUMANSyntaxin-bindingprotein1OS=HomosapiensGN=S…	tr|A0A0D9SG72|A0A0D9SG72_HUMAN Syntaxin-binding protein 1 OS=Homo sapiens GN=STXBP1 PE=1 SV=2;tr|Q68CM6|Q68CM6_HUMAN STXBP1 protein OS=Homo sapiens GN=stxbp1 PE=2 SV=1;sp|P61764|STXB1_HUMAN Syntaxin-binding protein 1 OS=Homo sapiens GN=STXBP1 PE=1 SV=1;tr|	8369300	23497000	32869000	31275000	9579300	44454000	10142000	6604400	15	38	31	33	39	30	44	33	26	3	2	3	3	2	4	3	2	66.16	0	218.69	By MS/MS	By MS/MS	By MS/MS	By MS/MS	By MS/MS	By MS/MS	By MS/MS	By MS/MS	66.9	62.2	62.2	66.9	54.7	68.4	63.4	52.8	242710000	681410000	953190000	906960000
tr|V9HW74|V9HW74_HUMANUbiquitincarboxyl-terminalhydrolaseOS=HomosapiensGN=HEL-117PE=2SV=1;sp|P09936|UCHL1_HUMANUbiquitincarboxyl-terminalhydrolaseisozymeL1OS=HomosapiensGN=UCHL1PE=1SV=2;tr|D6RE83|D6RE83_HUMANUbiquitincarboxyl-terminalhydrolaseOS=HomosapiensGN=UCHL1PE=1SV=1;tr|B2RD14|B2RD14_HUMANUbiquitincarboxyl-terminalhydrolaseOS=HomosapiensPE=2SV=1;tr|A6NLJ7|A6NLJ7_HUMANUbiquitincarboxyl-termi…	tr|V9HW74|V9HW74_HUMAN Ubiquitin carboxyl-terminal hydrolase OS=Homo sapiens GN=HEL-117 PE=2 SV=1;sp|P09936|UCHL1_HUMAN Ubiquitin carboxyl-terminal hydrolase isozyme L1 OS=Homo sapiens GN=UCHL1 PE=1 SV=2;tr|D6RE83|D6RE83_HUMAN Ubiquitin carboxyl-terminal h	8297700	15009000	8535000	14420000	1615100	17738000	8184200	11898000	8	13	13	9	12	7	13	14	12	13	13	9	12	7	13	14	12	24.824	0	100.76	By MS/MS	By MS/MS	By MS/MS	By MS/MS	By MS/MS	By MS/MS	By MS/MS	By MS/MS	57.8	57.8	48.9	51.1	39.5	61.4	61.4	59.6	82977000	150090000	85350000	144200000
tr|B4DG42|B4DG42_HUMANcDNAFLJ53753,highlysimilartoMyeloid-associateddifferentiationmarkerOS=HomosapiensPE=2SV=1;tr|A0A024R4N0|A0A024R4N0_HUMANHCG1640809,isoformCRA_bOS=HomosapiensGN=hCG_1640809PE=4SV=1;sp|Q96S97|MYADM_HUMANMyeloid-associateddifferentiationmarkerOS=HomosapiensGN=MYADMPE=1SV=2;tr|C9JZL8|C9JZL8_HUMANMyeloid-associateddifferentiationmarker(Fragment)OS=HomosapiensGN=MYADMPE=1SV=1;tr|C…	tr|B4DG42|B4DG42_HUMAN cDNA FLJ53753, highly similar to Myeloid-associated differentiation marker OS=Homo sapiens PE=2 SV=1;tr|A0A024R4N0|A0A024R4N0_HUMAN HCG1640809, isoform CRA_b OS=Homo sapiens GN=hCG_1640809 PE=4 SV=1;sp|Q96S97|MYADM_HUMAN Myeloid-asso	8245100	6490800	7938800	9999900	259960	11787000	2590400	1042300	7	6	4	4	6	1	3	3	3	6	4	4	6	1	3	3	3	31.225	0	29.452	By MS/MS	By MS/MS	By MS/MS	By MS/MS	By MS/MS	By MS/MS	By MS/MS	By MS/MS	23.9	21.8	21.8	23.9	3.5	15.4	15.4	15.4	57716000	45436000	55571000	69999000
sp|P35908|K22E_HUMANKeratin,typeIIcytoskeletal2epidermalOS=HomosapiensGN=KRT2PE=1SV=2	sp|P35908|K22E_HUMAN Keratin, type II cytoskeletal 2 epidermal OS=Homo sapiens GN=KRT2 PE=1 SV=2	8053900	18832000	10799000	7892000	3720500	8075600	13983000	39076000	1	42	38	33	40	26	29	41	38	1	1	1	1	1	0	1	1	65.432	0	262.67	By MS/MS	By MS/MS	By MS/MS	By MS/MS	By MS/MS	By MS/MS	By MS/MS	By MS/MS	70.4	68.7	60.7	70	52.4	56.8	77.2	72.9	322160000	753300000	431970000	315680000
sp|P02792|FRIL_HUMANFerritinlightchainOS=HomosapiensGN=FTLPE=1SV=2;tr|Q6S4P3|Q6S4P3_HUMANFerritinOS=HomosapiensGN=FTLPE=1SV=1;tr|B1Q3B3|B1Q3B3_HUMANFerritin(Fragment)OS=HomosapiensGN=FTLPE=3SV=1;tr|B1Q3B4|B1Q3B4_HUMANFerritin(Fragment)OS=HomosapiensGN=FTLvariantPE=3SV=1;tr|B1Q387|B1Q387_HUMANFerritin(Fragment)OS=HomosapiensGN=FTLPE=3SV=1;tr|Q4FCH6|Q4FCH6_HUMANFerritin(Fragment)OS=HomosapiensGN=FT…	sp|P02792|FRIL_HUMAN Ferritin light chain OS=Homo sapiens GN=FTL PE=1 SV=2;tr|Q6S4P3|Q6S4P3_HUMAN Ferritin OS=Homo sapiens GN=FTL PE=1 SV=1;tr|B1Q3B3|B1Q3B3_HUMAN Ferritin (Fragment) OS=Homo sapiens GN=FTL PE=3 SV=1;tr|B1Q3B4|B1Q3B4_HUMAN Ferritin (Fragmen	8023900	1304600	3340100	6961700	592240	4454800	1599100	6222700	6	7	5	5	7	3	5	6	6	7	5	5	7	3	5	6	6	20.019	0	14.69	By MS/MS	By MS/MS	By MS/MS	By MS/MS	By MS/MS	By MS/MS	By MS/MS	By MS/MS	48.6	30.3	30.3	48.6	21.1	30.3	36	36	64192000	10437000	26721000	55693000
tr|Q6GMX6|Q6GMX6_HUMANIGH@proteinOS=HomosapiensGN=IGH@PE=1SV=1;sp|P01857|IGHG1_HUMANImmunoglobulinheavyconstantgamma1OS=HomosapiensGN=IGHG1PE=1SV=1;tr|Q6PYX1|Q6PYX1_HUMANHepatitisBvirusreceptorbindingprotein(Fragment)OS=HomosapiensPE=1SV=1;tr|A0A0A0MS08|A0A0A0MS08_HUMANImmunoglobulinheavyconstantgamma1(Fragment)OS=HomosapiensGN=IGHG1PE=1SV=1;sp|P0DOX5|IGG1_HUMANImmunoglobulingamma-1heavychainOS=H…	tr|Q6GMX6|Q6GMX6_HUMAN IGH@ protein OS=Homo sapiens GN=IGH@ PE=1 SV=1;sp|P01857|IGHG1_HUMAN Immunoglobulin heavy constant gamma 1 OS=Homo sapiens GN=IGHG1 PE=1 SV=1;tr|Q6PYX1|Q6PYX1_HUMAN Hepatitis B virus receptor binding protein (Fragment) OS=Homo sapien	7886300	5595600	2688300	4234300	677450	2364700	967360	1455400	58	11	10	9	9	6	8	8	9	3	3	2	2	1	2	2	2	51.082	0	45.744	By MS/MS	By MS/MS	By MS/MS	By MS/MS	By MS/MS	By MS/MS	By MS/MS	By MS/MS	33.3	32.5	29	29	21.1	27.5	27.5	29	181390000	128700000	61831000	97389000
tr|V9HWC7|V9HWC7_HUMANEpididymissecretoryspermbindingproteinLi128mOS=HomosapiensGN=HEL-S-128mPE=2SV=1;sp|P30041|PRDX6_HUMANPeroxiredoxin-6OS=HomosapiensGN=PRDX6PE=1SV=3;tr|A4UCS6|A4UCS6_HUMANPeroxiredoxin6(Fragment)OS=HomosapiensPE=2SV=1;tr|B4DUK1|B4DUK1_HUMANcDNAFLJ51310,moderatelysimilartoPeroxiredoxin-6(EC1.11.1.15)OS=HomosapiensPE=2SV=1	tr|V9HWC7|V9HWC7_HUMAN Epididymis secretory sperm binding protein Li 128m OS=Homo sapiens GN=HEL-S-128m PE=2 SV=1;sp|P30041|PRDX6_HUMAN Peroxiredoxin-6 OS=Homo sapiens GN=PRDX6 PE=1 SV=3	7886100	3503600	5599800	9596700	1256600	6933500	3038800	3517900	4	17	13	13	15	11	13	13	10	17	13	13	15	11	13	13	10	25.035	0	51.376	By MS/MS	By MS/MS	By MS/MS	By MS/MS	By MS/MS	By MS/MS	By MS/MS	By MS/MS	69.6	58	58	69.2	49.6	68.3	64.7	42	118290000	52554000	83997000	143950000
tr|B4DNW4|B4DNW4_HUMANcDNAFLJ51915,highlysimilartoAquaporin-1OS=HomosapiensPE=2SV=1;tr|B2R6P2|B2R6P2_HUMANcDNA,FLJ93046,highlysimilartoHomosapiensaquaporin1(channel-formingintegralprotein,28kDa)(AQP1),mRNAOS=HomosapiensPE=2SV=1;tr|A0A024RA31|A0A024RA31_HUMANAquaporin1(Channel-formingintegralprotein,28kDa)OS=HomosapiensGN=AQP1PE=3SV=1;sp|P29972|AQP1_HUMANAquaporin-1OS=HomosapiensGN=AQP1PE=1SV=3;tr…	tr|B4DNW4|B4DNW4_HUMAN cDNA FLJ51915, highly similar to Aquaporin-1 OS=Homo sapiens PE=2 SV=1;tr|B2R6P2|B2R6P2_HUMAN cDNA, FLJ93046, highly similar to Homo sapiens aquaporin 1 (channel-forming integral protein, 28kDa) (AQP1), mRNA OS=Homo sapiens PE=2 SV=1	7771900	1023300	5736400	5655700	493510	2749900	903190	571960	18	4	2	2	4	3	2	2	2	4	2	2	4	3	2	2	2	26.875	0	45.744	By MS/MS	By MS/MS	By MS/MS	By MS/MS	By MS/MS	By MS/MS	By MS/MS	By MS/MS	16.9	13.8	13.8	16.9	17.3	13.8	13.8	13.8	31088000	4093200	22946000	22623000
tr|D9YZU5|D9YZU5_HUMANBeta-globinOS=HomosapiensGN=HBBPE=3SV=1;sp|P68871|HBB_HUMANHemoglobinsubunitbetaOS=HomosapiensGN=HBBPE=1SV=2;tr|C8C504|C8C504_HUMANBeta-globinOS=HomosapiensGN=HBBPE=3SV=1;tr|Q0Z944|Q0Z944_HUMANBetaglobin(Fragment)OS=HomosapiensGN=HBBPE=3SV=1;tr|Q9BWV6|Q9BWV6_HUMANMutantbetaglobinOS=HomosapiensGN=HBBPE=3SV=1;tr|Q9GZL9|Q9GZL9_HUMANBeta-globin(Fragment)OS=HomosapiensGN=HBBPE=3S…	tr|D9YZU5|D9YZU5_HUMAN Beta-globin OS=Homo sapiens GN=HBB PE=3 SV=1;sp|P68871|HBB_HUMAN Hemoglobin subunit beta OS=Homo sapiens GN=HBB PE=1 SV=2;tr|C8C504|C8C504_HUMAN Beta-globin OS=Homo sapiens GN=HBB PE=3 SV=1;tr|Q0Z944|Q0Z944_HUMAN Beta globin (Fragmen	7768700	26161000	10346000	14373000	4349400	14476000	3378400	8395100	51	11	9	8	10	7	10	10	10	1	1	1	1	1	1	1	1	15.998	0	56.34	By MS/MS	By MS/MS	By MS/MS	By MS/MS	By MS/MS	By MS/MS	By MS/MS	By MS/MS	78.9	69.4	56.5	66	45.6	66	70.7	78.2	85455000	287770000	113810000	158100000
sp|P04899|GNAI2_HUMANGuaninenucleotide-bindingproteinG(i)subunitalpha-2OS=HomosapiensGN=GNAI2PE=1SV=3;tr|B3KX51|B3KX51_HUMANcDNAFLJ44754fis,cloneBRACE3030748,highlysimilartoGuaninenucleotide-bindingproteinG(i),alpha-2subunitOS=HomosapiensPE=2SV=1;sp|P04899-6|GNAI2_HUMANIsoform6ofGuaninenucleotide-bindingproteinG(i)subunitalpha-2OS=HomosapiensGN=GNAI2;sp|P04899-3|GNAI2_HUMANIsoform3ofGuaninenucleo…	sp|P04899|GNAI2_HUMAN Guanine nucleotide-binding protein G(i) subunit alpha-2 OS=Homo sapiens GN=GNAI2 PE=1 SV=3;tr|B3KX51|B3KX51_HUMAN cDNA FLJ44754 fis, clone BRACE3030748, highly similar to Guanine nucleotide-binding protein G(i), alpha-2 subunit OS=Hom	7633600	5928000	3998800	7185700	720470	5016900	2161000	6554300	11	22	19	15	22	11	18	17	15	13	11	8	13	5	11	10	8	40.45	0	116.62	By MS/MS	By MS/MS	By MS/MS	By MS/MS	By MS/MS	By MS/MS	By MS/MS	By MS/MS	64.8	53.8	46.5	62.5	35.8	56.9	51.8	47.3	129770000	100780000	67980000	122160000
tr|Q5ST80|Q5ST80_HUMANFLOT1OS=HomosapiensGN=FLOT1PE=2SV=1;sp|O75955|FLOT1_HUMANFlotillin-1OS=HomosapiensGN=FLOT1PE=1SV=3;tr|Q6IB58|Q6IB58_HUMANFLOT1proteinOS=HomosapiensGN=FLOT1PE=2SV=1;tr|Q53HQ0|Q53HQ0_HUMANFlotillin1variant(Fragment)OS=HomosapiensPE=2SV=1;tr|A0A140T9R1|A0A140T9R1_HUMANFlotillin-1(Fragment)OS=HomosapiensGN=FLOT1PE=1SV=1;sp|O75955-2|FLOT1_HUMANIsoform2ofFlotillin-1OS=HomosapiensG…	tr|Q5ST80|Q5ST80_HUMAN FLOT1 OS=Homo sapiens GN=FLOT1 PE=2 SV=1;sp|O75955|FLOT1_HUMAN Flotillin-1 OS=Homo sapiens GN=FLOT1 PE=1 SV=3;tr|Q6IB58|Q6IB58_HUMAN FLOT1 protein OS=Homo sapiens GN=FLOT1 PE=2 SV=1;tr|Q53HQ0|Q53HQ0_HUMAN Flotillin 1 variant (Fragmen	7513900	11603000	8365900	16539000	1134700	27747000	6784200	1326500	24	26	27	26	28	16	30	26	20	26	27	26	28	16	30	26	20	47.355	0	124.02	By MS/MS	By MS/MS	By MS/MS	By MS/MS	By MS/MS	By MS/MS	By MS/MS	By MS/MS	68.6	65.6	61.1	68.6	37.7	73.8	67.2	48	202880000	313280000	225880000	446540000
tr|Q8IWE0|Q8IWE0_HUMANCalcium/calmodulin-dependentproteinkinaseIIalphaOS=HomosapiensGN=CAMK2APE=2SV=1;tr|Q7LDD5|Q7LDD5_HUMANCalcium/calmodulin-dependentproteinkinase(CaMkinase)IIalpha,isoformCRA_aOS=HomosapiensGN=CAMK2APE=2SV=1;sp|Q9UQM7|KCC2A_HUMANCalcium/calmodulin-dependentproteinkinasetypeIIsubunitalphaOS=HomosapiensGN=CAMK2APE=1SV=2;tr|A8K161|A8K161_HUMANCalcium/calmodulin-dependentproteinki…	tr|Q8IWE0|Q8IWE0_HUMAN Calcium/calmodulin-dependent protein kinase II alpha OS=Homo sapiens GN=CAMK2A PE=2 SV=1;tr|Q7LDD5|Q7LDD5_HUMAN Calcium/calmodulin-dependent protein kinase (CaM kinase) II alpha, isoform CRA_a OS=Homo sapiens GN=CAMK2A PE=2 SV=1;sp|Q	7326400	14191000	13539000	25358000	3006900	37562000	9801800	6055300	7	23	20	18	23	18	22	20	17	15	13	11	15	11	14	13	10	54.087	0	179.97	By MS/MS	By MS/MS	By MS/MS	By MS/MS	By MS/MS	By MS/MS	By MS/MS	By MS/MS	47.7	40.8	38.7	47.7	40.4	46	42.7	37.9	175830000	340580000	324930000	608600000
tr|V9HWD9|V9HWD9_HUMANEpididymisluminalprotein107OS=HomosapiensGN=HEL107PE=2SV=1;sp|P29401|TKT_HUMANTransketolaseOS=HomosapiensGN=TKTPE=1SV=3;sp|P29401-2|TKT_HUMANIsoform2ofTransketolaseOS=HomosapiensGN=TKT;tr|B4E022|B4E022_HUMANcDNAFLJ56274,highlysimilartoTransketolase(EC2.2.1.1)OS=HomosapiensPE=2SV=1;tr|Q53EM5|Q53EM5_HUMANTransketolasevariant(Fragment)OS=HomosapiensPE=2SV=1;tr|B3KSI4|B3KSI4_HUM…	tr|V9HWD9|V9HWD9_HUMAN Epididymis luminal protein 107 OS=Homo sapiens GN=HEL107 PE=2 SV=1;sp|P29401|TKT_HUMAN Transketolase OS=Homo sapiens GN=TKT PE=1 SV=3;sp|P29401-2|TKT_HUMAN Isoform 2 of Transketolase OS=Homo sapiens GN=TKT;tr|B4E022|B4E022_HUMAN cDNA	7281400	5511500	10938000	13761000	1840200	10537000	2374000	2087700	16	25	23	21	25	17	21	19	13	25	23	21	25	17	21	19	13	67.877	0	103.89	By MS/MS	By MS/MS	By MS/MS	By MS/MS	By MS/MS	By MS/MS	By MS/MS	By MS/MS	52.2	42.9	40	52.2	32.6	42.4	41.1	27.8	182040000	137790000	273450000	344030000
tr|A0A024R882|A0A024R882_HUMANStomatin,isoformCRA_aOS=HomosapiensGN=STOMPE=4SV=1;sp|P27105|STOM_HUMANErythrocyteband7integralmembraneproteinOS=HomosapiensGN=STOMPE=1SV=3;tr|B4E2V5|B4E2V5_HUMANcDNAFLJ52062,highlysimilartoErythrocyteband7integralmembraneproteinOS=HomosapiensPE=2SV=1;tr|B4DZK8|B4DZK8_HUMANcDNAFLJ61192,highlysimilartoErythrocyteband7integralmembraneproteinOS=HomosapiensPE=2SV=1;sp|P2…	tr|A0A024R882|A0A024R882_HUMAN Stomatin, isoform CRA_a OS=Homo sapiens GN=STOM PE=4 SV=1;sp|P27105|STOM_HUMAN Erythrocyte band 7 integral membrane protein OS=Homo sapiens GN=STOM PE=1 SV=3;tr|B4E2V5|B4E2V5_HUMAN cDNA FLJ52062, highly similar to Erythrocyte	7204700	8069200	6164500	10921000	2325900	13355000	2141800	1117400	7	12	12	12	14	9	12	11	7	12	12	12	14	9	12	11	7	31.73	0	58.736	By MS/MS	By MS/MS	By MS/MS	By MS/MS	By MS/MS	By MS/MS	By MS/MS	By MS/MS	36.5	40.6	36.5	46.2	31.9	42	40.6	26	108070000	121040000	92467000	163810000
tr|B4DI81|B4DI81_HUMANGapjunctionproteinOS=HomosapiensPE=2SV=1;tr|Q53FJ6|Q53FJ6_HUMANGapjunctionprotein(Fragment)OS=HomosapiensPE=2SV=1;sp|P17302|CXA1_HUMANGapjunctionalpha-1proteinOS=HomosapiensGN=GJA1PE=1SV=2;tr|B4DN50|B4DN50_HUMANGapjunctionproteinOS=HomosapiensPE=2SV=1;tr|B4DMC9|B4DMC9_HUMANGapjunctionproteinOS=HomosapiensPE=2SV=1;tr|B4DGM6|B4DGM6_HUMANGapjunctionproteinOS=HomosapiensPE=2SV=1…	tr|B4DI81|B4DI81_HUMAN Gap junction protein OS=Homo sapiens PE=2 SV=1;tr|Q53FJ6|Q53FJ6_HUMAN Gap junction protein (Fragment) OS=Homo sapiens PE=2 SV=1;sp|P17302|CXA1_HUMAN Gap junction alpha-1 protein OS=Homo sapiens GN=GJA1 PE=1 SV=2;tr|B4DN50|B4DN50_HUMA	7039400	5329200	5865100	8316200	1459000	10113000	2410100	769370	8	16	13	14	17	8	14	14	8	16	13	14	17	8	14	14	8	40.511	0	91.238	By MS/MS	By MS/MS	By MS/MS	By MS/MS	By MS/MS	By MS/MS	By MS/MS	By MS/MS	51.2	36.8	41.3	55.7	25.5	48.5	44.6	31.3	119670000	90597000	99706000	141380000
tr|G9FP35|G9FP35_HUMANGuaninenucleotidebindingproteinOS=HomosapiensGN=GNAQPE=2SV=1;tr|A0A024R240|A0A024R240_HUMANGuaninenucleotidebindingprotein(Gprotein),qpolypeptide,isoformCRA_cOS=HomosapiensGN=GNAQPE=4SV=1;sp|P50148|GNAQ_HUMANGuaninenucleotide-bindingproteinG(q)subunitalphaOS=HomosapiensGN=GNAQPE=1SV=4;tr|B1AM21|B1AM21_HUMANGuaninenucleotide-bindingproteinG(q)subunitalpha(Fragment)OS=Homosapi…	tr|G9FP35|G9FP35_HUMAN Guanine nucleotide binding protein OS=Homo sapiens GN=GNAQ PE=2 SV=1;tr|A0A024R240|A0A024R240_HUMAN Guanine nucleotide binding protein (G protein), q polypeptide, isoform CRA_c OS=Homo sapiens GN=GNAQ PE=4 SV=1;sp|P50148|GNAQ_HUMAN G	7015900	3778400	2197700	3942000	191510	1870300	1895100	6009600	5	19	13	9	17	6	10	11	11	11	8	6	10	4	7	8	8	42.111	0	38.019	By MS/MS	By MS/MS	By MS/MS	By MS/MS	By MS/MS	By MS/MS	By MS/MS	By MS/MS	56	39.6	26.2	56	16.2	30.4	34	34	133300000	71791000	41757000	74898000
sp|P05026-2|AT1B1_HUMANIsoform2ofSodium/potassium-transportingATPasesubunitbeta-1OS=HomosapiensGN=ATP1B1;tr|Q6LEU2|Q6LEU2_HUMANSodium/potassium-transportingATPasesubunitbeta(Fragment)OS=HomosapiensGN=ATP1B1PE=2SV=1;tr|A3KLL5|A3KLL5_HUMANSodium/potassium-transportingATPasesubunitbetaOS=HomosapiensGN=ATP1B1PE=2SV=1;sp|P05026|AT1B1_HUMANSodium/potassium-transportingATPasesubunitbeta-1OS=HomosapiensG…	sp|P05026-2|AT1B1_HUMAN Isoform 2 of Sodium/potassium-transporting ATPase subunit beta-1 OS=Homo sapiens GN=ATP1B1;tr|Q6LEU2|Q6LEU2_HUMAN Sodium/potassium-transporting ATPase subunit beta (Fragment) OS=Homo sapiens GN=ATP1B1 PE=2 SV=1;tr|A3KLL5|A3KLL5_HUMA	6976600	22383000	24825000	23511000	7675300	34326000	7766900	5914400	8	13	12	12	13	10	13	12	10	13	12	12	13	10	13	12	10	34.893	0	47.689	By MS/MS	By MS/MS	By MS/MS	By MS/MS	By MS/MS	By MS/MS	By MS/MS	By MS/MS	39.5	43.9	43.9	44.9	31.9	44.5	40.9	38.5	83719000	268590000	297910000	282140000
tr|A0A0S2Z3X8|A0A0S2Z3X8_HUMANRabGDPdissociationinhibitor(Fragment)OS=HomosapiensGN=GDI1PE=2SV=1;sp|P31150|GDIA_HUMANRabGDPdissociationinhibitoralphaOS=HomosapiensGN=GDI1PE=1SV=2;tr|B4DHX4|B4DHX4_HUMANRabGDPdissociationinhibitorOS=HomosapiensPE=2SV=1;tr|B4DH24|B4DH24_HUMANRabGDPdissociationinhibitorOS=HomosapiensPE=2SV=1;tr|B4E070|B4E070_HUMANcDNAFLJ53519,highlysimilartoRabGDPdissociationinhibito…	tr|A0A0S2Z3X8|A0A0S2Z3X8_HUMAN Rab GDP dissociation inhibitor (Fragment) OS=Homo sapiens GN=GDI1 PE=2 SV=1;sp|P31150|GDIA_HUMAN Rab GDP dissociation inhibitor alpha OS=Homo sapiens GN=GDI1 PE=1 SV=2;tr|B4DHX4|B4DHX4_HUMAN Rab GDP dissociation inhibitor OS=	6923200	8862800	10696000	10234000	3345000	11801000	5467600	4596300	7	30	23	25	32	19	26	24	21	21	15	17	22	11	17	16	13	50.582	0	169.78	By MS/MS	By MS/MS	By MS/MS	By MS/MS	By MS/MS	By MS/MS	By MS/MS	By MS/MS	68.2	54.4	58.6	72.9	47.2	59.7	55.5	54.4	173080000	221570000	267390000	255850000
sp|Q06830|PRDX1_HUMANPeroxiredoxin-1OS=HomosapiensGN=PRDX1PE=1SV=1;tr|A0A0A0MSI0|A0A0A0MSI0_HUMANPeroxiredoxin-1(Fragment)OS=HomosapiensGN=PRDX1PE=1SV=1;tr|B2R4P2|B2R4P2_HUMANcDNA,FLJ92164,highlysimilartoHomosapiensperoxiredoxin1(PRDX1),mRNAOS=HomosapiensPE=2SV=1;tr|A0A0A0MRQ5|A0A0A0MRQ5_HUMANPeroxiredoxin-1OS=HomosapiensGN=PRDX1PE=1SV=1	sp|Q06830|PRDX1_HUMAN Peroxiredoxin-1 OS=Homo sapiens GN=PRDX1 PE=1 SV=1;tr|A0A0A0MSI0|A0A0A0MSI0_HUMAN Peroxiredoxin-1 (Fragment) OS=Homo sapiens GN=PRDX1 PE=1 SV=1;tr|B2R4P2|B2R4P2_HUMAN cDNA, FLJ92164, highly similar to Homo sapiens peroxiredoxin 1 (PRD	6760600	5346800	6530100	7176900	1129500	8067400	3293700	7226300	4	13	9	10	13	7	11	11	9	10	7	7	10	5	8	8	7	22.11	0	39.561	By MS/MS	By MS/MS	By MS/MS	By MS/MS	By MS/MS	By MS/MS	By MS/MS	By MS/MS	66.8	50.8	50.8	66.8	32.7	62.8	62.8	48.7	101410000	80201000	97952000	107650000
sp|P68366-2|TBA4A_HUMANIsoform2ofTubulinalpha-4AchainOS=HomosapiensGN=TUBA4A;sp|P68366|TBA4A_HUMANTubulinalpha-4AchainOS=HomosapiensGN=TUBA4APE=1SV=1;tr|C9JEV8|C9JEV8_HUMANTubulinalphachain(Fragment)OS=HomosapiensGN=TUBA4APE=1SV=1;tr|C9JQ00|C9JQ00_HUMANTubulinalphachain(Fragment)OS=HomosapiensGN=TUBA4APE=1SV=1;tr|C9JJQ8|C9JJQ8_HUMANTubulinalphachain(Fragment)OS=HomosapiensGN=TUBA4APE=1SV=1;tr|C9J…	sp|P68366-2|TBA4A_HUMAN Isoform 2 of Tubulin alpha-4A chain OS=Homo sapiens GN=TUBA4A;sp|P68366|TBA4A_HUMAN Tubulin alpha-4A chain OS=Homo sapiens GN=TUBA4A PE=1 SV=1	6700800	15445000	9905600	11295000	11836000	14435000	4022700	17965000	6	27	23	22	27	18	24	23	21	6	4	4	6	4	5	5	4	48.328	0	16.347	By MS/MS	By MS/MS	By MS/MS	By MS/MS	By MS/MS	By MS/MS	By MS/MS	By MS/MS	65.6	58	53.1	65.4	46.2	60.7	55.9	54.5	147420000	339790000	217920000	248490000
tr|Q0QF37|Q0QF37_HUMANMalatedehydrogenase(Fragment)OS=HomosapiensGN=MDH2PE=2SV=1;tr|Q75MT9|Q75MT9_HUMANMalatedehydrogenase(Fragment)OS=HomosapiensGN=MDH2PE=3SV=1;tr|Q6FHZ0|Q6FHZ0_HUMANMalatedehydrogenaseOS=HomosapiensGN=MDH2PE=2SV=1;tr|A0A024R4K3|A0A024R4K3_HUMANMalatedehydrogenaseOS=HomosapiensGN=MDH2PE=2SV=1;sp|P40926|MDHM_HUMANMalatedehydrogenase,mitochondrialOS=HomosapiensGN=MDH2PE=1SV=3;sp|P…	tr|Q0QF37|Q0QF37_HUMAN Malate dehydrogenase (Fragment) OS=Homo sapiens GN=MDH2 PE=2 SV=1;tr|Q75MT9|Q75MT9_HUMAN Malate dehydrogenase (Fragment) OS=Homo sapiens GN=MDH2 PE=3 SV=1;tr|Q6FHZ0|Q6FHZ0_HUMAN Malate dehydrogenase OS=Homo sapiens GN=MDH2 PE=2 SV=1;	6511300	10148000	15658000	28360000	3410900	33188000	11393000	7332000	8	16	15	14	16	13	17	16	13	16	15	14	16	13	17	16	13	31.969	0	87.093	By MS/MS	By MS/MS	By MS/MS	By MS/MS	By MS/MS	By MS/MS	By MS/MS	By MS/MS	65.9	59.7	55.7	65.9	55.4	65.9	65.9	52.1	117200000	182660000	281850000	510480000
sp|P43004|EAA2_HUMANExcitatoryaminoacidtransporter2OS=HomosapiensGN=SLC1A2PE=1SV=2;tr|A2A2U1|A2A2U1_HUMANAminoacidtransporterOS=HomosapiensGN=SLC1A2PE=2SV=1;sp|P43004-2|EAA2_HUMANIsoform2ofExcitatoryaminoacidtransporter2OS=HomosapiensGN=SLC1A2;tr|Q59FL6|Q59FL6_HUMANAminoacidtransporter(Fragment)OS=HomosapiensPE=2SV=1;sp|P43004-3|EAA2_HUMANIsoform3ofExcitatoryaminoacidtransporter2OS=HomosapiensGN=…	sp|P43004|EAA2_HUMAN Excitatory amino acid transporter 2 OS=Homo sapiens GN=SLC1A2 PE=1 SV=2;tr|A2A2U1|A2A2U1_HUMAN Amino acid transporter OS=Homo sapiens GN=SLC1A2 PE=2 SV=1;sp|P43004-2|EAA2_HUMAN Isoform 2 of Excitatory amino acid transporter 2 OS=Homo s	6487300	62386000	43978000	61562000	18341000	127300000	11609000	1542600	9	17	16	17	17	15	20	15	9	17	16	17	17	15	20	15	9	62.104	0	126	By MS/MS	By MS/MS	By MS/MS	By MS/MS	By MS/MS	By MS/MS	By MS/MS	By MS/MS	27.4	29.3	29.3	27.4	26.5	30	26.5	15.3	136230000	1310100000	923550000	1292800000
tr|B7Z9V4|B7Z9V4_HUMANSodium/potassium-transportingATPasesubunitalphaOS=HomosapiensPE=2SV=1;sp|P13637-3|AT1A3_HUMANIsoform3ofSodium/potassium-transportingATPasesubunitalpha-3OS=HomosapiensGN=ATP1A3;tr|M0R116|M0R116_HUMANSodium/potassium-transportingATPasesubunitalphaOS=HomosapiensGN=ATP1A3PE=1SV=1;tr|Q53ES0|Q53ES0_HUMANSodium/potassium-transportingATPasesubunitalpha(Fragment)OS=HomosapiensPE=2SV=…	tr|B7Z9V4|B7Z9V4_HUMAN Sodium/potassium-transporting ATPase subunit alpha OS=Homo sapiens PE=2 SV=1;sp|P13637-3|AT1A3_HUMAN Isoform 3 of Sodium/potassium-transporting ATPase subunit alpha-3 OS=Homo sapiens GN=ATP1A3;tr|M0R116|M0R116_HUMAN Sodium/potassium-	6387900	9908900	14424000	16475000	5179900	20470000	5602800	4371600	18	47	41	40	47	40	42	38	35	27	22	22	26	23	26	23	19	113.08	0	221.43	By MS/MS	By MS/MS	By MS/MS	By MS/MS	By MS/MS	By MS/MS	By MS/MS	By MS/MS	46.6	41.5	40.9	48.2	39.4	43.6	39.8	36.3	300230000	465720000	677950000	774340000
tr|A0A024R3J8|A0A024R3J8_HUMANFXYDdomaincontainingiontransportregulator6,isoformCRA_aOS=HomosapiensGN=FXYD6PE=4SV=1;sp|Q9H0Q3|FXYD6_HUMANFXYDdomain-containingiontransportregulator6OS=HomosapiensGN=FXYD6PE=1SV=1;tr|J3QKN1|J3QKN1_HUMANFXYDdomaincontainingiontransportregulator6,isoformCRA_bOS=HomosapiensGN=FXYD6PE=4SV=1;tr|E9PJ02|E9PJ02_HUMANFXYDdomain-containingiontransportregulator6OS=HomosapiensG…	tr|A0A024R3J8|A0A024R3J8_HUMAN FXYD domain containing ion transport regulator 6, isoform CRA_a OS=Homo sapiens GN=FXYD6 PE=4 SV=1;sp|Q9H0Q3|FXYD6_HUMAN FXYD domain-containing ion transport regulator 6 OS=Homo sapiens GN=FXYD6 PE=1 SV=1;tr|J3QKN1|J3QKN1_HUM	6360300	11539000	17501000	18178000	1695400	32966000	4193700	3569300	8	3	3	3	3	2	3	3	3	3	3	3	3	2	3	3	3	10.542	0	25.1	By MS/MS	By MS/MS	By MS/MS	By MS/MS	By MS/MS	By MS/MS	By MS/MS	By MS/MS	40	40	40	40	26.3	42.1	42.1	42.1	25441000	46154000	70005000	72712000
tr|A0A024R3Z5|A0A024R3Z5_HUMANLanClantibioticsynthetasecomponentC-like1(Bacterial),isoformCRA_bOS=HomosapiensGN=LANCL1PE=4SV=1;tr|Q6FHH6|Q6FHH6_HUMANLANCL1protein(Fragment)OS=HomosapiensGN=LANCL1PE=2SV=1;tr|Q53TN2|Q53TN2_HUMANLanClantibioticsynthetasecomponentC-like1(Bacterial),isoformCRA_aOS=HomosapiensGN=LANCL1PE=4SV=1;sp|O43813|LANC1_HUMANLanC-likeprotein1OS=HomosapiensGN=LANCL1PE=1SV=1;tr|B2R…	tr|A0A024R3Z5|A0A024R3Z5_HUMAN LanC lantibiotic synthetase component C-like 1 (Bacterial), isoform CRA_b OS=Homo sapiens GN=LANCL1 PE=4 SV=1;tr|Q6FHH6|Q6FHH6_HUMAN LANCL1 protein (Fragment) OS=Homo sapiens GN=LANCL1 PE=2 SV=1;tr|Q53TN2|Q53TN2_HUMAN LanC la	6227600	5539100	5529600	10389000	1673600	7464600	1693400	1175700	9	20	14	11	19	9	14	10	7	20	14	11	19	9	14	10	7	46.485	0	52.081	By MS/MS	By MS/MS	By MS/MS	By MS/MS	By MS/MS	By MS/MS	By MS/MS	By MS/MS	54.7	35	29.4	54.7	23.6	40.1	28.7	23.4	118320000	105240000	105060000	197380000
sp|Q71U36-2|TBA1A_HUMANIsoform2ofTubulinalpha-1AchainOS=HomosapiensGN=TUBA1A;sp|Q71U36|TBA1A_HUMANTubulinalpha-1AchainOS=HomosapiensGN=TUBA1APE=1SV=1;tr|B4DQK4|B4DQK4_HUMANTubulinalphachainOS=HomosapiensPE=2SV=1;tr|Q9UQM3|Q9UQM3_HUMANTubulinalphachain(Fragment)OS=HomosapiensPE=2SV=1;tr|Q1ZYQ1|Q1ZYQ1_HUMANTubulinalphachainOS=HomosapiensGN=TUBA2PE=2SV=1;sp|Q13748|TBA3C_HUMANTubulinalpha-3C/DchainOS…	sp|Q71U36-2|TBA1A_HUMAN Isoform 2 of Tubulin alpha-1A chain OS=Homo sapiens GN=TUBA1A;sp|Q71U36|TBA1A_HUMAN Tubulin alpha-1A chain OS=Homo sapiens GN=TUBA1A PE=1 SV=1;tr|B4DQK4|B4DQK4_HUMAN Tubulin alpha chain OS=Homo sapiens PE=2 SV=1;tr|Q9UQM3|Q9UQM3_HUM	5994100	8329600	15667000	10322000	3005900	16379000	9830000	16968000	9	29	24	24	27	18	24	24	23	1	1	1	1	1	1	1	1	46.297	0	26.613	By MS/MS	By MS/MS	By MS/MS	By MS/MS	By MS/MS	By MS/MS	By MS/MS	By MS/MS	72.6	65.1	65.1	67.3	53.4	68.3	63.7	63.7	125880000	174920000	329010000	216760000
tr|F5GZV7|F5GZV7_HUMANVesicle-associatedmembraneprotein1OS=HomosapiensGN=VAMP1PE=1SV=1;sp|P23763-2|VAMP1_HUMANIsoform3ofVesicle-associatedmembraneprotein1OS=HomosapiensGN=VAMP1;sp|P23763-3|VAMP1_HUMANIsoform2ofVesicle-associatedmembraneprotein1OS=HomosapiensGN=VAMP1;sp|P23763|VAMP1_HUMANVesicle-associatedmembraneprotein1OS=HomosapiensGN=VAMP1PE=1SV=1;tr|B4DZX9|B4DZX9_HUMANcDNAFLJ57686,highlysimil…	tr|F5GZV7|F5GZV7_HUMAN Vesicle-associated membrane protein 1 OS=Homo sapiens GN=VAMP1 PE=1 SV=1;sp|P23763-2|VAMP1_HUMAN Isoform 3 of Vesicle-associated membrane protein 1 OS=Homo sapiens GN=VAMP1;sp|P23763-3|VAMP1_HUMAN Isoform 2 of Vesicle-associated memb	5924200	14265000	12676000	24895000	5566900	40006000	5145100	3440200	7	5	7	5	5	5	5	5	4	4	5	3	4	4	4	4	3	12.599	0	78.622	By MS/MS	By MS/MS	By MS/MS	By MS/MS	By MS/MS	By MS/MS	By MS/MS	By MS/MS	43.1	69.8	42.2	43.1	43.1	43.1	43.1	42.2	23697000	57061000	50706000	99581000
sp|P42765|THIM_HUMAN3-ketoacyl-CoAthiolase,mitochondrialOS=HomosapiensGN=ACAA2PE=1SV=2;tr|B2RB23|B2RB23_HUMANcDNA,FLJ95265,highlysimilartoHomosapiensacetyl-CoenzymeAacyltransferase2(mitochondrial3-oxoacyl-CoenzymeAthiolase)(ACAA2),nucleargeneencodingmitochondrialprotein,mRNAOS=HomosapiensPE=2SV=1;tr|A0A0B4J2A4|A0A0B4J2A4_HUMAN3-ketoacyl-CoAthiolase,mitochondrialOS=HomosapiensGN=ACAA2PE=1SV=1;tr|B…	sp|P42765|THIM_HUMAN 3-ketoacyl-CoA thiolase, mitochondrial OS=Homo sapiens GN=ACAA2 PE=1 SV=2;tr|B2RB23|B2RB23_HUMAN cDNA, FLJ95265, highly similar to Homo sapiens acetyl-Coenzyme A acyltransferase 2 (mitochondrial 3-oxoacyl-Coenzyme A thiolase) (ACAA2),	5875300	4491600	5169900	7066700	1062900	4345500	3351000	3656800	8	25	19	15	22	12	17	21	17	25	19	15	22	12	17	21	17	41.924	0	145.57	By MS/MS	By MS/MS	By MS/MS	By MS/MS	By MS/MS	By MS/MS	By MS/MS	By MS/MS	67.5	57.2	56.7	59.4	32.7	56.4	69.5	55.4	123380000	94323000	108570000	148400000
tr|A0A024R1Y6|A0A024R1Y6_HUMANParalemmin,isoformCRA_aOS=HomosapiensGN=PALMPE=4SV=1;sp|O75781|PALM_HUMANParalemmin-1OS=HomosapiensGN=PALMPE=1SV=2;tr|B2RCL4|B2RCL4_HUMANcDNA,FLJ96143,highlysimilartoHomosapiensparalemmin(PALM),mRNAOS=HomosapiensPE=2SV=1;tr|B7Z649|B7Z649_HUMANcDNAFLJ52739,highlysimilartoParalemminOS=HomosapiensPE=2SV=1;tr|A0A087WTK8|A0A087WTK8_HUMANParalemmin-1OS=HomosapiensGN=PALMPE…	tr|A0A024R1Y6|A0A024R1Y6_HUMAN Paralemmin, isoform CRA_a OS=Homo sapiens GN=PALM PE=4 SV=1;sp|O75781|PALM_HUMAN Paralemmin-1 OS=Homo sapiens GN=PALM PE=1 SV=2;tr|B2RCL4|B2RCL4_HUMAN cDNA, FLJ96143, highly similar to Homo sapiens paralemmin (PALM), mRNA OS=	5514900	12212000	10351000	10731000	1349500	13034000	3439200	2570300	5	19	16	19	18	12	19	16	14	0	0	0	0	0	0	0	0	42.075	0	217.04	By MS/MS	By MS/MS	By MS/MS	By MS/MS	By MS/MS	By MS/MS	By MS/MS	By MS/MS	59.9	52.5	54.8	57.4	42.6	56.8	51.9	45	126840000	280870000	238080000	246810000
sp|P29992|GNA11_HUMANGuaninenucleotide-bindingproteinsubunitalpha-11OS=HomosapiensGN=GNA11PE=1SV=2;tr|Q59FM5|Q59FM5_HUMANGuaninenucleotide-bindingproteinG,alphasubunitvariant(Fragment)OS=HomosapiensPE=2SV=1;tr|K7EL62|K7EL62_HUMANGuaninenucleotide-bindingproteinsubunitalpha-11(Fragment)OS=HomosapiensGN=GNA11PE=1SV=1;tr|B7Z581|B7Z581_HUMANcDNAFLJ50831,highlysimilartoGuaninenucleotide-bindingprotein…	sp|P29992|GNA11_HUMAN Guanine nucleotide-binding protein subunit alpha-11 OS=Homo sapiens GN=GNA11 PE=1 SV=2;tr|Q59FM5|Q59FM5_HUMAN Guanine nucleotide-binding protein G, alpha subunit variant (Fragment) OS=Homo sapiens PE=2 SV=1	5447600	1847000	921620	3415500	229870	1141200	1096300	5699200	6	19	13	11	18	7	10	11	12	10	7	7	10	4	6	7	9	42.123	0	35.288	By MS/MS	By MS/MS	By MS/MS	By MS/MS	By MS/MS	By MS/MS	By MS/MS	By MS/MS	54.9	39	31.5	54.9	17.8	29.5	31.5	31.8	103500000	35093000	17511000	64895000
sp|Q7Z6L0|PRRT2_HUMANProline-richtransmembraneprotein2OS=HomosapiensGN=PRRT2PE=1SV=1;sp|Q7Z6L0-2|PRRT2_HUMANIsoform2ofProline-richtransmembraneprotein2OS=HomosapiensGN=PRRT2;sp|Q7Z6L0-3|PRRT2_HUMANIsoform3ofProline-richtransmembraneprotein2OS=HomosapiensGN=PRRT2;tr|A0A0G2JLL6|A0A0G2JLL6_HUMANUncharacterizedproteinOS=HomosapiensPE=4SV=1;tr|A0A1B0GTP1|A0A1B0GTP1_HUMANProline-richtransmembraneprotei…	sp|Q7Z6L0|PRRT2_HUMAN Proline-rich transmembrane protein 2 OS=Homo sapiens GN=PRRT2 PE=1 SV=1;sp|Q7Z6L0-2|PRRT2_HUMAN Isoform 2 of Proline-rich transmembrane protein 2 OS=Homo sapiens GN=PRRT2;sp|Q7Z6L0-3|PRRT2_HUMAN Isoform 3 of Proline-rich transmembrane	5446600	33944000	18501000	20904000	3110500	35790000	7128400	3619400	12	11	12	11	11	9	9	9	9	11	12	11	11	9	9	9	9	34.945	0	59.908	By MS/MS	By MS/MS	By MS/MS	By MS/MS	By MS/MS	By MS/MS	By MS/MS	By MS/MS	58.2	58.2	58.2	58.2	49.1	55	55	55	81699000	509160000	277520000	313560000
sp|P28907|CD38_HUMANADP-ribosylcyclase/cyclicADP-ribosehydrolase1OS=HomosapiensGN=CD38PE=1SV=2;tr|B2R880|B2R880_HUMANcDNA,FLJ93778,highlysimilartoHomosapiensCD38antigen(p45)(CD38),mRNAOS=HomosapiensPE=2SV=1;sp|P28907-2|CD38_HUMANIsoform2ofADP-ribosylcyclase/cyclicADP-ribosehydrolase1OS=HomosapiensGN=CD38;tr|H0Y950|H0Y950_HUMANADP-ribosylcyclase/cyclicADP-ribosehydrolase1(Fragment)OS=HomosapiensGN…	sp|P28907|CD38_HUMAN ADP-ribosyl cyclase/cyclic ADP-ribose hydrolase 1 OS=Homo sapiens GN=CD38 PE=1 SV=2;tr|B2R880|B2R880_HUMAN cDNA, FLJ93778, highly similar to Homo sapiens CD38 antigen (p45) (CD38), mRNA OS=Homo sapiens PE=2 SV=1	5346600	746610	3296600	3452600	321630	810610	826750	3132000	7	16	12	13	14	6	9	11	13	16	12	13	14	6	9	11	13	34.328	0	33.01	By MS/MS	By MS/MS	By MS/MS	By MS/MS	By MS/MS	By MS/MS	By MS/MS	By MS/MS	51	41.7	47	48.3	22	34	42.3	46.3	101590000	14186000	62635000	65599000
tr|V9HWF5|V9HWF5_HUMANPeptidyl-prolylcis-transisomeraseOS=HomosapiensGN=HEL-S-69pPE=1SV=1;tr|A8K486|A8K486_HUMANPeptidyl-prolylcis-transisomeraseOS=HomosapiensPE=2SV=1;sp|P62937|PPIA_HUMANPeptidyl-prolylcis-transisomeraseAOS=HomosapiensGN=PPIAPE=1SV=2;tr|B2RE56|B2RE56_HUMANPeptidyl-prolylcis-transisomeraseOS=HomosapiensPE=2SV=1;tr|B4DM82|B4DM82_HUMANPeptidyl-prolylcis-transisomeraseOS=Homosapiens…	tr|V9HWF5|V9HWF5_HUMAN Peptidyl-prolyl cis-trans isomerase OS=Homo sapiens GN=HEL-S-69p PE=1 SV=1;tr|A8K486|A8K486_HUMAN Peptidyl-prolyl cis-trans isomerase OS=Homo sapiens PE=2 SV=1;sp|P62937|PPIA_HUMAN Peptidyl-prolyl cis-trans isomerase A OS=Homo sapien	5336600	1840200	3970700	5716100	1287300	4392800	1366100	7799000	19	9	8	6	10	6	10	8	11	9	8	6	10	6	10	8	11	18.012	0	41.981	By MS/MS	By MS/MS	By MS/MS	By MS/MS	By MS/MS	By MS/MS	By MS/MS	By MS/MS	63	52.1	32.1	63	23.6	69.7	38.8	60	53366000	18402000	39707000	57161000
sp|P63096|GNAI1_HUMANGuaninenucleotide-bindingproteinG(i)subunitalpha-1OS=HomosapiensGN=GNAI1PE=1SV=2;sp|P63096-2|GNAI1_HUMANIsoform2ofGuaninenucleotide-bindingproteinG(i)subunitalpha-1OS=HomosapiensGN=GNAI1;tr|C9JPP4|C9JPP4_HUMANGuaninenucleotide-bindingproteinG(i)subunitalpha-1(Fragment)OS=HomosapiensGN=GNAI1PE=1SV=1;tr|C9JL77|C9JL77_HUMANGuaninenucleotide-bindingproteinG(i)subunitalpha-1(Fragm…	sp|P63096|GNAI1_HUMAN Guanine nucleotide-binding protein G(i) subunit alpha-1 OS=Homo sapiens GN=GNAI1 PE=1 SV=2;sp|P63096-2|GNAI1_HUMAN Isoform 2 of Guanine nucleotide-binding protein G(i) subunit alpha-1 OS=Homo sapiens GN=GNAI1;tr|C9JPP4|C9JPP4_HUMAN Gu	5265100	4805200	4727100	5626100	741150	6007900	1602200	4012500	9	17	15	14	18	13	15	15	14	8	7	7	9	7	8	8	7	40.361	0	79.424	By MS/MS	By MS/MS	By MS/MS	By MS/MS	By MS/MS	By MS/MS	By MS/MS	By MS/MS	46.6	38.1	35.9	54	35.3	36.4	38.1	38.1	78977000	72078000	70907000	84392000
tr|B7Z4G9|B7Z4G9_HUMANcDNAFLJ59344,highlysimilartoMembraneproteinMLC1OS=HomosapiensPE=2SV=1;tr|Q6NSL6|Q6NSL6_HUMANMegalencephalicleukoencephalopathywithsubcorticalcysts1OS=HomosapiensGN=MLC1PE=2SV=1;tr|A0A024R4V4|A0A024R4V4_HUMANMegalencephalicleukoencephalopathywithsubcorticalcysts1,isoformCRA_aOS=HomosapiensGN=MLC1PE=4SV=1;sp|Q15049|MLC1_HUMANMembraneproteinMLC1OS=HomosapiensGN=MLC1PE=1SV=5;sp|…	tr|B7Z4G9|B7Z4G9_HUMAN cDNA FLJ59344, highly similar to Membrane protein MLC1 OS=Homo sapiens PE=2 SV=1;tr|Q6NSL6|Q6NSL6_HUMAN Megalencephalic leukoencephalopathy with subcortical cysts 1 OS=Homo sapiens GN=MLC1 PE=2 SV=1;tr|A0A024R4V4|A0A024R4V4_HUMAN Meg	5196600	8007200	4863100	6791900	827040	14183000	1536900	161090	7	11	10	10	11	7	11	9	3	2	2	2	2	1	2	2	1	37.414	0	58.152	By MS/MS	By MS/MS	By MS/MS	By MS/MS	By MS/MS	By MS/MS	By MS/MS	By MS/MS	30.3	30	30	30.3	19.5	30.3	27.4	13.7	77949000	120110000	72946000	101880000
tr|D9IAI1|D9IAI1_HUMANEpididymissecretoryproteinLi34OS=HomosapiensGN=PEBP1PE=2SV=1;sp|P30086|PEBP1_HUMANPhosphatidylethanolamine-bindingprotein1OS=HomosapiensGN=PEBP1PE=1SV=3;tr|A0A0K0K1J6|A0A0K0K1J6_HUMANEpididymissecretoryproteinLi96(Fragment)OS=HomosapiensGN=HEL-S-96PE=2SV=1;tr|B4DRT4|B4DRT4_HUMANcDNAFLJ51535,highlysimilartoPhosphatidylethanolamine-bindingprotein1OS=HomosapiensPE=2SV=1;tr|V9HW…	tr|D9IAI1|D9IAI1_HUMAN Epididymis secretory protein Li 34 OS=Homo sapiens GN=PEBP1 PE=2 SV=1;sp|P30086|PEBP1_HUMAN Phosphatidylethanolamine-binding protein 1 OS=Homo sapiens GN=PEBP1 PE=1 SV=3;tr|A0A0K0K1J6|A0A0K0K1J6_HUMAN Epididymis secretory protein Li	5193400	5273100	5584500	4911400	1230400	3911800	6403200	17069000	5	9	7	7	9	6	8	9	9	9	7	7	9	6	8	9	9	21.057	0	69.441	By MS/MS	By MS/MS	By MS/MS	By MS/MS	By MS/MS	By MS/MS	By MS/MS	By MS/MS	73.3	49.2	49.2	73.3	41.7	66.3	66.8	66.8	51934000	52731000	55845000	49114000
tr|A0A140VKA9|A0A140VKA9_HUMANTestissecretorysperm-bindingproteinLi236POS=HomosapiensPE=2SV=1;sp|P09417|DHPR_HUMANDihydropteridinereductaseOS=HomosapiensGN=QDPRPE=1SV=2;sp|P09417-2|DHPR_HUMANIsoform2ofDihydropteridinereductaseOS=HomosapiensGN=QDPR;tr|B7Z415|B7Z415_HUMANDihydropteridinereductaseOS=HomosapiensGN=QDPRPE=1SV=1;tr|D6RGG7|D6RGG7_HUMANDihydropteridinereductaseOS=HomosapiensGN=QDPRPE=1SV…	tr|A0A140VKA9|A0A140VKA9_HUMAN Testis secretory sperm-binding protein Li 236P OS=Homo sapiens PE=2 SV=1;sp|P09417|DHPR_HUMAN Dihydropteridine reductase OS=Homo sapiens GN=QDPR PE=1 SV=2;sp|P09417-2|DHPR_HUMAN Isoform 2 of Dihydropteridine reductase OS=Homo	5161900	2369000	6536400	4748300	971250	3065200	1315100	4669600	7	12	9	11	12	9	12	10	10	12	9	11	12	9	12	10	10	25.789	0	79.307	By MS/MS	By MS/MS	By MS/MS	By MS/MS	By MS/MS	By MS/MS	By MS/MS	By MS/MS	53.7	44.3	53.7	53.7	36.9	52.5	51.2	51.2	72266000	33166000	91509000	66476000
sp|P05091|ALDH2_HUMANAldehydedehydrogenase,mitochondrialOS=HomosapiensGN=ALDH2PE=1SV=2;tr|Q53FB6|Q53FB6_HUMANMitochondrialaldehydedehydrogenase2variant(Fragment)OS=HomosapiensPE=2SV=1;sp|P05091-2|ALDH2_HUMANIsoform2ofAldehydedehydrogenase,mitochondrialOS=HomosapiensGN=ALDH2;tr|B4YAH7|B4YAH7_HUMANALDH2(Fragment)OS=HomosapiensGN=ALDH2PE=3SV=1;tr|S4R3S4|S4R3S4_HUMANAldehydedehydrogenase,mitochondria…	sp|P05091|ALDH2_HUMAN Aldehyde dehydrogenase, mitochondrial OS=Homo sapiens GN=ALDH2 PE=1 SV=2;tr|Q53FB6|Q53FB6_HUMAN Mitochondrial aldehyde dehydrogenase 2 variant (Fragment) OS=Homo sapiens PE=2 SV=1;sp|P05091-2|ALDH2_HUMAN Isoform 2 of Aldehyde dehydrog	4960500	3474100	4791300	7889600	1306500	6303500	2887900	2121800	18	28	23	23	27	18	21	20	15	26	21	21	25	16	19	18	13	56.381	0	70.895	By MS/MS	By MS/MS	By MS/MS	By MS/MS	By MS/MS	By MS/MS	By MS/MS	By MS/MS	56.7	42	45.3	56.7	36.6	50.3	45.1	36.2	114090000	79903000	110200000	181460000
sp|P12532|KCRU_HUMANCreatinekinaseU-type,mitochondrialOS=HomosapiensGN=CKMT1APE=1SV=1;sp|P12532-2|KCRU_HUMANIsoform2ofCreatinekinaseU-type,mitochondrialOS=HomosapiensGN=CKMT1A;tr|F8WCN3|F8WCN3_HUMANCreatinekinaseU-type,mitochondrialOS=HomosapiensGN=CKMT1BPE=1SV=1;tr|C9JSQ1|C9JSQ1_HUMANCreatinekinaseU-type,mitochondrial(Fragment)OS=HomosapiensGN=CKMT1BPE=1SV=1;tr|B4DFE8|B4DFE8_HUMANcDNAFLJ52224,hi…	sp|P12532|KCRU_HUMAN Creatine kinase U-type, mitochondrial OS=Homo sapiens GN=CKMT1A PE=1 SV=1;sp|P12532-2|KCRU_HUMAN Isoform 2 of Creatine kinase U-type, mitochondrial OS=Homo sapiens GN=CKMT1A;tr|F8WCN3|F8WCN3_HUMAN Creatine kinase U-type, mitochondrial	4928300	1352500	4608500	11320000	233760	12423000	8337600	2384100	24	18	11	11	16	4	17	17	10	18	11	11	16	4	17	17	10	47.036	0	94.362	By MS/MS	By MS/MS	By MS/MS	By MS/MS	By MS/MS	By MS/MS	By MS/MS	By MS/MS	49.6	31.9	31.9	45.8	11.3	49.2	43.2	31.9	98566000	27049000	92170000	226410000
tr|A0A024R222|A0A024R222_HUMANPhosphoserineaminotransferaseOS=HomosapiensGN=PSAT1PE=3SV=1;sp|Q9Y617|SERC_HUMANPhosphoserineaminotransferaseOS=HomosapiensGN=PSAT1PE=1SV=2;tr|B4DHQ3|B4DHQ3_HUMANPhosphoserineaminotransferaseOS=HomosapiensPE=2SV=1;tr|A0A024R280|A0A024R280_HUMANPhosphoserineaminotransferase1,isoformCRA_aOS=HomosapiensGN=PSAT1PE=3SV=1;sp|Q9Y617-2|SERC_HUMANIsoform2ofPhosphoserineaminot…	tr|A0A024R222|A0A024R222_HUMAN Phosphoserine aminotransferase OS=Homo sapiens GN=PSAT1 PE=3 SV=1;sp|Q9Y617|SERC_HUMAN Phosphoserine aminotransferase OS=Homo sapiens GN=PSAT1 PE=1 SV=2;tr|B4DHQ3|B4DHQ3_HUMAN Phosphoserine aminotransferase OS=Homo sapiens PE	4894300	1772400	2526600	3153400	633870	2758900	2379900	4011900	7	17	11	11	15	8	13	16	16	17	11	11	15	8	13	16	16	40.422	0	74.253	By MS/MS	By MS/MS	By MS/MS	By MS/MS	By MS/MS	By MS/MS	By MS/MS	By MS/MS	53.5	32.4	38.4	48.1	23.5	44.3	51.1	51.1	97886000	35448000	50531000	63068000
sp|P14415|AT1B2_HUMANSodium/potassium-transportingATPasesubunitbeta-2OS=HomosapiensGN=ATP1B2PE=1SV=3;tr|I3L3J8|I3L3J8_HUMANSodium/potassium-transportingATPasesubunitbeta(Fragment)OS=HomosapiensGN=ATP1B2PE=1SV=1;tr|I3L1V9|I3L1V9_HUMANSodium/potassium-transportingATPasesubunitbeta(Fragment)OS=HomosapiensGN=ATP1B2PE=1SV=8;tr|Q58I19|Q58I19_HUMANNa+/K+transportingATPasebeta2polypeptide(Fragment)OS=Hom…	sp|P14415|AT1B2_HUMAN Sodium/potassium-transporting ATPase subunit beta-2 OS=Homo sapiens GN=ATP1B2 PE=1 SV=3	4864800	25291000	24604000	28844000	3694700	39691000	3880200	2363200	4	13	11	11	14	10	13	11	9	13	11	11	14	10	13	11	9	33.367	0	63.136	By MS/MS	By MS/MS	By MS/MS	By MS/MS	By MS/MS	By MS/MS	By MS/MS	By MS/MS	31	28.6	28.6	40.3	28.3	40.3	37.9	23.4	63243000	328780000	319850000	374970000
tr|Q53GA9|Q53GA9_HUMANTetraspanin(Fragment)OS=HomosapiensPE=2SV=1;sp|P19075|TSN8_HUMANTetraspanin-8OS=HomosapiensGN=TSPAN8PE=1SV=1	tr|Q53GA9|Q53GA9_HUMAN Tetraspanin (Fragment) OS=Homo sapiens PE=2 SV=1;sp|P19075|TSN8_HUMAN Tetraspanin-8 OS=Homo sapiens GN=TSPAN8 PE=1 SV=1	4848300	772580	7094300	4675500	1476800	564210	1685100	1769400	2	5	3	4	6	2	2	3	4	5	3	4	6	2	2	3	4	26.071	0	40.192	By MS/MS	By MS/MS	By MS/MS	By MS/MS	By MS/MS	By MS/MS	By MS/MS	By MS/MS	25.7	14.3	25.7	31.2	8.4	8.4	11.8	16.5	43634000	6953200	63849000	42079000
tr|B3KM97|B3KM97_HUMANcDNAFLJ10554fis,cloneNT2RP2002385,highlysimilartoSynapticglycoproteinSC2OS=HomosapiensPE=2SV=1;sp|Q9NZ01|TECR_HUMANVery-long-chainenoyl-CoAreductaseOS=HomosapiensGN=TECRPE=1SV=1;tr|B3KSQ1|B3KSQ1_HUMANcDNAFLJ36768fis,cloneADIPS1000064,highlysimilartoSynapticglycoproteinSC2OS=HomosapiensPE=2SV=1;tr|M0R3C3|M0R3C3_HUMANVery-long-chainenoyl-CoAreductaseOS=HomosapiensGN=TECRPE=1SV…	tr|B3KM97|B3KM97_HUMAN cDNA FLJ10554 fis, clone NT2RP2002385, highly similar to Synaptic glycoprotein SC2 OS=Homo sapiens PE=2 SV=1;sp|Q9NZ01|TECR_HUMAN Very-long-chain enoyl-CoA reductase OS=Homo sapiens GN=TECR PE=1 SV=1;tr|B3KSQ1|B3KSQ1_HUMAN cDNA FLJ36	4828700	11177000	12183000	19171000	4111800	1672500	78921	7432200	6	5	5	3	5	3	6	2	1	5	5	3	5	3	6	2	1	36.053	0	10.631	By MS/MS	By MS/MS	By MS/MS	By MS/MS	By MS/MS	By MS/MS	By MS/MS	By MS/MS	17.9	15.6	9.4	17.9	8.8	21.1	7.1	3.2	62773000	145300000	158380000	249220000
tr|A0A024R5C4|A0A024R5C4_HUMANReticulonOS=HomosapiensGN=RTN3PE=4SV=1;sp|O95197-3|RTN3_HUMANIsoform3ofReticulon-3OS=HomosapiensGN=RTN3;tr|B7Z4M1|B7Z4M1_HUMANReticulonOS=HomosapiensGN=RTN3PE=1SV=1;sp|O95197-6|RTN3_HUMANIsoform6ofReticulon-3OS=HomosapiensGN=RTN3;sp|O95197-5|RTN3_HUMANIsoform5ofReticulon-3OS=HomosapiensGN=RTN3	tr|A0A024R5C4|A0A024R5C4_HUMAN Reticulon OS=Homo sapiens GN=RTN3 PE=4 SV=1;sp|O95197-3|RTN3_HUMAN Isoform 3 of Reticulon-3 OS=Homo sapiens GN=RTN3	4501800	383280	210460	10472000	0	3813500	299280	20501	5	4	4	5	4	3	4	4	4	1	1	1	1	0	1	1	1	25.609	0	3.2507	By MS/MS	By MS/MS	By MS/MS	By MS/MS	By matching	By MS/MS	By MS/MS	By matching	28.4	16.1	32.6	28.4	25.4	28.4	28.4	28.4	27011000	2299700	1262800	62832000
tr|A4D2P1|A4D2P1_HUMANRas-relatedC3botulinumtoxinsubstrate1(Rhofamily,smallGTPbindingproteinRac1)OS=HomosapiensGN=RAC1PE=2SV=1;sp|P63000|RAC1_HUMANRas-relatedC3botulinumtoxinsubstrate1OS=HomosapiensGN=RAC1PE=1SV=1;tr|A4D2P0|A4D2P0_HUMANRas-relatedC3botulinumtoxinsubstrate1(Rhofamily,smallGTPbindingproteinRac1)OS=HomosapiensGN=RAC1PE=2SV=1;sp|P63000-2|RAC1_HUMANIsoformBofRas-relatedC3botulinumtoxi…	tr|A4D2P1|A4D2P1_HUMAN Ras-related C3 botulinum toxin substrate 1 (Rho family, small GTP binding protein Rac1) OS=Homo sapiens GN=RAC1 PE=2 SV=1;sp|P63000|RAC1_HUMAN Ras-related C3 botulinum toxin substrate 1 OS=Homo sapiens GN=RAC1 PE=1 SV=1;tr|A4D2P0|A4D	4468500	23702000	16721000	9494500	5019900	18001000	2285000	2975700	6	10	11	9	9	6	8	6	3	3	3	3	2	1	1	0	0	21.45	0	26.615	By MS/MS	By MS/MS	By MS/MS	By MS/MS	By MS/MS	By MS/MS	By MS/MS	By MS/MS	48.4	50	44.3	48.4	27.6	40.6	29.2	15.6	35748000	189610000	133760000	75956000
tr|A0A024QZ64|A0A024QZ64_HUMANFructose-bisphosphatealdolaseOS=HomosapiensGN=ALDOCPE=3SV=1;sp|P09972|ALDOC_HUMANFructose-bisphosphatealdolaseCOS=HomosapiensGN=ALDOCPE=1SV=2;tr|B7Z1Y2|B7Z1Y2_HUMANFructose-bisphosphatealdolaseOS=HomosapiensPE=2SV=1;tr|A8MVZ9|A8MVZ9_HUMANFructose-bisphosphatealdolaseOS=HomosapiensGN=ALDOCPE=1SV=1;tr|B7Z3K9|B7Z3K9_HUMANFructose-bisphosphatealdolaseOS=HomosapiensPE=2SV…	tr|A0A024QZ64|A0A024QZ64_HUMAN Fructose-bisphosphate aldolase OS=Homo sapiens GN=ALDOC PE=3 SV=1;sp|P09972|ALDOC_HUMAN Fructose-bisphosphate aldolase C OS=Homo sapiens GN=ALDOC PE=1 SV=2;tr|B7Z1Y2|B7Z1Y2_HUMAN Fructose-bisphosphate aldolase OS=Homo sapiens	4421100	12447000	11434000	8740900	4417800	9521700	3758500	12112000	20	27	23	24	27	20	25	24	24	24	20	21	24	17	22	21	21	39.455	0	169.21	By MS/MS	By MS/MS	By MS/MS	By MS/MS	By MS/MS	By MS/MS	By MS/MS	By MS/MS	79.1	64.3	66.2	79.1	55.8	72.5	66.2	70.3	101690000	286290000	262980000	201040000
sp|Q05639|EF1A2_HUMANElongationfactor1-alpha2OS=HomosapiensGN=EEF1A2PE=1SV=1;tr|Q59GP5|Q59GP5_HUMANEukaryotictranslationelongationfactor1alpha2variant(Fragment)OS=HomosapiensPE=2SV=1;tr|Q6NS35|Q6NS35_HUMANEEF1A1proteinOS=HomosapiensGN=EEF1A1PE=2SV=1;tr|Q6NSH7|Q6NSH7_HUMANEEF1A1proteinOS=HomosapiensGN=EEF1A1PE=2SV=1	sp|Q05639|EF1A2_HUMAN Elongation factor 1-alpha 2 OS=Homo sapiens GN=EEF1A2 PE=1 SV=1;tr|Q59GP5|Q59GP5_HUMAN Eukaryotic translation elongation factor 1 alpha 2 variant (Fragment) OS=Homo sapiens PE=2 SV=1	4367100	6653900	9581600	9619300	2821200	12103000	2690200	3546100	4	15	11	10	16	9	12	11	10	8	4	4	9	3	5	4	4	50.47	0	31.447	By MS/MS	By MS/MS	By MS/MS	By MS/MS	By MS/MS	By MS/MS	By MS/MS	By MS/MS	43.8	27.4	24.2	49.9	21.6	40.8	32	28.7	91710000	139730000	201210000	202010000
tr|B4E192|B4E192_HUMANcDNAFLJ54224,highlysimilartoGlialfibrillaryacidicprotein,astrocyteOS=HomosapiensPE=2SV=1;tr|B4DJW0|B4DJW0_HUMANcDNAFLJ55696,highlysimilartoGlialfibrillaryacidicprotein,astrocyteOS=HomosapiensPE=2SV=1;sp|P14136-3|GFAP_HUMANIsoform3ofGlialfibrillaryacidicproteinOS=HomosapiensGN=GFAP;tr|K7EMP8|K7EMP8_HUMANGlialfibrillaryacidicproteinOS=HomosapiensGN=GFAPPE=1SV=2;sp|P14136|GFAP_…	tr|B4E192|B4E192_HUMAN cDNA FLJ54224, highly similar to Glial fibrillary acidic protein, astrocyte OS=Homo sapiens PE=2 SV=1;tr|B4DJW0|B4DJW0_HUMAN cDNA FLJ55696, highly similar to Glial fibrillary acidic protein, astrocyte OS=Homo sapiens PE=2 SV=1;sp|P14	4242400	760280	2363500	2738600	686960	3174800	735220	1010100	22	23	15	18	20	13	17	17	14	23	15	18	20	13	17	17	14	47.336	0	75.699	By MS/MS	By MS/MS	By MS/MS	By MS/MS	By MS/MS	By MS/MS	By MS/MS	By MS/MS	49.1	38.6	40.3	46.7	29	40.3	38.6	32.4	127270000	22808000	70906000	82158000
tr|Q6I9V5|Q6I9V5_HUMANSLC25A6proteinOS=HomosapiensGN=SLC25A6PE=2SV=1;sp|P12236|ADT3_HUMANADP/ATPtranslocase3OS=HomosapiensGN=SLC25A6PE=1SV=4;tr|Q59EI9|Q59EI9_HUMANADP,ATPcarrierprotein,liverisoformT2variant(Fragment)OS=HomosapiensPE=2SV=1;tr|O75961|O75961_HUMANADP/ATPtranslocase(Fragment)OS=HomosapiensPE=2SV=1	tr|Q6I9V5|Q6I9V5_HUMAN SLC25A6 protein OS=Homo sapiens GN=SLC25A6 PE=2 SV=1;sp|P12236|ADT3_HUMAN ADP/ATP translocase 3 OS=Homo sapiens GN=SLC25A6 PE=1 SV=4;tr|Q59EI9|Q59EI9_HUMAN ADP,ATP carrier protein, liver isoform T2 variant (Fragment) OS=Homo sapiens	4220300	24683000	18980000	20939000	8229900	40654000	2860500	834400	4	15	14	13	16	13	14	13	8	3	3	2	3	2	3	2	1	32.866	0	40.835	By MS/MS	By MS/MS	By MS/MS	By MS/MS	By MS/MS	By MS/MS	By MS/MS	By MS/MS	41.3	40.9	38.3	41.9	38.3	43.6	38.3	25.5	84406000	493660000	379610000	418780000
sp|Q9P2U7-3|VGLU1_HUMANIsoform3ofVesicularglutamatetransporter1OS=HomosapiensGN=SLC17A7;sp|Q9P2U7|VGLU1_HUMANVesicularglutamatetransporter1OS=HomosapiensGN=SLC17A7PE=2SV=1;tr|A8K0Q7|A8K0Q7_HUMANcDNAFLJ75352OS=HomosapiensPE=2SV=1;sp|Q9P2U7-2|VGLU1_HUMANIsoform2ofVesicularglutamatetransporter1OS=HomosapiensGN=SLC17A7;tr|M0R1S5|M0R1S5_HUMANVesicularglutamatetransporter1(Fragment)OS=HomosapiensGN=SLC…	sp|Q9P2U7-3|VGLU1_HUMAN Isoform 3 of Vesicular glutamate transporter 1 OS=Homo sapiens GN=SLC17A7;sp|Q9P2U7|VGLU1_HUMAN Vesicular glutamate transporter 1 OS=Homo sapiens GN=SLC17A7 PE=2 SV=1;tr|A8K0Q7|A8K0Q7_HUMAN cDNA FLJ75352 OS=Homo sapiens PE=2 SV=1;sp	3980700	36940000	20520000	20209000	4206500	54153000	9078200	1047400	15	13	15	14	14	12	15	14	9	10	12	11	11	11	12	11	8	59.887	0	41.252	By MS/MS	By MS/MS	By MS/MS	By MS/MS	By MS/MS	By MS/MS	By MS/MS	By MS/MS	20.8	21	20.8	20.8	15.3	21	19.7	14.1	83594000	775740000	430920000	424400000
tr|Q6P6D7|Q6P6D7_HUMANPhosphoglyceratemutaseOS=HomosapiensGN=PGAM1PE=2SV=1;tr|Q6FHU2|Q6FHU2_HUMANPhosphoglyceratemutase(Fragment)OS=HomosapiensGN=PGAM1PE=2SV=1;tr|Q53G35|Q53G35_HUMANPhosphoglyceratemutase(Fragment)OS=HomosapiensPE=2SV=1;sp|P18669|PGAM1_HUMANPhosphoglyceratemutase1OS=HomosapiensGN=PGAM1PE=1SV=2;tr|Q0D2Q6|Q0D2Q6_HUMANPhosphoglyceratemutaseOS=HomosapiensGN=PGAM1PE=2SV=1;tr|Q6FHK8|Q6…	tr|Q6P6D7|Q6P6D7_HUMAN Phosphoglycerate mutase OS=Homo sapiens GN=PGAM1 PE=2 SV=1;tr|Q6FHU2|Q6FHU2_HUMAN Phosphoglycerate mutase (Fragment) OS=Homo sapiens GN=PGAM1 PE=2 SV=1;tr|Q53G35|Q53G35_HUMAN Phosphoglycerate mutase (Fragment) OS=Homo sapiens PE=2 SV	3970100	6799500	6657000	5683700	2969200	6401600	2297200	12909000	11	11	7	8	10	5	10	10	9	8	4	5	7	2	7	7	6	28.82	0	35.929	By MS/MS	By MS/MS	By MS/MS	By MS/MS	By MS/MS	By MS/MS	By MS/MS	By MS/MS	55.1	33.5	41.7	46.9	26.4	40.2	40.2	39.8	51612000	88393000	86541000	73888000
sp|Q68D91|MBLC2_HUMANMetallo-beta-lactamasedomain-containingprotein2OS=HomosapiensGN=MBLAC2PE=1SV=3;sp|Q68D91-2|MBLC2_HUMANIsoform2ofMetallo-beta-lactamasedomain-containingprotein2OS=HomosapiensGN=MBLAC2	sp|Q68D91|MBLC2_HUMAN Metallo-beta-lactamase domain-containing protein 2 OS=Homo sapiens GN=MBLAC2 PE=1 SV=3;sp|Q68D91-2|MBLC2_HUMAN Isoform 2 of Metallo-beta-lactamase domain-containing protein 2 OS=Homo sapiens GN=MBLAC2	3940600	4998400	2896000	3732100	691870	2313500	5858700	6426300	2	12	12	9	12	6	11	12	10	5	5	5	5	2	5	5	5	31.371	0	60.72	By MS/MS	By MS/MS	By MS/MS	By MS/MS	By MS/MS	By MS/MS	By MS/MS	By MS/MS	50.9	50.9	32.6	50.9	17.6	44.8	50.9	45.5	78812000	99967000	57921000	74642000
NCytochromecoxidasesubunit1OS=HomosapiensGN=COX1PE=3SV=1;tr|A0A059RUQ7|A0A059RUQ7_HUMANCytochromecoxidasesubunit1OS=HomosapiensGN=COX1PE=3SV=1;tr|A0A059RUN9|A0A059RUN9_HUMANCytochromecoxidasesubunit1OS=HomosapiensGN=COX1PE=3SV=1;tr|A0A059RUL2|A0A059RUL2_HUMANCytochromecoxidasesubunit1OS=HomosapiensGN=COX1PE=3SV=1;tr|A0A059RUA5|A0A059RUA5_HUMANCytochromecoxidasesubunit1OS=HomosapiensGN=COX1PE=3SV=…	653	3911100	0	144440	1177600	163480	0	0	0	2	2	0	1	1	1	0	0	0	2	0	1	1	1	0	0	7.7	325	3.6894		By MS/MS		By MS/MS	By MS/MS	By MS/MS			0	7.7	0	5.2	5.2	5.2	0	0	16190000	11733000	0	433330	3532700
sp|Q08722|CD47_HUMANLeukocytesurfaceantigenCD47OS=HomosapiensGN=CD47PE=1SV=1;tr|H7BYS8|H7BYS8_HUMANLeukocytesurfaceantigenCD47(Fragment)OS=HomosapiensGN=CD47PE=1SV=1;sp|Q08722-2|CD47_HUMANIsoformOA3-293ofLeukocytesurfaceantigenCD47OS=HomosapiensGN=CD47;tr|A0A0A1TSG4|A0A0A1TSG4_HUMANCD47OS=HomosapiensGN=CD47PE=2SV=1;sp|Q08722-3|CD47_HUMANIsoformOA3-305ofLeukocytesurfaceantigenCD47OS=HomosapiensGN=…	sp|Q08722|CD47_HUMAN Leukocyte surface antigen CD47 OS=Homo sapiens GN=CD47 PE=1 SV=1;tr|H7BYS8|H7BYS8_HUMAN Leukocyte surface antigen CD47 (Fragment) OS=Homo sapiens GN=CD47 PE=1 SV=1;sp|Q08722-2|CD47_HUMAN Isoform OA3-293 of Leukocyte surface antigen CD4	3908500	10387000	8213700	8273800	2557000	15941000	2987900	70482	6	4	5	4	4	5	5	3	1	4	5	4	4	5	5	3	1	35.213	0	8.1672	By MS/MS	By MS/MS	By MS/MS	By MS/MS	By MS/MS	By MS/MS	By MS/MS	By matching	8.7	12.1	8.7	8.7	9.6	9.6	5.9	3.4	39085000	103870000	82137000	82738000
tr|F8WD64|F8WD64_HUMANProteinstumhomologOS=HomosapiensGN=STUMPE=1SV=1;sp|Q69YW2|STUM_HUMANProteinstumhomologOS=HomosapiensGN=STUMPE=2SV=1	tr|F8WD64|F8WD64_HUMAN Protein stum homolog OS=Homo sapiens GN=STUM PE=1 SV=1;sp|Q69YW2|STUM_HUMAN Protein stum homolog OS=Homo sapiens GN=STUM PE=2 SV=1	3735500	31719000	14417000	13444000	1295600	21983000	4194700	2413700	2	3	3	3	3	2	4	3	3	3	3	3	3	2	4	3	3	14.968	0	11.484	By MS/MS	By MS/MS	By MS/MS	By MS/MS	By MS/MS	By MS/MS	By MS/MS	By MS/MS	25.5	25.5	25.5	25.5	21.3	31.2	25.5	25.5	11206000	95156000	43251000	40333000
tr|Q8NCF7|Q8NCF7_HUMANcDNAFLJ90278fis,cloneNT2RP1000325,highlysimilartoPhosphatecarrierprotein,mitochondrialprecursorOS=HomosapiensPE=2SV=1;tr|A0A024RBE8|A0A024RBE8_HUMANSolutecarrierfamily25(Mitochondrialcarrierphosphatecarrier),member3,isoformCRA_aOS=HomosapiensGN=SLC25A3PE=2SV=1;sp|Q00325-2|MPCP_HUMANIsoformBofPhosphatecarrierprotein,mitochondrialOS=HomosapiensGN=SLC25A3;tr|B2RE88|B2RE88_HUMAN…	tr|Q8NCF7|Q8NCF7_HUMAN cDNA FLJ90278 fis, clone NT2RP1000325, highly similar to Phosphate carrier protein, mitochondrialprecursor OS=Homo sapiens PE=2 SV=1;tr|A0A024RBE8|A0A024RBE8_HUMAN Solute carrier family 25 (Mitochondrial carrier phosphate carrier), m	3720600	29057000	20224000	16833000	9928900	29185000	1895200	426240	11	15	13	12	15	8	13	7	3	15	13	12	15	8	13	7	3	39.932	0	41.714	By MS/MS	By MS/MS	By MS/MS	By MS/MS	By MS/MS	By MS/MS	By MS/MS	By MS/MS	39.3	30.5	26	39.3	21.1	33	19.1	8	66971000	523020000	364030000	303000000
sp|Q8IXJ6|SIR2_HUMANNAD-dependentproteindeacetylasesirtuin-2OS=HomosapiensGN=SIRT2PE=1SV=2;tr|A0A024R0G8|A0A024R0G8_HUMANSirtuin(Silentmatingtypeinformationregulation2homolog)2(S.cerevisiae),isoformCRA_aOS=HomosapiensGN=SIRT2PE=4SV=1;sp|Q8IXJ6-2|SIR2_HUMANIsoform2ofNAD-dependentproteindeacetylasesirtuin-2OS=HomosapiensGN=SIRT2;sp|Q8IXJ6-3|SIR2_HUMANIsoform3ofNAD-dependentproteindeacetylasesirtuin…	sp|Q8IXJ6|SIR2_HUMAN NAD-dependent protein deacetylase sirtuin-2 OS=Homo sapiens GN=SIRT2 PE=1 SV=2;tr|A0A024R0G8|A0A024R0G8_HUMAN Sirtuin (Silent mating type information regulation 2 homolog) 2 (S. cerevisiae), isoform CRA_a OS=Homo sapiens GN=SIRT2 PE=4	3704000	1102500	4487000	3999400	608210	1567900	1115900	4985700	18	14	8	11	12	9	7	10	13	14	8	11	12	9	7	10	13	43.182	0	66.889	By MS/MS	By MS/MS	By MS/MS	By MS/MS	By MS/MS	By MS/MS	By MS/MS	By MS/MS	42.2	22.1	29.8	33.2	29	21.9	31.1	39.8	85191000	25358000	103200000	91985000
tr|A0A0R4J2F2|A0A0R4J2F2_HUMANClaudindomain-containingprotein1OS=HomosapiensGN=CLDND1PE=1SV=1;tr|D6RIU2|D6RIU2_HUMANClaudindomain-containingprotein1(Fragment)OS=HomosapiensGN=CLDND1PE=1SV=1;tr|D6RDP6|D6RDP6_HUMANClaudindomain-containingprotein1(Fragment)OS=HomosapiensGN=CLDND1PE=1SV=1;tr|D6RHU6|D6RHU6_HUMANClaudindomain-containingprotein1(Fragment)OS=HomosapiensGN=CLDND1PE=1SV=1;tr|D6RDY1|D6RDY1_…	tr|A0A0R4J2F2|A0A0R4J2F2_HUMAN Claudin domain-containing protein 1 OS=Homo sapiens GN=CLDND1 PE=1 SV=1;tr|D6RIU2|D6RIU2_HUMAN Claudin domain-containing protein 1 (Fragment) OS=Homo sapiens GN=CLDND1 PE=1 SV=1;tr|D6RDP6|D6RDP6_HUMAN Claudin domain-containin	3675300	1471300	3108200	2990900	603880	1881700	595170	816200	21	7	6	6	6	3	5	5	4	7	6	6	6	3	5	5	4	31.05	0	32.39	By MS/MS	By MS/MS	By MS/MS	By MS/MS	By MS/MS	By MS/MS	By MS/MS	By MS/MS	26.1	26.1	26.1	21.7	10.5	21	21	17.8	36753000	14713000	31082000	29909000
sp|Q9H305-3|CDIP1_HUMANIsoform3ofCelldeath-inducingp53-targetprotein1OS=HomosapiensGN=CDIP1;sp|Q9H305-2|CDIP1_HUMANIsoform2ofCelldeath-inducingp53-targetprotein1OS=HomosapiensGN=CDIP1;sp|Q9H305|CDIP1_HUMANCelldeath-inducingp53-targetprotein1OS=HomosapiensGN=CDIP1PE=1SV=1;tr|K7ENR4|K7ENR4_HUMANCelldeath-inducingp53-targetprotein1(Fragment)OS=HomosapiensGN=CDIP1PE=4SV=8;tr|K7ESA8|K7ESA8_HUMANCellde…	sp|Q9H305-3|CDIP1_HUMAN Isoform 3 of Cell death-inducing p53-target protein 1 OS=Homo sapiens GN=CDIP1;sp|Q9H305-2|CDIP1_HUMAN Isoform 2 of Cell death-inducing p53-target protein 1 OS=Homo sapiens GN=CDIP1;sp|Q9H305|CDIP1_HUMAN Cell death-inducing p53-targ	3622100	14420000	9229500	7514400	3264700	14416000	5955100	3262600	7	2	2	2	2	1	1	1	1	2	2	2	2	1	1	1	1	13.763	0	3.9836	By MS/MS	By MS/MS	By MS/MS	By MS/MS	By MS/MS	By MS/MS	By MS/MS	By MS/MS	21.7	21.7	21.7	21.7	15.5	15.5	15.5	15.5	14488000	57681000	36918000	30058000
sp|Q14CZ8|HECAM_HUMANHepatocytecelladhesionmoleculeOS=HomosapiensGN=HEPACAMPE=1SV=1	sp|Q14CZ8|HECAM_HUMAN Hepatocyte cell adhesion molecule OS=Homo sapiens GN=HEPACAM PE=1 SV=1	3578600	3832800	4675600	4728200	938800	4777400	910910	1062700	1	10	10	10	10	8	9	7	7	7	7	7	7	6	6	4	4	46.026	0	27.098	By MS/MS	By MS/MS	By MS/MS	By MS/MS	By MS/MS	By MS/MS	By MS/MS	By MS/MS	31.7	31.7	31.7	31.7	23.3	28.8	24.5	24.5	75150000	80488000	98188000	99291000
tr|V9HW21|V9HW21_HUMANEpididymisluminalprotein76OS=HomosapiensGN=HEL-76PE=2SV=1;sp|P00918|CAH2_HUMANCarbonicanhydrase2OS=HomosapiensGN=CA2PE=1SV=2;tr|A0A0K0K1L1|A0A0K0K1L1_HUMANEpididymissecretoryproteinLi282OS=HomosapiensGN=HEL-S-282PE=2SV=1;tr|E5RID5|E5RID5_HUMANCarbonicanhydrase2OS=HomosapiensGN=CA2PE=1SV=1;tr|E5RK37|E5RK37_HUMANCarbonicanhydrase2OS=HomosapiensGN=CA2PE=1SV=1	tr|V9HW21|V9HW21_HUMAN Epididymis luminal protein 76 OS=Homo sapiens GN=HEL-76 PE=2 SV=1;sp|P00918|CAH2_HUMAN Carbonic anhydrase 2 OS=Homo sapiens GN=CA2 PE=1 SV=2;tr|A0A0K0K1L1|A0A0K0K1L1_HUMAN Epididymis secretory protein Li 282 OS=Homo sapiens GN=HEL-S-	3544900	2349900	6840500	6385200	1224000	1732900	430550	523000	5	10	6	7	10	6	4	6	5	10	6	7	10	6	4	6	5	29.246	0	29.402	By MS/MS	By MS/MS	By MS/MS	By MS/MS	By MS/MS	By MS/MS	By MS/MS	By MS/MS	50.4	27.3	34.2	50.4	23.1	16.5	23.1	19.2	46083000	30548000	88927000	83008000
sp|Q16658|FSCN1_HUMANFascinOS=HomosapiensGN=FSCN1PE=1SV=3;tr|B3KTA3|B3KTA3_HUMANFascinOS=HomosapiensPE=2SV=1;tr|B3KTM9|B3KTM9_HUMANcDNAFLJ38511fis,cloneHCHON2000417,highlysimilartoFASCINOS=HomosapiensPE=2SV=1;tr|C9JFC0|C9JFC0_HUMANFascin(Fragment)OS=HomosapiensGN=FSCN1PE=1SV=1;tr|A0A0A0MSB2|A0A0A0MSB2_HUMANFascin(Fragment)OS=HomosapiensGN=FSCN1PE=1SV=6;tr|C9JPH9|C9JPH9_HUMANFascin(Fragment)OS=Hom…	sp|Q16658|FSCN1_HUMAN Fascin OS=Homo sapiens GN=FSCN1 PE=1 SV=3;tr|B3KTA3|B3KTA3_HUMAN Fascin OS=Homo sapiens PE=2 SV=1	3510400	3782200	6272800	6142500	830980	3710900	933220	1303600	6	20	15	16	19	14	13	15	15	20	15	16	19	14	13	15	15	54.529	0	167.26	By MS/MS	By MS/MS	By MS/MS	By MS/MS	By MS/MS	By MS/MS	By MS/MS	By MS/MS	54.4	41.6	44.6	51.7	40.8	37.7	38.5	38.9	98292000	105900000	175640000	171990000
tr|D3DSS6|D3DSS6_HUMANDedicatorofcytokinesis5,isoformCRA_aOS=HomosapiensGN=DOCK5PE=3SV=1;sp|Q9H7D0|DOCK5_HUMANDedicatorofcytokinesisprotein5OS=HomosapiensGN=DOCK5PE=1SV=3;tr|Q5H9P3|Q5H9P3_HUMANUncharacterizedproteinDKFZp779M164(Fragment)OS=HomosapiensGN=DKFZp779M164PE=3SV=1;tr|H0Y7N4|H0Y7N4_HUMANDedicatorofcytokinesisprotein5(Fragment)OS=HomosapiensGN=DOCK5PE=1SV=1;tr|Q68DL4|Q68DL4_HUMANUncharact…	tr|D3DSS6|D3DSS6_HUMAN Dedicator of cytokinesis 5, isoform CRA_a OS=Homo sapiens GN=DOCK5 PE=3 SV=1;sp|Q9H7D0|DOCK5_HUMAN Dedicator of cytokinesis protein 5 OS=Homo sapiens GN=DOCK5 PE=1 SV=3;tr|Q5H9P3|Q5H9P3_HUMAN Uncharacterized protein DKFZp779M164 (Fra	3450500	9988.7	81601	2657.4	14322	3688900	749050	138140	5	2	1	1	1	1	1	1	1	1	1	1	0	1	1	1	1	214.07	0.0018832	1.8207	By MS/MS	By matching	By matching	By MS/MS	By matching	By MS/MS	By MS/MS	By MS/MS	1.2	0.5	0.5	0.6	0.5	0.5	0.5	0.5	334700000	968910	7915300	257760
tr|B4DUD6|B4DUD6_HUMANcDNAFLJ54551,highlysimilartoSeptin-7OS=HomosapiensPE=2SV=1;tr|Q8TC62|Q8TC62_HUMANSeptin7OS=HomosapiensGN=SEPT7PE=2SV=3;tr|E7ES33|E7ES33_HUMANSeptin-7OS=HomosapiensGN=SEPT7PE=1SV=3;tr|Q3LIE9|Q3LIE9_HUMANPredictedproteinproductofNbla02942OS=HomosapiensGN=Nbla02942PE=2SV=1;tr|A4GYY8|A4GYY8_HUMANUncharacterizedproteinDKFZp686F17268(Fragment)OS=HomosapiensGN=DKFZp686F17268PE=2SV=…	tr|B4DUD6|B4DUD6_HUMAN cDNA FLJ54551, highly similar to Septin-7 OS=Homo sapiens PE=2 SV=1;tr|Q8TC62|Q8TC62_HUMAN Septin 7 OS=Homo sapiens GN=SEPT7 PE=2 SV=3;tr|E7ES33|E7ES33_HUMAN Septin-7 OS=Homo sapiens GN=SEPT7 PE=1 SV=3;tr|Q3LIE9|Q3LIE9_HUMAN Predicte	3433700	4791800	6952700	6577200	1280700	10643000	3449000	2603300	24	21	14	14	20	12	19	19	14	21	14	14	20	12	19	19	14	47.88	0	95.953	By MS/MS	By MS/MS	By MS/MS	By MS/MS	By MS/MS	By MS/MS	By MS/MS	By MS/MS	57.8	35.6	35.6	57.6	36.3	56.6	45.1	37.6	72107000	100630000	146010000	138120000
sp|P05090|APOD_HUMANApolipoproteinDOS=HomosapiensGN=APODPE=1SV=1;tr|C9JF17|C9JF17_HUMANApolipoproteinD(Fragment)OS=HomosapiensGN=APODPE=1SV=1;tr|B4DGC3|B4DGC3_HUMANcDNAFLJ57921,highlysimilartoApolipoproteinDOS=HomosapiensPE=2SV=1;tr|C9JX71|C9JX71_HUMANApolipoproteinD(Fragment)OS=HomosapiensGN=APODPE=1SV=1;tr|F8WBT9|F8WBT9_HUMANApolipoproteinDOS=HomosapiensGN=APODPE=1SV=1	sp|P05090|APOD_HUMAN Apolipoprotein D OS=Homo sapiens GN=APOD PE=1 SV=1;tr|C9JF17|C9JF17_HUMAN Apolipoprotein D (Fragment) OS=Homo sapiens GN=APOD PE=1 SV=1	3393300	232570	1292800	3407800	345220	899360	4284500	12774000	5	7	3	4	7	4	4	8	9	7	3	4	7	4	4	8	9	21.275	0	71.738	By MS/MS	By MS/MS	By MS/MS	By MS/MS	By MS/MS	By MS/MS	By MS/MS	By MS/MS	36.5	18	24.9	32.8	24.9	24.9	41.8	41.8	30540000	2093100	11635000	30671000
tr|K7EMV3|K7EMV3_HUMANHistoneH3OS=HomosapiensGN=H3F3BPE=1SV=1;tr|K7EP01|K7EP01_HUMANHistoneH3.3OS=HomosapiensGN=H3F3BPE=1SV=1;tr|B4E380|B4E380_HUMANHistoneH3OS=HomosapiensPE=2SV=1;tr|B4DEB1|B4DEB1_HUMANHistoneH3OS=HomosapiensGN=H3F3APE=1SV=1;tr|K7EK07|K7EK07_HUMANHistoneH3(Fragment)OS=HomosapiensGN=H3F3BPE=1SV=1;sp|Q6NXT2|H3C_HUMANHistoneH3.3COS=HomosapiensGN=H3F3CPE=1SV=3;tr|Q5TEC6|Q5TEC6_HUMANH…	tr|K7EMV3|K7EMV3_HUMAN Histone H3 OS=Homo sapiens GN=H3F3B PE=1 SV=1;tr|K7EP01|K7EP01_HUMAN Histone H3.3 OS=Homo sapiens GN=H3F3B PE=1 SV=1;tr|B4E380|B4E380_HUMAN Histone H3 OS=Homo sapiens PE=2 SV=1;tr|B4DEB1|B4DEB1_HUMAN Histone H3 OS=Homo sapiens GN=H3F	3392500	3896900	10247000	4228000	3482600	6308000	1230300	9774200	17	2	2	2	2	2	2	2	2	2	2	2	2	2	2	2	2	10.334	0	3.2158	By MS/MS	By MS/MS	By MS/MS	By MS/MS	By MS/MS	By MS/MS	By MS/MS	By MS/MS	17.4	17.4	17.4	17.4	17.4	17.4	17.4	17.4	16963000	19484000	51236000	21140000
tr|A0A024RA98|A0A024RA98_HUMANPeptidylargininedeiminase,typeII,isoformCRA_aOS=HomosapiensGN=PADI2PE=4SV=1;sp|Q9Y2J8|PADI2_HUMANProtein-argininedeiminasetype-2OS=HomosapiensGN=PADI2PE=1SV=2;sp|Q9Y2J8-2|PADI2_HUMANIsoform2ofProtein-argininedeiminasetype-2OS=HomosapiensGN=PADI2;tr|B4DIU3|B4DIU3_HUMANcDNAFLJ61278,highlysimilartoProtein-argininedeiminasetype-2(EC3.5.3.15)OS=HomosapiensPE=2SV=1;tr|Q6ZW…	tr|A0A024RA98|A0A024RA98_HUMAN Peptidyl arginine deiminase, type II, isoform CRA_a OS=Homo sapiens GN=PADI2 PE=4 SV=1;sp|Q9Y2J8|PADI2_HUMAN Protein-arginine deiminase type-2 OS=Homo sapiens GN=PADI2 PE=1 SV=2;sp|Q9Y2J8-2|PADI2_HUMAN Isoform 2 of Protein-ar	3313900	440250	2200900	1880700	143400	819030	340000	445310	5	20	8	10	15	6	7	9	8	20	8	10	15	6	7	9	8	75.563	0	56.691	By MS/MS	By MS/MS	By MS/MS	By MS/MS	By MS/MS	By MS/MS	By MS/MS	By MS/MS	32	12.8	16.7	24.8	8.7	11.1	14.7	13.5	92788000	12327000	61624000	52659000
sp|Q8N111|CEND_HUMANCellcycleexitandneuronaldifferentiationprotein1OS=HomosapiensGN=CEND1PE=1SV=1;tr|B2R7I3|B2R7I3_HUMANcDNA,FLJ93454,highlysimilartoHomosapiensBM88antigen(BM88),mRNAOS=HomosapiensPE=2SV=1	sp|Q8N111|CEND_HUMAN Cell cycle exit and neuronal differentiation protein 1 OS=Homo sapiens GN=CEND1 PE=1 SV=1;tr|B2R7I3|B2R7I3_HUMAN cDNA, FLJ93454, highly similar to Homo sapiens BM88 antigen (BM88), mRNA OS=Homo sapiens PE=2 SV=1	3273000	19107000	17083000	12483000	9314500	35586000	6823300	3669500	2	6	6	6	6	6	6	6	5	6	6	6	6	6	6	6	5	14.954	0	41.977	By MS/MS	By MS/MS	By MS/MS	By MS/MS	By MS/MS	By MS/MS	By MS/MS	By MS/MS	54.4	54.4	54.4	54.4	54.4	54.4	54.4	34.9	19638000	114640000	102500000	74898000
tr|B7Z3E3|B7Z3E3_HUMANReticulonOS=HomosapiensPE=2SV=1;sp|O95197-7|RTN3_HUMANIsoform7ofReticulon-3OS=HomosapiensGN=RTN3;sp|O95197-2|RTN3_HUMANIsoform2ofReticulon-3OS=HomosapiensGN=RTN3;tr|B7Z8W8|B7Z8W8_HUMANReticulonOS=HomosapiensPE=2SV=1;sp|O95197|RTN3_HUMANReticulon-3OS=HomosapiensGN=RTN3PE=1SV=2;sp|O95197-4|RTN3_HUMANIsoform4ofReticulon-3OS=HomosapiensGN=RTN3;tr|B7Z361|B7Z361_HUMANReticulonOS=H…	tr|B7Z3E3|B7Z3E3_HUMAN Reticulon OS=Homo sapiens PE=2 SV=1;sp|O95197-7|RTN3_HUMAN Isoform 7 of Reticulon-3 OS=Homo sapiens GN=RTN3;sp|O95197-2|RTN3_HUMAN Isoform 2 of Reticulon-3 OS=Homo sapiens GN=RTN3;tr|B7Z8W8|B7Z8W8_HUMAN Reticulon OS=Homo sapiens PE=2	3268500	1648700	4010900	6040400	607430	7929900	1678100	949110	11	7	7	10	10	10	14	14	6	4	4	6	7	7	11	11	3	100.82	0	72.415	By MS/MS	By MS/MS	By MS/MS	By MS/MS	By MS/MS	By MS/MS	By MS/MS	By MS/MS	14.3	8.3	17	19.6	16.7	26.4	24.9	10	140550000	70894000	172470000	259740000
sp|P10114|RAP2A_HUMANRas-relatedproteinRap-2aOS=HomosapiensGN=RAP2APE=1SV=1;tr|F6U784|F6U784_HUMANRas-relatedproteinRap-2aOS=HomosapiensGN=RAP2APE=4SV=1	sp|P10114|RAP2A_HUMAN Ras-related protein Rap-2a OS=Homo sapiens GN=RAP2A PE=1 SV=1	3236400	17559000	9239800	11724000	5212100	19122000	5162500	6014200	2	14	14	13	14	12	16	13	11	10	9	8	10	7	10	8	6	20.615	0	119.01	By MS/MS	By MS/MS	By MS/MS	By MS/MS	By MS/MS	By MS/MS	By MS/MS	By MS/MS	51.4	65.6	57.9	51.4	55.7	78.7	65.6	49.2	38836000	210700000	110880000	140680000
sp|P19367-4|HXK1_HUMANIsoform4ofHexokinase-1OS=HomosapiensGN=HK1;tr|B4DG62|B4DG62_HUMANcDNAFLJ56506,highlysimilartoHexokinase-1(EC2.7.1.1)OS=HomosapiensPE=2SV=1;sp|P19367-2|HXK1_HUMANIsoform2ofHexokinase-1OS=HomosapiensGN=HK1;tr|A8K7J7|A8K7J7_HUMANcDNAFLJ78173,highlysimilartoHomosapienshexokinase1(HK1)mRNAOS=HomosapiensPE=2SV=1;sp|P19367|HXK1_HUMANHexokinase-1OS=HomosapiensGN=HK1PE=1SV=3;tr|A0A02…	sp|P19367-4|HXK1_HUMAN Isoform 4 of Hexokinase-1 OS=Homo sapiens GN=HK1;tr|B4DG62|B4DG62_HUMAN cDNA FLJ56506, highly similar to Hexokinase-1 (EC 2.7.1.1) OS=Homo sapiens PE=2 SV=1;sp|P19367-2|HXK1_HUMAN Isoform 2 of Hexokinase-1 OS=Homo sapiens GN=HK1;tr|A	3234500	6936000	7027600	15356000	2213000	17505000	4214700	2214400	25	39	37	38	44	33	40	39	30	39	37	38	44	33	40	39	30	101.08	0	245.69	By MS/MS	By MS/MS	By MS/MS	By MS/MS	By MS/MS	By MS/MS	By MS/MS	By MS/MS	45.6	41.5	43.2	47.1	38.1	44.2	44.6	35.4	155250000	332930000	337320000	737100000
sp|Q00610-2|CLH1_HUMANIsoform2ofClathrinheavychain1OS=HomosapiensGN=CLTC;sp|Q00610|CLH1_HUMANClathrinheavychain1OS=HomosapiensGN=CLTCPE=1SV=5;tr|A0A087WVQ6|A0A087WVQ6_HUMANClathrinheavychainOS=HomosapiensGN=CLTCPE=1SV=1;tr|J3KS13|J3KS13_HUMANClathrinheavychain1OS=HomosapiensGN=CLTCPE=1SV=1;tr|K7EJJ5|K7EJJ5_HUMANClathrinheavychain1(Fragment)OS=HomosapiensGN=CLTCPE=1SV=1;tr|J3KSQ2|J3KSQ2_HUMANClath…	sp|Q00610-2|CLH1_HUMAN Isoform 2 of Clathrin heavy chain 1 OS=Homo sapiens GN=CLTC;sp|Q00610|CLH1_HUMAN Clathrin heavy chain 1 OS=Homo sapiens GN=CLTC PE=1 SV=5;tr|A0A087WVQ6|A0A087WVQ6_HUMAN Clathrin heavy chain OS=Homo sapiens GN=CLTC PE=1 SV=1	3169700	7677300	8471300	11729000	1707000	13268000	3638300	3246500	14	82	71	69	84	51	79	65	45	63	55	53	64	40	61	52	34	187.89	0	323.31	By MS/MS	By MS/MS	By MS/MS	By MS/MS	By MS/MS	By MS/MS	By MS/MS	By MS/MS	50.6	45.5	44.4	52.8	36.4	53.8	46.1	31.8	288440000	698630000	770890000	1067300000
tr|V9HWC2|V9HWC2_HUMANEpididymissecretoryspermbindingproteinLi67pOS=HomosapiensGN=HEL-S-67pPE=2SV=1;sp|Q99497|PARK7_HUMANProteinDJ-1OS=HomosapiensGN=PARK7PE=1SV=2;tr|K7ELW0|K7ELW0_HUMANProteinDJ-1OS=HomosapiensGN=PARK7PE=1SV=1;tr|K7EN27|K7EN27_HUMANProteinDJ-1(Fragment)OS=HomosapiensGN=PARK7PE=1SV=1	tr|V9HWC2|V9HWC2_HUMAN Epididymis secretory sperm binding protein Li 67p OS=Homo sapiens GN=HEL-S-67p PE=2 SV=1;sp|Q99497|PARK7_HUMAN Protein DJ-1 OS=Homo sapiens GN=PARK7 PE=1 SV=2;tr|K7ELW0|K7ELW0_HUMAN Protein DJ-1 OS=Homo sapiens GN=PARK7 PE=1 SV=1;tr|	3143800	2417300	2867200	4764400	542100	5837800	4678100	8859100	4	10	7	6	9	7	8	8	9	10	7	6	9	7	8	8	9	19.891	0	32.362	By MS/MS	By MS/MS	By MS/MS	By MS/MS	By MS/MS	By MS/MS	By MS/MS	By MS/MS	60.3	39.7	38.1	58.7	44.4	51.9	52.4	64.6	37725000	29007000	34407000	57172000
sp|P16152|CBR1_HUMANCarbonylreductase[NADPH]1OS=HomosapiensGN=CBR1PE=1SV=3;sp|P16152-2|CBR1_HUMANIsoform2ofCarbonylreductase[NADPH]1OS=HomosapiensGN=CBR1;tr|E9PQ63|E9PQ63_HUMANCarbonylreductase[NADPH]1OS=HomosapiensGN=CBR1PE=1SV=1;tr|A8MTM1|A8MTM1_HUMANCarbonylreductase[NADPH]1OS=HomosapiensGN=CBR1PE=1SV=1	sp|P16152|CBR1_HUMAN Carbonyl reductase [NADPH] 1 OS=Homo sapiens GN=CBR1 PE=1 SV=3;sp|P16152-2|CBR1_HUMAN Isoform 2 of Carbonyl reductase [NADPH] 1 OS=Homo sapiens GN=CBR1;tr|E9PQ63|E9PQ63_HUMAN Carbonyl reductase [NADPH] 1 OS=Homo sapiens GN=CBR1 PE=1 SV	3131200	2013800	2770500	4351900	570930	2972900	2325700	10250000	4	11	9	9	11	5	8	10	10	9	7	7	9	4	6	8	8	30.375	0	128.05	By MS/MS	By MS/MS	By MS/MS	By MS/MS	By MS/MS	By MS/MS	By MS/MS	By MS/MS	56.7	40.4	40.4	56.7	22.4	43.3	51.3	46.6	53230000	34234000	47098000	73982000
sp|Q9Y277-2|VDAC3_HUMANIsoform2ofVoltage-dependentanion-selectivechannelprotein3OS=HomosapiensGN=VDAC3;sp|Q9Y277|VDAC3_HUMANVoltage-dependentanion-selectivechannelprotein3OS=HomosapiensGN=VDAC3PE=1SV=1;tr|E5RFP6|E5RFP6_HUMANVoltage-dependentanion-selectivechannelprotein3OS=HomosapiensGN=VDAC3PE=1SV=1;tr|E5RJN6|E5RJN6_HUMANVoltage-dependentanion-selectivechannelprotein3(Fragment)OS=HomosapiensGN=V…	sp|Q9Y277-2|VDAC3_HUMAN Isoform 2 of Voltage-dependent anion-selective channel protein 3 OS=Homo sapiens GN=VDAC3;sp|Q9Y277|VDAC3_HUMAN Voltage-dependent anion-selective channel protein 3 OS=Homo sapiens GN=VDAC3 PE=1 SV=1;tr|E5RFP6|E5RFP6_HUMAN Voltage-de	3112700	6994500	6363400	12126000	1739200	11991000	1938200	715740	8	11	12	10	12	10	15	11	5	11	12	10	12	10	15	11	5	30.789	0	98.43	By MS/MS	By MS/MS	By MS/MS	By MS/MS	By MS/MS	By MS/MS	By MS/MS	By MS/MS	51.1	51.8	45.1	51.8	45.1	59.2	44.7	22.2	43578000	97923000	89088000	169770000
tr|B7Z6B3|B7Z6B3_HUMANReceptorexpression-enhancingproteinOS=HomosapiensPE=2SV=1;sp|Q00765|REEP5_HUMANReceptorexpression-enhancingprotein5OS=HomosapiensGN=REEP5PE=1SV=3;tr|B7Z2A3|B7Z2A3_HUMANReceptorexpression-enhancingproteinOS=HomosapiensPE=2SV=1;tr|B2R6C4|B2R6C4_HUMANReceptorexpression-enhancingproteinOS=HomosapiensPE=2SV=1;tr|E2QRG8|E2QRG8_HUMANReceptorexpression-enhancingprotein(Fragment)OS=H…	tr|B7Z6B3|B7Z6B3_HUMAN Receptor expression-enhancing protein OS=Homo sapiens PE=2 SV=1;sp|Q00765|REEP5_HUMAN Receptor expression-enhancing protein 5 OS=Homo sapiens GN=REEP5 PE=1 SV=3;tr|B7Z2A3|B7Z2A3_HUMAN Receptor expression-enhancing protein OS=Homo sap	3099500	9296600	9054900	6896900	3378900	10954000	791320	530080	9	6	7	7	6	6	7	5	3	6	7	7	6	6	7	5	3	17.758	0	11.111	By MS/MS	By MS/MS	By MS/MS	By MS/MS	By MS/MS	By MS/MS	By MS/MS	By MS/MS	18.6	25	25	18.6	25	25	24.4	17.9	15497000	46483000	45274000	34484000
tr|A0A024R7D2|A0A024R7D2_HUMANSolutecarrierfamily44,member2,isoformCRA_aOS=HomosapiensGN=SLC44A2PE=3SV=1	tr|A0A024R7D2|A0A024R7D2_HUMAN Solute carrier family 44, member 2, isoform CRA_a OS=Homo sapiens GN=SLC44A2 PE=3 SV=1	3026200	5777700	4048200	6432400	596270	7434300	1198100	1468500	1	20	19	17	21	9	21	14	11	0	0	0	0	0	0	0	0	80.151	0	67.474	By MS/MS	By MS/MS	By MS/MS	By MS/MS	By MS/MS	By MS/MS	By MS/MS	By MS/MS	29.6	26.6	23.8	29.9	12.5	28.5	21.5	13.6	87761000	167550000	117400000	186540000
tr|B3KUZ8|B3KUZ8_HUMANAspartateaminotransferaseOS=HomosapiensPE=2SV=1;tr|A0A024R6W0|A0A024R6W0_HUMANAspartateaminotransferaseOS=HomosapiensGN=GOT2PE=4SV=1;sp|P00505|AATM_HUMANAspartateaminotransferase,mitochondrialOS=HomosapiensGN=GOT2PE=1SV=3;sp|P00505-2|AATM_HUMANIsoform2ofAspartateaminotransferase,mitochondrialOS=HomosapiensGN=GOT2;tr|B4DY39|B4DY39_HUMANcDNAFLJ54203,highlysimilartoAspartateami…	tr|B3KUZ8|B3KUZ8_HUMAN Aspartate aminotransferase OS=Homo sapiens PE=2 SV=1;tr|A0A024R6W0|A0A024R6W0_HUMAN Aspartate aminotransferase OS=Homo sapiens GN=GOT2 PE=4 SV=1;sp|P00505|AATM_HUMAN Aspartate aminotransferase, mitochondrial OS=Homo sapiens GN=GOT2 P	3019400	3277000	3812700	7487200	806740	9065200	4187700	2443600	5	18	15	14	17	11	16	18	16	3	3	3	2	3	2	3	2	41.326	0	156.79	By MS/MS	By MS/MS	By MS/MS	By MS/MS	By MS/MS	By MS/MS	By MS/MS	By MS/MS	59	44.2	41.8	60.4	28	49.6	55	45.3	69446000	75372000	87692000	172210000
tr|Q0KKI6|Q0KKI6_HUMANImmunoblobulinlightchain(Fragment)OS=HomosapiensPE=1SV=1;tr|Q8TCD0|Q8TCD0_HUMANUncharacterizedproteinOS=HomosapiensPE=1SV=1;sp|P01834|IGKC_HUMANImmunoglobulinkappaconstantOS=HomosapiensGN=IGKCPE=1SV=2;tr|Q5EFE6|Q5EFE6_HUMANAnti-RhDmonoclonalT125kappalightchainOS=HomosapiensPE=2SV=1;tr|V9HW34|V9HW34_HUMANEpididymisluminalprotein213OS=HomosapiensGN=HEL-213PE=2SV=1;tr|Q6PJF2|Q6…	tr|Q0KKI6|Q0KKI6_HUMAN Immunoblobulin light chain (Fragment) OS=Homo sapiens PE=1 SV=1;tr|Q8TCD0|Q8TCD0_HUMAN Uncharacterized protein OS=Homo sapiens PE=1 SV=1;sp|P01834|IGKC_HUMAN Immunoglobulin kappa constant OS=Homo sapiens GN=IGKC PE=1 SV=2;tr|Q5EFE6|Q	2994000	6204800	1899500	2063300	575330	580020	510270	66616	39	5	4	3	5	2	2	3	1	5	4	3	5	2	2	3	1	24.03	0	38.754	By MS/MS	By MS/MS	By MS/MS	By MS/MS	By MS/MS	By MS/MS	By MS/MS	By matching	44.7	29.2	23.3	44.7	15.1	16	23.3	7.8	35928000	74458000	22794000	24760000
sp|Q16799|RTN1_HUMANReticulon-1OS=HomosapiensGN=RTN1PE=1SV=1;tr|Q2NKQ5|Q2NKQ5_HUMANReticulonOS=HomosapiensGN=RTN1PE=1SV=1;sp|Q16799-2|RTN1_HUMANIsoformRTN1-BofReticulon-1OS=HomosapiensGN=RTN1;tr|B7Z4K5|B7Z4K5_HUMANReticulonOS=HomosapiensPE=2SV=1;tr|A8MT72|A8MT72_HUMANReticulonOS=HomosapiensGN=RTN1PE=1SV=1;tr|Q2L7A7|Q2L7A7_HUMANReticulon1isoformA(Fragment)OS=HomosapiensGN=RTN1PE=2SV=1	sp|Q16799|RTN1_HUMAN Reticulon-1 OS=Homo sapiens GN=RTN1 PE=1 SV=1;tr|Q2NKQ5|Q2NKQ5_HUMAN Reticulon OS=Homo sapiens GN=RTN1 PE=1 SV=1	2974500	7028400	7296000	8109900	3343200	10359000	2694100	2914900	6	17	15	15	19	10	16	17	11	14	12	12	15	6	13	13	7	83.617	0	102.31	By MS/MS	By MS/MS	By MS/MS	By MS/MS	By MS/MS	By MS/MS	By MS/MS	By MS/MS	35.3	27.3	27.3	37.9	16.9	30.3	34.3	19.6	89235000	210850000	218880000	243300000
tr|V9HWG2|V9HWG2_HUMANEpididymisluminalprotein30OS=HomosapiensGN=HEL30PE=2SV=1;sp|Q9Y2S2|CRYL1_HUMANLambda-crystallinhomologOS=HomosapiensGN=CRYL1PE=1SV=3;tr|A0A024RDM2|A0A024RDM2_HUMANCrystallin,lambda1,isoformCRA_aOS=HomosapiensGN=CRYL1PE=4SV=1;sp|Q9Y2S2-2|CRYL1_HUMANIsoform2ofLambda-crystallinhomologOS=HomosapiensGN=CRYL1;tr|A0A087WW38|A0A087WW38_HUMANLambda-crystallinhomolog(Fragment)OS=Homos…	tr|V9HWG2|V9HWG2_HUMAN Epididymis luminal protein 30 OS=Homo sapiens GN=HEL30 PE=2 SV=1;sp|Q9Y2S2|CRYL1_HUMAN Lambda-crystallin homolog OS=Homo sapiens GN=CRYL1 PE=1 SV=3;tr|A0A024RDM2|A0A024RDM2_HUMAN Crystallin, lambda 1, isoform CRA_a OS=Homo sapiens GN	2957400	1085500	1011800	1908800	263960	1022100	343550	792010	6	13	10	10	10	4	7	5	5	13	10	10	10	4	7	5	5	35.419	0	30.301	By MS/MS	By MS/MS	By MS/MS	By MS/MS	By MS/MS	By MS/MS	By MS/MS	By MS/MS	56.1	40.4	42.9	43.6	14.7	32.6	24.5	24.1	47319000	17368000	16188000	30541000
tr|A0A140VK69|A0A140VK69_HUMANAspartateaminotransferaseOS=HomosapiensPE=2SV=1;sp|P17174|AATC_HUMANAspartateaminotransferase,cytoplasmicOS=HomosapiensGN=GOT1PE=1SV=3;tr|Q2TU84|Q2TU84_HUMANAspartateaminotransferaseOS=HomosapiensGN=GIG18PE=2SV=1;tr|B7Z1I2|B7Z1I2_HUMANAspartateaminotransferaseOS=HomosapiensPE=2SV=1;sp|P17174-2|AATC_HUMANIsoform2ofAspartateaminotransferase,cytoplasmicOS=HomosapiensGN=…	tr|A0A140VK69|A0A140VK69_HUMAN Aspartate aminotransferase OS=Homo sapiens PE=2 SV=1;sp|P17174|AATC_HUMAN Aspartate aminotransferase, cytoplasmic OS=Homo sapiens GN=GOT1 PE=1 SV=3;tr|Q2TU84|Q2TU84_HUMAN Aspartate aminotransferase OS=Homo sapiens GN=GIG18 PE	2930100	4233500	4708700	5327100	1830900	7795000	4299600	6403400	5	21	17	17	19	13	17	17	15	21	17	17	19	13	17	17	15	46.247	0	69.769	By MS/MS	By MS/MS	By MS/MS	By MS/MS	By MS/MS	By MS/MS	By MS/MS	By MS/MS	61.5	53.5	49.6	59.1	35.4	52.1	57.9	49.6	64462000	93137000	103590000	117200000
tr|B7Z242|B7Z242_HUMANAmineoxidaseOS=HomosapiensPE=2SV=1;sp|P27338|AOFB_HUMANAmineoxidase[flavin-containing]BOS=HomosapiensGN=MAOBPE=1SV=3;tr|Q8TBI1|Q8TBI1_HUMANAmineoxidaseOS=HomosapiensGN=MAOBPE=2SV=1;sp|P27338-2|AOFB_HUMANIsoform2ofAmineoxidase[flavin-containing]BOS=HomosapiensGN=MAOB	tr|B7Z242|B7Z242_HUMAN Amine oxidase OS=Homo sapiens PE=2 SV=1;sp|P27338|AOFB_HUMAN Amine oxidase [flavin-containing] B OS=Homo sapiens GN=MAOB PE=1 SV=3;tr|Q8TBI1|Q8TBI1_HUMAN Amine oxidase OS=Homo sapiens GN=MAOB PE=2 SV=1;sp|P27338-2|AOFB_HUMAN Isoform	2917800	1749600	2420800	3285900	662320	3654700	1230000	644170	4	18	12	12	18	10	13	11	9	16	10	10	16	8	11	9	7	57.258	0	56.986	By MS/MS	By MS/MS	By MS/MS	By MS/MS	By MS/MS	By MS/MS	By MS/MS	By MS/MS	42.5	27.8	27.8	42.7	17.7	28.2	24.6	16.1	81699000	48988000	67782000	92005000
tr|Q59GA0|Q59GA0_HUMANThy-1cellsurfaceantigenvariant(Fragment)OS=HomosapiensPE=2SV=1;tr|E9PIM6|E9PIM6_HUMANThy-1membraneglycoprotein(Fragment)OS=HomosapiensGN=THY1PE=1SV=8;tr|B0YJA4|B0YJA4_HUMANThy-1cellsurfaceantigen,isoformCRA_aOS=HomosapiensGN=THY1PE=2SV=1;sp|P04216|THY1_HUMANThy-1membraneglycoproteinOS=HomosapiensGN=THY1PE=1SV=2;tr|E9PNQ8|E9PNQ8_HUMANThy-1membraneglycoprotein(Fragment)OS=Homo…	tr|Q59GA0|Q59GA0_HUMAN Thy-1 cell surface antigen variant (Fragment) OS=Homo sapiens PE=2 SV=1;tr|E9PIM6|E9PIM6_HUMAN Thy-1 membrane glycoprotein (Fragment) OS=Homo sapiens GN=THY1 PE=1 SV=8;tr|B0YJA4|B0YJA4_HUMAN Thy-1 cell surface antigen, isoform CRA_a	2835700	5395000	5395600	11395000	312990	13739000	1224300	288860	6	3	3	3	4	2	4	3	2	3	3	3	4	2	4	3	2	15.904	0	42.765	By MS/MS	By MS/MS	By MS/MS	By MS/MS	By MS/MS	By MS/MS	By MS/MS	By MS/MS	26.9	26.9	26.9	27.6	16.6	27.6	26.9	16.6	22686000	43160000	43164000	91162000
tr|V9HW26|V9HW26_HUMANATPsynthasesubunitalphaOS=HomosapiensGN=HEL-S-123mPE=1SV=1;sp|P25705|ATPA_HUMANATPsynthasesubunitalpha,mitochondrialOS=HomosapiensGN=ATP5A1PE=1SV=1;sp|P25705-2|ATPA_HUMANIsoform2ofATPsynthasesubunitalpha,mitochondrialOS=HomosapiensGN=ATP5A1;sp|P25705-3|ATPA_HUMANIsoform3ofATPsynthasesubunitalpha,mitochondrialOS=HomosapiensGN=ATP5A1;tr|K7EK77|K7EK77_HUMANATPsynthasesubunitalp…	tr|V9HW26|V9HW26_HUMAN ATP synthase subunit alpha OS=Homo sapiens GN=HEL-S-123m PE=1 SV=1;sp|P25705|ATPA_HUMAN ATP synthase subunit alpha, mitochondrial OS=Homo sapiens GN=ATP5A1 PE=1 SV=1;sp|P25705-2|ATPA_HUMAN Isoform 2 of ATP synthase subunit alpha, mit	2822100	3619800	8095900	9681800	2261200	15149000	3769200	1772800	11	24	22	22	25	17	24	22	17	24	22	22	25	17	24	22	17	59.75	0	127.99	By MS/MS	By MS/MS	By MS/MS	By MS/MS	By MS/MS	By MS/MS	By MS/MS	By MS/MS	51.4	45	43	55.2	33.1	46.1	44.5	35.6	87486000	112210000	250970000	300130000
sp|O00154-4|BACH_HUMANIsoform4ofCytosolicacylcoenzymeAthioesterhydrolaseOS=HomosapiensGN=ACOT7;sp|O00154-6|BACH_HUMANIsoform6ofCytosolicacylcoenzymeAthioesterhydrolaseOS=HomosapiensGN=ACOT7;sp|O00154-7|BACH_HUMANIsoform7ofCytosolicacylcoenzymeAthioesterhydrolaseOS=HomosapiensGN=ACOT7;sp|O00154|BACH_HUMANCytosolicacylcoenzymeAthioesterhydrolaseOS=HomosapiensGN=ACOT7PE=1SV=3;sp|O00154-5|BACH_HUMANI…	sp|O00154-4|BACH_HUMAN Isoform 4 of Cytosolic acyl coenzyme A thioester hydrolase OS=Homo sapiens GN=ACOT7;sp|O00154-6|BACH_HUMAN Isoform 6 of Cytosolic acyl coenzyme A thioester hydrolase OS=Homo sapiens GN=ACOT7;sp|O00154-7|BACH_HUMAN Isoform 7 of Cytoso	2816100	9269200	7079700	5908300	3301900	7037000	870550	1363300	11	17	15	15	18	13	17	14	10	17	15	15	18	13	17	14	10	37.419	0	58.664	By MS/MS	By MS/MS	By MS/MS	By MS/MS	By MS/MS	By MS/MS	By MS/MS	By MS/MS	53	46.7	46.7	53.3	42.9	53	48.5	32	50689000	166850000	127430000	106350000
tr|A0A140VJJ2|A0A140VJJ2_HUMANS-formylglutathionehydrolaseOS=HomosapiensGN=ESDPE=2SV=1;sp|P10768|ESTD_HUMANS-formylglutathionehydrolaseOS=HomosapiensGN=ESDPE=1SV=2;tr|X6RA14|X6RA14_HUMANS-formylglutathionehydrolaseOS=HomosapiensGN=ESDPE=1SV=1;tr|H7BZT7|H7BZT7_HUMANS-formylglutathionehydrolase(Fragment)OS=HomosapiensGN=ESDPE=1SV=1;tr|U3KQT1|U3KQT1_HUMANS-formylglutathionehydrolase(Fragment)OS=Homo…	tr|A0A140VJJ2|A0A140VJJ2_HUMAN S-formylglutathione hydrolase OS=Homo sapiens GN=ESD PE=2 SV=1;sp|P10768|ESTD_HUMAN S-formylglutathione hydrolase OS=Homo sapiens GN=ESD PE=1 SV=2;tr|X6RA14|X6RA14_HUMAN S-formylglutathione hydrolase OS=Homo sapiens GN=ESD PE	2813200	1015000	2456900	3787100	902630	3485000	1448400	2413600	5	10	7	8	10	7	8	7	6	10	7	8	10	7	8	7	6	31.462	0	33.744	By MS/MS	By MS/MS	By MS/MS	By MS/MS	By MS/MS	By MS/MS	By MS/MS	By MS/MS	46.8	25.2	31.6	45	23.8	31.6	31.2	28.7	39385000	14211000	34396000	53019000
tr|B4DMF5|B4DMF5_HUMANGlutamatedehydrogenaseOS=HomosapiensPE=2SV=1;tr|E9KL48|E9KL48_HUMANEpididymistissuespermbindingproteinLi18mPOS=HomosapiensGN=GLUD1PE=2SV=1;sp|P00367|DHE3_HUMANGlutamatedehydrogenase1,mitochondrialOS=HomosapiensGN=GLUD1PE=1SV=2;tr|Q53GW3|Q53GW3_HUMANGlutamatedehydrogenase1variant(Fragment)OS=HomosapiensPE=2SV=1;tr|B4DMG8|B4DMG8_HUMANGlutamatedehydrogenaseOS=HomosapiensPE=2SV=…	tr|B4DMF5|B4DMF5_HUMAN Glutamate dehydrogenase OS=Homo sapiens PE=2 SV=1;tr|E9KL48|E9KL48_HUMAN Epididymis tissue sperm binding protein Li 18mP OS=Homo sapiens GN=GLUD1 PE=2 SV=1;sp|P00367|DHE3_HUMAN Glutamate dehydrogenase 1, mitochondrial OS=Homo sapiens	2798600	1351600	3651500	6127500	494440	6677000	2121300	1287100	14	21	14	15	20	10	19	17	14	10	6	8	10	5	8	8	6	56.603	0	120.13	By MS/MS	By MS/MS	By MS/MS	By MS/MS	By MS/MS	By MS/MS	By MS/MS	By MS/MS	54.4	36.9	39.7	51.7	23	47	42.6	36.1	83959000	40548000	109540000	183830000
tr|Q6LET0|Q6LET0_HUMANTetraspanin(Fragment)OS=HomosapiensGN=KAI1PE=2SV=1;sp|P27701|CD82_HUMANCD82antigenOS=HomosapiensGN=CD82PE=1SV=1;sp|P27701-2|CD82_HUMANIsoform2ofCD82antigenOS=HomosapiensGN=CD82;tr|E9PJC7|E9PJC7_HUMANTetraspanin(Fragment)OS=HomosapiensGN=CD82PE=1SV=1;tr|H0YD57|H0YD57_HUMANCD82antigen(Fragment)OS=HomosapiensGN=CD82PE=1SV=1;tr|E9PP61|E9PP61_HUMANCD82antigen(Fragment)OS=Homosapi…	tr|Q6LET0|Q6LET0_HUMAN Tetraspanin (Fragment) OS=Homo sapiens GN=KAI1 PE=2 SV=1;sp|P27701|CD82_HUMAN CD82 antigen OS=Homo sapiens GN=CD82 PE=1 SV=1;sp|P27701-2|CD82_HUMAN Isoform 2 of CD82 antigen OS=Homo sapiens GN=CD82;tr|E9PJC7|E9PJC7_HUMAN Tetraspanin	2796700	1028400	1968300	2049600	242180	3075700	802260	9481800	10	6	6	6	6	2	6	6	7	6	6	6	6	2	6	6	7	29.643	0	32.541	By MS/MS	By MS/MS	By MS/MS	By MS/MS	By MS/MS	By MS/MS	By MS/MS	By MS/MS	28.1	28.1	28.1	28.1	11.2	28.1	28.1	31.5	36357000	13369000	25587000	26645000
sp|O43175|SERA_HUMAND-3-phosphoglyceratedehydrogenaseOS=HomosapiensGN=PHGDHPE=1SV=4;tr|V9HW79|V9HW79_HUMAND-3-phosphoglyceratedehydrogenaseOS=HomosapiensGN=HEL-S-113PE=2SV=1;tr|Q5SZU1|Q5SZU1_HUMAND-3-phosphoglyceratedehydrogenaseOS=HomosapiensGN=PHGDHPE=1SV=1;tr|B3KSC3|B3KSC3_HUMANcDNAFLJ35987fis,cloneTESTI2014269,highlysimilartoD-3-phosphoglyceratedehydrogenase(EC1.1.1.95)OS=HomosapiensPE=2SV=1;…	sp|O43175|SERA_HUMAN D-3-phosphoglycerate dehydrogenase OS=Homo sapiens GN=PHGDH PE=1 SV=4;tr|V9HW79|V9HW79_HUMAN D-3-phosphoglycerate dehydrogenase OS=Homo sapiens GN=HEL-S-113 PE=2 SV=1;tr|Q5SZU1|Q5SZU1_HUMAN D-3-phosphoglycerate dehydrogenase OS=Homo sa	2780200	814890	1021400	1147600	260270	538580	692370	3829900	10	14	11	10	10	7	9	11	12	14	11	10	10	7	9	11	12	56.65	0	88.677	By MS/MS	By MS/MS	By MS/MS	By MS/MS	By MS/MS	By MS/MS	By MS/MS	By MS/MS	33.8	27.6	26.1	25.3	16.5	19.7	24.2	30.2	66726000	19557000	24513000	27543000
sp|Q7Z5G4|GOGA7_HUMANGolginsubfamilyAmember7OS=HomosapiensGN=GOLGA7PE=1SV=2;sp|Q7Z5G4-3|GOGA7_HUMANIsoform2ofGolginsubfamilyAmember7OS=HomosapiensGN=GOLGA7	sp|Q7Z5G4|GOGA7_HUMAN Golgin subfamily A member 7 OS=Homo sapiens GN=GOLGA7 PE=1 SV=2;sp|Q7Z5G4-3|GOGA7_HUMAN Isoform 2 of Golgin subfamily A member 7 OS=Homo sapiens GN=GOLGA7	2777600	1381800	5801400	3149200	1431300	2298700	802340	4027900	2	6	6	7	6	5	6	7	7	6	6	7	6	5	6	7	7	15.824	0	12.746	By MS/MS	By MS/MS	By MS/MS	By MS/MS	By MS/MS	By MS/MS	By MS/MS	By MS/MS	46	40.9	48.2	46	29.9	40.9	48.2	48.2	24999000	12437000	52213000	28343000
sp|Q969E2-2|SCAM4_HUMANIsoform2ofSecretorycarrier-associatedmembraneprotein4OS=HomosapiensGN=SCAMP4;sp|Q969E2|SCAM4_HUMANSecretorycarrier-associatedmembraneprotein4OS=HomosapiensGN=SCAMP4PE=1SV=1;tr|K7EJJ4|K7EJJ4_HUMANSecretorycarrier-associatedmembraneprotein(Fragment)OS=HomosapiensGN=SCAMP4PE=1SV=2;tr|C9JWM2|C9JWM2_HUMANSecretorycarrier-associatedmembraneprotein(Fragment)OS=HomosapiensGN=SCAMP4…	sp|Q969E2-2|SCAM4_HUMAN Isoform 2 of Secretory carrier-associated membrane protein 4 OS=Homo sapiens GN=SCAMP4;sp|Q969E2|SCAM4_HUMAN Secretory carrier-associated membrane protein 4 OS=Homo sapiens GN=SCAMP4 PE=1 SV=1	2707200	9164800	7568300	1037400	2395400	1629300	985270	1017600	5	3	2	2	3	2	2	1	1	3	2	2	3	2	2	1	1	22.047	0	18.415	By MS/MS	By MS/MS	By MS/MS	By MS/MS	By MS/MS	By MS/MS	By MS/MS	By MS/MS	26.2	11.8	11.8	26.2	11.8	20.5	6.2	5.6	13536000	45824000	37842000	5186900
sp|P08247|SYPH_HUMANSynaptophysinOS=HomosapiensGN=SYPPE=1SV=3;tr|H7C4W3|H7C4W3_HUMANSynaptophysin(Fragment)OS=HomosapiensGN=SYPPE=1SV=1;sp|P08247-2|SYPH_HUMANIsoform2ofSynaptophysinOS=HomosapiensGN=SYP;tr|G5E9A2|G5E9A2_HUMANSynaptophysinOS=HomosapiensGN=SYPPE=1SV=1;tr|F2Z3E1|F2Z3E1_HUMANSynaptophysinOS=HomosapiensGN=SYPPE=1SV=1	sp|P08247|SYPH_HUMAN Synaptophysin OS=Homo sapiens GN=SYP PE=1 SV=3;tr|H7C4W3|H7C4W3_HUMAN Synaptophysin (Fragment) OS=Homo sapiens GN=SYP PE=1 SV=1;sp|P08247-2|SYPH_HUMAN Isoform 2 of Synaptophysin OS=Homo sapiens GN=SYP	2701100	27814000	16745000	18618000	3281200	27339000	4300000	1302300	5	4	5	4	4	4	5	4	3	4	5	4	4	4	5	4	3	33.845	0	9.4363	By MS/MS	By MS/MS	By MS/MS	By MS/MS	By MS/MS	By MS/MS	By MS/MS	By MS/MS	13.4	15.3	13.4	13.4	13.4	15.3	13.4	10.2	29712000	305960000	184190000	204800000
sp|P19086|GNAZ_HUMANGuaninenucleotide-bindingproteinG(z)subunitalphaOS=HomosapiensGN=GNAZPE=2SV=3;tr|Q8IY73|Q8IY73_HUMANGuaninenucleotidebindingprotein(Gprotein),alphazpolypeptideOS=HomosapiensGN=GNAZPE=2SV=1;tr|B4DEJ3|B4DEJ3_HUMANcDNAFLJ51798,highlysimilartoGuaninenucleotide-bindingproteinG(z)subunitalphaOS=HomosapiensPE=2SV=1;tr|Q8N652|Q8N652_HUMANGuaninenucleotidebindingprotein(Gprotein),alpha…	sp|P19086|GNAZ_HUMAN Guanine nucleotide-binding protein G(z) subunit alpha OS=Homo sapiens GN=GNAZ PE=2 SV=3;tr|Q8IY73|Q8IY73_HUMAN Guanine nucleotide binding protein (G protein), alpha z polypeptide OS=Homo sapiens GN=GNAZ PE=2 SV=1;tr|B4DEJ3|B4DEJ3_HUMAN	2638200	2236900	1566400	5579500	460590	4331500	818870	848640	4	14	10	6	13	8	12	13	8	14	10	6	13	8	12	13	8	40.923	0	78.187	By MS/MS	By MS/MS	By MS/MS	By MS/MS	By MS/MS	By MS/MS	By MS/MS	By MS/MS	44.2	37.7	22.8	44.5	26.5	40.6	44.8	29	44850000	38028000	26630000	94851000
sp|O94819|KBTBB_HUMANKelchrepeatandBTBdomain-containingprotein11OS=HomosapiensGN=KBTBD11PE=1SV=1	sp|O94819|KBTBB_HUMAN Kelch repeat and BTB domain-containing protein 11 OS=Homo sapiens GN=KBTBD11 PE=1 SV=1	2631800	4526000	5278100	5414400	1054400	6165600	1147800	693330	1	28	25	24	27	20	23	18	12	28	25	24	27	20	23	18	12	65.719	0	125.38	By MS/MS	By MS/MS	By MS/MS	By MS/MS	By MS/MS	By MS/MS	By MS/MS	By MS/MS	50.6	43.3	41.3	50.4	36.3	42.2	31.8	22.2	71058000	122200000	142510000	146190000
tr|V9HW12|V9HW12_HUMANEpididymissecretoryspermbindingproteinLi2aOS=HomosapiensGN=HEL-S-2aPE=2SV=1;sp|P32119|PRDX2_HUMANPeroxiredoxin-2OS=HomosapiensGN=PRDX2PE=1SV=5;tr|B4DF70|B4DF70_HUMANcDNAFLJ60461,highlysimilartoPeroxiredoxin-2(EC1.11.1.15)OS=HomosapiensPE=2SV=1;tr|A6NIW5|A6NIW5_HUMANPeroxiredoxin2,isoformCRA_aOS=HomosapiensGN=PRDX2PE=1SV=2;tr|A0A024R7F2|A0A024R7F2_HUMANPeroxiredoxin2,isoformC…	tr|V9HW12|V9HW12_HUMAN Epididymis secretory sperm binding protein Li 2a OS=Homo sapiens GN=HEL-S-2a PE=2 SV=1;sp|P32119|PRDX2_HUMAN Peroxiredoxin-2 OS=Homo sapiens GN=PRDX2 PE=1 SV=5;tr|B4DF70|B4DF70_HUMAN cDNA FLJ60461, highly similar to Peroxiredoxin-2 (	2590800	4796100	4926700	7667100	1004900	6455100	5336500	10672000	6	12	10	10	12	9	11	11	10	11	9	9	11	8	10	10	9	21.892	0	21.821	By MS/MS	By MS/MS	By MS/MS	By MS/MS	By MS/MS	By MS/MS	By MS/MS	By MS/MS	56.1	38.9	38.9	56.1	38.9	56.1	56.1	38.9	33680000	62349000	64047000	99673000
tr|Q9P2Z7|Q9P2Z7_HUMANMajormyelinproteolipid(Fragment)OS=HomosapiensGN=PLPPE=4SV=1	tr|Q9P2Z7|Q9P2Z7_HUMAN Major myelin proteolipid (Fragment) OS=Homo sapiens GN=PLP PE=4 SV=1	2537200	5022000	11161000	3582900	4928400	3959800	0	0	1	4	4	4	4	4	4	3	2	1	1	1	1	1	1	0	0	8.9456	0.00050994	2.2979	By matching	By matching	By MS/MS	By matching	By MS/MS	By MS/MS	By matching	By matching	42.9	42.9	42.9	42.9	42.9	42.9	28.6	28.6	7611700	15066000	33482000	10749000
sp|P43003-2|EAA1_HUMANIsoform2ofExcitatoryaminoacidtransporter1OS=HomosapiensGN=SLC1A3;tr|Q8N169|Q8N169_HUMANAminoacidtransporterOS=HomosapiensGN=SLC1A3PE=2SV=1;tr|A0A024R050|A0A024R050_HUMANAminoacidtransporterOS=HomosapiensGN=SLC1A3PE=3SV=1;sp|P43003|EAA1_HUMANExcitatoryaminoacidtransporter1OS=HomosapiensGN=SLC1A3PE=1SV=1;tr|A0A087X0U3|A0A087X0U3_HUMANAminoacidtransporterOS=HomosapiensGN=SLC1A3…	sp|P43003-2|EAA1_HUMAN Isoform 2 of Excitatory amino acid transporter 1 OS=Homo sapiens GN=SLC1A3;tr|Q8N169|Q8N169_HUMAN Amino acid transporter OS=Homo sapiens GN=SLC1A3 PE=2 SV=1;tr|A0A024R050|A0A024R050_HUMAN Amino acid transporter OS=Homo sapiens GN=SLC	2516800	5823700	4040900	10816000	617010	18182000	760990	0	20	6	5	4	6	5	6	5	1	6	5	4	6	5	6	5	1	55.148	0	60.395	By MS/MS	By MS/MS	By MS/MS	By MS/MS	By MS/MS	By MS/MS	By MS/MS	By MS/MS	17.5	15.3	12.7	17.5	15.5	17.5	14.9	4.2	40269000	93180000	64654000	173060000
tr|K9JA46|K9JA46_HUMANEpididymisluminalsecretoryprotein52OS=HomosapiensGN=EL52PE=2SV=1;sp|P07900|HS90A_HUMANHeatshockproteinHSP90-alphaOS=HomosapiensGN=HSP90AA1PE=1SV=5;sp|P07900-2|HS90A_HUMANIsoform2ofHeatshockproteinHSP90-alphaOS=HomosapiensGN=HSP90AA1;tr|Q2VPJ6|Q2VPJ6_HUMANHSP90AA1protein(Fragment)OS=HomosapiensGN=HSP90AA1PE=2SV=1;tr|Q8TBA7|Q8TBA7_HUMANHSP90AA1protein(Fragment)OS=HomosapiensGN…	tr|K9JA46|K9JA46_HUMAN Epididymis luminal secretory protein 52 OS=Homo sapiens GN=EL52 PE=2 SV=1;sp|P07900|HS90A_HUMAN Heat shock protein HSP 90-alpha OS=Homo sapiens GN=HSP90AA1 PE=1 SV=5;sp|P07900-2|HS90A_HUMAN Isoform 2 of Heat shock protein HSP 90-alph	2475400	3372100	5284500	4456200	713230	4137600	875430	856640	14	22	18	20	23	14	18	16	14	14	10	11	14	9	12	11	10	84.659	0	73.392	By MS/MS	By MS/MS	By MS/MS	By MS/MS	By MS/MS	By MS/MS	By MS/MS	By MS/MS	31.8	26.5	29.1	33.3	19.8	25.3	24.3	20.9	81688000	111280000	174390000	147050000
sp|Q9UPR5|NAC2_HUMANSodium/calciumexchanger2OS=HomosapiensGN=SLC8A2PE=2SV=2;tr|F5H6L7|F5H6L7_HUMANSodium/calciumexchanger2OS=HomosapiensGN=SLC8A2PE=1SV=1;tr|Q9H021|Q9H021_HUMANUncharacterizedproteinDKFZp761D171(Fragment)OS=HomosapiensGN=DKFZp761D171PE=2SV=1;tr|B4DEZ4|B4DEZ4_HUMANcDNAFLJ58526,highlysimilartoSodium/calciumexchanger2OS=HomosapiensPE=2SV=1;tr|B4DE41|B4DE41_HUMANcDNAFLJ58522,highlysim…	sp|Q9UPR5|NAC2_HUMAN Sodium/calcium exchanger 2 OS=Homo sapiens GN=SLC8A2 PE=2 SV=2;tr|F5H6L7|F5H6L7_HUMAN Sodium/calcium exchanger 2 OS=Homo sapiens GN=SLC8A2 PE=1 SV=1;tr|Q9H021|Q9H021_HUMAN Uncharacterized protein DKFZp761D171 (Fragment) OS=Homo sapiens	2471000	4924800	6044300	10053000	842320	12093000	3643200	1183100	8	25	19	18	28	13	24	27	16	25	19	18	28	13	24	27	16	100.37	0	131.43	By MS/MS	By MS/MS	By MS/MS	By MS/MS	By MS/MS	By MS/MS	By MS/MS	By MS/MS	34.9	26.9	25.8	35.9	19.3	35.3	34.4	22.8	79073000	157590000	193420000	321710000
sp|Q9NQC3|RTN4_HUMANReticulon-4OS=HomosapiensGN=RTN4PE=1SV=2;sp|Q9NQC3-4|RTN4_HUMANIsoform4ofReticulon-4OS=HomosapiensGN=RTN4;sp|Q9NQC3-6|RTN4_HUMANIsoform6ofReticulon-4OS=HomosapiensGN=RTN4;tr|Q53RF4|Q53RF4_HUMANUncharacterizedproteinRTN4(Fragment)OS=HomosapiensGN=RTN4PE=4SV=1;tr|Q3LIF4|Q3LIF4_HUMANReticulon(Fragment)OS=HomosapiensGN=Nbla00271PE=2SV=1;sp|Q9NQC3-5|RTN4_HUMANIsoform5ofReticulon-4O…	sp|Q9NQC3|RTN4_HUMAN Reticulon-4 OS=Homo sapiens GN=RTN4 PE=1 SV=2;sp|Q9NQC3-4|RTN4_HUMAN Isoform 4 of Reticulon-4 OS=Homo sapiens GN=RTN4;sp|Q9NQC3-6|RTN4_HUMAN Isoform 6 of Reticulon-4 OS=Homo sapiens GN=RTN4;tr|Q53RF4|Q53RF4_HUMAN Uncharacterized protei	2449600	2045200	3744400	3806100	540960	3560900	550530	482970	14	28	14	18	28	9	18	14	11	18	8	10	18	3	11	9	7	129.93	0	123.1	By MS/MS	By MS/MS	By MS/MS	By MS/MS	By MS/MS	By MS/MS	By MS/MS	By MS/MS	46.9	17.1	25.9	42.7	10.9	27.7	17.2	14.7	110230000	92036000	168500000	171270000
sp|Q5VST6|AB17B_HUMANProteinABHD17BOS=HomosapiensGN=ABHD17BPE=1SV=1;sp|Q5VST6-2|AB17B_HUMANIsoform2ofProteinABHD17BOS=HomosapiensGN=ABHD17B	sp|Q5VST6|AB17B_HUMAN Protein ABHD17B OS=Homo sapiens GN=ABHD17B PE=1 SV=1;sp|Q5VST6-2|AB17B_HUMAN Isoform 2 of Protein ABHD17B OS=Homo sapiens GN=ABHD17B	2428200	1316000	2135100	2279200	378650	1948800	266870	270400	2	12	10	10	11	5	10	8	6	10	8	8	9	3	8	7	5	32.214	0	28.701	By MS/MS	By MS/MS	By MS/MS	By MS/MS	By MS/MS	By MS/MS	By MS/MS	By MS/MS	52.8	36.5	31.2	44.8	22.2	31.2	25.3	20.1	38851000	21056000	34161000	36468000
tr|A0A1L1UHR1|A0A1L1UHR1_HUMANSpermbindingprotein1aOS=HomosapiensPE=2SV=1;sp|P21796|VDAC1_HUMANVoltage-dependentanion-selectivechannelprotein1OS=HomosapiensGN=VDAC1PE=1SV=2;tr|B3KTS5|B3KTS5_HUMANcDNAFLJ38670fis,cloneHSYRA2000190,highlysimilartoVoltage-dependentanion-selectivechannelprotein1OS=HomosapiensPE=2SV=1;tr|C9JI87|C9JI87_HUMANVoltage-dependentanion-selectivechannelprotein1(Fragment)OS=Hom…	tr|A0A1L1UHR1|A0A1L1UHR1_HUMAN Sperm binding protein 1a OS=Homo sapiens PE=2 SV=1;sp|P21796|VDAC1_HUMAN Voltage-dependent anion-selective channel protein 1 OS=Homo sapiens GN=VDAC1 PE=1 SV=2;tr|B3KTS5|B3KTS5_HUMAN cDNA FLJ38670 fis, clone HSYRA2000190, hig	2422900	6594600	7205200	12092000	2372300	30709000	15105000	3113900	5	17	15	14	18	12	20	18	15	17	15	14	18	12	20	18	15	30.772	0	272.39	By MS/MS	By MS/MS	By MS/MS	By MS/MS	By MS/MS	By MS/MS	By MS/MS	By MS/MS	71.7	61.8	61.5	72.8	58	73.5	69.6	64.7	41190000	112110000	122490000	205570000
tr|V9HWB8|V9HWB8_HUMANPyruvatekinaseOS=HomosapiensGN=HEL-S-30PE=1SV=1;sp|P14618|KPYM_HUMANPyruvatekinasePKMOS=HomosapiensGN=PKMPE=1SV=4;sp|P14618-3|KPYM_HUMANIsoform3ofPyruvatekinasePKMOS=HomosapiensGN=PKM;tr|B4DNK4|B4DNK4_HUMANPyruvatekinaseOS=HomosapiensGN=PKMPE=1SV=1;tr|A0A024R609|A0A024R609_HUMANPyruvatekinaseOS=HomosapiensGN=PKM2PE=3SV=1;tr|Q8WUW7|Q8WUW7_HUMANPyruvatekinase(Fragment)OS=Homos…	tr|V9HWB8|V9HWB8_HUMAN Pyruvate kinase OS=Homo sapiens GN=HEL-S-30 PE=1 SV=1;sp|P14618|KPYM_HUMAN Pyruvate kinase PKM OS=Homo sapiens GN=PKM PE=1 SV=4;sp|P14618-3|KPYM_HUMAN Isoform 3 of Pyruvate kinase PKM OS=Homo sapiens GN=PKM;tr|B4DNK4|B4DNK4_HUMAN Pyr	2420100	335560	767860	2019000	159170	1623600	186990	186630	22	43	39	40	41	33	41	34	32	4	2	2	4	2	4	2	2	57.936	0	20.069	By MS/MS	By MS/MS	By MS/MS	By MS/MS	By MS/MS	By MS/MS	By MS/MS	By MS/MS	74.2	72.3	66.5	74.2	57.8	67.2	59.7	56.7	79864000	11073000	25339000	66628000
tr|A0A024R9E4|A0A024R9E4_HUMANMal,T-celldifferentiationprotein2,isoformCRA_aOS=HomosapiensGN=MAL2PE=4SV=1;sp|Q969L2|MAL2_HUMANProteinMAL2OS=HomosapiensGN=MAL2PE=1SV=1	tr|A0A024R9E4|A0A024R9E4_HUMAN Mal, T-cell differentiation protein 2, isoform CRA_a OS=Homo sapiens GN=MAL2 PE=4 SV=1;sp|Q969L2|MAL2_HUMAN Protein MAL2 OS=Homo sapiens GN=MAL2 PE=1 SV=1	2414900	13257000	9871300	10461000	331360	20310000	3073600	376260	2	1	1	1	1	1	1	1	1	1	1	1	1	1	1	1	1	19.125	0.00048828	2.042	By MS/MS	By MS/MS	By MS/MS	By MS/MS	By MS/MS	By MS/MS	By MS/MS	By matching	6.2	6.2	6.2	6.2	6.2	6.2	6.2	6.2	4829800	26515000	19743000	20922000
sp|Q01813|PFKAP_HUMANATP-dependent6-phosphofructokinase,platelettypeOS=HomosapiensGN=PFKPPE=1SV=2;sp|Q01813-2|PFKAP_HUMANIsoform2ofATP-dependent6-phosphofructokinase,platelettypeOS=HomosapiensGN=PFKP;tr|Q8WTZ9|Q8WTZ9_HUMANSimilartophosphofructokinase,platelet(Fragment)OS=HomosapiensPE=2SV=1;tr|O14943|O14943_HUMANPhosphofructokinase-P(Fragment)OS=HomosapiensGN=PFK-PPE=2SV=1;tr|B1APP6|B1APP6_HUMANA…	sp|Q01813|PFKAP_HUMAN ATP-dependent 6-phosphofructokinase, platelet type OS=Homo sapiens GN=PFKP PE=1 SV=2;sp|Q01813-2|PFKAP_HUMAN Isoform 2 of ATP-dependent 6-phosphofructokinase, platelet type OS=Homo sapiens GN=PFKP;tr|Q8WTZ9|Q8WTZ9_HUMAN Similar to pho	2396400	3928300	3542500	5156300	1056100	5847000	887350	1353900	12	30	26	28	30	21	27	20	19	28	24	26	28	18	25	18	17	85.595	0	303.62	By MS/MS	By MS/MS	By MS/MS	By MS/MS	By MS/MS	By MS/MS	By MS/MS	By MS/MS	44	36.1	37.4	42.5	25.9	42.2	29.2	24.2	76684000	125710000	113360000	165000000
tr|Q6GMV8|Q6GMV8_HUMANUncharacterizedproteinOS=HomosapiensPE=2SV=1;tr|Q8N355|Q8N355_HUMANIGL@proteinOS=HomosapiensGN=IGL@PE=1SV=1;tr|S6BGD6|S6BGD6_HUMANIgGLchainOS=HomosapiensPE=1SV=1;tr|Q6IN99|Q6IN99_HUMANIGL@proteinOS=HomosapiensGN=IGL@PE=2SV=1;tr|Q567P1|Q567P1_HUMANIGL@proteinOS=HomosapiensGN=IGL@PE=2SV=1;tr|Q8NEJ1|Q8NEJ1_HUMANUncharacterizedproteinOS=HomosapiensPE=2SV=1;tr|Q6GMX3|Q6GMX3_HUMAN…	tr|Q6GMV8|Q6GMV8_HUMAN Uncharacterized protein OS=Homo sapiens PE=2 SV=1;tr|Q8N355|Q8N355_HUMAN IGL@ protein OS=Homo sapiens GN=IGL@ PE=1 SV=1;tr|S6BGD6|S6BGD6_HUMAN IgG L chain OS=Homo sapiens PE=1 SV=1;tr|Q6IN99|Q6IN99_HUMAN IGL@ protein OS=Homo sapiens	2393600	2290700	853470	1406500	252710	592240	359430	859390	37	6	5	3	3	1	2	3	2	3	2	0	1	0	0	1	0	24.91	0	38.619	By MS/MS	By MS/MS	By MS/MS	By MS/MS	By MS/MS	By MS/MS	By MS/MS	By MS/MS	37.6	31.2	19.7	20.9	6.4	12.8	20.9	12.8	35904000	34361000	12802000	21097000
sp|Q9GZV7|HPLN2_HUMANHyaluronanandproteoglycanlinkprotein2OS=HomosapiensGN=HAPLN2PE=2SV=1;tr|B7Z1Z4|B7Z1Z4_HUMANcDNAFLJ54346,highlysimilartoHyaluronanandproteoglycanlinkprotein2OS=HomosapiensPE=2SV=1;tr|Q5T3J1|Q5T3J1_HUMANHyaluronanandproteoglycanlinkprotein2(Fragment)OS=HomosapiensGN=HAPLN2PE=1SV=1	sp|Q9GZV7|HPLN2_HUMAN Hyaluronan and proteoglycan link protein 2 OS=Homo sapiens GN=HAPLN2 PE=2 SV=1;tr|B7Z1Z4|B7Z1Z4_HUMAN cDNA FLJ54346, highly similar to Hyaluronan and proteoglycan link protein 2 OS=Homo sapiens PE=2 SV=1;tr|Q5T3J1|Q5T3J1_HUMAN Hyaluro	2366300	720090	3625100	1255000	382220	832060	2255500	4536800	3	12	8	8	11	7	8	9	9	12	8	8	11	7	8	9	9	37.775	0	30.859	By MS/MS	By MS/MS	By MS/MS	By MS/MS	By MS/MS	By MS/MS	By MS/MS	By MS/MS	36.8	26.2	29.4	35.9	22.9	26.8	29.4	29.4	47326000	14402000	72502000	25100000
tr|B4DVJ0|B4DVJ0_HUMANGlucose-6-phosphateisomeraseOS=HomosapiensPE=2SV=1	tr|B4DVJ0|B4DVJ0_HUMAN Glucose-6-phosphate isomerase OS=Homo sapiens PE=2 SV=1	2314000	3585800	3151900	4777000	1376200	3143100	792030	2547200	1	14	12	11	14	9	13	10	9	1	1	1	1	1	1	1	1	59.99	0	103.23	By MS/MS	By MS/MS	By MS/MS	By MS/MS	By MS/MS	By MS/MS	By MS/MS	By MS/MS	32.8	29.9	29.9	35	21.5	32.8	27.9	22.8	60165000	93232000	81950000	124200000
sp|P09382|LEG1_HUMANGalectin-1OS=HomosapiensGN=LGALS1PE=1SV=2;tr|F8WEI7|F8WEI7_HUMANGalectin-1OS=HomosapiensGN=LGALS1PE=1SV=1	sp|P09382|LEG1_HUMAN Galectin-1 OS=Homo sapiens GN=LGALS1 PE=1 SV=2	2294600	588250	1620900	2188500	568440	2809800	618430	1715200	2	7	4	5	6	5	4	5	5	7	4	5	6	5	4	5	5	14.716	0	25.165	By MS/MS	By MS/MS	By MS/MS	By MS/MS	By MS/MS	By MS/MS	By MS/MS	By MS/MS	64.4	35.6	41.5	58.5	41.5	34.1	46.7	46.7	20651000	5294200	14588000	19697000
tr|V9HWI5|V9HWI5_HUMANCofilin1(Non-muscle),isoformCRA_bOS=HomosapiensGN=HEL-S-15PE=2SV=1;sp|P23528|COF1_HUMANCofilin-1OS=HomosapiensGN=CFL1PE=1SV=3;tr|G3V1A4|G3V1A4_HUMANCofilin1(Non-muscle),isoformCRA_aOS=HomosapiensGN=CFL1PE=1SV=1;tr|E9PP50|E9PP50_HUMANCofilin-1(Fragment)OS=HomosapiensGN=CFL1PE=1SV=8;tr|E9PK25|E9PK25_HUMANCofilin-1OS=HomosapiensGN=CFL1PE=1SV=1;tr|E9PQB7|E9PQB7_HUMANCofilin-1(Fr…	tr|V9HWI5|V9HWI5_HUMAN Cofilin 1 (Non-muscle), isoform CRA_b OS=Homo sapiens GN=HEL-S-15 PE=2 SV=1;sp|P23528|COF1_HUMAN Cofilin-1 OS=Homo sapiens GN=CFL1 PE=1 SV=3;tr|G3V1A4|G3V1A4_HUMAN Cofilin 1 (Non-muscle), isoform CRA_a OS=Homo sapiens GN=CFL1 PE=1 SV	2266400	1883200	5074600	3412800	2416100	6834200	3545000	14656000	10	9	4	6	9	5	6	8	8	6	3	5	6	4	5	7	7	18.502	0	50.724	By MS/MS	By MS/MS	By MS/MS	By MS/MS	By MS/MS	By MS/MS	By MS/MS	By MS/MS	62.7	30.7	54.8	62.7	47.6	47.6	57.8	57.8	22664000	18832000	50746000	34128000
tr|Q6FHV6|Q6FHV6_HUMANENO2proteinOS=HomosapiensGN=ENO2PE=1SV=1;tr|A8K3B0|A8K3B0_HUMANcDNAFLJ77877,highlysimilartoHumanENO2neuronspecific(gamma)enolaseOS=HomosapiensPE=2SV=1;sp|P09104|ENOG_HUMANGamma-enolaseOS=HomosapiensGN=ENO2PE=1SV=3;sp|P09104-2|ENOG_HUMANIsoform2ofGamma-enolaseOS=HomosapiensGN=ENO2;tr|F5H0C8|F5H0C8_HUMANGamma-enolaseOS=HomosapiensGN=ENO2PE=1SV=1;tr|F5H1C3|F5H1C3_HUMANGamma-eno…	tr|Q6FHV6|Q6FHV6_HUMAN ENO2 protein OS=Homo sapiens GN=ENO2 PE=1 SV=1;tr|A8K3B0|A8K3B0_HUMAN cDNA FLJ77877, highly similar to Human ENO2 neuron specific (gamma) enolase OS=Homo sapiens PE=2 SV=1;sp|P09104|ENOG_HUMAN Gamma-enolase OS=Homo sapiens GN=ENO2 PE	2263100	4769800	5493400	4502200	968170	4169800	1765800	2323500	9	13	8	10	12	6	12	11	9	10	5	7	9	4	10	9	6	47.268	0	123.06	By MS/MS	By MS/MS	By MS/MS	By MS/MS	By MS/MS	By MS/MS	By MS/MS	By MS/MS	48.8	24.2	32.7	45.6	17.1	50.5	43.5	28.3	45261000	95395000	109870000	90043000
tr|B4DZ08|B4DZ08_HUMANAconitatehydratase,mitochondrialOS=HomosapiensPE=2SV=1;tr|B2RBW5|B2RBW5_HUMANAconitatehydratase,mitochondrialOS=HomosapiensPE=2SV=1;sp|Q99798|ACON_HUMANAconitatehydratase,mitochondrialOS=HomosapiensGN=ACO2PE=1SV=2;tr|A0A0K0K1H7|A0A0K0K1H7_HUMANAconitatehydratase,mitochondrialOS=HomosapiensGN=HEL-S-284PE=2SV=1;tr|A2A274|A2A274_HUMANAconitatehydratase,mitochondrialOS=Homosapie…	tr|B4DZ08|B4DZ08_HUMAN Aconitate hydratase, mitochondrial OS=Homo sapiens PE=2 SV=1;tr|B2RBW5|B2RBW5_HUMAN Aconitate hydratase, mitochondrial OS=Homo sapiens PE=2 SV=1;sp|Q99798|ACON_HUMAN Aconitate hydratase, mitochondrial OS=Homo sapiens GN=ACO2 PE=1 SV=	2228200	3952600	5677200	7459000	1555500	11749000	3394000	2171900	11	30	28	25	33	18	31	30	22	30	28	25	33	18	31	30	22	83.412	0	168.07	By MS/MS	By MS/MS	By MS/MS	By MS/MS	By MS/MS	By MS/MS	By MS/MS	By MS/MS	48.1	45.3	43.6	52.4	30.7	52.8	47.3	33.8	82442000	146250000	210060000	275980000
tr|V9HWK1|V9HWK1_HUMANTriosephosphateisomeraseOS=HomosapiensGN=HEL-S-49PE=2SV=1;sp|P60174-1|TPIS_HUMANIsoform2ofTriosephosphateisomeraseOS=HomosapiensGN=TPI1;sp|P60174|TPIS_HUMANTriosephosphateisomeraseOS=HomosapiensGN=TPI1PE=1SV=3;tr|Q53HE2|Q53HE2_HUMANTriosephosphateisomerase(Fragment)OS=HomosapiensPE=2SV=1;tr|B4DUI5|B4DUI5_HUMANTriosephosphateisomeraseOS=HomosapiensPE=2SV=1;sp|P60174-4|TPIS_HU…	tr|V9HWK1|V9HWK1_HUMAN Triosephosphate isomerase OS=Homo sapiens GN=HEL-S-49 PE=2 SV=1;sp|P60174-1|TPIS_HUMAN Isoform 2 of Triosephosphate isomerase OS=Homo sapiens GN=TPI1;sp|P60174|TPIS_HUMAN Triosephosphate isomerase OS=Homo sapiens GN=TPI1 PE=1 SV=3;tr	2227100	5736400	2330800	2259200	774050	2524500	2037400	8711700	10	11	13	10	11	6	8	12	12	11	13	10	11	6	8	12	12	26.669	0	43.897	By MS/MS	By MS/MS	By MS/MS	By MS/MS	By MS/MS	By MS/MS	By MS/MS	By MS/MS	61	70.7	59.8	61	30.1	43.8	69.5	72.3	37861000	97520000	39624000	38406000
tr|D3DSC5|D3DSC5_HUMANNeuralcelladhesionmolecule2,isoformCRA_a(Fragment)OS=HomosapiensGN=NCAM2PE=4SV=1;tr|H9KV31|H9KV31_HUMANNeuralcelladhesionmolecule2OS=HomosapiensGN=NCAM2PE=1SV=2;sp|O15394|NCAM2_HUMANNeuralcelladhesionmolecule2OS=HomosapiensGN=NCAM2PE=1SV=2	tr|D3DSC5|D3DSC5_HUMAN Neural cell adhesion molecule 2, isoform CRA_a (Fragment) OS=Homo sapiens GN=NCAM2 PE=4 SV=1;tr|H9KV31|H9KV31_HUMAN Neural cell adhesion molecule 2 OS=Homo sapiens GN=NCAM2 PE=1 SV=2;sp|O15394|NCAM2_HUMAN Neural cell adhesion molecul	2195100	10070000	6459700	7707200	1575600	10566000	1624200	957200	3	35	34	32	36	24	37	32	22	1	1	1	1	1	2	2	2	91.051	0	149.97	By MS/MS	By MS/MS	By MS/MS	By MS/MS	By MS/MS	By MS/MS	By MS/MS	By MS/MS	52.8	50.6	48	55.5	34.6	52.8	45.7	31.8	100980000	463220000	297150000	354530000
sp|Q6UWR7|ENPP6_HUMANEctonucleotidepyrophosphatase/phosphodiesterasefamilymember6OS=HomosapiensGN=ENPP6PE=1SV=2;tr|D6R9P1|D6R9P1_HUMANEctonucleotidepyrophosphatase/phosphodiesterasefamilymember6(Fragment)OS=HomosapiensGN=ENPP6PE=1SV=1	sp|Q6UWR7|ENPP6_HUMAN Ectonucleotide pyrophosphatase/phosphodiesterase family member 6 OS=Homo sapiens GN=ENPP6 PE=1 SV=2;tr|D6R9P1|D6R9P1_HUMAN Ectonucleotide pyrophosphatase/phosphodiesterase family member 6 (Fragment) OS=Homo sapiens GN=ENPP6 PE=1 SV=1	2180800	36004	372920	298860	67760	33968	117330	1001100	2	12	1	3	7	1	1	6	7	12	1	3	7	1	1	6	7	50.24	0	27.927	By MS/MS	By matching	By MS/MS	By MS/MS	By MS/MS	By MS/MS	By MS/MS	By MS/MS	28.4	2.5	5.7	17.5	2.5	3.6	13.2	19.3	52339000	864110	8950200	7172600
sp|P36969-2|GPX4_HUMANIsoformCytoplasmicofPhospholipidhydroperoxideglutathioneperoxidase,mitochondrialOS=HomosapiensGN=GPX4;tr|A0A087X2I2|A0A087X2I2_HUMANGlutathioneperoxidaseOS=HomosapiensGN=GPX4PE=1SV=1;sp|P36969|GPX4_HUMANPhospholipidhydroperoxideglutathioneperoxidase,mitochondrialOS=HomosapiensGN=GPX4PE=1SV=3;tr|A0A087WT12|A0A087WT12_HUMANGlutathioneperoxidaseOS=HomosapiensGN=GPX4PE=1SV=1;tr|…	sp|P36969-2|GPX4_HUMAN Isoform Cytoplasmic of Phospholipid hydroperoxide glutathione peroxidase, mitochondrial OS=Homo sapiens GN=GPX4;tr|A0A087X2I2|A0A087X2I2_HUMAN Glutathione peroxidase OS=Homo sapiens GN=GPX4 PE=1 SV=1;sp|P36969|GPX4_HUMAN Phospholipid	2162000	772550	1856900	1645600	344770	3765600	826200	1631500	13	8	4	5	5	3	8	5	7	8	4	5	5	3	8	5	7	19.525	0	14.781	By MS/MS	By MS/MS	By MS/MS	By MS/MS	By MS/MS	By MS/MS	By MS/MS	By MS/MS	52.9	30	34.1	37.6	16.5	52.9	33.5	49.4	23782000	8498100	20425000	18102000
tr|A0A090N7T9|A0A090N7T9_HUMANSecernin1OS=HomosapiensGN=SCRN1PE=4SV=1;sp|Q12765|SCRN1_HUMANSecernin-1OS=HomosapiensGN=SCRN1PE=1SV=2;sp|Q12765-2|SCRN1_HUMANIsoform2ofSecernin-1OS=HomosapiensGN=SCRN1;tr|C9K052|C9K052_HUMANSecernin-1(Fragment)OS=HomosapiensGN=SCRN1PE=1SV=1;tr|B8ZZP4|B8ZZP4_HUMANSecernin-1OS=HomosapiensGN=SCRN1PE=1SV=1;tr|C9J7U9|C9J7U9_HUMANSecernin-1(Fragment)OS=HomosapiensGN=SCRN1P…	tr|A0A090N7T9|A0A090N7T9_HUMAN Secernin 1 OS=Homo sapiens GN=SCRN1 PE=4 SV=1;sp|Q12765|SCRN1_HUMAN Secernin-1 OS=Homo sapiens GN=SCRN1 PE=1 SV=2;sp|Q12765-2|SCRN1_HUMAN Isoform 2 of Secernin-1 OS=Homo sapiens GN=SCRN1;tr|C9K052|C9K052_HUMAN Secernin-1 (Fra	2143800	1795800	1709100	2391600	329770	2024700	1606500	2305500	11	15	9	9	13	7	10	10	10	15	9	9	13	7	10	10	10	46.382	0	39.794	By MS/MS	By MS/MS	By MS/MS	By MS/MS	By MS/MS	By MS/MS	By MS/MS	By MS/MS	46.9	23.2	26.6	34.1	21	31.6	29.7	32.6	36444000	30528000	29054000	40658000
sp|P49419-2|AL7A1_HUMANIsoform2ofAlpha-aminoadipicsemialdehydedehydrogenaseOS=HomosapiensGN=ALDH7A1;tr|A0A1B0GTG2|A0A1B0GTG2_HUMANAlpha-aminoadipicsemialdehydedehydrogenaseOS=HomosapiensGN=ALDH7A1PE=1SV=1;sp|P49419|AL7A1_HUMANAlpha-aminoadipicsemialdehydedehydrogenaseOS=HomosapiensGN=ALDH7A1PE=1SV=5;tr|A0A1B0GW77|A0A1B0GW77_HUMANAlpha-aminoadipicsemialdehydedehydrogenaseOS=HomosapiensGN=ALDH7A1PE…	sp|P49419-2|AL7A1_HUMAN Isoform 2 of Alpha-aminoadipic semialdehyde dehydrogenase OS=Homo sapiens GN=ALDH7A1;tr|A0A1B0GTG2|A0A1B0GTG2_HUMAN Alpha-aminoadipic semialdehyde dehydrogenase OS=Homo sapiens GN=ALDH7A1 PE=1 SV=1;sp|P49419|AL7A1_HUMAN Alpha-aminoa	2129000	656230	1389100	2330500	176120	885380	1087500	2095300	20	16	11	12	18	8	10	14	14	16	11	12	18	8	10	14	14	55.366	0	77.393	By MS/MS	By MS/MS	By MS/MS	By MS/MS	By MS/MS	By MS/MS	By MS/MS	By MS/MS	45.8	27	32.1	55.8	19.2	26	35	30.9	48966000	15093000	31949000	53601000
tr|C9JEN3|C9JEN3_HUMANProteinlifeguard3(Fragment)OS=HomosapiensGN=TMBIM1PE=1SV=1;tr|C9IYT2|C9IYT2_HUMANProteinlifeguard3(Fragment)OS=HomosapiensGN=TMBIM1PE=1SV=1;tr|F8WDY4|F8WDY4_HUMANProteinlifeguard3OS=HomosapiensGN=TMBIM1PE=1SV=1;tr|C9IZ27|C9IZ27_HUMANProteinlifeguard3(Fragment)OS=HomosapiensGN=TMBIM1PE=1SV=8;tr|C9JW19|C9JW19_HUMANProteinlifeguard3(Fragment)OS=HomosapiensGN=TMBIM1PE=1SV=1;tr|C…	tr|C9JEN3|C9JEN3_HUMAN Protein lifeguard 3 (Fragment) OS=Homo sapiens GN=TMBIM1 PE=1 SV=1;tr|C9IYT2|C9IYT2_HUMAN Protein lifeguard 3 (Fragment) OS=Homo sapiens GN=TMBIM1 PE=1 SV=1;tr|F8WDY4|F8WDY4_HUMAN Protein lifeguard 3 OS=Homo sapiens GN=TMBIM1 PE=1 SV	2116600	869670	2338100	1678800	323080	1216700	2518500	627760	11	1	1	1	1	1	1	2	1	1	1	1	1	1	1	2	1	11.535	0	3.2592	By MS/MS	By matching	By MS/MS	By MS/MS	By MS/MS	By matching	By MS/MS	By MS/MS	13.2	13.2	13.2	13.2	13.2	13.2	14.2	13.2	4233300	1739300	4676200	3357600
tr|A0A140VJT8|A0A140VJT8_HUMANTesticulartissueproteinLi164OS=HomosapiensPE=2SV=1;sp|P13489|RINI_HUMANRibonucleaseinhibitorOS=HomosapiensGN=RNH1PE=1SV=2;tr|E9PIM9|E9PIM9_HUMANRibonucleaseinhibitor(Fragment)OS=HomosapiensGN=RNH1PE=1SV=1;tr|H0YCR7|H0YCR7_HUMANRibonucleaseinhibitor(Fragment)OS=HomosapiensGN=RNH1PE=1SV=1;tr|E9PMJ3|E9PMJ3_HUMANRibonucleaseinhibitor(Fragment)OS=HomosapiensGN=RNH1PE=1SV=…	tr|A0A140VJT8|A0A140VJT8_HUMAN Testicular tissue protein Li 164 OS=Homo sapiens PE=2 SV=1;sp|P13489|RINI_HUMAN Ribonuclease inhibitor OS=Homo sapiens GN=RNH1 PE=1 SV=2	2097300	733240	1972900	2139900	381510	1623200	446090	1323600	11	19	11	13	19	9	15	10	12	1	1	1	1	1	1	1	1	49.973	0	66.447	By MS/MS	By MS/MS	By MS/MS	By MS/MS	By MS/MS	By MS/MS	By MS/MS	By MS/MS	61	33	36	61	26.7	42.3	24.5	29.9	54530000	19064000	51294000	55637000
tr|B4DZZ0|B4DZZ0_HUMANPRA1familyproteinOS=HomosapiensPE=2SV=1;tr|B3KQB4|B3KQB4_HUMANPRA1familyproteinOS=HomosapiensPE=2SV=1;tr|A0A024R371|A0A024R371_HUMANPRA1familyproteinOS=HomosapiensGN=ARL6IP5PE=3SV=1;sp|O75915|PRAF3_HUMANPRA1familyprotein3OS=HomosapiensGN=ARL6IP5PE=1SV=1;tr|F8WF90|F8WF90_HUMANPRA1familyproteinOS=HomosapiensGN=ARL6IP5PE=1SV=1;tr|C9JQU6|C9JQU6_HUMANPRA1familyproteinOS=Homosapie…	tr|B4DZZ0|B4DZZ0_HUMAN PRA1 family protein OS=Homo sapiens PE=2 SV=1;tr|B3KQB4|B3KQB4_HUMAN PRA1 family protein OS=Homo sapiens PE=2 SV=1;tr|A0A024R371|A0A024R371_HUMAN PRA1 family protein OS=Homo sapiens GN=ARL6IP5 PE=3 SV=1;sp|O75915|PRAF3_HUMAN PRA1 fam	2085100	6128700	6347500	6191000	1744200	11366000	933280	95336	8	6	6	6	5	4	6	4	1	6	6	6	5	4	6	4	1	19.206	0	29.208	By MS/MS	By MS/MS	By MS/MS	By MS/MS	By MS/MS	By MS/MS	By MS/MS	By matching	32.7	32.7	32.7	28.5	20.6	32.7	20.6	5.5	12511000	36772000	38085000	37146000
tr|K7ENE8|K7ENE8_HUMANFXYDdomain-containingiontransportregulator7OS=HomosapiensGN=FXYD7PE=1SV=1;sp|P58549|FXYD7_HUMANFXYDdomain-containingiontransportregulator7OS=HomosapiensGN=FXYD7PE=1SV=1;tr|K7EKU3|K7EKU3_HUMANFXYDdomain-containingiontransportregulator7OS=HomosapiensGN=FXYD7PE=1SV=1	tr|K7ENE8|K7ENE8_HUMAN FXYD domain-containing ion transport regulator 7 OS=Homo sapiens GN=FXYD7 PE=1 SV=1;sp|P58549|FXYD7_HUMAN FXYD domain-containing ion transport regulator 7 OS=Homo sapiens GN=FXYD7 PE=1 SV=1;tr|K7EKU3|K7EKU3_HUMAN FXYD domain-containi	2079800	11450000	13857000	6327300	3170600	21520000	629520	8912900	3	2	2	2	2	2	2	2	2	2	2	2	2	2	2	2	2	8.1514	0	7.4258	By MS/MS	By MS/MS	By MS/MS	By MS/MS	By MS/MS	By MS/MS	By MS/MS	By MS/MS	20.8	20.8	20.8	20.8	20.8	20.8	20.8	20.8	6239300	34351000	41571000	18982000
sp|Q9BPU6|DPYL5_HUMANDihydropyrimidinase-relatedprotein5OS=HomosapiensGN=DPYSL5PE=1SV=1;tr|Q53SW3|Q53SW3_HUMANUncharacterizedproteinDPYSL5(Fragment)OS=HomosapiensGN=DPYSL5PE=4SV=1;tr|E7EWB4|E7EWB4_HUMANDihydropyrimidinase-relatedprotein5(Fragment)OS=HomosapiensGN=DPYSL5PE=1SV=8;tr|E9PHT0|E9PHT0_HUMANDihydropyrimidinase-relatedprotein5(Fragment)OS=HomosapiensGN=DPYSL5PE=1SV=1;tr|E7ESV0|E7ESV0_HUMA…	sp|Q9BPU6|DPYL5_HUMAN Dihydropyrimidinase-related protein 5 OS=Homo sapiens GN=DPYSL5 PE=1 SV=1;tr|Q53SW3|Q53SW3_HUMAN Uncharacterized protein DPYSL5 (Fragment) OS=Homo sapiens GN=DPYSL5 PE=4 SV=1	2078000	666920	1699200	4146600	207400	2527500	632710	413220	6	16	9	10	15	5	11	12	8	16	9	10	15	5	11	12	8	61.421	0	48.017	By MS/MS	By MS/MS	By MS/MS	By MS/MS	By MS/MS	By MS/MS	By MS/MS	By MS/MS	41	23	24.3	39	8.9	26.1	27.3	18.4	62341000	20008000	50976000	124400000
tr|I3L0N3|I3L0N3_HUMANVesicle-fusingATPaseOS=HomosapiensGN=NSFPE=1SV=1;tr|B7Z5J7|B7Z5J7_HUMANcDNAFLJ58682,highlysimilartoVesicle-fusingATPase(EC3.6.4.6)OS=HomosapiensPE=2SV=1;sp|P46459|NSF_HUMANVesicle-fusingATPaseOS=HomosapiensGN=NSFPE=1SV=3;tr|B7Z9U2|B7Z9U2_HUMANcDNA,FLJ78956,highlysimilartoVesicle-fusingATPase(EC3.6.4.6)OS=HomosapiensPE=2SV=1;tr|B4DH19|B4DH19_HUMANcDNAFLJ54615,highlysimilartoV…	tr|I3L0N3|I3L0N3_HUMAN Vesicle-fusing ATPase OS=Homo sapiens GN=NSF PE=1 SV=1;tr|B7Z5J7|B7Z5J7_HUMAN cDNA FLJ58682, highly similar to Vesicle-fusing ATPase (EC 3.6.4.6) OS=Homo sapiens PE=2 SV=1;sp|P46459|NSF_HUMAN Vesicle-fusing ATPase OS=Homo sapiens GN=	2062700	2576200	3468700	4965200	832100	7607900	1557500	636180	16	33	27	27	33	22	32	29	22	33	27	27	33	22	32	29	22	82.091	0	131.79	By MS/MS	By MS/MS	By MS/MS	By MS/MS	By MS/MS	By MS/MS	By MS/MS	By MS/MS	48.7	36.5	37.3	48	36.3	43.7	41.4	34.2	96946000	121080000	163030000	233370000
tr|Q53GB9|Q53GB9_HUMANMicrosomalglutathioneS-transferase3variant(Fragment)OS=HomosapiensPE=2SV=1;tr|A0A024R8Z1|A0A024R8Z1_HUMANMicrosomalglutathioneS-transferase3,isoformCRA_aOS=HomosapiensGN=MGST3PE=4SV=1;sp|O14880|MGST3_HUMANMicrosomalglutathioneS-transferase3OS=HomosapiensGN=MGST3PE=1SV=1;tr|Q5VV89|Q5VV89_HUMANMicrosomalglutathioneS-transferase3OS=HomosapiensGN=MGST3PE=1SV=1;tr|Q5VV87|Q5VV87_H…	tr|Q53GB9|Q53GB9_HUMAN Microsomal glutathione S-transferase 3 variant (Fragment) OS=Homo sapiens PE=2 SV=1;tr|A0A024R8Z1|A0A024R8Z1_HUMAN Microsomal glutathione S-transferase 3, isoform CRA_a OS=Homo sapiens GN=MGST3 PE=4 SV=1;sp|O14880|MGST3_HUMAN Microso	2060100	14722000	8033300	7145900	3818400	13459000	188650	737350	5	4	3	3	4	2	4	3	2	4	3	3	4	2	4	3	2	16.53	0	21.652	By MS/MS	By MS/MS	By MS/MS	By MS/MS	By MS/MS	By MS/MS	By MS/MS	By MS/MS	33.6	32.2	32.2	33.6	17.8	33.6	32.2	17.8	14421000	103060000	56233000	50021000
tr|A0A0A8K8F5|A0A0A8K8F5_HUMANSecretorycarrier-associatedmembraneproteinOS=HomosapiensGN=SCAMP5PE=2SV=1;sp|Q8TAC9|SCAM5_HUMANSecretorycarrier-associatedmembraneprotein5OS=HomosapiensGN=SCAMP5PE=1SV=1;sp|Q8TAC9-2|SCAM5_HUMANIsoform2ofSecretorycarrier-associatedmembraneprotein5OS=HomosapiensGN=SCAMP5;tr|H3BP89|H3BP89_HUMANSecretorycarrier-associatedmembraneproteinOS=HomosapiensGN=SCAMP5PE=1SV=1;tr|…	tr|A0A0A8K8F5|A0A0A8K8F5_HUMAN Secretory carrier-associated membrane protein OS=Homo sapiens GN=SCAMP5 PE=2 SV=1;sp|Q8TAC9|SCAM5_HUMAN Secretory carrier-associated membrane protein 5 OS=Homo sapiens GN=SCAMP5 PE=1 SV=1;sp|Q8TAC9-2|SCAM5_HUMAN Isoform 2 of	2046300	35861000	13652000	18751000	8167900	37649000	6266900	1417600	13	2	3	3	2	3	2	2	2	2	3	3	2	3	2	2	2	26.104	0	8.5969	By MS/MS	By MS/MS	By MS/MS	By MS/MS	By MS/MS	By MS/MS	By MS/MS	By MS/MS	8.5	9.8	9.8	8.5	9.8	8.5	8.5	8.5	8185100	143450000	54607000	75004000
sp|O43301|HS12A_HUMANHeatshock70kDaprotein12AOS=HomosapiensGN=HSPA12APE=1SV=2;tr|B7Z2F7|B7Z2F7_HUMANcDNAFLJ54655,highlysimilartoHeatshock70kDaprotein12AOS=HomosapiensPE=2SV=1;tr|B7Z2M8|B7Z2M8_HUMANcDNAFLJ54654,highlysimilartoHeatshock70kDaprotein12AOS=HomosapiensPE=2SV=1;tr|K7ENF6|K7ENF6_HUMANHeatshock70kDaprotein12A(Fragment)OS=HomosapiensGN=HSPA12APE=1SV=1;tr|K7ELE6|K7ELE6_HUMANHeatshock70kDapr…	sp|O43301|HS12A_HUMAN Heat shock 70 kDa protein 12A OS=Homo sapiens GN=HSPA12A PE=1 SV=2;tr|B7Z2F7|B7Z2F7_HUMAN cDNA FLJ54655, highly similar to Heat shock 70 kDa protein 12A OS=Homo sapiens PE=2 SV=1;tr|B7Z2M8|B7Z2M8_HUMAN cDNA FLJ54654, highly similar to	2041400	2493600	3156100	4361600	1204100	4751200	1075000	1955000	5	28	24	21	28	16	22	19	17	1	2	1	1	1	1	1	1	74.977	0	180.82	By MS/MS	By MS/MS	By MS/MS	By MS/MS	By MS/MS	By MS/MS	By MS/MS	By MS/MS	43.1	36.3	32	44	24.9	35.7	29.2	27.4	77573000	94758000	119930000	165740000
tr|V9HWF4|V9HWF4_HUMANPhosphoglyceratekinaseOS=HomosapiensGN=HEL-S-68pPE=2SV=1;sp|P00558|PGK1_HUMANPhosphoglyceratekinase1OS=HomosapiensGN=PGK1PE=1SV=3;sp|P00558-2|PGK1_HUMANIsoform2ofPhosphoglyceratekinase1OS=HomosapiensGN=PGK1;tr|B4E1H9|B4E1H9_HUMANPhosphoglyceratekinaseOS=HomosapiensPE=2SV=1;tr|B4DHM5|B4DHM5_HUMANPhosphoglyceratekinaseOS=HomosapiensPE=2SV=1;tr|B4DHB3|B4DHB3_HUMANPhosphoglycera…	tr|V9HWF4|V9HWF4_HUMAN Phosphoglycerate kinase OS=Homo sapiens GN=HEL-S-68p PE=2 SV=1;sp|P00558|PGK1_HUMAN Phosphoglycerate kinase 1 OS=Homo sapiens GN=PGK1 PE=1 SV=3;sp|P00558-2|PGK1_HUMAN Isoform 2 of Phosphoglycerate kinase 1 OS=Homo sapiens GN=PGK1;tr|	2038100	2277000	2880100	3807300	567470	3674300	966450	1335800	10	19	16	16	18	11	16	13	13	19	16	16	18	11	16	13	13	44.614	0	88.918	By MS/MS	By MS/MS	By MS/MS	By MS/MS	By MS/MS	By MS/MS	By MS/MS	By MS/MS	62.8	50.8	50.6	56.6	34.3	51.6	40.3	41.5	55028000	61479000	77763000	102800000
sp|Q9H3Z4|DNJC5_HUMANDnaJhomologsubfamilyCmember5OS=HomosapiensGN=DNAJC5PE=1SV=1;sp|Q9H3Z4-2|DNJC5_HUMANIsoform2ofDnaJhomologsubfamilyCmember5OS=HomosapiensGN=DNAJC5;tr|Q8TET0|Q8TET0_HUMANFLJ00095protein(Fragment)OS=HomosapiensGN=FLJ00095PE=2SV=1;tr|Q6AHX3|Q6AHX3_HUMANUncharacterizedproteinDKFZp761N1221(Fragment)OS=HomosapiensGN=DKFZp761N1221PE=2SV=1	sp|Q9H3Z4|DNJC5_HUMAN DnaJ homolog subfamily C member 5 OS=Homo sapiens GN=DNAJC5 PE=1 SV=1;sp|Q9H3Z4-2|DNJC5_HUMAN Isoform 2 of DnaJ homolog subfamily C member 5 OS=Homo sapiens GN=DNAJC5;tr|Q8TET0|Q8TET0_HUMAN FLJ00095 protein (Fragment) OS=Homo sapiens	2018900	27145000	2893200	5340000	1032300	16232000	2468400	14339000	4	5	7	5	4	4	6	5	6	5	7	5	4	4	6	5	6	22.149	0	44.592	By MS/MS	By MS/MS	By MS/MS	By MS/MS	By MS/MS	By MS/MS	By MS/MS	By MS/MS	28.8	46	46	46	28.8	46	45.5	46	14132000	190010000	20252000	37380000
tr|B4DFL1|B4DFL1_HUMANDihydrolipoyldehydrogenaseOS=HomosapiensPE=2SV=1;tr|A0A024R713|A0A024R713_HUMANDihydrolipoyldehydrogenaseOS=HomosapiensGN=DLDPE=3SV=1;sp|P09622|DLDH_HUMANDihydrolipoyldehydrogenase,mitochondrialOS=HomosapiensGN=DLDPE=1SV=2;sp|P09622-3|DLDH_HUMANIsoform3ofDihydrolipoyldehydrogenase,mitochondrialOS=HomosapiensGN=DLD;tr|E9PEX6|E9PEX6_HUMANDihydrolipoyldehydrogenaseOS=Homosapien…	tr|B4DFL1|B4DFL1_HUMAN Dihydrolipoyl dehydrogenase OS=Homo sapiens PE=2 SV=1;tr|A0A024R713|A0A024R713_HUMAN Dihydrolipoyl dehydrogenase OS=Homo sapiens GN=DLD PE=3 SV=1;sp|P09622|DLDH_HUMAN Dihydrolipoyl dehydrogenase, mitochondrial OS=Homo sapiens GN=DLD	1990100	8494100	7093100	8386000	2902500	14900000	1619800	696180	10	16	15	15	18	15	17	14	8	16	15	15	18	15	17	14	8	48.899	0	96.211	By MS/MS	By MS/MS	By MS/MS	By MS/MS	By MS/MS	By MS/MS	By MS/MS	By MS/MS	41.2	32.2	32.2	47.1	34.9	45.1	37.3	21.4	39802000	169880000	141860000	167720000
tr|A0A0A0MRA8|A0A0A0MRA8_HUMANBand4.1-likeprotein3OS=HomosapiensGN=EPB41L3PE=1SV=1;sp|Q9Y2J2-2|E41L3_HUMANIsoform2ofBand4.1-likeprotein3OS=HomosapiensGN=EPB41L3;sp|Q9Y2J2-4|E41L3_HUMANIsoform4ofBand4.1-likeprotein3OS=HomosapiensGN=EPB41L3;tr|B3KY28|B3KY28_HUMANcDNAFLJ46689fis,cloneTRACH3012106,highlysimilartoBand4.1-likeprotein3OS=HomosapiensPE=2SV=1;tr|A8K968|A8K968_HUMANBand4.1-likeprotein3OS=H…	tr|A0A0A0MRA8|A0A0A0MRA8_HUMAN Band 4.1-like protein 3 OS=Homo sapiens GN=EPB41L3 PE=1 SV=1;sp|Q9Y2J2-2|E41L3_HUMAN Isoform 2 of Band 4.1-like protein 3 OS=Homo sapiens GN=EPB41L3;sp|Q9Y2J2-4|E41L3_HUMAN Isoform 4 of Band 4.1-like protein 3 OS=Homo sapiens	1982400	4030700	5062000	5772200	900410	3636900	395550	223780	12	37	34	33	40	24	29	25	17	1	1	1	1	1	1	1	1	102.29	0	200.36	By MS/MS	By MS/MS	By MS/MS	By MS/MS	By MS/MS	By MS/MS	By MS/MS	By MS/MS	49	46	45.4	50.5	33.1	40.1	35.6	21.1	101100000	205570000	258160000	294380000
tr|Q5JP53|Q5JP53_HUMANTubulinbetachainOS=HomosapiensGN=TUBBPE=1SV=1;tr|Q5SU16|Q5SU16_HUMANTubulinbetachainOS=HomosapiensGN=TUBBPE=1SV=1;sp|P07437|TBB5_HUMANTubulinbetachainOS=HomosapiensGN=TUBBPE=1SV=2;tr|B7ZAF0|B7ZAF0_HUMANTubulinbetachainOS=HomosapiensPE=2SV=1;tr|B4DY90|B4DY90_HUMANTubulinbetachainOS=HomosapiensPE=2SV=1;tr|Q5ST81|Q5ST81_HUMANTubulinbetachainOS=HomosapiensGN=TUBBPE=1SV=1;tr|Q6LC…	tr|Q5JP53|Q5JP53_HUMAN Tubulin beta chain OS=Homo sapiens GN=TUBB PE=1 SV=1;tr|Q5SU16|Q5SU16_HUMAN Tubulin beta chain OS=Homo sapiens GN=TUBB PE=1 SV=1;sp|P07437|TBB5_HUMAN Tubulin beta chain OS=Homo sapiens GN=TUBB PE=1 SV=2;tr|B7ZAF0|B7ZAF0_HUMAN Tubulin	1980900	648620	1480100	4183000	615750	9600000	2392800	5288200	21	26	21	22	26	20	26	25	23	5	2	2	5	3	5	5	4	47.766	0	121.07	By MS/MS	By MS/MS	By MS/MS	By MS/MS	By MS/MS	By MS/MS	By MS/MS	By MS/MS	66.2	54.9	55.2	66.2	55.4	66.2	65.5	58.9	37637000	12324000	28123000	79478000
sp|P27824|CALX_HUMANCalnexinOS=HomosapiensGN=CANXPE=1SV=2;sp|P27824-2|CALX_HUMANIsoform2ofCalnexinOS=HomosapiensGN=CANX;sp|P27824-3|CALX_HUMANIsoform3ofCalnexinOS=HomosapiensGN=CANX;tr|H0Y9Q7|H0Y9Q7_HUMANCalnexin(Fragment)OS=HomosapiensGN=CANXPE=1SV=1;tr|D6RGY2|D6RGY2_HUMANCalnexin(Fragment)OS=HomosapiensGN=CANXPE=1SV=1;tr|Q6ZP56|Q6ZP56_HUMANcDNAFLJ26480fis,cloneKDN05071,highlysimilartoCalnexinOS…	sp|P27824|CALX_HUMAN Calnexin OS=Homo sapiens GN=CANX PE=1 SV=2;sp|P27824-2|CALX_HUMAN Isoform 2 of Calnexin OS=Homo sapiens GN=CANX;sp|P27824-3|CALX_HUMAN Isoform 3 of Calnexin OS=Homo sapiens GN=CANX	1950900	1263800	776940	2601400	285670	2519000	937140	1111400	15	14	11	8	15	3	10	10	10	14	11	8	15	3	10	10	10	67.567	0	45.278	By MS/MS	By MS/MS	By MS/MS	By MS/MS	By MS/MS	By MS/MS	By MS/MS	By MS/MS	24.7	22.6	15.9	27.9	7.3	17.9	21.1	21.5	62430000	40442000	24862000	83245000
sp|P38606|VATA_HUMANV-typeprotonATPasecatalyticsubunitAOS=HomosapiensGN=ATP6V1APE=1SV=2;sp|P38606-2|VATA_HUMANIsoform2ofV-typeprotonATPasecatalyticsubunitAOS=HomosapiensGN=ATP6V1A;tr|B7Z2V6|B7Z2V6_HUMANcDNAFLJ53889,highlysimilartoVacuolarATPsynthasecatalyticsubunitA,ubiquitousisoform(EC3.6.3.14)OS=HomosapiensPE=2SV=1;tr|C9JVW8|C9JVW8_HUMANV-typeprotonATPasecatalyticsubunitA(Fragment)OS=Homosapien…	sp|P38606|VATA_HUMAN V-type proton ATPase catalytic subunit A OS=Homo sapiens GN=ATP6V1A PE=1 SV=2;sp|P38606-2|VATA_HUMAN Isoform 2 of V-type proton ATPase catalytic subunit A OS=Homo sapiens GN=ATP6V1A	1939500	2788800	4625300	5643500	1749400	9171600	3548200	4677300	5	24	19	19	23	15	24	21	20	24	19	19	23	15	24	21	20	68.303	0	137.01	By MS/MS	By MS/MS	By MS/MS	By MS/MS	By MS/MS	By MS/MS	By MS/MS	By MS/MS	49.6	42.3	42.3	49.6	32.6	55.1	43.8	40	65943000	94819000	157260000	191880000
sp|P08195-3|4F2_HUMANIsoform3of4F2cell-surfaceantigenheavychainOS=HomosapiensGN=SLC3A2;tr|F5GZS6|F5GZS6_HUMAN4F2cell-surfaceantigenheavychainOS=HomosapiensGN=SLC3A2PE=1SV=1;sp|P08195|4F2_HUMAN4F2cell-surfaceantigenheavychainOS=HomosapiensGN=SLC3A2PE=1SV=3;tr|J3KPF3|J3KPF3_HUMAN4F2cell-surfaceantigenheavychainOS=HomosapiensGN=SLC3A2PE=1SV=1;sp|P08195-4|4F2_HUMANIsoform4of4F2cell-surfaceantigenheav…	sp|P08195-3|4F2_HUMAN Isoform 3 of 4F2 cell-surface antigen heavy chain OS=Homo sapiens GN=SLC3A2;tr|F5GZS6|F5GZS6_HUMAN 4F2 cell-surface antigen heavy chain OS=Homo sapiens GN=SLC3A2 PE=1 SV=1;sp|P08195|4F2_HUMAN 4F2 cell-surface antigen heavy chain OS=Ho	1933700	3259200	3855400	4680200	746660	7874300	904880	215470	15	19	16	17	20	11	22	13	8	19	16	17	20	11	22	13	8	61.815	0	124.55	By MS/MS	By MS/MS	By MS/MS	By MS/MS	By MS/MS	By MS/MS	By MS/MS	By MS/MS	33.1	29	34	35.2	20.8	38.2	24.1	14.1	54143000	91258000	107950000	131050000
sp|P62826|RAN_HUMANGTP-bindingnuclearproteinRanOS=HomosapiensGN=RANPE=1SV=3;tr|B5MDF5|B5MDF5_HUMANGTP-bindingnuclearproteinRanOS=HomosapiensGN=RANPE=1SV=1;tr|J3KQE5|J3KQE5_HUMANGTP-bindingnuclearproteinRan(Fragment)OS=HomosapiensGN=RANPE=1SV=1;tr|F5H018|F5H018_HUMANGTP-bindingnuclearproteinRan(Fragment)OS=HomosapiensGN=RANPE=1SV=8;tr|H0YFC6|H0YFC6_HUMANGTP-bindingnuclearproteinRan(Fragment)OS=Hom…	sp|P62826|RAN_HUMAN GTP-binding nuclear protein Ran OS=Homo sapiens GN=RAN PE=1 SV=3;tr|B5MDF5|B5MDF5_HUMAN GTP-binding nuclear protein Ran OS=Homo sapiens GN=RAN PE=1 SV=1;tr|J3KQE5|J3KQE5_HUMAN GTP-binding nuclear protein Ran (Fragment) OS=Homo sapiens G	1897200	6386800	5087400	4348000	1627000	6594900	773130	178920	7	7	6	7	7	6	9	7	3	6	5	6	6	5	7	6	3	24.423	0	32.103	By MS/MS	By MS/MS	By MS/MS	By MS/MS	By MS/MS	By MS/MS	By MS/MS	By MS/MS	34.3	28.2	28.2	34.3	25	46.3	26.9	14.8	20869000	70255000	55961000	47828000
tr|A0A024R8G3|A0A024R8G3_HUMANProstaglandinD2synthase21kDa(Brain),isoformCRA_aOS=HomosapiensGN=PTGDSPE=2SV=1;sp|P41222|PTGDS_HUMANProstaglandin-H2D-isomeraseOS=HomosapiensGN=PTGDSPE=1SV=1;tr|H0Y5A1|H0Y5A1_HUMANProstaglandin-H2D-isomerase(Fragment)OS=HomosapiensGN=PTGDSPE=1SV=2;tr|Q5SQ11|Q5SQ11_HUMANProstaglandin-H2D-isomerase(Fragment)OS=HomosapiensGN=PTGDSPE=1SV=1	tr|A0A024R8G3|A0A024R8G3_HUMAN Prostaglandin D2 synthase 21kDa (Brain), isoform CRA_a OS=Homo sapiens GN=PTGDS PE=2 SV=1;sp|P41222|PTGDS_HUMAN Prostaglandin-H2 D-isomerase OS=Homo sapiens GN=PTGDS PE=1 SV=1;tr|H0Y5A1|H0Y5A1_HUMAN Prostaglandin-H2 D-isomera	1894800	0	449680	1337500	41340	99735	448300	587270	4	2	0	1	2	1	1	3	2	2	0	1	2	1	1	3	2	21.029	0	13.352	By MS/MS		By MS/MS	By MS/MS	By MS/MS	By matching	By MS/MS	By MS/MS	17.4	0	8.9	17.4	8.9	8.9	21.1	12.6	15159000	0	3597400	10700000
tr|A8K0B6|A8K0B6_HUMANcDNAFLJ77858,highlysimilartoHomosapiensN-acylsphingosineamidohydrolase(acidceramidase)1(ASAH1),transcriptvariant1,mRNAOS=HomosapiensPE=2SV=1;tr|D3DSQ1|D3DSQ1_HUMANN-acylsphingosineamidohydrolase(Acidceramidase)1,isoformCRA_cOS=HomosapiensGN=ASAH1PE=4SV=1;tr|A0A1B0GTP7|A0A1B0GTP7_HUMANAcidceramidaseOS=HomosapiensGN=ASAH1PE=1SV=1;tr|B3KUZ6|B3KUZ6_HUMANcDNAFLJ40980fis,cloneUTER…	tr|A8K0B6|A8K0B6_HUMAN cDNA FLJ77858, highly similar to Homo sapiens N-acylsphingosine amidohydrolase (acid ceramidase) 1 (ASAH1), transcript variant 1, mRNA OS=Homo sapiens PE=2 SV=1;tr|D3DSQ1|D3DSQ1_HUMAN N-acylsphingosine amidohydrolase (Acid ceramidase	1887200	75408	319460	1017300	65610	938070	1421300	570770	44	11	3	4	7	4	5	8	5	11	3	4	7	4	5	8	5	44.673	0	23.743	By MS/MS	By matching	By MS/MS	By MS/MS	By MS/MS	By MS/MS	By MS/MS	By MS/MS	37	7.6	10.6	21	10.6	16.2	20.8	16.5	45293000	1809800	7667100	24416000
sp|Q96FJ2|DYL2_HUMANDyneinlightchain2,cytoplasmicOS=HomosapiensGN=DYNLL2PE=1SV=1	sp|Q96FJ2|DYL2_HUMAN Dynein light chain 2, cytoplasmic OS=Homo sapiens GN=DYNLL2 PE=1 SV=1	1883600	3014200	2172800	4267300	603900	2726000	235200	569950	1	5	4	3	4	3	4	3	3	2	2	1	2	2	2	1	1	10.35	0	9.2128	By MS/MS	By MS/MS	By MS/MS	By MS/MS	By MS/MS	By MS/MS	By MS/MS	By MS/MS	40.4	38.2	38.2	28.1	25.8	38.2	32.6	32.6	9417800	15071000	10864000	21336000
tr|A1L306|A1L306_HUMANTNRproteinOS=HomosapiensGN=TNRPE=1SV=1;sp|Q92752|TENR_HUMANTenascin-ROS=HomosapiensGN=TNRPE=1SV=3;sp|Q92752-2|TENR_HUMANIsoform2ofTenascin-ROS=HomosapiensGN=TNR;tr|H0Y668|H0Y668_HUMANTenascin-R(Fragment)OS=HomosapiensGN=TNRPE=1SV=9	tr|A1L306|A1L306_HUMAN TNR protein OS=Homo sapiens GN=TNR PE=1 SV=1;sp|Q92752|TENR_HUMAN Tenascin-R OS=Homo sapiens GN=TNR PE=1 SV=3;sp|Q92752-2|TENR_HUMAN Isoform 2 of Tenascin-R OS=Homo sapiens GN=TNR	1874300	580640	1512000	2326000	232640	1700000	637870	177260	4	24	16	16	23	13	17	18	11	24	16	16	23	13	17	18	11	138.58	0	80.722	By MS/MS	By MS/MS	By MS/MS	By MS/MS	By MS/MS	By MS/MS	By MS/MS	By MS/MS	25.9	13.8	13.8	24.4	12.6	18.5	18.3	9.5	97463000	30193000	78623000	120950000
tr|V9HWE9|V9HWE9_HUMANEpididymissecretoryproteinLi22OS=HomosapiensGN=HEL-S-22PE=2SV=1;sp|P09211|GSTP1_HUMANGlutathioneS-transferasePOS=HomosapiensGN=GSTP1PE=1SV=2;tr|A8MX94|A8MX94_HUMANGlutathioneS-transferasePOS=HomosapiensGN=GSTP1PE=1SV=1;tr|C7DJS1|C7DJS1_HUMANGlutathioneS-transferasepi(Fragment)OS=HomosapiensGN=GSTP1PE=2SV=1;tr|A0A087X2E9|A0A087X2E9_HUMANGlutathioneS-transferaseP(Fragment)OS=H…	tr|V9HWE9|V9HWE9_HUMAN Epididymis secretory protein Li 22 OS=Homo sapiens GN=HEL-S-22 PE=2 SV=1;sp|P09211|GSTP1_HUMAN Glutathione S-transferase P OS=Homo sapiens GN=GSTP1 PE=1 SV=2;tr|A8MX94|A8MX94_HUMAN Glutathione S-transferase P OS=Homo sapiens GN=GSTP1	1858600	645850	857200	1475400	257250	951170	969020	4367800	7	8	5	5	6	3	4	6	6	5	3	3	4	1	2	3	3	23.356	0	94.088	By MS/MS	By MS/MS	By MS/MS	By MS/MS	By MS/MS	By MS/MS	By MS/MS	By MS/MS	60.5	30.5	30.5	39	17.6	25.2	39.5	39.5	20445000	7104300	9429200	16229000
tr|D0PNI1|D0PNI1_HUMANEpididymisluminalprotein4OS=HomosapiensGN=YWHAZPE=2SV=1;sp|P63104|1433Z_HUMAN14-3-3proteinzeta/deltaOS=HomosapiensGN=YWHAZPE=1SV=1;tr|E7EX29|E7EX29_HUMAN14-3-3proteinzeta/delta(Fragment)OS=HomosapiensGN=YWHAZPE=1SV=1;tr|B0AZS6|B0AZS6_HUMAN14-3-3proteinzeta/deltaOS=HomosapiensGN=YWHAZPE=1SV=1;sp|P63104-2|1433Z_HUMANIsoform2of14-3-3proteinzeta/deltaOS=HomosapiensGN=YWHAZ;tr|B7…	tr|D0PNI1|D0PNI1_HUMAN Epididymis luminal protein 4 OS=Homo sapiens GN=YWHAZ PE=2 SV=1;sp|P63104|1433Z_HUMAN 14-3-3 protein zeta/delta OS=Homo sapiens GN=YWHAZ PE=1 SV=1;tr|E7EX29|E7EX29_HUMAN 14-3-3 protein zeta/delta (Fragment) OS=Homo sapiens GN=YWHAZ P	1857200	2765600	4218600	3946000	1054200	4795600	2924300	2733200	14	8	5	6	7	5	8	8	6	6	3	4	5	4	6	6	5	27.745	0	27.079	By MS/MS	By MS/MS	By MS/MS	By MS/MS	By MS/MS	By MS/MS	By MS/MS	By MS/MS	38.8	22.9	30.6	35.1	26.1	38.8	33.9	29.8	26001000	38718000	59061000	55245000
tr|A0A024R7Z5|A0A024R7Z5_HUMANSyndecanbindingprotein(Syntenin),isoformCRA_cOS=HomosapiensGN=SDCBPPE=4SV=1;sp|O00560|SDCB1_HUMANSyntenin-1OS=HomosapiensGN=SDCBPPE=1SV=1;tr|B4DHN5|B4DHN5_HUMANSyntenin-1OS=HomosapiensGN=SDCBPPE=1SV=1;tr|E9PBU7|E9PBU7_HUMANSyntenin-1OS=HomosapiensGN=SDCBPPE=1SV=1;tr|B4DQ93|B4DQ93_HUMANcDNAFLJ52996,highlysimilartoSyntenin-1OS=HomosapiensPE=2SV=1;sp|O00560-3|SDCB1_HUMA…	tr|A0A024R7Z5|A0A024R7Z5_HUMAN Syndecan binding protein (Syntenin), isoform CRA_c OS=Homo sapiens GN=SDCBP PE=4 SV=1;sp|O00560|SDCB1_HUMAN Syntenin-1 OS=Homo sapiens GN=SDCBP PE=1 SV=1;tr|B4DHN5|B4DHN5_HUMAN Syntenin-1 OS=Homo sapiens GN=SDCBP PE=1 SV=1;tr	1848900	165000	1334500	3146300	39181	4480600	3556600	1722300	6	11	4	7	11	2	9	9	8	1	1	1	1	0	1	1	1	32.444	0	61.685	By MS/MS	By MS/MS	By MS/MS	By MS/MS	By matching	By MS/MS	By MS/MS	By MS/MS	55.7	20.5	35.6	55.7	7.4	49.3	55.7	49.3	20338000	1815000	14680000	34610000
tr|V9HW22|V9HW22_HUMANEpididymisluminalprotein33OS=HomosapiensGN=HEL-S-72pPE=2SV=1;sp|P11142|HSP7C_HUMANHeatshockcognate71kDaproteinOS=HomosapiensGN=HSPA8PE=1SV=1;tr|B3KTV0|B3KTV0_HUMANcDNAFLJ38781fis,cloneLIVER2000216,highlysimilartoHEATSHOCKCOGNATE71kDaPROTEINOS=HomosapiensPE=2SV=1;tr|E9PKE3|E9PKE3_HUMANHeatshockcognate71kDaproteinOS=HomosapiensGN=HSPA8PE=1SV=1;tr|Q53HF2|Q53HF2_HUMANHeatshock70…	tr|V9HW22|V9HW22_HUMAN Epididymis luminal protein 33 OS=Homo sapiens GN=HEL-S-72p PE=2 SV=1;sp|P11142|HSP7C_HUMAN Heat shock cognate 71 kDa protein OS=Homo sapiens GN=HSPA8 PE=1 SV=1;tr|B3KTV0|B3KTV0_HUMAN cDNA FLJ38781 fis, clone LIVER2000216, highly simi	1843700	2420500	5068700	4894700	924710	4855400	917540	879360	27	20	19	21	21	14	21	19	11	11	11	12	12	9	12	10	5	70.897	0	95.078	By MS/MS	By MS/MS	By MS/MS	By MS/MS	By MS/MS	By MS/MS	By MS/MS	By MS/MS	36.5	35.8	37.3	38.1	28.8	39	35.1	23.4	60841000	79875000	167270000	161530000
sp|Q8NFZ8|CADM4_HUMANCelladhesionmolecule4OS=HomosapiensGN=CADM4PE=1SV=1	sp|Q8NFZ8|CADM4_HUMAN Cell adhesion molecule 4 OS=Homo sapiens GN=CADM4 PE=1 SV=1	1826700	2175900	2105100	2001900	158400	1111100	314430	2430100	1	10	10	10	10	6	8	11	13	10	10	10	10	6	8	11	13	42.785	0	113.98	By MS/MS	By MS/MS	By MS/MS	By MS/MS	By MS/MS	By MS/MS	By MS/MS	By MS/MS	35.3	35.3	35.3	35.3	22.9	30.9	37.6	41	25574000	30462000	29471000	28027000
sp|Q15019|SEPT2_HUMANSeptin-2OS=HomosapiensGN=SEPT2PE=1SV=1;sp|Q15019-3|SEPT2_HUMANIsoform3ofSeptin-2OS=HomosapiensGN=SEPT2;sp|Q15019-2|SEPT2_HUMANIsoform2ofSeptin-2OS=HomosapiensGN=SEPT2;tr|B5MCX3|B5MCX3_HUMANSeptin-2OS=HomosapiensGN=SEPT2PE=1SV=1;tr|C9J2Q4|C9J2Q4_HUMANSeptin-2(Fragment)OS=HomosapiensGN=SEPT2PE=1SV=1;tr|C9J938|C9J938_HUMANSeptin-2(Fragment)OS=HomosapiensGN=SEPT2PE=1SV=1;tr|C9JB2…	sp|Q15019|SEPT2_HUMAN Septin-2 OS=Homo sapiens GN=SEPT2 PE=1 SV=1;sp|Q15019-3|SEPT2_HUMAN Isoform 3 of Septin-2 OS=Homo sapiens GN=SEPT2;sp|Q15019-2|SEPT2_HUMAN Isoform 2 of Septin-2 OS=Homo sapiens GN=SEPT2;tr|B5MCX3|B5MCX3_HUMAN Septin-2 OS=Homo sapiens	1812000	464530	676830	1075600	88118	1127800	207860	107740	19	11	8	7	9	2	7	6	3	11	8	7	9	2	7	6	3	41.487	0	51.919	By MS/MS	By MS/MS	By MS/MS	By MS/MS	By MS/MS	By MS/MS	By MS/MS	By matching	45.7	32.1	24.9	38	4.4	28	20.8	10.8	38051000	9755200	14213000	22587000
tr|Q6IPT9|Q6IPT9_HUMANElongationfactor1-alphaOS=HomosapiensGN=EEF1A1PE=2SV=1;tr|Q6IPS9|Q6IPS9_HUMANElongationfactor1-alphaOS=HomosapiensGN=EEF1A1PE=2SV=1;tr|Q6IPN6|Q6IPN6_HUMANElongationfactor1-alphaOS=HomosapiensGN=EEF1A1PE=2SV=1;tr|Q53HR5|Q53HR5_HUMANElongationfactor1-alpha(Fragment)OS=HomosapiensPE=2SV=1;tr|Q53HQ7|Q53HQ7_HUMANElongationfactor1-alpha(Fragment)OS=HomosapiensPE=2SV=1;tr|Q53HM9|Q5…	tr|Q6IPT9|Q6IPT9_HUMAN Elongation factor 1-alpha OS=Homo sapiens GN=EEF1A1 PE=2 SV=1;tr|Q6IPS9|Q6IPS9_HUMAN Elongation factor 1-alpha OS=Homo sapiens GN=EEF1A1 PE=2 SV=1;tr|Q6IPN6|Q6IPN6_HUMAN Elongation factor 1-alpha OS=Homo sapiens GN=EEF1A1 PE=2 SV=1;t	1787900	530850	719010	1991200	39999	4342300	581560	846640	37	14	10	9	13	7	13	12	9	7	3	3	6	1	6	5	3	50.184	0	26.758	By MS/MS	By MS/MS	By MS/MS	By MS/MS	By matching	By MS/MS	By MS/MS	By MS/MS	38.7	26.4	23.2	38.7	14.1	38.5	32.5	22.7	37545000	11148000	15099000	41816000
sp|P01023|A2MG_HUMANAlpha-2-macroglobulinOS=HomosapiensGN=A2MPE=1SV=3;CON__ENSEMBL:ENSBTAP00000024146;tr|F8W7L3|F8W7L3_HUMANAlpha-2-macroglobulin(Fragment)OS=HomosapiensGN=A2MPE=1SV=1;sp|P20742-2|PZP_HUMANIsoform2ofPregnancyzoneproteinOS=HomosapiensGN=PZP;tr|B2R950|B2R950_HUMANcDNA,FLJ94213,highlysimilartoHomosapienspregnancy-zoneprotein(PZP),mRNAOS=HomosapiensPE=2SV=1;sp|P20742|PZP_HUMANPregnanc…	sp|P01023|A2MG_HUMAN Alpha-2-macroglobulin OS=Homo sapiens GN=A2M PE=1 SV=3	1783800	623230	1098000	1977600	221830	989470	779370	1193800	9	45	32	28	43	17	29	33	28	45	32	28	43	17	29	33	28	163.29	0	199.66	By MS/MS	By MS/MS	By MS/MS	By MS/MS	By MS/MS	By MS/MS	By MS/MS	By MS/MS	42.1	29.4	25.1	41.2	14.4	27.8	32.8	26.1	128440000	44872000	79054000	142390000
sp|P35611-2|ADDA_HUMANIsoform2ofAlpha-adducinOS=HomosapiensGN=ADD1;tr|E7EV99|E7EV99_HUMANAlpha-adducinOS=HomosapiensGN=ADD1PE=1SV=1;sp|P35611-6|ADDA_HUMANIsoform6ofAlpha-adducinOS=HomosapiensGN=ADD1;tr|E7ENY0|E7ENY0_HUMANAlpha-adducinOS=HomosapiensGN=ADD1PE=1SV=1;sp|P35611|ADDA_HUMANAlpha-adducinOS=HomosapiensGN=ADD1PE=1SV=2;sp|P35611-3|ADDA_HUMANIsoform3ofAlpha-adducinOS=HomosapiensGN=ADD1;tr|Q4…	sp|P35611-2|ADDA_HUMAN Isoform 2 of Alpha-adducin OS=Homo sapiens GN=ADD1;tr|E7EV99|E7EV99_HUMAN Alpha-adducin OS=Homo sapiens GN=ADD1 PE=1 SV=1;sp|P35611-6|ADDA_HUMAN Isoform 6 of Alpha-adducin OS=Homo sapiens GN=ADD1;tr|E7ENY0|E7ENY0_HUMAN Alpha-adducin	1781200	2865400	4462300	4625900	1121400	7131700	1151500	601390	17	18	18	19	18	17	24	18	15	1	1	1	1	1	1	1	1	69.984	0	86.741	By MS/MS	By MS/MS	By MS/MS	By MS/MS	By MS/MS	By MS/MS	By MS/MS	By MS/MS	42.9	35.3	35.3	44.7	32.6	50.1	33.6	28.7	46311000	74500000	116020000	120270000
tr|A8YXX4|A8YXX4_HUMANGlutaminesynthetaseOS=HomosapiensGN=PIG59PE=2SV=1;sp|P15104|GLNA_HUMANGlutaminesynthetaseOS=HomosapiensGN=GLULPE=1SV=4;tr|B4DWM6|B4DWM6_HUMANcDNAFLJ57219,highlysimilartoGlutaminesynthetase(EC6.3.1.2)OS=HomosapiensPE=2SV=1;tr|A1L199|A1L199_HUMANGlutaminesynthetase(Fragment)OS=HomosapiensGN=GLULPE=2SV=1;tr|Q9NSP3|Q9NSP3_HUMANUncharacterizedproteinDKFZp434M0813OS=HomosapiensGN=…	tr|A8YXX4|A8YXX4_HUMAN Glutamine synthetase OS=Homo sapiens GN=PIG59 PE=2 SV=1;sp|P15104|GLNA_HUMAN Glutamine synthetase OS=Homo sapiens GN=GLUL PE=1 SV=4;tr|B4DWM6|B4DWM6_HUMAN cDNA FLJ57219, highly similar to Glutamine synthetase (EC 6.3.1.2) OS=Homo sap	1774300	6537600	4381100	10316000	2612600	17300000	4677600	1658200	6	13	13	12	12	8	14	12	7	13	13	12	12	8	14	12	7	42.064	0	195.54	By MS/MS	By MS/MS	By MS/MS	By MS/MS	By MS/MS	By MS/MS	By MS/MS	By MS/MS	37.8	33	32.7	33.5	26.3	40.8	35.7	23.9	26615000	98065000	65717000	154740000
tr|J3KQA0|J3KQA0_HUMANSynaptotagminI,isoformCRA_bOS=HomosapiensGN=SYT1PE=1SV=1;tr|A0A024RBE9|A0A024RBE9_HUMANSynaptotagminI,isoformCRA_aOS=HomosapiensGN=SYT1PE=4SV=1;sp|P21579|SYT1_HUMANSynaptotagmin-1OS=HomosapiensGN=SYT1PE=1SV=1;tr|A0A024R4N8|A0A024R4N8_HUMANSynaptotagminV,isoformCRA_aOS=HomosapiensGN=SYT5PE=4SV=1;sp|O00445|SYT5_HUMANSynaptotagmin-5OS=HomosapiensGN=SYT5PE=1SV=2;tr|Q05BS5|Q05BS5…	tr|J3KQA0|J3KQA0_HUMAN Synaptotagmin I, isoform CRA_b OS=Homo sapiens GN=SYT1 PE=1 SV=1;tr|A0A024RBE9|A0A024RBE9_HUMAN Synaptotagmin I, isoform CRA_a OS=Homo sapiens GN=SYT1 PE=4 SV=1;sp|P21579|SYT1_HUMAN Synaptotagmin-1 OS=Homo sapiens GN=SYT1 PE=1 SV=1	1763700	10896000	7677800	12272000	1448500	20978000	7226100	1681100	10	19	18	18	20	12	25	20	13	15	13	12	15	8	18	15	9	47.26	0	64.645	By MS/MS	By MS/MS	By MS/MS	By MS/MS	By MS/MS	By MS/MS	By MS/MS	By MS/MS	39.1	41.5	39.6	41.5	30.3	50.6	45.3	32.2	35275000	217920000	153560000	245450000
tr|B1AKY9|B1AKY9_HUMANSodium/potassium-transportingATPasesubunitalphaOS=HomosapiensGN=ATP1A2PE=1SV=1;tr|A0A0S2Z3W6|A0A0S2Z3W6_HUMANSodium/potassium-transportingATPasesubunitalpha(Fragment)OS=HomosapiensGN=ATP1A2PE=2SV=1;sp|P50993|AT1A2_HUMANSodium/potassium-transportingATPasesubunitalpha-2OS=HomosapiensGN=ATP1A2PE=1SV=1;tr|B2RAQ4|B2RAQ4_HUMANSodium/potassium-transportingATPasesubunitalphaOS=Homos…	tr|B1AKY9|B1AKY9_HUMAN Sodium/potassium-transporting ATPase subunit alpha OS=Homo sapiens GN=ATP1A2 PE=1 SV=1;tr|A0A0S2Z3W6|A0A0S2Z3W6_HUMAN Sodium/potassium-transporting ATPase subunit alpha (Fragment) OS=Homo sapiens GN=ATP1A2 PE=2 SV=1;sp|P50993|AT1A2_H	1750100	3226000	4976300	6350500	1701800	7707200	1771400	660410	12	44	39	40	44	38	41	39	33	26	21	21	24	21	24	23	16	110.86	0	97.886	By MS/MS	By MS/MS	By MS/MS	By MS/MS	By MS/MS	By MS/MS	By MS/MS	By MS/MS	47.1	39.2	39.9	46.7	40.4	41.9	40.6	36.6	84003000	154850000	238860000	304820000
tr|C9JAI6|C9JAI6_HUMANCKLF-likeMARVELtransmembranedomain-containingprotein5OS=HomosapiensGN=CMTM5PE=1SV=1;sp|Q96DZ9-3|CKLF5_HUMANIsoform3ofCKLF-likeMARVELtransmembranedomain-containingprotein5OS=HomosapiensGN=CMTM5;sp|Q96DZ9-2|CKLF5_HUMANIsoform2ofCKLF-likeMARVELtransmembranedomain-containingprotein5OS=HomosapiensGN=CMTM5;sp|Q96DZ9-4|CKLF5_HUMANIsoform4ofCKLF-likeMARVELtransmembranedomain-contain…	tr|C9JAI6|C9JAI6_HUMAN CKLF-like MARVEL transmembrane domain-containing protein 5 OS=Homo sapiens GN=CMTM5 PE=1 SV=1;sp|Q96DZ9-3|CKLF5_HUMAN Isoform 3 of CKLF-like MARVEL transmembrane domain-containing protein 5 OS=Homo sapiens GN=CMTM5;sp|Q96DZ9-2|CKLF5_	1724600	584550	1564500	2402600	187870	1011900	62753	72614	8	4	2	2	5	2	2	1	1	4	2	2	5	2	2	1	1	13.238	0	9.817	By MS/MS	By MS/MS	By MS/MS	By MS/MS	By matching	By MS/MS	By MS/MS	By MS/MS	35.6	27.1	27.1	36.4	27.1	27.1	16.1	11	12072000	4091900	10952000	16818000
tr|Q6FGJ9|Q6FGJ9_HUMANGlutathioneS-transferaseOS=HomosapiensGN=GSTM3PE=1SV=1;sp|P21266|GSTM3_HUMANGlutathioneS-transferaseMu3OS=HomosapiensGN=GSTM3PE=1SV=3;tr|A0A0A0MTN3|A0A0A0MTN3_HUMANGlutathioneS-transferaseOS=HomosapiensGN=GSTM3PE=1SV=1;tr|Q59EJ5|Q59EJ5_HUMANGlutathioneS-transferase(Fragment)OS=HomosapiensPE=2SV=1;tr|A4UJ43|A4UJ43_HUMANGlutathioneS-transferaseOS=HomosapiensGN=GSTM3PE=2SV=1;tr…	tr|Q6FGJ9|Q6FGJ9_HUMAN Glutathione S-transferase OS=Homo sapiens GN=GSTM3 PE=1 SV=1;sp|P21266|GSTM3_HUMAN Glutathione S-transferase Mu 3 OS=Homo sapiens GN=GSTM3 PE=1 SV=3;tr|A0A0A0MTN3|A0A0A0MTN3_HUMAN Glutathione S-transferase OS=Homo sapiens GN=GSTM3 PE	1716200	1676200	491750	1785900	241140	803610	2753900	3614000	8	13	10	7	11	5	7	12	9	12	9	6	10	4	6	11	8	26.559	0	23.267	By MS/MS	By MS/MS	By MS/MS	By MS/MS	By MS/MS	By MS/MS	By MS/MS	By MS/MS	53.8	41.3	27.1	47.6	21.8	24.9	52.9	36.9	29175000	28496000	8359800	30360000
sp|P22314-2|UBA1_HUMANIsoform2ofUbiquitin-likemodifier-activatingenzyme1OS=HomosapiensGN=UBA1;tr|A0A024R1A3|A0A024R1A3_HUMANTesticularsecretoryproteinLi63OS=HomosapiensGN=UBE1PE=2SV=1;sp|P22314|UBA1_HUMANUbiquitin-likemodifier-activatingenzyme1OS=HomosapiensGN=UBA1PE=1SV=3;tr|B4DDE4|B4DDE4_HUMANcDNAFLJ54582,highlysimilartoUbiquitin-activatingenzymeE1OS=HomosapiensPE=2SV=1;tr|B4DL67|B4DL67_HUMANcD…	sp|P22314-2|UBA1_HUMAN Isoform 2 of Ubiquitin-like modifier-activating enzyme 1 OS=Homo sapiens GN=UBA1;tr|A0A024R1A3|A0A024R1A3_HUMAN Testicular secretory protein Li 63 OS=Homo sapiens GN=UBE1 PE=2 SV=1;sp|P22314|UBA1_HUMAN Ubiquitin-like modifier-activat	1708500	1434500	1760500	1908500	715100	2989600	1214800	3662800	14	29	18	15	25	12	20	25	22	29	18	15	25	12	20	25	22	113.8	0	188.58	By MS/MS	By MS/MS	By MS/MS	By MS/MS	By MS/MS	By MS/MS	By MS/MS	By MS/MS	40	23.7	21.4	34.4	16	25.9	33.8	30.7	87133000	73158000	89786000	97335000
tr|A0A0K0K1H8|A0A0K0K1H8_HUMANEpididymissecretoryspermbindingproteinLi71pOS=HomosapiensGN=HEL-S-71pPE=2SV=1;tr|H7C5E8|H7C5E8_HUMANSerotransferrin(Fragment)OS=HomosapiensGN=TFPE=1SV=1;tr|B4DEX9|B4DEX9_HUMANcDNAFLJ56687,highlysimilartoSerotransferrinOS=HomosapiensPE=2SV=1;tr|F8WEK9|F8WEK9_HUMANSerotransferrinOS=HomosapiensGN=TFPE=1SV=1;tr|F8WCI6|F8WCI6_HUMANSerotransferrinOS=HomosapiensGN=TFPE=1SV=…	tr|A0A0K0K1H8|A0A0K0K1H8_HUMAN Epididymis secretory sperm binding protein Li 71p OS=Homo sapiens GN=HEL-S-71p PE=2 SV=1	1705600	138190	622870	1126600	55310	157610	472890	2031800	10	27	8	13	22	3	5	20	25	0	0	0	0	0	0	1	1	77.079	0	133.22	By MS/MS	By MS/MS	By MS/MS	By MS/MS	By MS/MS	By MS/MS	By MS/MS	By MS/MS	44.7	15.6	23.4	41	5.3	8.9	31.5	41.1	69930000	5665800	25538000	46190000
sp|P20916-3|MAG_HUMANIsoform3ofMyelin-associatedglycoproteinOS=HomosapiensGN=MAG;tr|Q53HD1|Q53HD1_HUMANMyelinassociatedglycoproteinisoformavariant(Fragment)OS=HomosapiensPE=2SV=1;tr|Q53HA1|Q53HA1_HUMANMyelinassociatedglycoproteinisoformavariant(Fragment)OS=HomosapiensPE=2SV=1;tr|Q53ES7|Q53ES7_HUMANMyelinassociatedglycoproteinisoformavariant(Fragment)OS=HomosapiensPE=2SV=1;sp|P20916|MAG_HUMANMyeli…	sp|P20916-3|MAG_HUMAN Isoform 3 of Myelin-associated glycoprotein OS=Homo sapiens GN=MAG;tr|Q53HD1|Q53HD1_HUMAN Myelin associated glycoprotein isoform a variant (Fragment) OS=Homo sapiens PE=2 SV=1;tr|Q53HA1|Q53HA1_HUMAN Myelin associated glycoprotein isof	1703100	118390	1497600	1725100	157110	502300	526230	882890	9	11	3	6	9	4	6	6	5	11	3	6	9	4	6	6	5	66.223	0	35.674	By MS/MS	By MS/MS	By MS/MS	By MS/MS	By MS/MS	By MS/MS	By MS/MS	By MS/MS	23.1	5.2	10.6	19.5	6.8	10.6	10.6	8.7	40875000	2841300	35941000	41402000
tr|A0A024R8M0|A0A024R8M0_HUMANGuaninenucleotidebindingprotein(Gprotein),alpha13,isoformCRA_aOS=HomosapiensGN=GNA13PE=4SV=1;sp|Q14344|GNA13_HUMANGuaninenucleotide-bindingproteinsubunitalpha-13OS=HomosapiensGN=GNA13PE=1SV=2;tr|B4DWV9|B4DWV9_HUMANcDNAFLJ53108,highlysimilartoGuaninenucleotide-bindingproteinalpha-13subunitOS=HomosapiensPE=2SV=1;sp|Q14344-2|GNA13_HUMANIsoform2ofGuaninenucleotide-bindin…	tr|A0A024R8M0|A0A024R8M0_HUMAN Guanine nucleotide binding protein (G protein), alpha 13, isoform CRA_a OS=Homo sapiens GN=GNA13 PE=4 SV=1;sp|Q14344|GNA13_HUMAN Guanine nucleotide-binding protein subunit alpha-13 OS=Homo sapiens GN=GNA13 PE=1 SV=2;tr|B4DWV9	1701300	174220	207790	1216000	27648	308120	204840	1694700	4	14	4	5	13	2	5	7	8	14	4	5	13	2	5	7	8	44.049	0	72.251	By MS/MS	By MS/MS	By MS/MS	By MS/MS	By matching	By MS/MS	By MS/MS	By MS/MS	47.2	13	15.6	44.6	5.8	14.9	27.1	24.4	40831000	4181200	4986900	29184000
sp|P49327|FAS_HUMANFattyacidsynthaseOS=HomosapiensGN=FASNPE=1SV=3;tr|A0A0U1RQF0|A0A0U1RQF0_HUMANFattyacidsynthaseOS=HomosapiensGN=FASNPE=1SV=1;tr|Q6PJJ3|Q6PJJ3_HUMANFASNprotein(Fragment)OS=HomosapiensGN=FASNPE=2SV=1;tr|A0A0U1RRG3|A0A0U1RRG3_HUMANFattyacidsynthase(Fragment)OS=HomosapiensGN=FASNPE=1SV=1;tr|A0A1B0GTR5|A0A1B0GTR5_HUMANFattyacidsynthase(Fragment)OS=HomosapiensGN=FASNPE=1SV=1;tr|Q13587…	sp|P49327|FAS_HUMAN Fatty acid synthase OS=Homo sapiens GN=FASN PE=1 SV=3;tr|A0A0U1RQF0|A0A0U1RQF0_HUMAN Fatty acid synthase OS=Homo sapiens GN=FASN PE=1 SV=1	1694500	1120500	1723500	2560800	239340	1761900	333830	171150	7	75	60	58	76	37	59	42	25	75	60	58	76	37	59	42	25	273.42	0	256.43	By MS/MS	By MS/MS	By MS/MS	By MS/MS	By MS/MS	By MS/MS	By MS/MS	By MS/MS	39.7	29.2	27.6	40.3	15.5	30.1	19	10.8	211820000	140070000	215440000	320100000
tr|X6RKN2|X6RKN2_HUMANNeurofascin(Fragment)OS=HomosapiensGN=NFASCPE=1SV=1;sp|O94856-11|NFASC_HUMANIsoform11ofNeurofascinOS=HomosapiensGN=NFASC;sp|O94856-6|NFASC_HUMANIsoform6ofNeurofascinOS=HomosapiensGN=NFASC;sp|O94856-7|NFASC_HUMANIsoform7ofNeurofascinOS=HomosapiensGN=NFASC;sp|O94856-13|NFASC_HUMANIsoform13ofNeurofascinOS=HomosapiensGN=NFASC;sp|O94856|NFASC_HUMANNeurofascinOS=HomosapiensGN=NFAS…	tr|X6RKN2|X6RKN2_HUMAN Neurofascin (Fragment) OS=Homo sapiens GN=NFASC PE=1 SV=1;sp|O94856-11|NFASC_HUMAN Isoform 11 of Neurofascin OS=Homo sapiens GN=NFASC;sp|O94856-6|NFASC_HUMAN Isoform 6 of Neurofascin OS=Homo sapiens GN=NFASC;sp|O94856-7|NFASC_HUMAN I	1655100	1203000	3607500	3971700	438290	2793000	646390	729950	16	34	27	31	35	21	29	25	21	5	4	6	6	3	4	4	4	131.13	0	150.28	By MS/MS	By MS/MS	By MS/MS	By MS/MS	By MS/MS	By MS/MS	By MS/MS	By MS/MS	31.8	26.2	29.4	31.6	20	28.7	26.4	21.6	92687000	67365000	202020000	222410000
sp|O95858|TSN15_HUMANTetraspanin-15OS=HomosapiensGN=TSPAN15PE=1SV=1;tr|H7C285|H7C285_HUMANTetraspanin-15(Fragment)OS=HomosapiensGN=TSPAN15PE=1SV=1	sp|O95858|TSN15_HUMAN Tetraspanin-15 OS=Homo sapiens GN=TSPAN15 PE=1 SV=1;tr|H7C285|H7C285_HUMAN Tetraspanin-15 (Fragment) OS=Homo sapiens GN=TSPAN15 PE=1 SV=1	1654700	602380	1233800	1916800	65470	666020	360670	247090	2	7	6	6	6	3	4	5	4	7	6	6	6	3	4	5	4	33.165	0	17.54	By MS/MS	By MS/MS	By MS/MS	By MS/MS	By matching	By MS/MS	By MS/MS	By MS/MS	31.6	28.9	28.9	28.9	13.6	15.6	21.1	17	19856000	7228600	14806000	23002000
sp|Q99572|P2RX7_HUMANP2Xpurinoceptor7OS=HomosapiensGN=P2RX7PE=1SV=4;tr|Q0IJ51|Q0IJ51_HUMANp2Xpurinoceptor(Fragment)OS=HomosapiensGN=P2RX7PE=2SV=1;tr|C6KE32|C6KE32_HUMANp2XpurinoceptorOS=HomosapiensGN=P2RX7PE=1SV=1;sp|Q99572-8|P2RX7_HUMANIsoformHofP2Xpurinoceptor7OS=HomosapiensGN=P2RX7;sp|Q99572-4|P2RX7_HUMANIsoformDofP2Xpurinoceptor7OS=HomosapiensGN=P2RX7;sp|Q99572-6|P2RX7_HUMANIsoformFofP2Xpurin…	sp|Q99572|P2RX7_HUMAN P2X purinoceptor 7 OS=Homo sapiens GN=P2RX7 PE=1 SV=4;tr|Q0IJ51|Q0IJ51_HUMAN p2X purinoceptor (Fragment) OS=Homo sapiens GN=P2RX7 PE=2 SV=1;tr|C6KE32|C6KE32_HUMAN p2X purinoceptor OS=Homo sapiens GN=P2RX7 PE=1 SV=1;sp|Q99572-8|P2RX7_H	1653100	1706100	2440100	2928000	450740	1033700	153830	690700	19	18	14	12	16	7	7	6	8	18	14	12	16	7	7	6	8	68.584	0	38.607	By MS/MS	By MS/MS	By MS/MS	By MS/MS	By MS/MS	By MS/MS	By MS/MS	By MS/MS	31.4	24.9	23.9	28.2	12.6	15	11.3	15.5	52901000	54594000	78083000	93696000
sp|P56134-3|ATPK_HUMANIsoform3ofATPsynthasesubunitf,mitochondrialOS=HomosapiensGN=ATP5J2;sp|P56134|ATPK_HUMANATPsynthasesubunitf,mitochondrialOS=HomosapiensGN=ATP5J2PE=1SV=3;tr|Q53FE1|Q53FE1_HUMANATPsynthase,H+transporting,mitochondrialF0complex,subunitfisoform2avariant(Fragment)OS=HomosapiensPE=2SV=1	sp|P56134-3|ATPK_HUMAN Isoform 3 of ATP synthase subunit f, mitochondrial OS=Homo sapiens GN=ATP5J2;sp|P56134|ATPK_HUMAN ATP synthase subunit f, mitochondrial OS=Homo sapiens GN=ATP5J2 PE=1 SV=3;tr|Q53FE1|Q53FE1_HUMAN ATP synthase, H+ transporting, mitocho	1636900	7634200	1526200	6871100	1060000	11897000	173190	92924	3	4	5	3	4	3	4	3	1	2	3	1	2	2	2	2	1	6.2953	0	10.597	By MS/MS	By MS/MS	By MS/MS	By MS/MS	By MS/MS	By MS/MS	By MS/MS	By matching	70.9	72.7	70.9	70.9	50.9	70.9	50.9	27.3	4910700	22903000	4578600	20613000
tr|X5DQV1|X5DQV1_HUMANCollapsinresponsemediatorprotein1isoformB(Fragment)OS=HomosapiensGN=CRMP1PE=2SV=1;tr|X5DNI1|X5DNI1_HUMANCollapsinresponsemediatorprotein1isoformA(Fragment)OS=HomosapiensGN=CRMP1PE=2SV=1;sp|Q14194-2|DPYL1_HUMANIsoformLCRMP-1ofDihydropyrimidinase-relatedprotein1OS=HomosapiensGN=CRMP1	tr|X5DQV1|X5DQV1_HUMAN Collapsin response mediator protein 1 isoform B (Fragment) OS=Homo sapiens GN=CRMP1 PE=2 SV=1;tr|X5DNI1|X5DNI1_HUMAN Collapsin response mediator protein 1 isoform A (Fragment) OS=Homo sapiens GN=CRMP1 PE=2 SV=1;sp|Q14194-2|DPYL1_HUMA	1626600	1319000	2308300	4043100	541570	4052500	2065500	2654600	3	24	20	21	27	15	21	21	19	0	0	0	1	0	0	0	0	70.906	0	83.417	By MS/MS	By MS/MS	By MS/MS	By MS/MS	By MS/MS	By MS/MS	By MS/MS	By MS/MS	55.1	40.8	43.8	60	30.4	43.5	46.7	38.8	63437000	51441000	90025000	157680000
sp|P55084-2|ECHB_HUMANIsoform2ofTrifunctionalenzymesubunitbeta,mitochondrialOS=HomosapiensGN=HADHB;sp|P55084|ECHB_HUMANTrifunctionalenzymesubunitbeta,mitochondrialOS=HomosapiensGN=HADHBPE=1SV=3;tr|B4DY96|B4DY96_HUMANcDNAFLJ55769,highlysimilartoTrifunctionalenzymesubunitbeta,mitochondrialOS=HomosapiensPE=2SV=1;tr|F5GZQ3|F5GZQ3_HUMANTrifunctionalenzymesubunitbeta,mitochondrialOS=HomosapiensGN=HADHB…	sp|P55084-2|ECHB_HUMAN Isoform 2 of Trifunctional enzyme subunit beta, mitochondrial OS=Homo sapiens GN=HADHB;sp|P55084|ECHB_HUMAN Trifunctional enzyme subunit beta, mitochondrial OS=Homo sapiens GN=HADHB PE=1 SV=3;tr|B4DY96|B4DY96_HUMAN cDNA FLJ55769, hig	1615000	1386600	1533200	1591600	382870	1412600	407540	321830	11	18	8	8	16	6	7	7	5	18	8	8	16	6	7	7	5	48.879	0	33.071	By MS/MS	By MS/MS	By MS/MS	By MS/MS	By MS/MS	By MS/MS	By MS/MS	By MS/MS	54.2	17.5	17.5	43.1	13.3	15.7	15.7	10.4	37144000	31891000	35263000	36607000
sp|P49189|AL9A1_HUMAN4-trimethylaminobutyraldehydedehydrogenaseOS=HomosapiensGN=ALDH9A1PE=1SV=3;tr|B4DE91|B4DE91_HUMANcDNAFLJ55534,highlysimilarto4-trimethylaminobutyraldehydedehydrogenase(EC1.2.1.47)OS=HomosapiensPE=2SV=1;tr|B9EKV4|B9EKV4_HUMANAldehydedehydrogenase9family,memberA1OS=HomosapiensGN=ALDH9A1PE=2SV=1;tr|B4DX14|B4DX14_HUMANcDNAFLJ53231,highlysimilarto4-trimethylaminobutyraldehydedehyd…	sp|P49189|AL9A1_HUMAN 4-trimethylaminobutyraldehyde dehydrogenase OS=Homo sapiens GN=ALDH9A1 PE=1 SV=3;tr|B4DE91|B4DE91_HUMAN cDNA FLJ55534, highly similar to 4-trimethylaminobutyraldehyde dehydrogenase (EC 1.2.1.47) OS=Homo sapiens PE=2 SV=1;tr|B9EKV4|B9E	1598900	787690	1683100	2136800	370850	1764400	1214300	1805400	6	14	12	11	13	7	10	13	13	14	12	11	13	7	10	13	13	53.801	0	43.676	By MS/MS	By MS/MS	By MS/MS	By MS/MS	By MS/MS	By MS/MS	By MS/MS	By MS/MS	35.6	28.5	26.1	30	14.6	23.7	35.2	29.4	39972000	19692000	42076000	53420000
tr|B4DV28|B4DV28_HUMANcDNAFLJ54170,highlysimilartoCytosolicnonspecificdipeptidaseOS=HomosapiensPE=2SV=1;sp|Q96KP4|CNDP2_HUMANCytosolicnon-specificdipeptidaseOS=HomosapiensGN=CNDP2PE=1SV=2;sp|Q96KP4-2|CNDP2_HUMANIsoform2ofCytosolicnon-specificdipeptidaseOS=HomosapiensGN=CNDP2;tr|A0A024R382|A0A024R382_HUMANCNDPdipeptidase2(MetallopeptidaseM20family),isoformCRA_dOS=HomosapiensGN=CNDP2PE=4SV=1;tr|B4D…	tr|B4DV28|B4DV28_HUMAN cDNA FLJ54170, highly similar to Cytosolic nonspecific dipeptidase OS=Homo sapiens PE=2 SV=1;sp|Q96KP4|CNDP2_HUMAN Cytosolic non-specific dipeptidase OS=Homo sapiens GN=CNDP2 PE=1 SV=2;sp|Q96KP4-2|CNDP2_HUMAN Isoform 2 of Cytosolic n	1574500	913890	1861900	1646800	338510	813870	342320	827290	24	17	10	9	15	6	8	7	6	17	10	9	15	6	8	7	6	51.501	0	42.484	By MS/MS	By MS/MS	By MS/MS	By MS/MS	By MS/MS	By MS/MS	By MS/MS	By MS/MS	47.9	29.8	25.7	39.1	16.6	22.7	20.5	17.5	42512000	24675000	50272000	44463000
tr|Q8NCL6|Q8NCL6_HUMANcDNAFLJ90170fis,cloneMAMMA1000370,highlysimilartoIgalpha-1chainCregionOS=HomosapiensPE=2SV=1;sp|P01876|IGHA1_HUMANImmunoglobulinheavyconstantalpha1OS=HomosapiensGN=IGHA1PE=1SV=2;tr|Q9UP60|Q9UP60_HUMANSNC73proteinOS=HomosapiensGN=SNC73PE=2SV=1;tr|Q96K68|Q96K68_HUMANcDNAFLJ14473fis,cloneMAMMA1001080,highlysimilartoHomosapiensSNC73protein(SNC73)mRNAOS=HomosapiensPE=2SV=1;tr|Q6M…	tr|Q8NCL6|Q8NCL6_HUMAN cDNA FLJ90170 fis, clone MAMMA1000370, highly similar to Ig alpha-1 chain C region OS=Homo sapiens PE=2 SV=1;sp|P01876|IGHA1_HUMAN Immunoglobulin heavy constant alpha 1 OS=Homo sapiens GN=IGHA1 PE=1 SV=2;tr|Q9UP60|Q9UP60_HUMAN SNC73	1568200	2018200	587700	640180	126100	141150	312530	85782	18	8	6	4	5	3	2	5	3	0	0	0	0	0	0	1	0	53.224	0	20.321	By MS/MS	By MS/MS	By MS/MS	By MS/MS	By MS/MS	By MS/MS	By MS/MS	By matching	27.8	17.4	9.7	15.8	6.3	5.3	11.6	6.3	37636000	48437000	14105000	15364000
tr|A0A024R6G4|A0A024R6G4_HUMANAldehydedehydrogenase6family,memberA1,isoformCRA_bOS=HomosapiensGN=ALDH6A1PE=2SV=1;sp|Q02252|MMSA_HUMANMethylmalonate-semialdehydedehydrogenase[acylating],mitochondrialOS=HomosapiensGN=ALDH6A1PE=1SV=2;sp|Q02252-2|MMSA_HUMANIsoform2ofMethylmalonate-semialdehydedehydrogenase[acylating],mitochondrialOS=HomosapiensGN=ALDH6A1;tr|Q53FN8|Q53FN8_HUMANAldehydedehydrogenase6A1…	tr|A0A024R6G4|A0A024R6G4_HUMAN Aldehyde dehydrogenase 6 family, member A1, isoform CRA_b OS=Homo sapiens GN=ALDH6A1 PE=2 SV=1;sp|Q02252|MMSA_HUMAN Methylmalonate-semialdehyde dehydrogenase [acylating], mitochondrial OS=Homo sapiens GN=ALDH6A1 PE=1 SV=2;sp|	1561200	1212000	1469300	2136000	213020	1468800	919010	2012600	7	16	12	9	15	5	12	11	12	16	12	9	15	5	12	11	12	57.839	0	42.009	By MS/MS	By MS/MS	By MS/MS	By MS/MS	By MS/MS	By MS/MS	By MS/MS	By MS/MS	38.3	20.9	18.9	35.7	10.8	29	26.2	25.8	43714000	33937000	41141000	59808000
sp|Q13509|TBB3_HUMANTubulinbeta-3chainOS=HomosapiensGN=TUBB3PE=1SV=2;tr|Q9BV28|Q9BV28_HUMANTubulinbetachain(Fragment)OS=HomosapiensGN=TUBB3PE=2SV=2;tr|B2RBD5|B2RBD5_HUMANTubulinbetachainOS=HomosapiensPE=2SV=1;tr|Q53G92|Q53G92_HUMANTubulinbetachain(Fragment)OS=HomosapiensPE=2SV=1;tr|A0A0B4J269|A0A0B4J269_HUMANUncharacterizedproteinOS=HomosapiensPE=1SV=1;sp|Q13509-2|TBB3_HUMANIsoform2ofTubulinbeta-…	sp|Q13509|TBB3_HUMAN Tubulin beta-3 chain OS=Homo sapiens GN=TUBB3 PE=1 SV=2;tr|Q9BV28|Q9BV28_HUMAN Tubulin beta chain (Fragment) OS=Homo sapiens GN=TUBB3 PE=2 SV=2;tr|B2RBD5|B2RBD5_HUMAN Tubulin beta chain OS=Homo sapiens PE=2 SV=1;tr|Q53G92|Q53G92_HUMAN	1551700	1341400	2382800	2463100	454580	10875000	4492000	6151800	14	23	17	18	23	15	23	21	17	5	2	2	5	1	6	4	2	50.432	0	53.441	By MS/MS	By MS/MS	By MS/MS	By MS/MS	By MS/MS	By MS/MS	By MS/MS	By MS/MS	62	40.4	40.7	62	34.7	60.7	53.6	40.4	31033000	26829000	47656000	49262000
tr|B1AKK2|B1AKK2_HUMANDimethylargininedimethylaminohydrolase1,isoformCRA_bOS=HomosapiensGN=DDAH1PE=2SV=1;sp|O94760|DDAH1_HUMANN(G),N(G)-dimethylargininedimethylaminohydrolase1OS=HomosapiensGN=DDAH1PE=1SV=3;tr|B4E3V1|B4E3V1_HUMANcDNAFLJ61209,highlysimilartoNG,NG-dimethylargininedimethylaminohydrolase1(EC3.5.3.18)OS=HomosapiensPE=2SV=1;sp|O94760-2|DDAH1_HUMANIsoform2ofN(G),N(G)-dimethylargininedime…	tr|B1AKK2|B1AKK2_HUMAN Dimethylarginine dimethylaminohydrolase 1, isoform CRA_b OS=Homo sapiens GN=DDAH1 PE=2 SV=1;sp|O94760|DDAH1_HUMAN N(G),N(G)-dimethylarginine dimethylaminohydrolase 1 OS=Homo sapiens GN=DDAH1 PE=1 SV=3;tr|B4E3V1|B4E3V1_HUMAN cDNA FLJ6	1551600	1373100	494680	1803100	753340	1373500	2102300	3153100	6	9	7	3	9	5	8	10	10	9	7	3	9	5	8	10	10	31.121	0	49.432	By MS/MS	By MS/MS	By MS/MS	By MS/MS	By MS/MS	By MS/MS	By MS/MS	By MS/MS	37.9	31.2	13.3	37.9	20.7	37.9	39.3	44.9	26377000	23343000	8409600	30652000
sp|Q9P2U8|VGLU2_HUMANVesicularglutamatetransporter2OS=HomosapiensGN=SLC17A6PE=2SV=1;tr|B4DGA8|B4DGA8_HUMANcDNAFLJ59823,highlysimilartoHomosapienssolutecarrierfamily17(sodium-dependentinorganicphosphatecotransporter),member6,mRNAOS=HomosapiensPE=2SV=1	sp|Q9P2U8|VGLU2_HUMAN Vesicular glutamate transporter 2 OS=Homo sapiens GN=SLC17A6 PE=2 SV=1;tr|B4DGA8|B4DGA8_HUMAN cDNA FLJ59823, highly similar to Homo sapiens solute carrier family 17 (sodium-dependent inorganic phosphate cotransporter), member 6, mRNA	1515500	9513300	5209400	7990700	1017900	14631000	2479500	353070	2	9	16	15	10	7	17	17	2	6	13	12	7	6	14	14	1	64.392	0	67.708	By MS/MS	By MS/MS	By MS/MS	By MS/MS	By MS/MS	By MS/MS	By MS/MS	By MS/MS	20.1	27.7	25.9	20.1	11.2	33.7	29.2	2.7	34855000	218810000	119820000	183790000
G9LEU0_HUMANNADH-ubiquinoneoxidoreductasechain5OS=HomosapiensGN=ND5PE=3SV=1;tr|G9LEI6|G9LEI6_HUMANNADH-ubiquinoneoxidoreductasechain5OS=HomosapiensGN=ND5PE=3SV=1;tr|G9LEE7|G9LEE7_HUMANNADH-ubiquinoneoxidoreductasechain5OS=HomosapiensGN=ND5PE=3SV=1;tr|G9LDT9|G9LDT9_HUMANNADH-ubiquinoneoxidoreductasechain5OS=HomosapiensGN=ND5PE=3SV=1;tr|G9LDL1|G9LDL1_HUMANNADH-ubiquinoneoxidoreductasechain5OS=Homos…	1259	1492700	99946	721250	222780	1660400	0	0	1853000	4	4	2	3	2	3	0	0	2	4	2	3	2	3	0	0	21.5	223	21.862	By matching	By MS/MS	By matching	By MS/MS	By MS/MS	By MS/MS			13.9	21.5	13.9	13.9	16.6	13.9	0	0	34266000	11942000	799570	5770000	1782200
sp|Q96DD7|SHSA4_HUMANProteinshisa-4OS=HomosapiensGN=SHISA4PE=2SV=3	sp|Q96DD7|SHSA4_HUMAN Protein shisa-4 OS=Homo sapiens GN=SHISA4 PE=2 SV=3	1489400	2344000	2195000	1720800	298370	4841000	2258900	1065100	1	3	2	2	3	2	3	2	2	3	2	2	3	2	3	2	2	21.522	0	4.82	By MS/MS	By MS/MS	By MS/MS	By MS/MS	By MS/MS	By MS/MS	By MS/MS	By MS/MS	23.9	8.6	8.6	23.9	8.6	23.9	8.6	8.6	8936200	14064000	13170000	10325000
tr|X5D945|X5D945_HUMANHarveyratsarcomaviraloncoproteinisoformA(Fragment)OS=HomosapiensGN=HRASPE=2SV=1;sp|P01112|RASH_HUMANGTPaseHRasOS=HomosapiensGN=HRASPE=1SV=1;sp|P01112-2|RASH_HUMANIsoform2ofGTPaseHRasOS=HomosapiensGN=HRAS;tr|Q92468|Q92468_HUMANp21protein(Fragment)OS=HomosapiensGN=c-bas/hasPE=4SV=1	tr|X5D945|X5D945_HUMAN Harvey rat sarcoma viral oncoprotein isoform A (Fragment) OS=Homo sapiens GN=HRAS PE=2 SV=1;sp|P01112|RASH_HUMAN GTPase HRas OS=Homo sapiens GN=HRAS PE=1 SV=1;sp|P01112-2|RASH_HUMAN Isoform 2 of GTPase HRas OS=Homo sapiens GN=HRAS	1472700	3079900	2170100	2881600	544950	4420700	888490	3495200	4	8	8	5	7	3	5	5	6	2	3	2	2	1	1	1	1	21.298	0	45.482	By MS/MS	By MS/MS	By MS/MS	By MS/MS	By MS/MS	By MS/MS	By MS/MS	By MS/MS	53.4	48.7	31.2	45.5	18.5	39.7	39.7	47.6	14727000	30799000	21701000	28816000
tr|Q8IXW6|Q8IXW6_HUMANDihydropyrimidinase-like3OS=HomosapiensGN=DPYSL3PE=1SV=1;sp|Q14195|DPYL3_HUMANDihydropyrimidinase-relatedprotein3OS=HomosapiensGN=DPYSL3PE=1SV=1;tr|A0A140VK07|A0A140VK07_HUMANTesticularsecretoryproteinLi7OS=HomosapiensPE=2SV=1;sp|Q14195-2|DPYL3_HUMANIsoformLCRMP-4ofDihydropyrimidinase-relatedprotein3OS=HomosapiensGN=DPYSL3;tr|Q6DEN2|Q6DEN2_HUMANDPYSL3proteinOS=HomosapiensGN=…	tr|Q8IXW6|Q8IXW6_HUMAN Dihydropyrimidinase-like 3 OS=Homo sapiens GN=DPYSL3 PE=1 SV=1;sp|Q14195|DPYL3_HUMAN Dihydropyrimidinase-related protein 3 OS=Homo sapiens GN=DPYSL3 PE=1 SV=1;tr|A0A140VK07|A0A140VK07_HUMAN Testicular secretory protein Li 7 OS=Homo s	1429400	466400	1100400	1185300	150610	1000800	889490	964720	9	18	12	14	16	11	13	17	17	14	8	10	12	7	9	12	12	61.979	0	58.703	By MS/MS	By MS/MS	By MS/MS	By MS/MS	By MS/MS	By MS/MS	By MS/MS	By MS/MS	43.7	29.1	33.5	40.4	26.3	30.9	40	40	41453000	13526000	31912000	34373000
tr|A0A024R0Y5|A0A024R0Y5_HUMANATP-dependent6-phosphofructokinaseOS=HomosapiensGN=PFKMPE=2SV=1;sp|P08237|PFKAM_HUMANATP-dependent6-phosphofructokinase,muscletypeOS=HomosapiensGN=PFKMPE=1SV=2;sp|P08237-3|PFKAM_HUMANIsoform3ofATP-dependent6-phosphofructokinase,muscletypeOS=HomosapiensGN=PFKM;tr|A0A0S2Z4A1|A0A0S2Z4A1_HUMANPhosphofructokinasemuscleisoform3(Fragment)OS=HomosapiensGN=PFKMPE=2SV=1;tr|Q96…	tr|A0A024R0Y5|A0A024R0Y5_HUMAN ATP-dependent 6-phosphofructokinase OS=Homo sapiens GN=PFKM PE=2 SV=1;sp|P08237|PFKAM_HUMAN ATP-dependent 6-phosphofructokinase, muscle type OS=Homo sapiens GN=PFKM PE=1 SV=2;sp|P08237-3|PFKAM_HUMAN Isoform 3 of ATP-dependent	1428100	3066300	3010800	3419200	958460	4983400	634180	704600	27	19	20	20	20	17	22	20	13	17	18	18	18	15	20	18	11	85.182	0	121.13	By MS/MS	By MS/MS	By MS/MS	By MS/MS	By MS/MS	By MS/MS	By MS/MS	By MS/MS	32.8	33.6	33.7	35.3	28.3	36.8	32.2	16.5	47126000	101190000	99356000	112840000
tr|E9KL44|E9KL44_HUMANEpididymistissuespermbindingproteinLi14mOS=HomosapiensPE=2SV=1;sp|P40939|ECHA_HUMANTrifunctionalenzymesubunitalpha,mitochondrialOS=HomosapiensGN=HADHAPE=1SV=2;tr|B4DRH6|B4DRH6_HUMANcDNAFLJ54509,highlysimilartoTrifunctionalenzymesubunitalpha,mitochondrialOS=HomosapiensPE=2SV=1;tr|B4DDZ5|B4DDZ5_HUMANcDNAFLJ53969,highlysimilartoTrifunctionalenzymesubunitalpha,mitochondrialOS=Ho…	tr|E9KL44|E9KL44_HUMAN Epididymis tissue sperm binding protein Li 14m OS=Homo sapiens PE=2 SV=1;sp|P40939|ECHA_HUMAN Trifunctional enzyme subunit alpha, mitochondrial OS=Homo sapiens GN=HADHA PE=1 SV=2;tr|B4DRH6|B4DRH6_HUMAN cDNA FLJ54509, highly similar t	1427100	1238400	1645700	1998200	741140	2450300	544970	823880	6	28	20	19	25	14	22	19	14	28	20	19	25	14	22	19	14	82.999	0	173.85	By MS/MS	By MS/MS	By MS/MS	By MS/MS	By MS/MS	By MS/MS	By MS/MS	By MS/MS	51.4	31.2	31.2	45	23.3	36.7	30	23.3	58511000	50774000	67474000	81926000
tr|F8VQX6|F8VQX6_HUMANMethyltransferase-likeprotein7A(Fragment)OS=HomosapiensGN=METTL7APE=1SV=1;tr|H0YI09|H0YI09_HUMANMethyltransferase-likeprotein7A(Fragment)OS=HomosapiensGN=METTL7APE=1SV=1;tr|A0A024R118|A0A024R118_HUMANMethyltransferaselike7A,isoformCRA_aOS=HomosapiensGN=METTL7APE=4SV=1;sp|Q9H8H3|MET7A_HUMANMethyltransferase-likeprotein7AOS=HomosapiensGN=METTL7APE=1SV=1;tr|B4DDW1|B4DDW1_HUMANc…	tr|F8VQX6|F8VQX6_HUMAN Methyltransferase-like protein 7A (Fragment) OS=Homo sapiens GN=METTL7A PE=1 SV=1;tr|H0YI09|H0YI09_HUMAN Methyltransferase-like protein 7A (Fragment) OS=Homo sapiens GN=METTL7A PE=1 SV=1;tr|A0A024R118|A0A024R118_HUMAN Methyltransfera	1424900	2304100	2389300	2243300	832630	3044200	450470	242370	5	3	4	4	3	4	4	3	2	3	4	4	3	4	4	3	2	20.662	0	53.8	By MS/MS	By MS/MS	By MS/MS	By MS/MS	By MS/MS	By MS/MS	By MS/MS	By MS/MS	23.3	30	30	23.3	30	30	23.3	15	14249000	23041000	23893000	22433000
tr|Q6FHJ5|Q6FHJ5_HUMANSecretorycarrier-associatedmembraneprotein(Fragment)OS=HomosapiensGN=SCAMP3PE=2SV=1;sp|O14828|SCAM3_HUMANSecretorycarrier-associatedmembraneprotein3OS=HomosapiensGN=SCAMP3PE=1SV=3;sp|O14828-2|SCAM3_HUMANIsoform2ofSecretorycarrier-associatedmembraneprotein3OS=HomosapiensGN=SCAMP3	tr|Q6FHJ5|Q6FHJ5_HUMAN Secretory carrier-associated membrane protein (Fragment) OS=Homo sapiens GN=SCAMP3 PE=2 SV=1;sp|O14828|SCAM3_HUMAN Secretory carrier-associated membrane protein 3 OS=Homo sapiens GN=SCAMP3 PE=1 SV=3;sp|O14828-2|SCAM3_HUMAN Isoform 2	1421600	8664900	3411000	3302200	517510	6765400	1835100	283080	3	10	9	8	9	4	9	8	3	10	9	8	9	4	9	8	3	38.242	0	43.203	By MS/MS	By MS/MS	By MS/MS	By MS/MS	By MS/MS	By MS/MS	By MS/MS	By matching	39.8	39.8	35.7	31.7	21	35.7	35.2	13	14216000	86649000	34110000	33022000
sp|P81605|DCD_HUMANDermcidinOS=HomosapiensGN=DCDPE=1SV=2;sp|P81605-2|DCD_HUMANIsoform2ofDermcidinOS=HomosapiensGN=DCD	sp|P81605|DCD_HUMAN Dermcidin OS=Homo sapiens GN=DCD PE=1 SV=2;sp|P81605-2|DCD_HUMAN Isoform 2 of Dermcidin OS=Homo sapiens GN=DCD	1405400	3695300	640930	1109700	132050	276400	961940	754520	2	3	3	1	3	1	1	3	3	3	3	1	3	1	1	3	3	11.284	0	6.1653	By MS/MS	By MS/MS	By MS/MS	By MS/MS	By matching	By MS/MS	By MS/MS	By MS/MS	22.7	22.7	10	22.7	10	10	22.7	22.7	7027000	18477000	3204600	5548700
tr|Q53FI7|Q53FI7_HUMANFourandahalfLIMdomains1variant(Fragment)OS=HomosapiensPE=2SV=1;sp|Q13642-1|FHL1_HUMANIsoform1ofFourandahalfLIMdomainsprotein1OS=HomosapiensGN=FHL1;sp|Q13642-5|FHL1_HUMANIsoform5ofFourandahalfLIMdomainsprotein1OS=HomosapiensGN=FHL1;sp|Q13642-4|FHL1_HUMANIsoform4ofFourandahalfLIMdomainsprotein1OS=HomosapiensGN=FHL1;tr|Q5JXI8|Q5JXI8_HUMANFourandahalfLIMdomainsprotein1(Fragment)…	tr|Q53FI7|Q53FI7_HUMAN Four and a half LIM domains 1 variant (Fragment) OS=Homo sapiens PE=2 SV=1;sp|Q13642-1|FHL1_HUMAN Isoform 1 of Four and a half LIM domains protein 1 OS=Homo sapiens GN=FHL1;sp|Q13642-5|FHL1_HUMAN Isoform 5 of Four and a half LIM doma	1387900	3740000	2830500	3242800	715160	3844400	584480	203090	27	13	14	12	14	9	12	11	4	13	14	12	14	9	12	11	4	31.895	0	43.859	By MS/MS	By MS/MS	By MS/MS	By MS/MS	By MS/MS	By MS/MS	By MS/MS	By MS/MS	50.7	50.7	39.3	57.9	30	51.4	40	15	23594000	63579000	48118000	55128000
sp|Q15334|L2GL1_HUMANLethal(2)giantlarvaeproteinhomolog1OS=HomosapiensGN=LLGL1PE=1SV=3;tr|A0A087WW77|A0A087WW77_HUMANLethal(2)giantlarvaeproteinhomolog1OS=HomosapiensGN=LLGL1PE=1SV=1;tr|A0PJG1|A0PJG1_HUMANLLGL1protein(Fragment)OS=HomosapiensGN=LLGL1PE=2SV=1	sp|Q15334|L2GL1_HUMAN Lethal(2) giant larvae protein homolog 1 OS=Homo sapiens GN=LLGL1 PE=1 SV=3;tr|A0A087WW77|A0A087WW77_HUMAN Lethal(2) giant larvae protein homolog 1 OS=Homo sapiens GN=LLGL1 PE=1 SV=1	1374600	203980	743930	1088700	54103	559020	140910	142630	3	21	10	13	18	5	10	9	7	21	10	13	18	5	10	9	7	115.42	0	46.988	By MS/MS	By MS/MS	By MS/MS	By MS/MS	By MS/MS	By MS/MS	By MS/MS	By MS/MS	29.2	12.8	16.4	22.9	5	11.8	9.6	7.2	54984000	8159200	29757000	43549000
sp|P61026|RAB10_HUMANRas-relatedproteinRab-10OS=HomosapiensGN=RAB10PE=1SV=1;tr|Q53T70|Q53T70_HUMANUncharacterizedproteinRAB10(Fragment)OS=HomosapiensGN=RAB10PE=4SV=1;tr|Q53SX4|Q53SX4_HUMANUncharacterizedproteinRAB10(Fragment)OS=HomosapiensGN=RAB10PE=4SV=1;tr|A0A087WWB9|A0A087WWB9_HUMANRas-relatedproteinRab-13OS=HomosapiensGN=RAB13PE=1SV=1	sp|P61026|RAB10_HUMAN Ras-related protein Rab-10 OS=Homo sapiens GN=RAB10 PE=1 SV=1;tr|Q53T70|Q53T70_HUMAN Uncharacterized protein RAB10 (Fragment) OS=Homo sapiens GN=RAB10 PE=4 SV=1	1350500	4466300	3216500	3012700	1011000	3374500	628780	369590	4	7	8	9	8	6	7	4	4	5	6	7	6	4	5	2	2	22.541	0	37.893	By MS/MS	By MS/MS	By MS/MS	By MS/MS	By MS/MS	By MS/MS	By MS/MS	By MS/MS	35.5	34	39	36	25.5	32.5	18.5	18.5	17557000	58062000	41815000	39165000
|A0A059QD15_HUMANNADH-ubiquinoneoxidoreductasechain4OS=HomosapiensGN=ND4PE=3SV=1;tr|A0A059QAQ3|A0A059QAQ3_HUMANNADH-ubiquinoneoxidoreductasechain4OS=HomosapiensGN=ND4PE=3SV=1;tr|A0A023QWK0|A0A023QWK0_HUMANNADH-ubiquinoneoxidoreductasechain4OS=HomosapiensGN=ND4PE=3SV=1;tr|A0A023QVM5|A0A023QVM5_HUMANNADH-ubiquinoneoxidoreductasechain4OS=HomosapiensGN=ND4PE=3SV=1;tr|A0A023QUC2|A0A023QUC2_HUMANNADH-u…	465	1348500	227810	227310	87785	1392100	48663	0	0	3	3	2	2	1	3	2	0	1	3	2	2	1	3	2	0	12.5	303	7.1051	By matching	By MS/MS	By matching	By MS/MS	By MS/MS	By MS/MS	By MS/MS		3	12.5	6.3	6.3	3	12.5	6.3	0	30090000	12136000	2050300	2045800	790070
tr|A0A024RAM4|A0A024RAM4_HUMANMicrotubule-associatedprotein1B,isoformCRA_bOS=HomosapiensGN=MAP1BPE=4SV=1;sp|P46821|MAP1B_HUMANMicrotubule-associatedprotein1BOS=HomosapiensGN=MAP1BPE=1SV=2;tr|A2BDK6|A2BDK6_HUMANMicrotubule-associatedprotein1BOS=HomosapiensGN=MAP1BPE=2SV=1;tr|Q5H9P1|Q5H9P1_HUMANUncharacterizedproteinDKFZp686F1345(Fragment)OS=HomosapiensGN=DKFZp686F1345PE=2SV=1;tr|Q05BW8|Q05BW8_HUMA…	tr|A0A024RAM4|A0A024RAM4_HUMAN Microtubule-associated protein 1B, isoform CRA_b OS=Homo sapiens GN=MAP1B PE=4 SV=1;sp|P46821|MAP1B_HUMAN Microtubule-associated protein 1B OS=Homo sapiens GN=MAP1B PE=1 SV=2;tr|A2BDK6|A2BDK6_HUMAN Microtubule-associated prot	1342500	1272300	2351400	6612300	472250	2276100	746290	870350	15	57	42	49	63	29	46	45	30	55	42	48	61	28	45	44	28	270.62	0	323.31	By MS/MS	By MS/MS	By MS/MS	By MS/MS	By MS/MS	By MS/MS	By MS/MS	By MS/MS	38.8	28.2	30.1	40.8	17.4	30.8	29.6	18.5	135600000	128500000	237490000	667840000
tr|Q5U0K8|Q5U0K8_HUMANSodiumchannel,voltage-gated,typeII,betaOS=HomosapiensGN=SCN2BPE=2SV=1;sp|O60939|SCN2B_HUMANSodiumchannelsubunitbeta-2OS=HomosapiensGN=SCN2BPE=1SV=1	tr|Q5U0K8|Q5U0K8_HUMAN Sodium channel, voltage-gated, type II, beta OS=Homo sapiens GN=SCN2B PE=2 SV=1;sp|O60939|SCN2B_HUMAN Sodium channel subunit beta-2 OS=Homo sapiens GN=SCN2B PE=1 SV=1	1341800	3022200	3551800	3809300	561430	6287400	2182000	1281700	2	6	5	5	5	3	6	6	4	6	5	5	5	3	6	6	4	24.326	0	27.251	By MS/MS	By MS/MS	By MS/MS	By MS/MS	By matching	By MS/MS	By MS/MS	By MS/MS	43.3	37.2	37.2	34	24.2	43.3	43.3	27.9	14760000	33245000	39069000	41903000
tr|H0Y542|H0Y542_HUMANBreastcarcinoma-amplifiedsequence1(Fragment)OS=HomosapiensGN=BCAS1PE=1SV=1;sp|O75363-2|BCAS1_HUMANIsoform2ofBreastcarcinoma-amplifiedsequence1OS=HomosapiensGN=BCAS1;tr|B4DFL4|B4DFL4_HUMANcDNAFLJ50470,moderatelysimilartoRattusnorvegicusbreastcarcinomaamplifiedsequence1(Bcas1),mRNAOS=HomosapiensPE=2SV=1;tr|H7C1E7|H7C1E7_HUMANBreastcarcinoma-amplifiedsequence1(Fragment)OS=Homos…	tr|H0Y542|H0Y542_HUMAN Breast carcinoma-amplified sequence 1 (Fragment) OS=Homo sapiens GN=BCAS1 PE=1 SV=1;sp|O75363-2|BCAS1_HUMAN Isoform 2 of Breast carcinoma-amplified sequence 1 OS=Homo sapiens GN=BCAS1;tr|B4DFL4|B4DFL4_HUMAN cDNA FLJ50470, moderately	1335400	349970	2872400	1552300	438640	452600	416840	2184900	5	12	9	13	11	8	8	11	11	1	1	1	0	0	0	1	1	51.104	0	87.869	By MS/MS	By MS/MS	By MS/MS	By MS/MS	By MS/MS	By MS/MS	By MS/MS	By MS/MS	32.4	21.2	37.4	30	20.2	20.2	30.7	30.7	36055000	9449300	77554000	41911000
sp|Q8NHG7|SVIP_HUMANSmallVCP/p97-interactingproteinOS=HomosapiensGN=SVIPPE=1SV=1	sp|Q8NHG7|SVIP_HUMAN Small VCP/p97-interacting protein OS=Homo sapiens GN=SVIP PE=1 SV=1	1332900	4358900	2679700	1049100	1573000	1129500	277990	5151600	1	2	2	2	2	2	2	2	2	2	2	2	2	2	2	2	2	8.4426	0	7.0531	By MS/MS	By MS/MS	By MS/MS	By MS/MS	By MS/MS	By MS/MS	By matching	By MS/MS	32.5	32.5	32.5	32.5	32.5	32.5	32.5	32.5	5331500	17435000	10719000	4196400
tr|I3L1P8|I3L1P8_HUMANMitochondrial2-oxoglutarate/malatecarrierprotein(Fragment)OS=HomosapiensGN=SLC25A11PE=1SV=1;tr|Q6IBH0|Q6IBH0_HUMANSLC25A11proteinOS=HomosapiensGN=SLC25A11PE=2SV=1;sp|Q02978|M2OM_HUMANMitochondrial2-oxoglutarate/malatecarrierproteinOS=HomosapiensGN=SLC25A11PE=1SV=3;sp|Q02978-2|M2OM_HUMANIsoform2ofMitochondrial2-oxoglutarate/malatecarrierproteinOS=HomosapiensGN=SLC25A11	tr|I3L1P8|I3L1P8_HUMAN Mitochondrial 2-oxoglutarate/malate carrier protein (Fragment) OS=Homo sapiens GN=SLC25A11 PE=1 SV=1;tr|Q6IBH0|Q6IBH0_HUMAN SLC25A11 protein OS=Homo sapiens GN=SLC25A11 PE=2 SV=1;sp|Q02978|M2OM_HUMAN Mitochondrial 2-oxoglutarate/mala	1329100	8035000	7668200	5629500	2695700	12604000	809040	108150	4	12	11	10	12	9	12	9	2	12	11	10	12	9	12	9	2	32.182	0	51.451	By MS/MS	By MS/MS	By MS/MS	By MS/MS	By MS/MS	By MS/MS	By MS/MS	By MS/MS	47.3	44.3	43.2	47.3	35.1	47.3	35.1	8.1	22595000	136600000	130360000	95702000
sp|O15162-2|PLS1_HUMANIsoform2ofPhospholipidscramblase1OS=HomosapiensGN=PLSCR1;tr|C9J7K9|C9J7K9_HUMANPhospholipidscramblaseOS=HomosapiensGN=PLSCR1PE=1SV=1;sp|O15162|PLS1_HUMANPhospholipidscramblase1OS=HomosapiensGN=PLSCR1PE=1SV=1;tr|C9J9P4|C9J9P4_HUMANPhospholipidscramblase(Fragment)OS=HomosapiensGN=PLSCR1PE=1SV=1;tr|C9J0H3|C9J0H3_HUMANPhospholipidscramblase(Fragment)OS=HomosapiensGN=PLSCR1PE=1SV…	sp|O15162-2|PLS1_HUMAN Isoform 2 of Phospholipid scramblase 1 OS=Homo sapiens GN=PLSCR1;tr|C9J7K9|C9J7K9_HUMAN Phospholipid scramblase OS=Homo sapiens GN=PLSCR1 PE=1 SV=1;sp|O15162|PLS1_HUMAN Phospholipid scramblase 1 OS=Homo sapiens GN=PLSCR1 PE=1 SV=1;tr	1319200	723880	1245800	1521000	416750	1147700	1292300	2180500	7	6	4	4	6	4	4	5	4	6	4	4	6	4	4	5	4	26.825	0	26.272	By MS/MS	By MS/MS	By MS/MS	By MS/MS	By MS/MS	By MS/MS	By MS/MS	By MS/MS	24.1	16	13.1	24.1	13.1	20.3	20.3	13.1	14511000	7962700	13704000	16731000
sp|Q9BRF8|CPPED_HUMANSerine/threonine-proteinphosphataseCPPED1OS=HomosapiensGN=CPPED1PE=1SV=3;sp|Q9BRF8-2|CPPED_HUMANIsoform2ofSerine/threonine-proteinphosphataseCPPED1OS=HomosapiensGN=CPPED1;tr|B3KSL3|B3KSL3_HUMANcDNAFLJ36535fis,cloneTRACH2004521OS=HomosapiensPE=2SV=1;sp|Q9BRF8-3|CPPED_HUMANIsoform3ofSerine/threonine-proteinphosphataseCPPED1OS=HomosapiensGN=CPPED1	sp|Q9BRF8|CPPED_HUMAN Serine/threonine-protein phosphatase CPPED1 OS=Homo sapiens GN=CPPED1 PE=1 SV=3;sp|Q9BRF8-2|CPPED_HUMAN Isoform 2 of Serine/threonine-protein phosphatase CPPED1 OS=Homo sapiens GN=CPPED1;tr|B3KSL3|B3KSL3_HUMAN cDNA FLJ36535 fis, clone	1304400	288390	799360	530820	220850	400740	309920	1061100	4	7	2	4	5	3	4	3	4	7	2	4	5	3	4	3	4	35.548	0	36.483	By MS/MS	By MS/MS	By MS/MS	By MS/MS	By MS/MS	By MS/MS	By MS/MS	By MS/MS	32.5	7	20.4	21.7	15.6	20.4	9.9	14.6	22174000	4902700	13589000	9023900
tr|Q6ICQ8|Q6ICQ8_HUMANARHGprotein(Fragment)OS=HomosapiensGN=ARHGPE=2SV=1;sp|P84095|RHOG_HUMANRho-relatedGTP-bindingproteinRhoGOS=HomosapiensGN=RHOGPE=1SV=1	tr|Q6ICQ8|Q6ICQ8_HUMAN ARHG protein (Fragment) OS=Homo sapiens GN=ARHG PE=2 SV=1;sp|P84095|RHOG_HUMAN Rho-related GTP-binding protein RhoG OS=Homo sapiens GN=RHOG PE=1 SV=1	1300700	882190	3511800	1605200	470410	532190	60391	448520	2	9	5	8	9	4	5	2	3	8	4	7	8	3	4	1	2	21.308	0	37.14	By MS/MS	By MS/MS	By MS/MS	By MS/MS	By MS/MS	By MS/MS	By MS/MS	By MS/MS	58.1	27.7	49.2	58.1	22.5	32.5	15.7	15.7	14308000	9704100	38629000	17657000
sp|Q16563-2|SYPL1_HUMANIsoform2ofSynaptophysin-likeprotein1OS=HomosapiensGN=SYPL1;tr|C9JYN0|C9JYN0_HUMANSynaptophysin-likeprotein1OS=HomosapiensGN=SYPL1PE=1SV=1;tr|A8K865|A8K865_HUMANcDNAFLJ75789,highlysimilartoHomosapienssynaptophysin-like1(SYPL1),transcriptvariant1,mRNAOS=HomosapiensPE=2SV=1;tr|A4D0R1|A4D0R1_HUMANSynaptophysin-like1,isoformCRA_aOS=HomosapiensGN=SYPLPE=4SV=1;sp|Q16563|SYPL1_HUMA…	sp|Q16563-2|SYPL1_HUMAN Isoform 2 of Synaptophysin-like protein 1 OS=Homo sapiens GN=SYPL1;tr|C9JYN0|C9JYN0_HUMAN Synaptophysin-like protein 1 OS=Homo sapiens GN=SYPL1 PE=1 SV=1;tr|A8K865|A8K865_HUMAN cDNA FLJ75789, highly similar to Homo sapiens synaptoph	1296600	276930	746600	922970	62840	510800	154440	85485	7	4	2	1	3	1	1	2	1	4	2	1	3	1	1	2	1	26.411	0	6.4649	By MS/MS	By MS/MS	By MS/MS	By MS/MS	By MS/MS	By MS/MS	By MS/MS	By MS/MS	25.7	14.9	4.6	19.5	4.6	4.6	9.1	4.6	11669000	2492300	6719400	8306700
tr|A0A024R231|A0A024R231_HUMANGuaninedeaminase,isoformCRA_bOS=HomosapiensGN=GDAPE=4SV=1;sp|Q9Y2T3|GUAD_HUMANGuaninedeaminaseOS=HomosapiensGN=GDAPE=1SV=1;sp|Q9Y2T3-3|GUAD_HUMANIsoform3ofGuaninedeaminaseOS=HomosapiensGN=GDA;sp|Q9Y2T3-2|GUAD_HUMANIsoform2ofGuaninedeaminaseOS=HomosapiensGN=GDA;tr|Q5SZC6|Q5SZC6_HUMANGuaninedeaminaseOS=HomosapiensGN=GDAPE=1SV=1;tr|B3KUM3|B3KUM3_HUMANcDNAFLJ40221fis,clo…	tr|A0A024R231|A0A024R231_HUMAN Guanine deaminase, isoform CRA_b OS=Homo sapiens GN=GDA PE=4 SV=1;sp|Q9Y2T3|GUAD_HUMAN Guanine deaminase OS=Homo sapiens GN=GDA PE=1 SV=1;sp|Q9Y2T3-3|GUAD_HUMAN Isoform 3 of Guanine deaminase OS=Homo sapiens GN=GDA;sp|Q9Y2T3-	1276600	1835700	1614000	3519400	264920	3191900	1585900	2372500	10	15	12	10	16	6	14	12	12	15	12	10	16	6	14	12	12	51.002	0	63.646	By MS/MS	By MS/MS	By MS/MS	By MS/MS	By MS/MS	By MS/MS	By MS/MS	By MS/MS	48.2	32.4	28.4	50.4	16.5	46.3	37	38.1	33193000	47729000	41963000	91505000
tr|D3DNG6|D3DNG6_HUMANPhospholipidscramblaseOS=HomosapiensGN=PLSCR4PE=3SV=1;tr|B2R720|B2R720_HUMANPhospholipidscramblaseOS=HomosapiensPE=2SV=1;tr|A8K9V0|A8K9V0_HUMANPhospholipidscramblaseOS=HomosapiensPE=2SV=1;sp|Q9NRQ2|PLS4_HUMANPhospholipidscramblase4OS=HomosapiensGN=PLSCR4PE=1SV=2;sp|Q9NRQ2-2|PLS4_HUMANIsoform2ofPhospholipidscramblase4OS=HomosapiensGN=PLSCR4;tr|E9PHR9|E9PHR9_HUMANPhospholipids…	tr|D3DNG6|D3DNG6_HUMAN Phospholipid scramblase OS=Homo sapiens GN=PLSCR4 PE=3 SV=1;tr|B2R720|B2R720_HUMAN Phospholipid scramblase OS=Homo sapiens PE=2 SV=1;tr|A8K9V0|A8K9V0_HUMAN Phospholipid scramblase OS=Homo sapiens PE=2 SV=1;sp|Q9NRQ2|PLS4_HUMAN Phosph	1265900	1230100	621420	1441200	39488	1177900	229240	159040	8	6	5	3	5	1	3	3	3	6	5	3	5	1	3	3	3	35.553	0	28.568	By MS/MS	By MS/MS	By MS/MS	By MS/MS	By MS/MS	By MS/MS	By MS/MS	By matching	22	14.3	9.9	18.2	5.4	10.2	10.2	10.2	12659000	12301000	6214200	14412000
tr|B4DIG3|B4DIG3_HUMANcDNAFLJ53885,highlysimilartoEndothelinBreceptor-likeprotein2OS=HomosapiensPE=2SV=1;sp|O60883|ETBR2_HUMANProsaposinreceptorGPR37L1OS=HomosapiensGN=GPR37L1PE=1SV=2	tr|B4DIG3|B4DIG3_HUMAN cDNA FLJ53885, highly similar to Endothelin B receptor-like protein 2 OS=Homo sapiens PE=2 SV=1;sp|O60883|ETBR2_HUMAN Prosaposin receptor GPR37L1 OS=Homo sapiens GN=GPR37L1 PE=1 SV=2	1254200	6791500	5729000	4178800	1915300	11623000	1416600	479030	2	5	5	5	5	4	5	5	4	5	5	5	5	4	5	5	4	38.384	0	8.1152	By MS/MS	By MS/MS	By MS/MS	By MS/MS	By MS/MS	By MS/MS	By MS/MS	By MS/MS	16.1	16.1	16.1	16.1	12.4	16.1	16.1	12.4	13796000	74707000	63019000	45967000
tr|A0A0J9YYF7|A0A0J9YYF7_HUMANDisheveled-associatedactivatorofmorphogenesis2OS=HomosapiensGN=DAAM2PE=1SV=1;sp|Q86T65|DAAM2_HUMANDisheveled-associatedactivatorofmorphogenesis2OS=HomosapiensGN=DAAM2PE=1SV=3;sp|Q86T65-4|DAAM2_HUMANIsoform2ofDisheveled-associatedactivatorofmorphogenesis2OS=HomosapiensGN=DAAM2;tr|A0A0J9YX09|A0A0J9YX09_HUMANDisheveled-associatedactivatorofmorphogenesis2OS=HomosapiensGN…	tr|A0A0J9YYF7|A0A0J9YYF7_HUMAN Disheveled-associated activator of morphogenesis 2 OS=Homo sapiens GN=DAAM2 PE=1 SV=1;sp|Q86T65|DAAM2_HUMAN Disheveled-associated activator of morphogenesis 2 OS=Homo sapiens GN=DAAM2 PE=1 SV=3;sp|Q86T65-4|DAAM2_HUMAN Isoform	1250400	43692	59169	781920	0	31450	42079	509710	6	28	5	4	22	0	3	9	13	25	4	4	20	0	3	8	13	124.51	0	77.888	By MS/MS	By matching	By MS/MS	By MS/MS		By MS/MS	By MS/MS	By MS/MS	32.8	5.1	4.3	26.3	0	2.4	8.4	14.2	73776000	2577800	3491000	46133000
tr|A0A024R1K7|A0A024R1K7_HUMANTyrosine3-monooxygenase/tryptophan5-monooxygenaseactivationprotein,etapolypeptide,isoformCRA_bOS=HomosapiensGN=YWHAHPE=3SV=1;sp|Q04917|1433F_HUMAN14-3-3proteinetaOS=HomosapiensGN=YWHAHPE=1SV=4;tr|A2IDB2|A2IDB2_HUMAN14-3-3proteineta(Fragment)OS=HomosapiensGN=YWHAHPE=1SV=1;tr|Q9H4N8|Q9H4N8_HUMANHomosapienscloneCDABP0046mRNAsequenceOS=HomosapiensPE=2SV=1;tr|B2R6N6|B2R6N…	tr|A0A024R1K7|A0A024R1K7_HUMAN Tyrosine 3-monooxygenase/tryptophan 5-monooxygenase activation protein, eta polypeptide, isoform CRA_b OS=Homo sapiens GN=YWHAH PE=3 SV=1;sp|Q04917|1433F_HUMAN 14-3-3 protein eta OS=Homo sapiens GN=YWHAH PE=1 SV=4;tr|A2IDB2|A	1239200	2957600	2619100	2561600	879780	3941600	2207300	2190400	7	8	7	7	8	4	11	10	6	6	5	5	6	3	9	8	5	28.218	0	39.719	By MS/MS	By MS/MS	By MS/MS	By MS/MS	By MS/MS	By MS/MS	By MS/MS	By MS/MS	35.4	21.5	21.5	35.4	11.8	40.2	36.2	25.6	19826000	47321000	41905000	40985000
sp|Q96CW1|AP2M1_HUMANAP-2complexsubunitmuOS=HomosapiensGN=AP2M1PE=1SV=2;sp|Q96CW1-2|AP2M1_HUMANIsoform2ofAP-2complexsubunitmuOS=HomosapiensGN=AP2M1;tr|A0A087WY71|A0A087WY71_HUMANAP-2complexsubunitmuOS=HomosapiensGN=AP2M1PE=1SV=1;tr|E9PFW3|E9PFW3_HUMANAP-2complexsubunitmuOS=HomosapiensGN=AP2M1PE=1SV=1;tr|B4DNB9|B4DNB9_HUMANcDNAFLJ53069,highlysimilartoAP-2complexsubunitmu-1OS=HomosapiensPE=2SV=1;tr…	sp|Q96CW1|AP2M1_HUMAN AP-2 complex subunit mu OS=Homo sapiens GN=AP2M1 PE=1 SV=2;sp|Q96CW1-2|AP2M1_HUMAN Isoform 2 of AP-2 complex subunit mu OS=Homo sapiens GN=AP2M1;tr|A0A087WY71|A0A087WY71_HUMAN AP-2 complex subunit mu OS=Homo sapiens GN=AP2M1 PE=1 SV=1	1236100	9896800	5946100	4650000	1791800	8243500	512770	72722	16	20	24	23	20	15	21	12	4	20	24	23	20	15	21	12	4	49.654	0	101.83	By MS/MS	By MS/MS	By MS/MS	By MS/MS	By MS/MS	By MS/MS	By MS/MS	By MS/MS	48.7	55.9	52	47.8	36.3	50.8	31	7.6	32139000	257320000	154600000	120900000
tr|A0A024R845|A0A024R845_HUMANRAB14,memberRASoncogenefamily,isoformCRA_aOS=HomosapiensGN=RAB14PE=4SV=1;sp|P61106|RAB14_HUMANRas-relatedproteinRab-14OS=HomosapiensGN=RAB14PE=1SV=4;tr|X6RFL8|X6RFL8_HUMANRas-relatedproteinRab-14(Fragment)OS=HomosapiensGN=RAB14PE=1SV=1	tr|A0A024R845|A0A024R845_HUMAN RAB14, member RAS oncogene family, isoform CRA_a OS=Homo sapiens GN=RAB14 PE=4 SV=1;sp|P61106|RAB14_HUMAN Ras-related protein Rab-14 OS=Homo sapiens GN=RAB14 PE=1 SV=4;tr|X6RFL8|X6RFL8_HUMAN Ras-related protein Rab-14 (Fragme	1222500	2716700	2739400	3394300	484990	3068100	270390	0	3	8	11	8	10	5	7	5	0	8	11	8	10	5	7	5	0	23.897	0	50.767	By MS/MS	By MS/MS	By MS/MS	By MS/MS	By MS/MS	By MS/MS	By MS/MS		45.6	61.4	48.8	57.2	39.1	41.4	27.9	0	19561000	43467000	43831000	54308000
tr|A0A1W2PS43|A0A1W2PS43_HUMANLysosomemembraneprotein2OS=HomosapiensGN=SCARB2PE=1SV=1;tr|A0A024RDG6|A0A024RDG6_HUMANScavengerreceptorclassB,member2,isoformCRA_aOS=HomosapiensGN=SCARB2PE=3SV=1;sp|Q14108|SCRB2_HUMANLysosomemembraneprotein2OS=HomosapiensGN=SCARB2PE=1SV=2;tr|A0A1W2PRS1|A0A1W2PRS1_HUMANLysosomemembraneprotein2(Fragment)OS=HomosapiensGN=SCARB2PE=1SV=1;tr|A0A1W2PPX5|A0A1W2PPX5_HUMANLyso…	tr|A0A1W2PS43|A0A1W2PS43_HUMAN Lysosome membrane protein 2 OS=Homo sapiens GN=SCARB2 PE=1 SV=1;tr|A0A024RDG6|A0A024RDG6_HUMAN Scavenger receptor class B, member 2, isoform CRA_a OS=Homo sapiens GN=SCARB2 PE=3 SV=1;sp|Q14108|SCRB2_HUMAN Lysosome membrane pr	1215700	1530700	1272300	2029500	394050	2006900	1006400	1476300	15	8	7	7	9	5	8	7	7	8	7	7	9	5	8	7	7	53.891	0	16.999	By MS/MS	By MS/MS	By MS/MS	By MS/MS	By MS/MS	By MS/MS	By MS/MS	By MS/MS	17.5	13.7	13.7	23.8	9.9	22.3	17.7	17.7	29177000	36737000	30536000	48708000
sp|Q05193-2|DYN1_HUMANIsoform2ofDynamin-1OS=HomosapiensGN=DNM1;tr|A0A0D9SFB1|A0A0D9SFB1_HUMANDynamin-1OS=HomosapiensGN=DNM1PE=1SV=1;tr|B7ZAC0|B7ZAC0_HUMANcDNA,FLJ79134,highlysimilartoDynamin-1(EC3.6.5.5)OS=HomosapiensPE=2SV=1;sp|Q05193-5|DYN1_HUMANIsoform4ofDynamin-1OS=HomosapiensGN=DNM1;tr|B4DK06|B4DK06_HUMANcDNAFLJ60610,highlysimilartoDynamin-1(EC3.6.5.5)OS=HomosapiensPE=2SV=1;tr|H7C5U0|H7C5U0_…	sp|Q05193-2|DYN1_HUMAN Isoform 2 of Dynamin-1 OS=Homo sapiens GN=DNM1;tr|A0A0D9SFB1|A0A0D9SFB1_HUMAN Dynamin-1 OS=Homo sapiens GN=DNM1 PE=1 SV=1;tr|B7ZAC0|B7ZAC0_HUMAN cDNA, FLJ79134, highly similar to Dynamin-1 (EC 3.6.5.5) OS=Homo sapiens PE=2 SV=1;sp|Q0	1209200	3820200	2802700	4236000	1109400	4381000	712850	263550	6	29	27	24	32	18	32	27	12	1	1	1	1	1	2	2	1	97.262	0	236.39	By MS/MS	By MS/MS	By MS/MS	By MS/MS	By MS/MS	By MS/MS	By MS/MS	By MS/MS	35.5	38	36	39.8	26.5	45.8	37.6	17.5	56830000	179550000	131730000	199090000
tr|A0A024R830|A0A024R830_HUMANInositol-1-monophosphataseOS=HomosapiensGN=IMPA1PE=3SV=1;sp|P29218|IMPA1_HUMANInositolmonophosphatase1OS=HomosapiensGN=IMPA1PE=1SV=1;tr|A0A140VJL8|A0A140VJL8_HUMANInositol-1-monophosphataseOS=HomosapiensPE=2SV=1;sp|P29218-3|IMPA1_HUMANIsoform3ofInositolmonophosphatase1OS=HomosapiensGN=IMPA1;tr|H0YBL1|H0YBL1_HUMANInositol-1-monophosphatase(Fragment)OS=HomosapiensGN=IM…	tr|A0A024R830|A0A024R830_HUMAN Inositol-1-monophosphatase OS=Homo sapiens GN=IMPA1 PE=3 SV=1;sp|P29218|IMPA1_HUMAN Inositol monophosphatase 1 OS=Homo sapiens GN=IMPA1 PE=1 SV=1;tr|A0A140VJL8|A0A140VJL8_HUMAN Inositol-1-monophosphatase OS=Homo sapiens PE=2	1194800	1252700	1705000	2002300	359430	1413000	1195200	1223800	13	9	8	9	10	5	8	9	9	9	8	9	10	5	8	9	9	30.188	0	37.47	By MS/MS	By MS/MS	By MS/MS	By MS/MS	By MS/MS	By MS/MS	By MS/MS	By MS/MS	38.6	24.9	28.9	40.1	14.4	33.2	37.2	37.2	19116000	20043000	27280000	32037000
tr|D6RGI3|D6RGI3_HUMANSeptin11,isoformCRA_bOS=HomosapiensGN=SEPT11PE=1SV=1;sp|Q9NVA2|SEP11_HUMANSeptin-11OS=HomosapiensGN=SEPT11PE=1SV=3;tr|D6RER5|D6RER5_HUMANSeptin-11OS=HomosapiensGN=SEPT11PE=1SV=1;sp|Q9NVA2-2|SEP11_HUMANIsoform2ofSeptin-11OS=HomosapiensGN=SEPT11;tr|D6RDU5|D6RDU5_HUMANSeptin-11(Fragment)OS=HomosapiensGN=SEPT11PE=1SV=1;tr|Q96KC0|Q96KC0_HUMANcDNAFLJ14373fis,cloneHEMBA1001595,high…	tr|D6RGI3|D6RGI3_HUMAN Septin 11, isoform CRA_b OS=Homo sapiens GN=SEPT11 PE=1 SV=1;sp|Q9NVA2|SEP11_HUMAN Septin-11 OS=Homo sapiens GN=SEPT11 PE=1 SV=3;tr|D6RER5|D6RER5_HUMAN Septin-11 OS=Homo sapiens GN=SEPT11 PE=1 SV=1;sp|Q9NVA2-2|SEP11_HUMAN Isoform 2 o	1189600	6405300	4468500	4516300	1894900	9535800	1587200	1208600	10	18	17	15	17	13	20	16	13	12	10	9	11	8	11	9	7	49.005	0	85.812	By MS/MS	By MS/MS	By MS/MS	By MS/MS	By MS/MS	By MS/MS	By MS/MS	By MS/MS	50.6	42.1	41.4	48.2	37.9	53.6	47.1	36.7	24982000	134510000	93838000	94843000
tr|E9PF17|E9PF17_HUMANVersicancoreproteinOS=HomosapiensGN=VCANPE=1SV=2;tr|A0A024RAP3|A0A024RAP3_HUMANChondroitinsulfateproteoglycan2(Versican),isoformCRA_aOS=HomosapiensGN=CSPG2PE=4SV=1;sp|P13611-3|CSPG2_HUMANIsoformV2ofVersicancoreproteinOS=HomosapiensGN=VCAN;tr|A0A024RAQ9|A0A024RAQ9_HUMANChondroitinsulfateproteoglycan2(Versican),isoformCRA_bOS=HomosapiensGN=CSPG2PE=4SV=1;sp|P13611|CSPG2_HUMANVe…	tr|E9PF17|E9PF17_HUMAN Versican core protein OS=Homo sapiens GN=VCAN PE=1 SV=2;tr|A0A024RAP3|A0A024RAP3_HUMAN Chondroitin sulfate proteoglycan 2 (Versican), isoform CRA_a OS=Homo sapiens GN=CSPG2 PE=4 SV=1;sp|P13611-3|CSPG2_HUMAN Isoform V2 of Versican cor	1181400	91507	945210	1105700	163010	482240	286780	333240	15	14	9	11	14	11	10	12	12	14	9	11	14	11	10	12	12	176.83	0	87.109	By MS/MS	By MS/MS	By MS/MS	By MS/MS	By MS/MS	By MS/MS	By MS/MS	By MS/MS	11.5	6.4	8.2	11.5	8	9.7	10.2	9.5	92148000	7137500	73727000	86242000
tr|A0A140VK65|A0A140VK65_HUMANTesticularsecretoryproteinLi65OS=HomosapiensPE=2SV=1;sp|P21281|VATB2_HUMANV-typeprotonATPasesubunitB,brainisoformOS=HomosapiensGN=ATP6V1B2PE=1SV=3;tr|Q59HF3|Q59HF3_HUMANATPase,H+transporting,lysosomal56/58kD,V1subunitB,isoform2variant(Fragment)OS=HomosapiensPE=2SV=1;tr|H0YC04|H0YC04_HUMANV-typeprotonATPasesubunitB,brainisoform(Fragment)OS=HomosapiensGN=ATP6V1B2PE=1SV…	tr|A0A140VK65|A0A140VK65_HUMAN Testicular secretory protein Li 65 OS=Homo sapiens PE=2 SV=1;sp|P21281|VATB2_HUMAN V-type proton ATPase subunit B, brain isoform OS=Homo sapiens GN=ATP6V1B2 PE=1 SV=3;tr|Q59HF3|Q59HF3_HUMAN ATPase, H+ transporting, lysosomal	1181300	1675700	2703700	3743700	394990	6598100	1267100	768270	14	17	15	15	16	10	16	15	12	17	15	15	16	10	16	15	12	56.5	0	47.414	By MS/MS	By MS/MS	By MS/MS	By MS/MS	By MS/MS	By MS/MS	By MS/MS	By MS/MS	41.1	36.2	36.2	39.7	24.5	36.8	36.8	27.2	29532000	41892000	67593000	93592000
sp|O15400-2|STX7_HUMANIsoform2ofSyntaxin-7OS=HomosapiensGN=STX7;sp|O15400|STX7_HUMANSyntaxin-7OS=HomosapiensGN=STX7PE=1SV=4;tr|B4DH37|B4DH37_HUMANcDNAFLJ53760,highlysimilartoSyntaxin-7OS=HomosapiensPE=2SV=1;tr|B4DWC2|B4DWC2_HUMANcDNAFLJ50258,weaklysimilartoSyntaxin-7OS=HomosapiensPE=2SV=1	sp|O15400-2|STX7_HUMAN Isoform 2 of Syntaxin-7 OS=Homo sapiens GN=STX7;sp|O15400|STX7_HUMAN Syntaxin-7 OS=Homo sapiens GN=STX7 PE=1 SV=4;tr|B4DH37|B4DH37_HUMAN cDNA FLJ53760, highly similar to Syntaxin-7 OS=Homo sapiens PE=2 SV=1	1179200	4453100	3933600	3670600	942860	24844000	7597100	2630700	4	6	8	6	7	6	9	9	7	6	8	6	7	6	9	9	7	27.4	0	29.477	By MS/MS	By MS/MS	By MS/MS	By MS/MS	By MS/MS	By MS/MS	By MS/MS	By MS/MS	36.4	43.1	31.4	37.2	31.4	48.5	48.5	42.3	11792000	44531000	39336000	36706000
sp|Q01814-4|AT2B2_HUMANIsoformZAofPlasmamembranecalcium-transportingATPase2OS=HomosapiensGN=ATP2B2;sp|Q01814-7|AT2B2_HUMANIsoformXAofPlasmamembranecalcium-transportingATPase2OS=HomosapiensGN=ATP2B2;sp|Q01814-3|AT2B2_HUMANIsoformYAofPlasmamembranecalcium-transportingATPase2OS=HomosapiensGN=ATP2B2;sp|Q01814-2|AT2B2_HUMANIsoformWAofPlasmamembranecalcium-transportingATPase2OS=HomosapiensGN=ATP2B2;tr|…	sp|Q01814-4|AT2B2_HUMAN Isoform ZA of Plasma membrane calcium-transporting ATPase 2 OS=Homo sapiens GN=ATP2B2;sp|Q01814-7|AT2B2_HUMAN Isoform XA of Plasma membrane calcium-transporting ATPase 2 OS=Homo sapiens GN=ATP2B2;sp|Q01814-3|AT2B2_HUMAN Isoform YA o	1177700	6016000	5978100	7055200	1657100	9361000	1514400	487790	5	26	34	32	32	26	35	27	14	2	3	3	2	3	4	1	0	127.33	0	300.54	By MS/MS	By MS/MS	By MS/MS	By MS/MS	By MS/MS	By MS/MS	By MS/MS	By MS/MS	27.5	32.7	30	33.7	26.3	34.3	24.6	12.6	61242000	312830000	310860000	366870000
tr|A0A0S2Z3H8|A0A0S2Z3H8_HUMANGNAScomplexlocusisoform1(Fragment)OS=HomosapiensGN=GNASPE=2SV=1;sp|P63092|GNAS2_HUMANGuaninenucleotide-bindingproteinG(s)subunitalphaisoformsshortOS=HomosapiensGN=GNASPE=1SV=1;sp|P63092-4|GNAS2_HUMANIsoform4ofGuaninenucleotide-bindingproteinG(s)subunitalphaisoformsshortOS=HomosapiensGN=GNAS;sp|Q5JWF2|GNAS1_HUMANGuaninenucleotide-bindingproteinG(s)subunitalphaisoforms…	tr|A0A0S2Z3H8|A0A0S2Z3H8_HUMAN GNAS complex locus isoform 1 (Fragment) OS=Homo sapiens GN=GNAS PE=2 SV=1;sp|P63092|GNAS2_HUMAN Guanine nucleotide-binding protein G(s) subunit alpha isoforms short OS=Homo sapiens GN=GNAS PE=1 SV=1;sp|P63092-4|GNAS2_HUMAN Is	1168000	2480300	812730	1226300	229950	741830	448820	2865100	26	10	8	8	10	6	6	7	8	8	7	7	8	5	5	6	7	45.664	0	20.516	By MS/MS	By MS/MS	By MS/MS	By MS/MS	By MS/MS	By MS/MS	By MS/MS	By MS/MS	31.5	24.9	24.9	31.5	17.3	17.3	22.3	24.9	23361000	49607000	16255000	24527000
tr|B2R7T8|B2R7T8_HUMANcDNA,FLJ93598,highlysimilartoHomosapienscappingprotein(actinfilament)muscleZ-line,beta(CAPZB),mRNAOS=HomosapiensPE=2SV=1;sp|P47756-2|CAPZB_HUMANIsoform2ofF-actin-cappingproteinsubunitbetaOS=HomosapiensGN=CAPZB;tr|B1AK87|B1AK87_HUMANCappingprotein(Actinfilament)muscleZ-line,beta,isoformCRA_aOS=HomosapiensGN=CAPZBPE=1SV=1;tr|B1AK88|B1AK88_HUMANCappingprotein(Actinfilament)musc…	tr|B2R7T8|B2R7T8_HUMAN cDNA, FLJ93598, highly similar to Homo sapiens capping protein (actin filament) muscle Z-line, beta (CAPZB), mRNA OS=Homo sapiens PE=2 SV=1;sp|P47756-2|CAPZB_HUMAN Isoform 2 of F-actin-capping protein subunit beta OS=Homo sapiens GN=	1158000	1673800	1931200	2094400	510370	2435800	1141300	897840	6	13	12	12	13	8	14	13	10	3	2	2	3	0	2	3	1	30.656	0	42.013	By MS/MS	By MS/MS	By MS/MS	By MS/MS	By MS/MS	By MS/MS	By MS/MS	By MS/MS	46	48.2	47.8	48.5	34.9	53.7	46.3	40.8	18529000	26781000	30900000	33510000
sp|P02689|MYP2_HUMANMyelinP2proteinOS=HomosapiensGN=PMP2PE=1SV=3;tr|E5RH45|E5RH45_HUMANMyelinP2proteinOS=HomosapiensGN=PMP2PE=1SV=1;tr|E5RIR0|E5RIR0_HUMANFattyacid-bindingprotein,adipocyteOS=HomosapiensGN=FABP4PE=1SV=1;tr|E7DVW4|E7DVW4_HUMANEpididymissecretoryproteinLi104OS=HomosapiensGN=FABP4PE=2SV=1;sp|P15090|FABP4_HUMANFattyacid-bindingprotein,adipocyteOS=HomosapiensGN=FABP4PE=1SV=3	sp|P02689|MYP2_HUMAN Myelin P2 protein OS=Homo sapiens GN=PMP2 PE=1 SV=3	1151000	233720	3097100	794770	938240	61487	0	133450	5	8	2	6	5	5	1	0	1	8	2	6	5	5	1	0	1	14.909	0	9.2181	By MS/MS	By matching	By MS/MS	By MS/MS	By MS/MS	By matching		By MS/MS	55.3	12.9	47	28.8	40.9	5.3	0	9.8	9208100	1869800	24777000	6358100
sp|Q9H313|TTYH1_HUMANProteintweetyhomolog1OS=HomosapiensGN=TTYH1PE=2SV=1;sp|Q9H313-2|TTYH1_HUMANIsoform2ofProteintweetyhomolog1OS=HomosapiensGN=TTYH1;sp|Q9H313-4|TTYH1_HUMANIsoform4ofProteintweetyhomolog1OS=HomosapiensGN=TTYH1;sp|Q9H313-5|TTYH1_HUMANIsoform5ofProteintweetyhomolog1OS=HomosapiensGN=TTYH1;tr|A0A0G2JPK6|A0A0G2JPK6_HUMANProteintweetyhomologOS=HomosapiensGN=TTYH1PE=1SV=1;tr|E7ET67|E7ET…	sp|Q9H313|TTYH1_HUMAN Protein tweety homolog 1 OS=Homo sapiens GN=TTYH1 PE=2 SV=1;sp|Q9H313-2|TTYH1_HUMAN Isoform 2 of Protein tweety homolog 1 OS=Homo sapiens GN=TTYH1;sp|Q9H313-4|TTYH1_HUMAN Isoform 4 of Protein tweety homolog 1 OS=Homo sapiens GN=TTYH1;	1150900	5326800	360340	1812800	427150	2412700	700230	2745800	7	4	6	2	4	3	4	4	6	0	1	0	0	0	0	1	1	49.05	0	25.158	By MS/MS	By MS/MS	By MS/MS	By MS/MS	By MS/MS	By MS/MS	By MS/MS	By MS/MS	10.2	14	4.9	10.2	6.7	9.8	9.8	14	14961000	69248000	4684400	23566000
tr|A0A024R0A8|A0A024R0A8_HUMANAdenosylhomocysteinaseOS=HomosapiensGN=AHCYL1PE=3SV=1;sp|O43865|SAHH2_HUMANS-adenosylhomocysteinehydrolase-likeprotein1OS=HomosapiensGN=AHCYL1PE=1SV=2;sp|O43865-2|SAHH2_HUMANIsoform2ofS-adenosylhomocysteinehydrolase-likeprotein1OS=HomosapiensGN=AHCYL1;tr|Q2NKW8|Q2NKW8_HUMANAdenosylhomocysteinase(Fragment)OS=HomosapiensGN=AHCYL1PE=2SV=1;tr|V5YQL4|V5YQL4_HUMANAdenosylh…	tr|A0A024R0A8|A0A024R0A8_HUMAN Adenosylhomocysteinase OS=Homo sapiens GN=AHCYL1 PE=3 SV=1;sp|O43865|SAHH2_HUMAN S-adenosylhomocysteine hydrolase-like protein 1 OS=Homo sapiens GN=AHCYL1 PE=1 SV=2;sp|O43865-2|SAHH2_HUMAN Isoform 2 of S-adenosylhomocysteine	1146500	3393200	2889800	2802700	1302200	6516000	606840	303860	9	18	16	17	17	13	16	13	6	8	6	6	7	4	6	3	2	58.951	0	76.16	By MS/MS	By MS/MS	By MS/MS	By MS/MS	By MS/MS	By MS/MS	By MS/MS	By MS/MS	37.9	30	31.5	34.9	23.4	34.5	26	11.9	29810000	88224000	75134000	72871000
tr|Q6LET3|Q6LET3_HUMANHPRT1protein(Fragment)OS=HomosapiensGN=HPRT1PE=2SV=1;tr|A0A140VJL3|A0A140VJL3_HUMANTesticulartissueproteinLi89OS=HomosapiensPE=2SV=1;sp|P00492|HPRT_HUMANHypoxanthine-guaninephosphoribosyltransferaseOS=HomosapiensGN=HPRT1PE=1SV=2;tr|A0A0H3YEQ7|A0A0H3YEQ7_HUMANHypoxanthine-guaninephosphoribosyltransferase1(Fragment)OS=HomosapiensGN=HPRT1PE=2SV=1;sp|Q9NRG1-2|PRDC1_HUMANIsoform2…	tr|Q6LET3|Q6LET3_HUMAN HPRT1 protein (Fragment) OS=Homo sapiens GN=HPRT1 PE=2 SV=1;tr|A0A140VJL3|A0A140VJL3_HUMAN Testicular tissue protein Li 89 OS=Homo sapiens PE=2 SV=1;sp|P00492|HPRT_HUMAN Hypoxanthine-guanine phosphoribosyltransferase OS=Homo sapiens	1141200	757230	3178900	1280700	658360	6809900	7077700	3042200	6	9	7	8	8	7	11	11	8	9	7	8	8	7	11	11	8	24.588	0	77.244	By MS/MS	By MS/MS	By MS/MS	By MS/MS	By MS/MS	By MS/MS	By MS/MS	By MS/MS	57.3	41.3	45.9	50	41.3	62.8	62.8	37.2	14836000	9844000	41326000	16649000
tr|B4DSL6|B4DSL6_HUMANcDNAFLJ57190,highlysimilartoActin-bindingproteinanillinOS=HomosapiensPE=2SV=1;tr|A0A024RA49|A0A024RA49_HUMANAnillin,actinbindingprotein(Scrapshomolog,Drosophila),isoformCRA_eOS=HomosapiensGN=ANLNPE=4SV=1;sp|Q9NQW6|ANLN_HUMANAnillinOS=HomosapiensGN=ANLNPE=1SV=2;tr|A8K5D9|A8K5D9_HUMANcDNAFLJ77424,highlysimilartoHomosapiensanillin,actinbindingprotein(scrapshomolog,Drosophila),m…	tr|B4DSL6|B4DSL6_HUMAN cDNA FLJ57190, highly similar to Actin-binding protein anillin OS=Homo sapiens PE=2 SV=1;tr|A0A024RA49|A0A024RA49_HUMAN Anillin, actin binding protein (Scraps homolog, Drosophila), isoform CRA_e OS=Homo sapiens GN=ANLN PE=4 SV=1;sp|Q	1139300	106280	654170	664190	123700	146830	103030	140410	8	21	6	10	19	6	5	6	5	21	6	10	19	6	5	6	5	110.85	0	34.07	By MS/MS	By MS/MS	By MS/MS	By MS/MS	By MS/MS	By MS/MS	By MS/MS	By MS/MS	24.6	5.4	9.6	21.4	5.7	4.5	5.5	4.6	61525000	5739300	35325000	35866000
tr|B4DNY3|B4DNY3_HUMANAdenylylcyclase-associatedproteinOS=HomosapiensPE=2SV=1;tr|B4DNW7|B4DNW7_HUMANAdenylylcyclase-associatedproteinOS=HomosapiensPE=2SV=1;tr|B4DI38|B4DI38_HUMANAdenylylcyclase-associatedproteinOS=HomosapiensPE=2SV=1;tr|D3DPU2|D3DPU2_HUMANAdenylylcyclase-associatedproteinOS=HomosapiensGN=CAP1PE=2SV=1;tr|B2RDY9|B2RDY9_HUMANAdenylylcyclase-associatedproteinOS=HomosapiensPE=2SV=1;tr…	tr|B4DNY3|B4DNY3_HUMAN Adenylyl cyclase-associated protein OS=Homo sapiens PE=2 SV=1;tr|B4DNW7|B4DNW7_HUMAN Adenylyl cyclase-associated protein OS=Homo sapiens PE=2 SV=1;tr|B4DI38|B4DI38_HUMAN Adenylyl cyclase-associated protein OS=Homo sapiens PE=2 SV=1;t	1139100	943080	1599100	2009000	343310	2018600	515460	599000	17	12	11	9	12	5	10	9	10	11	10	8	11	4	9	8	9	43.706	0	74.296	By MS/MS	By MS/MS	By MS/MS	By MS/MS	By MS/MS	By MS/MS	By MS/MS	By MS/MS	37.4	40.4	27.4	36.9	13.7	34.2	34.2	28.9	26199000	21691000	36778000	46208000
tr|A0A140VJJ6|A0A140VJJ6_HUMANTesticulartissueproteinLi70OS=HomosapiensPE=2SV=1;sp|P02679-2|FIBG_HUMANIsoformGamma-AofFibrinogengammachainOS=HomosapiensGN=FGG;tr|C9JEU5|C9JEU5_HUMANFibrinogengammachainOS=HomosapiensGN=FGGPE=1SV=1;sp|P02679|FIBG_HUMANFibrinogengammachainOS=HomosapiensGN=FGGPE=1SV=3;tr|C9JC84|C9JC84_HUMANFibrinogengammachainOS=HomosapiensGN=FGGPE=1SV=1;tr|D3DP16|D3DP16_HUMANFibrino…	tr|A0A140VJJ6|A0A140VJJ6_HUMAN Testicular tissue protein Li 70 OS=Homo sapiens PE=2 SV=1;sp|P02679-2|FIBG_HUMAN Isoform Gamma-A of Fibrinogen gamma chain OS=Homo sapiens GN=FGG;tr|C9JEU5|C9JEU5_HUMAN Fibrinogen gamma chain OS=Homo sapiens GN=FGG PE=1 SV=1;	1126700	2373700	321940	819930	61654	81747	27329	25912	9	13	13	8	11	3	2	1	2	13	13	8	11	3	2	1	2	49.496	0	48.193	By MS/MS	By MS/MS	By MS/MS	By MS/MS	By MS/MS	By matching	By matching	By MS/MS	44.9	39.6	25.9	36.6	7.1	5	2.7	4.8	30420000	64089000	8692300	22138000
tr|B3KNB4|B3KNB4_HUMANcDNAFLJ14168fis,cloneNT2RP2001440,highlysimilarto14-3-3proteingammaOS=HomosapiensPE=2SV=1;sp|P61981|1433G_HUMAN14-3-3proteingammaOS=HomosapiensGN=YWHAGPE=1SV=2;tr|B4DHC4|B4DHC4_HUMANcDNAFLJ51843,highlysimilarto14-3-3proteingammaOS=HomosapiensPE=2SV=1;tr|B4DE78|B4DE78_HUMANcDNAFLJ52141,highlysimilarto14-3-3proteingammaOS=HomosapiensPE=2SV=1	tr|B3KNB4|B3KNB4_HUMAN cDNA FLJ14168 fis, clone NT2RP2001440, highly similar to 14-3-3 protein gamma OS=Homo sapiens PE=2 SV=1;sp|P61981|1433G_HUMAN 14-3-3 protein gamma OS=Homo sapiens GN=YWHAG PE=1 SV=2;tr|B4DHC4|B4DHC4_HUMAN cDNA FLJ51843, highly simila	1112000	5055800	5460500	3840000	2034800	5884900	2809800	2483200	4	8	7	7	8	7	8	7	6	6	5	5	6	6	6	5	5	28.242	0	30.249	By MS/MS	By MS/MS	By MS/MS	By MS/MS	By MS/MS	By MS/MS	By MS/MS	By MS/MS	36.8	29.1	29.1	36.8	29.1	36.8	25.1	21.1	17791000	80894000	87368000	61440000
sp|P00390-2|GSHR_HUMANIsoformCytoplasmicofGlutathionereductase,mitochondrialOS=HomosapiensGN=GSR;sp|P00390-3|GSHR_HUMANIsoform2ofGlutathionereductase,mitochondrialOS=HomosapiensGN=GSR;tr|V9HW90|V9HW90_HUMANEpididymisluminalprotein75OS=HomosapiensGN=HEL-75PE=2SV=1;sp|P00390|GSHR_HUMANGlutathionereductase,mitochondrialOS=HomosapiensGN=GSRPE=1SV=2;sp|P00390-5|GSHR_HUMANIsoform4ofGlutathionereductase…	sp|P00390-2|GSHR_HUMAN Isoform Cytoplasmic of Glutathione reductase, mitochondrial OS=Homo sapiens GN=GSR;sp|P00390-3|GSHR_HUMAN Isoform 2 of Glutathione reductase, mitochondrial OS=Homo sapiens GN=GSR;tr|V9HW90|V9HW90_HUMAN Epididymis luminal protein 75 O	1105800	834060	1080600	1412900	330960	1816600	709430	660680	9	9	6	6	9	6	8	8	6	9	6	6	9	6	8	8	6	51.7	0	24.837	By MS/MS	By MS/MS	By MS/MS	By MS/MS	By MS/MS	By MS/MS	By MS/MS	By MS/MS	31.1	20.3	18	31.1	20.7	29.6	24	15.7	23222000	17515000	22692000	29671000
tr|A0A024RBV7|A0A024RBV7_HUMANGlycoproteinM6B,isoformCRA_bOS=HomosapiensGN=GPM6BPE=4SV=1;sp|Q13491|GPM6B_HUMANNeuronalmembraneglycoproteinM6-bOS=HomosapiensGN=GPM6BPE=1SV=2;tr|C9J028|C9J028_HUMANNeuronalmembraneglycoproteinM6-b(Fragment)OS=HomosapiensGN=GPM6BPE=1SV=1;sp|Q13491-2|GPM6B_HUMANIsoform2ofNeuronalmembraneglycoproteinM6-bOS=HomosapiensGN=GPM6B;tr|B7Z248|B7Z248_HUMANNeuronalmembraneglyco…	tr|A0A024RBV7|A0A024RBV7_HUMAN Glycoprotein M6B, isoform CRA_b OS=Homo sapiens GN=GPM6B PE=4 SV=1;sp|Q13491|GPM6B_HUMAN Neuronal membrane glycoprotein M6-b OS=Homo sapiens GN=GPM6B PE=1 SV=2;tr|C9J028|C9J028_HUMAN Neuronal membrane glycoprotein M6-b (Fragm	1105400	7215000	2737300	5256900	318700	5191500	3166900	2472300	5	6	7	6	6	7	7	8	8	1	1	1	1	1	1	1	1	28.989	0.0018639	1.7505	By MS/MS	By MS/MS	By MS/MS	By MS/MS	By MS/MS	By MS/MS	By MS/MS	By MS/MS	22.3	22.3	22.3	22.3	22.3	22.3	25.7	25.7	5527100	36075000	13687000	26285000
tr|E9PQH6|E9PQH6_HUMANRho-relatedGTP-bindingproteinRhoC(Fragment)OS=HomosapiensGN=RHOCPE=1SV=1;tr|Q5JR08|Q5JR08_HUMANRho-relatedGTP-bindingproteinRhoC(Fragment)OS=HomosapiensGN=RHOCPE=1SV=8;tr|A0A024R0I3|A0A024R0I3_HUMANHCG2043376,isoformCRA_bOS=HomosapiensGN=hCG_2043376PE=3SV=1;sp|P08134|RHOC_HUMANRho-relatedGTP-bindingproteinRhoCOS=HomosapiensGN=RHOCPE=1SV=1;tr|Q5JR07|Q5JR07_HUMANRho-relatedGTP…	tr|E9PQH6|E9PQH6_HUMAN Rho-related GTP-binding protein RhoC (Fragment) OS=Homo sapiens GN=RHOC PE=1 SV=1;tr|Q5JR08|Q5JR08_HUMAN Rho-related GTP-binding protein RhoC (Fragment) OS=Homo sapiens GN=RHOC PE=1 SV=8;tr|A0A024R0I3|A0A024R0I3_HUMAN HCG2043376, iso	1097100	2330000	2245500	2100400	795820	788920	166490	648690	14	7	7	7	7	4	3	3	3	1	1	1	1	1	1	0	0	19.224	0	11.565	By MS/MS	By MS/MS	By MS/MS	By MS/MS	By MS/MS	By MS/MS	By matching	By MS/MS	38.5	38.5	38.5	38.5	27.2	23.7	21.9	21.9	7679900	16310000	15719000	14703000
sp|P43034|LIS1_HUMANPlatelet-activatingfactoracetylhydrolaseIBsubunitalphaOS=HomosapiensGN=PAFAH1B1PE=1SV=2;tr|B4DZN3|B4DZN3_HUMANcDNAFLJ51164,highlysimilartoPlatelet-activatingfactoracetylhydrolaseIBalphasubunitOS=HomosapiensPE=2SV=1;tr|B4DF38|B4DF38_HUMANcDNAFLJ52123,highlysimilartoPlatelet-activatingfactoracetylhydrolaseIBalphasubunitOS=HomosapiensPE=2SV=1;tr|I3L3N5|I3L3N5_HUMANPlatelet-activa…	sp|P43034|LIS1_HUMAN Platelet-activating factor acetylhydrolase IB subunit alpha OS=Homo sapiens GN=PAFAH1B1 PE=1 SV=2;tr|B4DZN3|B4DZN3_HUMAN cDNA FLJ51164, highly similar to Platelet-activating factor acetylhydrolase IB alpha subunit OS=Homo sapiens PE=2	1085000	3631800	3097900	2504000	701610	2677500	329980	173260	6	14	11	10	12	7	9	7	4	14	11	10	12	7	9	7	4	46.637	0	65.13	By MS/MS	By MS/MS	By MS/MS	By MS/MS	By MS/MS	By MS/MS	By MS/MS	By MS/MS	47.8	34.1	34.1	45.6	22.9	31.2	24.9	12.4	24956000	83532000	71253000	57593000
sp|P52209-2|6PGD_HUMANIsoform2of6-phosphogluconatedehydrogenase,decarboxylatingOS=HomosapiensGN=PGD;sp|P52209|6PGD_HUMAN6-phosphogluconatedehydrogenase,decarboxylatingOS=HomosapiensGN=PGDPE=1SV=3;tr|B4E2U0|B4E2U0_HUMAN6-phosphogluconatedehydrogenase,decarboxylatingOS=HomosapiensPE=2SV=1;tr|K7EM49|K7EM49_HUMAN6-phosphogluconatedehydrogenase,decarboxylating(Fragment)OS=HomosapiensGN=PGDPE=1SV=1;tr|…	sp|P52209-2|6PGD_HUMAN Isoform 2 of 6-phosphogluconate dehydrogenase, decarboxylating OS=Homo sapiens GN=PGD;sp|P52209|6PGD_HUMAN 6-phosphogluconate dehydrogenase, decarboxylating OS=Homo sapiens GN=PGD PE=1 SV=3;tr|B4E2U0|B4E2U0_HUMAN 6-phosphogluconate d	1083400	570980	1014400	1483100	188740	1149800	414650	592590	10	9	6	6	9	5	8	7	6	9	6	6	9	5	8	7	6	51.872	0	40.968	By MS/MS	By MS/MS	By MS/MS	By MS/MS	By MS/MS	By MS/MS	By MS/MS	By MS/MS	24.3	15.7	15.7	24.3	11.3	22.6	20	15.7	27086000	14275000	25360000	37078000
tr|A8K4W5|A8K4W5_HUMANcDNAFLJ76813,highlysimilartoHomosapiensacetyl-CoenzymeAacetyltransferase2(acetoacetylCoenzymeAthiolase),mRNAOS=HomosapiensPE=2SV=1;sp|Q9BWD1|THIC_HUMANAcetyl-CoAacetyltransferase,cytosolicOS=HomosapiensGN=ACAT2PE=1SV=2;tr|Q59GW6|Q59GW6_HUMANAcetyl-CoAacetyltransferase,cytosolicvariant(Fragment)OS=HomosapiensPE=2SV=1;sp|Q9BWD1-2|THIC_HUMANIsoform2ofAcetyl-CoAacetyltransferase…	tr|A8K4W5|A8K4W5_HUMAN cDNA FLJ76813, highly similar to Homo sapiens acetyl-Coenzyme A acetyltransferase 2 (acetoacetyl Coenzyme A thiolase), mRNA OS=Homo sapiens PE=2 SV=1;sp|Q9BWD1|THIC_HUMAN Acetyl-CoA acetyltransferase, cytosolic OS=Homo sapiens GN=ACA	1080800	2049200	1380200	1048800	309920	526540	641650	983750	4	11	7	6	9	2	6	4	4	11	7	6	9	2	6	4	4	41.378	0	44.524	By MS/MS	By MS/MS	By MS/MS	By MS/MS	By MS/MS	By MS/MS	By MS/MS	By MS/MS	42.3	25.4	25.4	42.3	8.8	29	15.9	15.9	18373000	34836000	23463000	17829000
tr|B4DZ84|B4DZ84_HUMANMAGUKp55subfamilymember2OS=HomosapiensGN=MPP2PE=1SV=1;sp|Q14168-6|MPP2_HUMANIsoform6ofMAGUKp55subfamilymember2OS=HomosapiensGN=MPP2;tr|D3DX48|D3DX48_HUMANMAGUKp55subfamilymember2OS=HomosapiensGN=MPP2PE=1SV=1;sp|Q14168-2|MPP2_HUMANIsoform2ofMAGUKp55subfamilymember2OS=HomosapiensGN=MPP2;tr|B4DRL7|B4DRL7_HUMANcDNAFLJ50419,highlysimilartoMAGUKp55subfamilymember2OS=HomosapiensPE=…	tr|B4DZ84|B4DZ84_HUMAN MAGUK p55 subfamily member 2 OS=Homo sapiens GN=MPP2 PE=1 SV=1;sp|Q14168-6|MPP2_HUMAN Isoform 6 of MAGUK p55 subfamily member 2 OS=Homo sapiens GN=MPP2;tr|D3DX48|D3DX48_HUMAN MAGUK p55 subfamily member 2 OS=Homo sapiens GN=MPP2 PE=1	1073700	863450	750380	1754700	326740	1612100	409490	202160	23	13	11	10	14	10	12	10	5	11	9	8	12	8	10	8	4	60.516	0	39.501	By MS/MS	By MS/MS	By MS/MS	By MS/MS	By MS/MS	By MS/MS	By MS/MS	By MS/MS	29.8	22.4	22.2	29.8	19	26.1	19.2	11.1	33283000	26767000	23262000	54394000
tr|Q0VAS5|Q0VAS5_HUMANHistoneH4OS=HomosapiensGN=HIST1H4HPE=2SV=1;tr|B2R4R0|B2R4R0_HUMANHistoneH4OS=HomosapiensGN=HIST1H4LPE=2SV=1;sp|P62805|H4_HUMANHistoneH4OS=HomosapiensGN=HIST1H4APE=1SV=2;tr|Q6B823|Q6B823_HUMANHistoneH4(Fragment)OS=HomosapiensPE=3SV=1	tr|Q0VAS5|Q0VAS5_HUMAN Histone H4 OS=Homo sapiens GN=HIST1H4H PE=2 SV=1;tr|B2R4R0|B2R4R0_HUMAN Histone H4 OS=Homo sapiens GN=HIST1H4L PE=2 SV=1;sp|P62805|H4_HUMAN Histone H4 OS=Homo sapiens GN=HIST1H4A PE=1 SV=2	1073100	1709700	3357100	1099200	1177400	2374100	322130	202950	4	2	3	3	3	3	2	3	3	2	3	3	3	3	2	3	3	11.314	0	5.0686	By MS/MS	By MS/MS	By MS/MS	By MS/MS	By MS/MS	By MS/MS	By MS/MS	By matching	19.4	29.1	29.1	29.1	29.1	19.4	29.1	29.1	6438300	10258000	20143000	6595000
sp|Q5VUB5|F1711_HUMANProteinFAM171A1OS=HomosapiensGN=FAM171A1PE=1SV=1;tr|Q9Y438|Q9Y438_HUMANUncharacterizedproteinDKFZp564A026(Fragment)OS=HomosapiensGN=DKFZp564A026PE=2SV=1;tr|B3KMX9|B3KMX9_HUMANcDNAFLJ12884fis,cloneNT2RP2003984,highlysimilartoHomosapiensmRNA;cDNADKFZp564A026(fromcloneDKFZp564A026)OS=HomosapiensPE=2SV=1;tr|Q5SW12|Q5SW12_HUMANProteinFAM171A1(Fragment)OS=HomosapiensGN=FAM171A1PE=1…	sp|Q5VUB5|F1711_HUMAN Protein FAM171A1 OS=Homo sapiens GN=FAM171A1 PE=1 SV=1;tr|Q9Y438|Q9Y438_HUMAN Uncharacterized protein DKFZp564A026 (Fragment) OS=Homo sapiens GN=DKFZp564A026 PE=2 SV=1;tr|B3KMX9|B3KMX9_HUMAN cDNA FLJ12884 fis, clone NT2RP2003984, high	1043000	151510	184190	975090	29415	430040	101250	53523	4	18	7	7	16	3	7	4	3	17	6	6	15	3	7	3	3	97.853	0	46.378	By MS/MS	By MS/MS	By MS/MS	By MS/MS	By MS/MS	By MS/MS	By MS/MS	By MS/MS	32.4	9.6	9.6	24.9	3.9	15.7	6.2	4.2	38590000	5605800	6814900	36078000
tr|V9HWG7|V9HWG7_HUMANEpididymissecretoryproteinLi52OS=HomosapiensGN=HEL-S-52PE=2SV=1;tr|Q53H17|Q53H17_HUMANWDrepeat-containingprotein1isoform1variant(Fragment)OS=HomosapiensPE=2SV=1;tr|Q53GN4|Q53GN4_HUMANWDrepeatdomain1,isoformCRA_a(Fragment)OS=HomosapiensGN=WDR1PE=2SV=1;sp|O75083|WDR1_HUMANWDrepeat-containingprotein1OS=HomosapiensGN=WDR1PE=1SV=4;tr|Q59ER5|Q59ER5_HUMANWDrepeat-containingprotein1…	tr|V9HWG7|V9HWG7_HUMAN Epididymis secretory protein Li 52 OS=Homo sapiens GN=HEL-S-52 PE=2 SV=1;tr|Q53H17|Q53H17_HUMAN WD repeat-containing protein 1 isoform 1 variant (Fragment) OS=Homo sapiens PE=2 SV=1;tr|Q53GN4|Q53GN4_HUMAN WD repeat domain 1, isoform	1039700	800900	1127900	1617900	190680	1627000	286830	169370	11	16	12	11	16	7	12	9	7	16	12	11	16	7	12	9	7	66.193	0	78.557	By MS/MS	By MS/MS	By MS/MS	By MS/MS	By MS/MS	By MS/MS	By MS/MS	By MS/MS	42.4	24.6	23.6	45.5	12.5	32	20.8	14.5	31192000	24027000	33838000	48536000
tr|Q0QEN7|Q0QEN7_HUMANATPsynthasesubunitbeta(Fragment)OS=HomosapiensGN=ATP5BPE=2SV=1;tr|V9HW31|V9HW31_HUMANATPsynthasesubunitbetaOS=HomosapiensGN=HEL-S-271PE=1SV=1;sp|P06576|ATPB_HUMANATPsynthasesubunitbeta,mitochondrialOS=HomosapiensGN=ATP5BPE=1SV=3;tr|H0YH81|H0YH81_HUMANATPsynthasesubunitbeta(Fragment)OS=HomosapiensGN=ATP5BPE=1SV=1;tr|F8W079|F8W079_HUMANATPsynthasesubunitbeta,mitochondrial(Frag…	tr|Q0QEN7|Q0QEN7_HUMAN ATP synthase subunit beta (Fragment) OS=Homo sapiens GN=ATP5B PE=2 SV=1;tr|V9HW31|V9HW31_HUMAN ATP synthase subunit beta OS=Homo sapiens GN=HEL-S-271 PE=1 SV=1;sp|P06576|ATPB_HUMAN ATP synthase subunit beta, mitochondrial OS=Homo sap	1035200	1033100	3144200	5051200	687820	4675200	671590	116800	7	13	12	15	16	11	13	12	4	13	12	15	16	11	13	12	4	48.113	0	57.225	By MS/MS	By MS/MS	By MS/MS	By MS/MS	By MS/MS	By MS/MS	By MS/MS	By matching	44.5	41.1	51.5	55.5	36.6	39.6	39.3	10.1	22775000	22728000	69173000	111130000
sp|O14773-2|TPP1_HUMANIsoform2ofTripeptidyl-peptidase1OS=HomosapiensGN=TPP1;tr|B4DSE2|B4DSE2_HUMANcDNAFLJ57277,highlysimilartoTripeptidyl-peptidase1(EC3.4.14.9)OS=HomosapiensPE=2SV=1;tr|B4E0C7|B4E0C7_HUMANcDNAFLJ58558,highlysimilartoTripeptidyl-peptidase1(EC3.4.14.9)OS=HomosapiensPE=2SV=1;tr|Q53HP2|Q53HP2_HUMANTripeptidyl-peptidaseIvariant(Fragment)OS=HomosapiensPE=2SV=1;sp|O14773|TPP1_HUMANTripe…	sp|O14773-2|TPP1_HUMAN Isoform 2 of Tripeptidyl-peptidase 1 OS=Homo sapiens GN=TPP1;tr|B4DSE2|B4DSE2_HUMAN cDNA FLJ57277, highly similar to Tripeptidyl-peptidase 1 (EC 3.4.14.9) OS=Homo sapiens PE=2 SV=1;tr|B4E0C7|B4E0C7_HUMAN cDNA FLJ58558, highly similar	1035100	120650	122470	673410	0	193500	376950	1472900	9	5	2	1	4	0	2	3	3	5	2	1	4	0	2	3	3	34.463	0	21.733	By MS/MS	By matching	By matching	By MS/MS		By MS/MS	By MS/MS	By MS/MS	21.9	8.8	4.4	18.8	0	10	13.1	14.1	11387000	1327200	1347100	7407500
tr|Q6IAT1|Q6IAT1_HUMANRabGDPdissociationinhibitorOS=HomosapiensGN=GDI2PE=2SV=1;sp|P50395|GDIB_HUMANRabGDPdissociationinhibitorbetaOS=HomosapiensGN=GDI2PE=1SV=2;tr|B4DLV7|B4DLV7_HUMANRabGDPdissociationinhibitorOS=HomosapiensPE=2SV=1;sp|P50395-2|GDIB_HUMANIsoform2ofRabGDPdissociationinhibitorbetaOS=HomosapiensGN=GDI2;tr|Q8TB95|Q8TB95_HUMANRabGDPdissociationinhibitor(Fragment)OS=HomosapiensPE=2SV=1;…	tr|Q6IAT1|Q6IAT1_HUMAN Rab GDP dissociation inhibitor OS=Homo sapiens GN=GDI2 PE=2 SV=1;sp|P50395|GDIB_HUMAN Rab GDP dissociation inhibitor beta OS=Homo sapiens GN=GDI2 PE=1 SV=2;tr|B4DLV7|B4DLV7_HUMAN Rab GDP dissociation inhibitor OS=Homo sapiens PE=2 SV	1017500	482270	962890	1207600	381520	825760	311750	715290	12	27	16	16	27	15	17	17	16	18	8	8	17	7	8	9	8	50.663	0	58.973	By MS/MS	By MS/MS	By MS/MS	By MS/MS	By MS/MS	By MS/MS	By MS/MS	By MS/MS	64.3	32.6	33.3	64.5	34.8	39.1	37.3	32.4	28491000	13504000	26961000	33812000
sp|Q16352|AINX_HUMANAlpha-internexinOS=HomosapiensGN=INAPE=1SV=2;tr|Q59EM6|Q59EM6_HUMANInternexinneuronalintermediatefilamentprotein,alphavariant(Fragment)OS=HomosapiensPE=2SV=1;tr|B4DE66|B4DE66_HUMANcDNAFLJ57501,highlysimilartoAlpha-internexinOS=HomosapiensPE=2SV=1	sp|Q16352|AINX_HUMAN Alpha-internexin OS=Homo sapiens GN=INA PE=1 SV=2;tr|Q59EM6|Q59EM6_HUMAN Internexin neuronal intermediate filament protein, alpha variant (Fragment) OS=Homo sapiens PE=2 SV=1	1004300	519450	2526300	1997100	896890	2152500	916150	1480000	3	20	16	20	21	17	20	21	16	17	13	17	17	14	16	17	14	55.39	0	78.687	By MS/MS	By MS/MS	By MS/MS	By MS/MS	By MS/MS	By MS/MS	By MS/MS	By MS/MS	49.5	36.9	47.1	49.7	31.5	46.9	48.9	36.7	34147000	17661000	85894000	67902000
tr|A0A024R104|A0A024R104_HUMANContactin1,isoformCRA_aOS=HomosapiensGN=CNTN1PE=4SV=1;sp|Q12860|CNTN1_HUMANContactin-1OS=HomosapiensGN=CNTN1PE=1SV=1;sp|Q12860-2|CNTN1_HUMANIsoform2ofContactin-1OS=HomosapiensGN=CNTN1;sp|Q12860-3|CNTN1_HUMANIsoform3ofContactin-1OS=HomosapiensGN=CNTN1;tr|H0YIJ1|H0YIJ1_HUMANContactin-1(Fragment)OS=HomosapiensGN=CNTN1PE=1SV=1;tr|F8VUI9|F8VUI9_HUMANContactin-1(Fragment)O…	tr|A0A024R104|A0A024R104_HUMAN Contactin 1, isoform CRA_a OS=Homo sapiens GN=CNTN1 PE=4 SV=1;sp|Q12860|CNTN1_HUMAN Contactin-1 OS=Homo sapiens GN=CNTN1 PE=1 SV=1;sp|Q12860-2|CNTN1_HUMAN Isoform 2 of Contactin-1 OS=Homo sapiens GN=CNTN1	1002800	1139200	3194500	3026000	616540	2823900	567400	516060	9	24	17	22	25	16	26	21	16	24	17	22	25	16	26	21	16	113.32	0	80.052	By MS/MS	By MS/MS	By MS/MS	By MS/MS	By MS/MS	By MS/MS	By MS/MS	By MS/MS	33.5	19.7	26.7	34.5	17.2	34.4	24.6	18.3	53148000	60375000	169310000	160380000
sp|P48426|PI42A_HUMANPhosphatidylinositol5-phosphate4-kinasetype-2alphaOS=HomosapiensGN=PIP4K2APE=1SV=2;tr|H7BXS3|H7BXS3_HUMANPhosphatidylinositol5-phosphate4-kinasetype-2alphaOS=HomosapiensGN=PIP4K2APE=1SV=1;tr|B4DH09|B4DH09_HUMANcDNAFLJ51838,highlysimilartoPhosphatidylinositol-4-phosphate5-kinasetype-2alpha(EC2.7.1.68)OS=HomosapiensPE=2SV=1;tr|S4R320|S4R320_HUMANPhosphatidylinositol5-phosphate4…	sp|P48426|PI42A_HUMAN Phosphatidylinositol 5-phosphate 4-kinase type-2 alpha OS=Homo sapiens GN=PIP4K2A PE=1 SV=2;tr|H7BXS3|H7BXS3_HUMAN Phosphatidylinositol 5-phosphate 4-kinase type-2 alpha OS=Homo sapiens GN=PIP4K2A PE=1 SV=1;tr|B4DH09|B4DH09_HUMAN cDNA	1001800	712430	1553000	1522100	151890	825810	220470	482760	4	9	7	7	9	4	4	4	5	1	1	1	1	1	1	1	1	46.224	0	42.98	By MS/MS	By MS/MS	By MS/MS	By MS/MS	By MS/MS	By MS/MS	By MS/MS	By MS/MS	22.9	20.4	20.4	22.9	13.3	13.3	13.3	16	18032000	12824000	27954000	27398000
tr|C9J712|C9J712_HUMANProfilinOS=HomosapiensGN=PFN2PE=1SV=1;sp|P35080|PROF2_HUMANProfilin-2OS=HomosapiensGN=PFN2PE=1SV=3;tr|C9J0J7|C9J0J7_HUMANProfilinOS=HomosapiensGN=PFN2PE=1SV=1;tr|C9JQ45|C9JQ45_HUMANProfilinOS=HomosapiensGN=PFN2PE=1SV=1;sp|P35080-2|PROF2_HUMANIsoformIIbofProfilin-2OS=HomosapiensGN=PFN2;tr|G5E9Q6|G5E9Q6_HUMANProfilinOS=HomosapiensGN=PFN2PE=1SV=1;tr|B4DNH1|B4DNH1_HUMANProfilinO…	tr|C9J712|C9J712_HUMAN Profilin OS=Homo sapiens GN=PFN2 PE=1 SV=1;sp|P35080|PROF2_HUMAN Profilin-2 OS=Homo sapiens GN=PFN2 PE=1 SV=3;tr|C9J0J7|C9J0J7_HUMAN Profilin OS=Homo sapiens GN=PFN2 PE=1 SV=1;tr|C9JQ45|C9JQ45_HUMAN Profilin OS=Homo sapiens GN=PFN2 P	996030	3196400	3367100	1960100	1781200	2996400	618430	1705700	10	4	5	5	3	3	4	3	1	4	5	5	3	3	4	3	1	9.7982	0	7.409	By MS/MS	By MS/MS	By MS/MS	By MS/MS	By MS/MS	By MS/MS	By MS/MS	By MS/MS	40.7	56	56	31.9	39.6	56	40.7	15.4	4980200	15982000	16836000	9800600
tr|B2R5T1|B2R5T1_HUMANProteinkinaseCOS=HomosapiensPE=2SV=1;sp|P05129|KPCG_HUMANProteinkinaseCgammatypeOS=HomosapiensGN=PRKCGPE=1SV=3;tr|B7Z3W6|B7Z3W6_HUMANProteinkinaseCOS=HomosapiensPE=2SV=1;sp|P05129-2|KPCG_HUMANIsoform2ofProteinkinaseCgammatypeOS=HomosapiensGN=PRKCG;tr|B7Z870|B7Z870_HUMANcDNAFLJ52648,highlysimilartoProteinkinaseCgammatype(EC2.7.11.13)OS=HomosapiensPE=2SV=1;tr|Q59EZ0|Q59EZ0_HUM…	tr|B2R5T1|B2R5T1_HUMAN Protein kinase C OS=Homo sapiens PE=2 SV=1;sp|P05129|KPCG_HUMAN Protein kinase C gamma type OS=Homo sapiens GN=PRKCG PE=1 SV=3;tr|B7Z3W6|B7Z3W6_HUMAN Protein kinase C OS=Homo sapiens PE=2 SV=1;sp|P05129-2|KPCG_HUMAN Isoform 2 of Prot	974110	1942900	1784600	2589500	167600	3781700	413030	209720	8	20	18	19	22	7	21	17	8	4	3	3	4	1	6	4	1	78.456	0	73.327	By MS/MS	By MS/MS	By MS/MS	By MS/MS	By MS/MS	By MS/MS	By MS/MS	By MS/MS	40.7	31.6	32.7	43.8	9.8	42	35	12.9	35068000	69943000	64244000	93224000
sp|Q10589-2|BST2_HUMANIsoform2ofBonemarrowstromalantigen2OS=HomosapiensGN=BST2;tr|A0A024R7H5|A0A024R7H5_HUMANBonemarrowstromalcellantigen2,isoformCRA_aOS=HomosapiensGN=BST2PE=4SV=1;sp|Q10589|BST2_HUMANBonemarrowstromalantigen2OS=HomosapiensGN=BST2PE=1SV=1;tr|B4E0Z6|B4E0Z6_HUMANcDNAFLJ59809,highlysimilartoBonemarrowstromalantigen2OS=HomosapiensPE=2SV=1	sp|Q10589-2|BST2_HUMAN Isoform 2 of Bone marrow stromal antigen 2 OS=Homo sapiens GN=BST2;tr|A0A024R7H5|A0A024R7H5_HUMAN Bone marrow stromal cell antigen 2, isoform CRA_a OS=Homo sapiens GN=BST2 PE=4 SV=1;sp|Q10589|BST2_HUMAN Bone marrow stromal antigen 2	973710	486960	803930	1215900	67344	594770	916900	1484100	4	3	3	2	3	2	2	3	3	3	3	2	3	2	2	3	3	18.394	0	5.533	By MS/MS	By MS/MS	By MS/MS	By MS/MS	By matching	By MS/MS	By MS/MS	By MS/MS	19.6	19.6	14.9	19.6	13.7	13.7	19.6	19.6	7789700	3895700	6431500	9726900
tr|A0A024R1Z6|A0A024R1Z6_HUMANVesicleaminetransportprotein1homolog(Tcalifornica),isoformCRA_aOS=HomosapiensGN=VAT1PE=4SV=1;sp|Q99536|VAT1_HUMANSynapticvesiclemembraneproteinVAT-1homologOS=HomosapiensGN=VAT1PE=1SV=2;tr|B3KUF8|B3KUF8_HUMANcDNAFLJ39753fis,cloneSMINT2018343,highlysimilartoSynapticvesiclemembraneproteinVAT-1homolog(EC1.-.-.-)OS=HomosapiensPE=2SV=1;sp|Q99536-3|VAT1_HUMANIsoform3ofSynap…	tr|A0A024R1Z6|A0A024R1Z6_HUMAN Vesicle amine transport protein 1 homolog (T californica), isoform CRA_a OS=Homo sapiens GN=VAT1 PE=4 SV=1;sp|Q99536|VAT1_HUMAN Synaptic vesicle membrane protein VAT-1 homolog OS=Homo sapiens GN=VAT1 PE=1 SV=2;tr|B3KUF8|B3KUF	973350	96157	817130	1037900	73585	176460	85330	276770	11	9	3	6	8	2	2	3	3	9	3	6	8	2	2	3	3	41.92	0	29.91	By MS/MS	By matching	By MS/MS	By MS/MS	By MS/MS	By matching	By MS/MS	By MS/MS	35.4	7.9	19.3	28.8	6.6	6.6	10.7	10.4	15574000	1538500	13074000	16606000
tr|V9HWG1|V9HWG1_HUMANEpididymissecretoryspermbindingproteinLi134POS=HomosapiensGN=HEL-S-134PPE=2SV=1;sp|Q13228|SBP1_HUMANSelenium-bindingprotein1OS=HomosapiensGN=SELENBP1PE=1SV=2;sp|Q13228-4|SBP1_HUMANIsoform4ofSelenium-bindingprotein1OS=HomosapiensGN=SELENBP1;sp|Q13228-2|SBP1_HUMANIsoform2ofSelenium-bindingprotein1OS=HomosapiensGN=SELENBP1;sp|Q13228-3|SBP1_HUMANIsoform3ofSelenium-bindingprotein…	tr|V9HWG1|V9HWG1_HUMAN Epididymis secretory sperm binding protein Li 134P OS=Homo sapiens GN=HEL-S-134P PE=2 SV=1;sp|Q13228|SBP1_HUMAN Selenium-binding protein 1 OS=Homo sapiens GN=SELENBP1 PE=1 SV=2;sp|Q13228-4|SBP1_HUMAN Isoform 4 of Selenium-binding pro	972360	316020	558960	885170	77376	1069400	686760	240920	12	13	10	11	13	5	13	13	7	13	10	11	13	5	13	13	7	52.39	0	57.24	By MS/MS	By MS/MS	By MS/MS	By MS/MS	By MS/MS	By MS/MS	By MS/MS	By MS/MS	32.2	22.7	25	34.1	12.7	34.5	32.6	18	30143000	9796600	17328000	27440000
tr|J3QRP2|J3QRP2_HUMANCKLF-likeMARVELtransmembranedomain-containingprotein4(Fragment)OS=HomosapiensGN=CMTM4PE=1SV=1;sp|Q8IZR5-3|CKLF4_HUMANIsoform3ofCKLF-likeMARVELtransmembranedomain-containingprotein4OS=HomosapiensGN=CMTM4;sp|Q8IZR5-2|CKLF4_HUMANIsoform2ofCKLF-likeMARVELtransmembranedomain-containingprotein4OS=HomosapiensGN=CMTM4;sp|Q8IZR5|CKLF4_HUMANCKLF-likeMARVELtransmembranedomain-containin…	tr|J3QRP2|J3QRP2_HUMAN CKLF-like MARVEL transmembrane domain-containing protein 4 (Fragment) OS=Homo sapiens GN=CMTM4 PE=1 SV=1;sp|Q8IZR5-3|CKLF4_HUMAN Isoform 3 of CKLF-like MARVEL transmembrane domain-containing protein 4 OS=Homo sapiens GN=CMTM4;sp|Q8IZ	962560	3898300	2382200	1849300	716230	4190000	979020	663620	4	2	2	2	2	2	2	2	2	2	2	2	2	2	2	2	2	15.77	0.00050277	2.2344	By MS/MS	By MS/MS	By MS/MS	By MS/MS	By MS/MS	By MS/MS	By MS/MS	By MS/MS	13.6	13.6	13.6	13.6	13.6	13.6	13.6	13.6	4812800	19491000	11911000	9246700
tr|A0A024RBX9|A0A024RBX9_HUMANPyruvatedehydrogenaseE1componentsubunitalphaOS=HomosapiensGN=PDHA1PE=4SV=1;sp|P08559|ODPA_HUMANPyruvatedehydrogenaseE1componentsubunitalpha,somaticform,mitochondrialOS=HomosapiensGN=PDHA1PE=1SV=3;sp|P08559-4|ODPA_HUMANIsoform4ofPyruvatedehydrogenaseE1componentsubunitalpha,somaticform,mitochondrialOS=HomosapiensGN=PDHA1;sp|P08559-3|ODPA_HUMANIsoform3ofPyruvatedehydrog…	tr|A0A024RBX9|A0A024RBX9_HUMAN Pyruvate dehydrogenase E1 component subunit alpha OS=Homo sapiens GN=PDHA1 PE=4 SV=1;sp|P08559|ODPA_HUMAN Pyruvate dehydrogenase E1 component subunit alpha, somatic form, mitochondrial OS=Homo sapiens GN=PDHA1 PE=1 SV=3;sp|P0	956740	1368200	2221300	3595000	276930	4838700	1121500	229870	20	14	7	10	17	6	17	14	11	14	7	10	17	6	17	14	11	43.295	0	56.879	By MS/MS	By MS/MS	By MS/MS	By MS/MS	By MS/MS	By MS/MS	By MS/MS	By MS/MS	50.3	15.6	24.9	54.1	14.6	55.1	36.4	24.1	21048000	30101000	48868000	79090000
tr|A0A024QZF2|A0A024QZF2_HUMANRelatedRASviral(R-ras)oncogenehomolog,isoformCRA_aOS=HomosapiensGN=RRASPE=4SV=1;sp|P10301|RRAS_HUMANRas-relatedproteinR-RasOS=HomosapiensGN=RRASPE=1SV=1	tr|A0A024QZF2|A0A024QZF2_HUMAN Related RAS viral (R-ras) oncogene homolog, isoform CRA_a OS=Homo sapiens GN=RRAS PE=4 SV=1;sp|P10301|RRAS_HUMAN Ras-related protein R-Ras OS=Homo sapiens GN=RRAS PE=1 SV=1	956070	588530	678340	1272800	222650	1203200	353300	770840	2	8	6	6	8	3	7	7	6	6	5	5	6	2	5	5	5	23.48	0	29.898	By MS/MS	By MS/MS	By MS/MS	By MS/MS	By MS/MS	By MS/MS	By MS/MS	By MS/MS	49.1	36.2	36.2	49.1	16.5	32.6	35.3	28	14341000	8828000	10175000	19093000
tr|A8K287|A8K287_HUMANSynaptosomal-associatedproteinOS=HomosapiensGN=SNAP23PE=1SV=1;sp|O00161|SNP23_HUMANSynaptosomal-associatedprotein23OS=HomosapiensGN=SNAP23PE=1SV=1;tr|H3BM38|H3BM38_HUMANSynaptosomal-associatedprotein(Fragment)OS=HomosapiensGN=SNAP23PE=1SV=1;tr|H3BV99|H3BV99_HUMANSynaptosomal-associatedprotein(Fragment)OS=HomosapiensGN=SNAP23PE=1SV=1;tr|H3BP15|H3BP15_HUMANSynaptosomal-associa…	tr|A8K287|A8K287_HUMAN Synaptosomal-associated protein OS=Homo sapiens GN=SNAP23 PE=1 SV=1;sp|O00161|SNP23_HUMAN Synaptosomal-associated protein 23 OS=Homo sapiens GN=SNAP23 PE=1 SV=1;tr|H3BM38|H3BM38_HUMAN Synaptosomal-associated protein (Fragment) OS=Hom	955050	426580	794890	748280	74730	554760	339410	833180	14	7	5	4	5	2	3	6	6	7	5	4	5	2	3	6	6	23.354	0	32.64	By MS/MS	By MS/MS	By MS/MS	By matching	By MS/MS	By MS/MS	By MS/MS	By MS/MS	58.3	37.4	26.1	38.4	12.8	21.3	43.1	43.1	11461000	5119000	9538700	8979400
sp|P23526|SAHH_HUMANAdenosylhomocysteinaseOS=HomosapiensGN=AHCYPE=1SV=4;sp|P23526-2|SAHH_HUMANIsoform2ofAdenosylhomocysteinaseOS=HomosapiensGN=AHCY;tr|Q1RMG2|Q1RMG2_HUMANAdenosylhomocysteinaseOS=HomosapiensGN=AHCYPE=2SV=1	sp|P23526|SAHH_HUMAN Adenosylhomocysteinase OS=Homo sapiens GN=AHCY PE=1 SV=4;sp|P23526-2|SAHH_HUMAN Isoform 2 of Adenosylhomocysteinase OS=Homo sapiens GN=AHCY;tr|Q1RMG2|Q1RMG2_HUMAN Adenosylhomocysteinase OS=Homo sapiens GN=AHCY PE=2 SV=1	953630	1484300	1603800	1585200	371510	2109800	588500	721970	3	12	11	12	10	11	12	12	12	12	11	12	10	11	12	12	12	47.716	0	26.876	By MS/MS	By MS/MS	By MS/MS	By MS/MS	By MS/MS	By MS/MS	By MS/MS	By MS/MS	29.9	25	28.5	28	25	33.3	33.3	33.3	19073000	29687000	32076000	31704000
tr|Q53SS8|Q53SS8_HUMANEpididymissecretoryproteinLi85OS=HomosapiensGN=PCBP1PE=2SV=1;sp|Q15365|PCBP1_HUMANPoly(rC)-bindingprotein1OS=HomosapiensGN=PCBP1PE=1SV=2	tr|Q53SS8|Q53SS8_HUMAN Epididymis secretory protein Li 85 OS=Homo sapiens GN=PCBP1 PE=2 SV=1;sp|Q15365|PCBP1_HUMAN Poly(rC)-binding protein 1 OS=Homo sapiens GN=PCBP1 PE=1 SV=2	953520	579780	1373900	1605500	240980	1831600	910440	1113400	2	7	4	5	7	4	7	7	7	6	4	4	6	2	5	5	5	37.497	0	26.146	By MS/MS	By MS/MS	By MS/MS	By MS/MS	By MS/MS	By MS/MS	By MS/MS	By MS/MS	34.6	15.2	18.3	34.6	15.7	29.8	26.4	26.4	16210000	9856200	23356000	27294000
tr|V9HW63|V9HW63_HUMANEpididymissecretoryspermbindingproteinLi97nOS=HomosapiensGN=HEL-S-97nPE=2SV=1;sp|Q13162|PRDX4_HUMANPeroxiredoxin-4OS=HomosapiensGN=PRDX4PE=1SV=1;tr|H7C3T4|H7C3T4_HUMANPeroxiredoxin-4(Fragment)OS=HomosapiensGN=PRDX4PE=1SV=1;tr|A6NJJ0|A6NJJ0_HUMANPeroxiredoxin-4(Fragment)OS=HomosapiensGN=PRDX4PE=1SV=1;tr|A6NG45|A6NG45_HUMANPeroxiredoxin-4OS=HomosapiensGN=PRDX4PE=1SV=1	tr|V9HW63|V9HW63_HUMAN Epididymis secretory sperm binding protein Li 97n OS=Homo sapiens GN=HEL-S-97n PE=2 SV=1;sp|Q13162|PRDX4_HUMAN Peroxiredoxin-4 OS=Homo sapiens GN=PRDX4 PE=1 SV=1;tr|H7C3T4|H7C3T4_HUMAN Peroxiredoxin-4 (Fragment) OS=Homo sapiens GN=PR	946270	85871	262960	1185800	34630	246120	248920	61081	5	13	4	5	12	3	5	7	3	11	3	3	10	2	3	5	2	30.54	0	30.798	By MS/MS	By matching	By MS/MS	By MS/MS	By MS/MS	By MS/MS	By MS/MS	By MS/MS	62	16.6	16.6	56.8	10.7	17	31.4	10.7	15140000	1373900	4207400	18974000
tr|A0A1X9WEH5|A0A1X9WEH5_HUMANUreatransporterB1OS=HomosapiensGN=SLC14A1PE=2SV=1;tr|A0A068W8S0|A0A068W8S0_HUMANUreatransporterOS=HomosapiensGN=SLC14A1PE=3SV=1;tr|G0W2N5|G0W2N5_HUMANUreatransporterOS=HomosapiensGN=SLC14A1JKPE=3SV=1;tr|F6IQ87|F6IQ87_HUMANUreatransporterOS=HomosapiensGN=SLC14A1JKPE=3SV=1;tr|A0A1A9C9I1|A0A1A9C9I1_HUMANUreatransporterOS=HomosapiensGN=JKPE=3SV=1;tr|A0A1A9C8P1|A0A1A9C8P1…	tr|A0A1X9WEH5|A0A1X9WEH5_HUMAN Urea transporter B1 OS=Homo sapiens GN=SLC14A1 PE=2 SV=1;tr|A0A068W8S0|A0A068W8S0_HUMAN Urea transporter OS=Homo sapiens GN=SLC14A1 PE=3 SV=1;tr|G0W2N5|G0W2N5_HUMAN Urea transporter OS=Homo sapiens GN=SLC14A1 JK PE=3 SV=1;tr|	937780	1611800	1261500	1270700	506220	746110	176570	220790	24	3	3	2	2	2	2	2	2	3	3	2	2	2	2	2	2	41.641	0.00054825	2.8025	By MS/MS	By MS/MS	By MS/MS	By MS/MS	By MS/MS	By MS/MS	By matching	By matching	6.6	6.6	3.9	3.9	3.9	3.9	3.9	3.9	7502200	12895000	10092000	10165000
sp|P17600|SYN1_HUMANSynapsin-1OS=HomosapiensGN=SYN1PE=1SV=3;tr|A0A1W2PS00|A0A1W2PS00_HUMANSynapsin-1(Fragment)OS=HomosapiensGN=SYN1PE=1SV=1	sp|P17600|SYN1_HUMAN Synapsin-1 OS=Homo sapiens GN=SYN1 PE=1 SV=3	929360	2820500	4710400	6274900	1304500	14900000	2195800	297250	2	22	23	23	26	19	28	27	13	1	0	1	2	0	3	2	0	74.111	0	220.09	By MS/MS	By MS/MS	By MS/MS	By MS/MS	By MS/MS	By MS/MS	By MS/MS	By MS/MS	48.8	51.9	55	60.4	42.3	63.1	63.4	30.2	37174000	112820000	188420000	251000000
tr|A0A140VK56|A0A140VK56_HUMANTransaldolaseOS=HomosapiensPE=2SV=1;sp|P37837|TALDO_HUMANTransaldolaseOS=HomosapiensGN=TALDO1PE=1SV=2;tr|F2Z393|F2Z393_HUMANTransaldolaseOS=HomosapiensGN=TALDO1PE=1SV=1;tr|B4DID5|B4DID5_HUMANTransaldolase1,isoformCRA_cOS=HomosapiensGN=TALDO1PE=2SV=1	tr|A0A140VK56|A0A140VK56_HUMAN Transaldolase OS=Homo sapiens PE=2 SV=1;sp|P37837|TALDO_HUMAN Transaldolase OS=Homo sapiens GN=TALDO1 PE=1 SV=2;tr|F2Z393|F2Z393_HUMAN Transaldolase OS=Homo sapiens GN=TALDO1 PE=1 SV=1;tr|B4DID5|B4DID5_HUMAN Transaldolase 1,	926560	228340	665090	649660	20939	493120	365130	1115900	4	6	4	3	4	1	3	4	7	6	4	3	4	1	3	4	7	37.54	0	13.398	By MS/MS	By MS/MS	By MS/MS	By MS/MS	By MS/MS	By MS/MS	By MS/MS	By MS/MS	20.2	13.4	10.1	13.4	3.3	10.4	13.9	20.8	15752000	3881700	11307000	11044000
sp|P11216|PYGB_HUMANGlycogenphosphorylase,brainformOS=HomosapiensGN=PYGBPE=1SV=5;tr|B4DSD8|B4DSD8_HUMANAlpha-1,4glucanphosphorylaseOS=HomosapiensPE=2SV=1;tr|Q8TDG6|Q8TDG6_HUMANAlpha-1,4glucanphosphorylase(Fragment)OS=HomosapiensPE=2SV=1;tr|H0Y4Z6|H0Y4Z6_HUMANAlpha-1,4glucanphosphorylase(Fragment)OS=HomosapiensGN=PYGBPE=1SV=1	sp|P11216|PYGB_HUMAN Glycogen phosphorylase, brain form OS=Homo sapiens GN=PYGB PE=1 SV=5;tr|B4DSD8|B4DSD8_HUMAN Alpha-1,4 glucan phosphorylase OS=Homo sapiens PE=2 SV=1	916450	731020	1207000	1599500	329190	2206000	519410	875670	4	28	14	14	28	12	26	17	14	0	0	2	0	1	2	1	0	96.695	0	67.399	By MS/MS	By MS/MS	By MS/MS	By MS/MS	By MS/MS	By MS/MS	By MS/MS	By MS/MS	41.8	20.3	19.2	41.8	13.9	35.8	23.6	20	44906000	35820000	59144000	78373000
tr|A0A024RDH2|A0A024RDH2_HUMANUbiquitin-conjugatingenzymeE2D3(UBC4/5homolog,yeast),isoformCRA_aOS=HomosapiensGN=UBE2D3PE=3SV=1;sp|P61077|UB2D3_HUMANUbiquitin-conjugatingenzymeE2D3OS=HomosapiensGN=UBE2D3PE=1SV=1;sp|P61077-2|UB2D3_HUMANIsoform2ofUbiquitin-conjugatingenzymeE2D3OS=HomosapiensGN=UBE2D3;tr|D6RA11|D6RA11_HUMANUbiquitin-conjugatingenzymeE2D3(Fragment)OS=HomosapiensGN=UBE2D3PE=1SV=1;tr|D6…	tr|A0A024RDH2|A0A024RDH2_HUMAN Ubiquitin-conjugating enzyme E2D 3 (UBC4/5 homolog, yeast), isoform CRA_a OS=Homo sapiens GN=UBE2D3 PE=3 SV=1;sp|P61077|UB2D3_HUMAN Ubiquitin-conjugating enzyme E2 D3 OS=Homo sapiens GN=UBE2D3 PE=1 SV=1;sp|P61077-2|UB2D3_HUMA	908050	3701900	3390100	1493000	1161300	3998600	867390	698470	10	2	2	2	2	2	3	2	1	0	1	1	0	1	1	1	0	16.687	0	7.4181	By MS/MS	By MS/MS	By MS/MS	By MS/MS	By MS/MS	By MS/MS	By MS/MS	By MS/MS	19.7	14.3	14.3	19.7	14.3	26.5	14.3	7.5	3632200	14808000	13560000	5971900
tr|A0A024QZK4|A0A024QZK4_HUMANPhytanoyl-CoA2-hydroxylaseinteractingprotein-like,isoformCRA_bOS=HomosapiensGN=PHYHIPLPE=4SV=1;sp|Q96FC7|PHIPL_HUMANPhytanoyl-CoAhydroxylase-interactingprotein-likeOS=HomosapiensGN=PHYHIPLPE=1SV=3;sp|Q96FC7-2|PHIPL_HUMANIsoform2ofPhytanoyl-CoAhydroxylase-interactingprotein-likeOS=HomosapiensGN=PHYHIPL;sp|Q96FC7-3|PHIPL_HUMANIsoform3ofPhytanoyl-CoAhydroxylase-interact…	tr|A0A024QZK4|A0A024QZK4_HUMAN Phytanoyl-CoA 2-hydroxylase interacting protein-like, isoform CRA_b OS=Homo sapiens GN=PHYHIPL PE=4 SV=1;sp|Q96FC7|PHIPL_HUMAN Phytanoyl-CoA hydroxylase-interacting protein-like OS=Homo sapiens GN=PHYHIPL PE=1 SV=3;sp|Q96FC7-	905920	1132500	1520300	1914300	272530	1709400	428570	428960	4	12	7	8	12	5	8	6	5	10	6	7	10	4	6	5	4	42.5	0	22.892	By MS/MS	By MS/MS	By MS/MS	By MS/MS	By MS/MS	By MS/MS	By MS/MS	By MS/MS	37	20.2	25.3	37	14.1	22.3	20.2	15.7	18118000	22650000	30406000	38286000
tr|A8K2G0|A8K2G0_HUMANSecretorycarrier-associatedmembraneproteinOS=HomosapiensPE=2SV=1;sp|O15126|SCAM1_HUMANSecretorycarrier-associatedmembraneprotein1OS=HomosapiensGN=SCAMP1PE=1SV=2;tr|B4DP10|B4DP10_HUMANSecretorycarrier-associatedmembraneproteinOS=HomosapiensPE=2SV=1;tr|B4E2V7|B4E2V7_HUMANSecretorycarrier-associatedmembraneproteinOS=HomosapiensPE=2SV=1;tr|A0A087WXB0|A0A087WXB0_HUMANSecretorycar…	tr|A8K2G0|A8K2G0_HUMAN Secretory carrier-associated membrane protein OS=Homo sapiens PE=2 SV=1;sp|O15126|SCAM1_HUMAN Secretory carrier-associated membrane protein 1 OS=Homo sapiens GN=SCAMP1 PE=1 SV=2;tr|B4DP10|B4DP10_HUMAN Secretory carrier-associated mem	905890	6089600	3933500	4513700	578360	7943400	624470	101010	10	7	8	7	8	4	7	7	2	7	8	7	8	4	7	7	2	37.833	0	39.009	By MS/MS	By MS/MS	By MS/MS	By MS/MS	By MS/MS	By MS/MS	By MS/MS	By MS/MS	28.1	35.8	34.6	35.8	21.9	34.6	34.6	10.4	13588000	91344000	59003000	67706000
tr|Q53X12|Q53X12_HUMANV-typeprotonATPasesubunitaOS=HomosapiensPE=1SV=1;sp|Q93050-1|VPP1_HUMANIsoform2ofV-typeprotonATPase116kDasubunitaisoform1OS=HomosapiensGN=ATP6V0A1;sp|Q93050|VPP1_HUMANV-typeprotonATPase116kDasubunitaisoform1OS=HomosapiensGN=ATP6V0A1PE=1SV=3;sp|Q93050-3|VPP1_HUMANIsoform3ofV-typeprotonATPase116kDasubunitaisoform1OS=HomosapiensGN=ATP6V0A1;tr|Q53ET5|Q53ET5_HUMANV-typeprotonATPa…	tr|Q53X12|Q53X12_HUMAN V-type proton ATPase subunit a OS=Homo sapiens PE=1 SV=1;sp|Q93050-1|VPP1_HUMAN Isoform 2 of V-type proton ATPase 116 kDa subunit a isoform 1 OS=Homo sapiens GN=ATP6V0A1;sp|Q93050|VPP1_HUMAN V-type proton ATPase 116 kDa subunit a iso	896320	10092000	7727700	8750300	1914400	16671000	1552500	229490	29	20	19	20	23	17	26	17	9	20	19	20	23	17	26	17	9	95.75	0	141.21	By MS/MS	By MS/MS	By MS/MS	By MS/MS	By MS/MS	By MS/MS	By MS/MS	By MS/MS	27.6	24.7	25.6	27.7	24.2	30.9	24.2	11.4	28682000	322960000	247290000	280010000
tr|A8K132|A8K132_HUMANcDNAFLJ75476,highlysimilartoHomosapiensglutaminase(GLS),mRNAOS=HomosapiensPE=2SV=1;sp|O94925|GLSK_HUMANGlutaminasekidneyisoform,mitochondrialOS=HomosapiensGN=GLSPE=1SV=1;sp|O94925-3|GLSK_HUMANIsoform3ofGlutaminasekidneyisoform,mitochondrialOS=HomosapiensGN=GLS;tr|Q53TX0|Q53TX0_HUMANUncharacterizedproteinGLS(Fragment)OS=HomosapiensGN=GLSPE=4SV=1;tr|B3KM58|B3KM58_HUMANcDNAFLJ1…	tr|A8K132|A8K132_HUMAN cDNA FLJ75476, highly similar to Homo sapiens glutaminase (GLS), mRNA OS=Homo sapiens PE=2 SV=1;sp|O94925|GLSK_HUMAN Glutaminase kidney isoform, mitochondrial OS=Homo sapiens GN=GLS PE=1 SV=1;sp|O94925-3|GLSK_HUMAN Isoform 3 of Gluta	895850	1847400	1466300	2679800	492410	4004800	745020	692230	15	15	15	14	17	10	20	15	11	15	15	14	17	10	20	15	11	73.508	0	66.044	By MS/MS	By MS/MS	By MS/MS	By MS/MS	By MS/MS	By MS/MS	By MS/MS	By MS/MS	31.2	31.2	29	33.9	20.5	41.7	31.2	20.8	31355000	64658000	51322000	93795000
sp|P17858|PFKAL_HUMANATP-dependent6-phosphofructokinase,livertypeOS=HomosapiensGN=PFKLPE=1SV=6;sp|P17858-2|PFKAL_HUMANIsoform2ofATP-dependent6-phosphofructokinase,livertypeOS=HomosapiensGN=PFKL;tr|Q7L2M7|Q7L2M7_HUMANPFKLprotein(Fragment)OS=HomosapiensGN=PFKLPE=2SV=2;tr|B3KNQ7|B3KNQ7_HUMANcDNAFLJ30173fis,cloneBRACE2000969,highlysimilarto6-phosphofructokinase,livertype(EC2.7.1.11)OS=HomosapiensPE=2…	sp|P17858|PFKAL_HUMAN ATP-dependent 6-phosphofructokinase, liver type OS=Homo sapiens GN=PFKL PE=1 SV=6;sp|P17858-2|PFKAL_HUMAN Isoform 2 of ATP-dependent 6-phosphofructokinase, liver type OS=Homo sapiens GN=PFKL;tr|Q7L2M7|Q7L2M7_HUMAN PFKL protein (Fragme	892670	490920	884860	1539400	54209	708150	169630	112320	9	19	11	11	18	7	10	7	7	5	1	2	4	0	1	0	0	85.018	0	47.044	By MS/MS	By MS/MS	By MS/MS	By MS/MS	By MS/MS	By MS/MS	By MS/MS	By MS/MS	35.9	17.6	15.8	33.7	10	19.5	11.2	11.2	30351000	16691000	30085000	52338000
sp|Q9H3N1|TMX1_HUMANThioredoxin-relatedtransmembraneprotein1OS=HomosapiensGN=TMX1PE=1SV=1;tr|B4DZX7|B4DZX7_HUMANThioredoxindomaincontaining,isoformCRA_bOS=HomosapiensGN=TXNDCPE=2SV=1;tr|G3V448|G3V448_HUMANThioredoxin-relatedtransmembraneprotein1OS=HomosapiensGN=TMX1PE=1SV=1	sp|Q9H3N1|TMX1_HUMAN Thioredoxin-related transmembrane protein 1 OS=Homo sapiens GN=TMX1 PE=1 SV=1;tr|B4DZX7|B4DZX7_HUMAN Thioredoxin domain containing, isoform CRA_b OS=Homo sapiens GN=TXNDC PE=2 SV=1	892570	343610	231290	288970	38831	248370	317470	1195600	3	3	3	2	3	1	3	4	3	3	3	2	3	1	3	4	3	31.791	0	5.6385	By MS/MS	By MS/MS	By MS/MS	By matching	By matching	By matching	By MS/MS	By MS/MS	12.5	12.5	7.9	12.5	4.3	12.5	16.4	11.8	9818300	3779700	2544200	3178700
tr|V9HVY1|V9HVY1_HUMANEpididymissecretoryspermbindingproteinLi78pOS=HomosapiensGN=HEL-S-78pPE=2SV=1;sp|P02675|FIBB_HUMANFibrinogenbetachainOS=HomosapiensGN=FGBPE=1SV=2;tr|B4E1D3|B4E1D3_HUMANcDNAFLJ53952,highlysimilartoFibrinogenbetachainOS=HomosapiensPE=2SV=1;tr|D3DP13|D3DP13_HUMANFibrinogenbetachain,isoformCRA_eOS=HomosapiensGN=FGBPE=4SV=1;tr|D6REL8|D6REL8_HUMANFibrinogenbetachainOS=HomosapiensG…	tr|V9HVY1|V9HVY1_HUMAN Epididymis secretory sperm binding protein Li 78p OS=Homo sapiens GN=HEL-S-78p PE=2 SV=1;sp|P02675|FIBB_HUMAN Fibrinogen beta chain OS=Homo sapiens GN=FGB PE=1 SV=2;tr|B4E1D3|B4E1D3_HUMAN cDNA FLJ53952, highly similar to Fibrinogen b	877190	863260	291180	370890	25250	48155	8774.3	0	6	17	12	7	11	2	2	1	0	17	12	7	11	2	2	1	0	55.928	0	68.557	By MS/MS	By MS/MS	By MS/MS	By MS/MS	By MS/MS	By matching	By matching		50.3	35	23	44.6	5.7	5.7	3.1	0	24561000	24171000	8152900	10385000
tr|V9HW83|V9HW83_HUMANAldehydedehydrogenase1family,memberA1,isoformCRA_aOS=HomosapiensGN=HEL-S-53ePE=2SV=1;sp|P00352|AL1A1_HUMANRetinaldehydrogenase1OS=HomosapiensGN=ALDH1A1PE=1SV=2;tr|V9HVX6|V9HVX6_HUMANEpididymisluminalprotein9OS=HomosapiensGN=HEL-9PE=2SV=1;tr|B4DDF8|B4DDF8_HUMANcDNAFLJ51786,highlysimilartoRetinaldehydrogenase1(EC1.2.1.36)OS=HomosapiensPE=2SV=1;tr|B4DXX3|B4DXX3_HUMANcDNAFLJ5028…	tr|V9HW83|V9HW83_HUMAN Aldehyde dehydrogenase 1 family, member A1, isoform CRA_a OS=Homo sapiens GN=HEL-S-53e PE=2 SV=1;sp|P00352|AL1A1_HUMAN Retinal dehydrogenase 1 OS=Homo sapiens GN=ALDH1A1 PE=1 SV=2;tr|V9HVX6|V9HVX6_HUMAN Epididymis luminal protein 9 O	876760	238750	322790	1206900	102440	504880	153290	262840	9	16	9	8	13	5	8	9	7	14	7	6	11	3	6	7	5	54.861	0	83.612	By MS/MS	By MS/MS	By MS/MS	By MS/MS	By MS/MS	By MS/MS	By MS/MS	By MS/MS	45.7	21.8	19.6	35.9	9.4	21	20	11.4	21042000	5730000	7746900	28966000
tr|B4DJX1|B4DJX1_HUMANAcetyltransferasecomponentofpyruvatedehydrogenasecomplexOS=HomosapiensPE=2SV=1;tr|Q86YI5|Q86YI5_HUMANAcetyltransferasecomponentofpyruvatedehydrogenasecomplexOS=HomosapiensGN=DLATPE=2SV=1;tr|A0A024R3D8|A0A024R3D8_HUMANAcetyltransferasecomponentofpyruvatedehydrogenasecomplexOS=HomosapiensGN=DLATPE=3SV=1;sp|P10515|ODP2_HUMANDihydrolipoyllysine-residueacetyltransferasecomponento…	tr|B4DJX1|B4DJX1_HUMAN Acetyltransferase component of pyruvate dehydrogenase complex OS=Homo sapiens PE=2 SV=1;tr|Q86YI5|Q86YI5_HUMAN Acetyltransferase component of pyruvate dehydrogenase complex OS=Homo sapiens GN=DLAT PE=2 SV=1;tr|A0A024R3D8|A0A024R3D8_H	870290	1872000	2619700	3779600	831410	2910500	729750	784230	11	17	13	13	18	10	14	12	9	17	13	13	18	10	14	12	9	62.696	0	47.724	By MS/MS	By MS/MS	By MS/MS	By MS/MS	By MS/MS	By MS/MS	By MS/MS	By MS/MS	41.3	26.6	26.6	41.3	19	28.3	21.5	15.7	25238000	54287000	75972000	109610000
tr|Q2TB59|Q2TB59_HUMANNicotinamidenucleotidetranshydrogenaseOS=HomosapiensGN=NNTPE=2SV=1;tr|A0A024R0C3|A0A024R0C3_HUMANNicotinamidenucleotidetranshydrogenase,isoformCRA_aOS=HomosapiensGN=NNTPE=4SV=1;sp|Q13423|NNTM_HUMANNAD(P)transhydrogenase,mitochondrialOS=HomosapiensGN=NNTPE=1SV=3;tr|E9PCX7|E9PCX7_HUMANNAD(P)transhydrogenase,mitochondrialOS=HomosapiensGN=NNTPE=1SV=1;tr|D6RAI5|D6RAI5_HUMANNAD(P)…	tr|Q2TB59|Q2TB59_HUMAN Nicotinamide nucleotide transhydrogenase OS=Homo sapiens GN=NNT PE=2 SV=1;tr|A0A024R0C3|A0A024R0C3_HUMAN Nicotinamide nucleotide transhydrogenase, isoform CRA_a OS=Homo sapiens GN=NNT PE=4 SV=1;sp|Q13423|NNTM_HUMAN NAD(P) transhydrog	861230	7466800	5033600	3951800	2221400	7203700	292290	17749	11	26	29	28	28	24	29	21	3	26	29	28	28	24	29	21	3	113.88	0	81.709	By MS/MS	By MS/MS	By MS/MS	By MS/MS	By MS/MS	By MS/MS	By MS/MS	By matching	31.1	32	32	33.7	27.8	33.8	22.5	2.6	41339000	358410000	241610000	189690000
sp|Q9H228|S1PR5_HUMANSphingosine1-phosphatereceptor5OS=HomosapiensGN=S1PR5PE=2SV=1;tr|Q8WXV2|Q8WXV2_HUMANSPPR-1OS=HomosapiensPE=2SV=1;tr|A0A087WXR8|A0A087WXR8_HUMANSphingosine1-phosphatereceptor5OS=HomosapiensGN=S1PR5PE=1SV=1;sp|Q9H228-2|S1PR5_HUMANIsoform2ofSphingosine1-phosphatereceptor5OS=HomosapiensGN=S1PR5	sp|Q9H228|S1PR5_HUMAN Sphingosine 1-phosphate receptor 5 OS=Homo sapiens GN=S1PR5 PE=2 SV=1;tr|Q8WXV2|Q8WXV2_HUMAN SPPR-1 OS=Homo sapiens PE=2 SV=1;tr|A0A087WXR8|A0A087WXR8_HUMAN Sphingosine 1-phosphate receptor 5 OS=Homo sapiens GN=S1PR5 PE=1 SV=1	861020	2000500	5032700	845910	682570	1952300	143310	379830	4	8	8	8	7	6	7	4	3	8	8	8	7	6	7	4	3	41.775	0	69.937	By MS/MS	By MS/MS	By MS/MS	By MS/MS	By MS/MS	By MS/MS	By MS/MS	By MS/MS	20.4	20.4	20.4	19.1	17.8	17.1	13.1	10.8	13776000	32008000	80524000	13535000
sp|P51808|DYLT3_HUMANDyneinlightchainTctex-type3OS=HomosapiensGN=DYNLT3PE=1SV=1;tr|A6NGJ0|A6NGJ0_HUMANDyneinlightchainTctex-type3OS=HomosapiensGN=DYNLT3PE=1SV=1;tr|F2Z328|F2Z328_HUMANDyneinlightchainTctex-type3OS=HomosapiensGN=DYNLT3PE=1SV=1	sp|P51808|DYLT3_HUMAN Dynein light chain Tctex-type 3 OS=Homo sapiens GN=DYNLT3 PE=1 SV=1;tr|A6NGJ0|A6NGJ0_HUMAN Dynein light chain Tctex-type 3 OS=Homo sapiens GN=DYNLT3 PE=1 SV=1;tr|F2Z328|F2Z328_HUMAN Dynein light chain Tctex-type 3 OS=Homo sapiens GN=D	856390	2154000	1766500	1692300	275900	1847900	123220	0	3	2	2	2	2	2	2	1	0	2	2	2	2	2	2	1	0	13.062	0	5.8046	By MS/MS	By matching	By matching	By MS/MS	By matching	By MS/MS	By MS/MS		23.3	23.3	23.3	23.3	23.3	23.3	14.7	0	3425500	8615900	7065800	6769300
sp|P78352-3|DLG4_HUMANIsoform3ofDiskslargehomolog4OS=HomosapiensGN=DLG4;sp|P78352|DLG4_HUMANDiskslargehomolog4OS=HomosapiensGN=DLG4PE=1SV=3;tr|B7Z647|B7Z647_HUMANDiscs,largehomolog4(Drosophila),isoformCRA_bOS=HomosapiensGN=DLG4PE=2SV=1;tr|B9EGL1|B9EGL1_HUMANDLG4proteinOS=HomosapiensGN=DLG4PE=2SV=1;sp|P78352-2|DLG4_HUMANIsoform2ofDiskslargehomolog4OS=HomosapiensGN=DLG4;tr|B7Z4H2|B7Z4H2_HUMANcDNAFL…	sp|P78352-3|DLG4_HUMAN Isoform 3 of Disks large homolog 4 OS=Homo sapiens GN=DLG4;sp|P78352|DLG4_HUMAN Disks large homolog 4 OS=Homo sapiens GN=DLG4 PE=1 SV=3;tr|B7Z647|B7Z647_HUMAN Discs, large homolog 4 (Drosophila), isoform CRA_b OS=Homo sapiens GN=DLG4	854890	6902400	2639100	4992200	922000	6175200	478220	23969	14	23	27	24	26	17	24	19	3	22	24	21	24	15	21	18	3	80.124	0	79.134	By MS/MS	By MS/MS	By MS/MS	By MS/MS	By MS/MS	By MS/MS	By MS/MS	By matching	46	45.9	43.8	51	34.3	43.7	38.3	4	29066000	234680000	89729000	169730000
sp|P48735-2|IDHP_HUMANIsoform2ofIsocitratedehydrogenase[NADP],mitochondrialOS=HomosapiensGN=IDH2;tr|Q53GL5|Q53GL5_HUMANIsocitratedehydrogenase2(NADP+),mitochondrialvariant(Fragment)OS=HomosapiensPE=2SV=1;sp|P48735|IDHP_HUMANIsocitratedehydrogenase[NADP],mitochondrialOS=HomosapiensGN=IDH2PE=1SV=2;tr|Q13584|Q13584_HUMANIsocitratedehydrogenase[NADP]OS=HomosapiensPE=2SV=1;tr|B4DSZ6|B4DSZ6_HUMANcDNAFL…	sp|P48735-2|IDHP_HUMAN Isoform 2 of Isocitrate dehydrogenase [NADP], mitochondrial OS=Homo sapiens GN=IDH2;tr|Q53GL5|Q53GL5_HUMAN Isocitrate dehydrogenase 2 (NADP+), mitochondrial variant (Fragment) OS=Homo sapiens PE=2 SV=1;sp|P48735|IDHP_HUMAN Isocitrate	846640	561670	500470	1228200	134600	2127000	653740	609820	6	13	10	10	13	6	16	13	9	13	10	9	13	5	15	12	8	45.179	0	93.869	By MS/MS	By MS/MS	By MS/MS	By MS/MS	By MS/MS	By MS/MS	By MS/MS	By MS/MS	34	29	28	34.5	17	44	38.8	25.2	18626000	12357000	11010000	27021000
sp|Q14894|CRYM_HUMANKetiminereductasemu-crystallinOS=HomosapiensGN=CRYMPE=1SV=1;tr|I3L325|I3L325_HUMANKetiminereductasemu-crystallin(Fragment)OS=HomosapiensGN=CRYMPE=1SV=1;tr|I3NI53|I3NI53_HUMANKetiminereductasemu-crystallin(Fragment)OS=HomosapiensGN=CRYMPE=1SV=1;tr|I3L2W5|I3L2W5_HUMANKetiminereductasemu-crystallinOS=HomosapiensGN=CRYMPE=1SV=1;tr|I3L3Y1|I3L3Y1_HUMANKetiminereductasemu-crystallin(…	sp|Q14894|CRYM_HUMAN Ketimine reductase mu-crystallin OS=Homo sapiens GN=CRYM PE=1 SV=1;tr|I3L325|I3L325_HUMAN Ketimine reductase mu-crystallin (Fragment) OS=Homo sapiens GN=CRYM PE=1 SV=1;tr|I3NI53|I3NI53_HUMAN Ketimine reductase mu-crystallin (Fragment)	844260	1993100	1290500	2755500	515010	4034600	709140	1057300	6	7	6	5	7	4	7	7	5	7	6	5	7	4	7	7	5	33.775	0	17.577	By MS/MS	By MS/MS	By MS/MS	By MS/MS	By MS/MS	By MS/MS	By MS/MS	By MS/MS	35.4	24.2	21.7	35.4	13.4	28.3	28.3	17.5	11820000	27903000	18067000	38577000
tr|H7C3P7|H7C3P7_HUMANRas-relatedproteinRal-A(Fragment)OS=HomosapiensGN=RALAPE=1SV=1;sp|P11233|RALA_HUMANRas-relatedproteinRal-AOS=HomosapiensGN=RALAPE=1SV=1;tr|C9JPE8|C9JPE8_HUMANRas-relatedproteinRal-A(Fragment)OS=HomosapiensGN=RALAPE=1SV=1;tr|C9JYR1|C9JYR1_HUMANRas-relatedproteinRal-B(Fragment)OS=HomosapiensGN=RALBPE=1SV=1	tr|H7C3P7|H7C3P7_HUMAN Ras-related protein Ral-A (Fragment) OS=Homo sapiens GN=RALA PE=1 SV=1;sp|P11233|RALA_HUMAN Ras-related protein Ral-A OS=Homo sapiens GN=RALA PE=1 SV=1	833980	1555100	1412800	1106400	288460	1793900	338060	770250	4	4	3	3	4	3	3	2	2	3	3	3	3	3	3	2	2	18.26	0	16.442	By MS/MS	By MS/MS	By MS/MS	By MS/MS	By MS/MS	By MS/MS	By MS/MS	By MS/MS	34.1	18.9	18.9	34.1	18.9	18.9	17.7	17.7	5837800	10886000	9889700	7745100
tr|A0A024R7A8|A0A024R7A8_HUMANAldo-ketoreductasefamily1,memberB1(Aldosereductase),isoformCRA_aOS=HomosapiensGN=AKR1B1PE=4SV=1;sp|P15121|ALDR_HUMANAldosereductaseOS=HomosapiensGN=AKR1B1PE=1SV=3;tr|Q59EL5|Q59EL5_HUMANAldo-ketoreductasefamily1,memberB1variant(Fragment)OS=HomosapiensPE=2SV=1;tr|E9PCX2|E9PCX2_HUMANAldosereductaseOS=HomosapiensGN=AKR1B1PE=1SV=1;tr|E9PEF9|E9PEF9_HUMANAldosereductaseOS=H…	tr|A0A024R7A8|A0A024R7A8_HUMAN Aldo-keto reductase family 1, member B1 (Aldose reductase), isoform CRA_a OS=Homo sapiens GN=AKR1B1 PE=4 SV=1;sp|P15121|ALDR_HUMAN Aldose reductase OS=Homo sapiens GN=AKR1B1 PE=1 SV=3;tr|Q59EL5|Q59EL5_HUMAN Aldo-keto reductas	830880	599420	924630	1182000	111410	409700	271200	432450	5	7	6	6	7	3	4	5	4	7	6	6	7	3	4	5	4	35.853	0	16.702	By MS/MS	By MS/MS	By MS/MS	By MS/MS	By MS/MS	By MS/MS	By MS/MS	By MS/MS	32.6	23.1	19	32.6	8.2	10.8	16.5	10.8	14956000	10790000	16643000	21275000
sp|P78357|CNTP1_HUMANContactin-associatedprotein1OS=HomosapiensGN=CNTNAP1PE=1SV=1;tr|K7EMM9|K7EMM9_HUMANContactin-associatedprotein1OS=HomosapiensGN=CNTNAP1PE=1SV=1;tr|A0A024R1Y9|A0A024R1Y9_HUMANContactinassociatedprotein1,isoformCRA_aOS=HomosapiensGN=CNTNAP1PE=4SV=1	sp|P78357|CNTP1_HUMAN Contactin-associated protein 1 OS=Homo sapiens GN=CNTNAP1 PE=1 SV=1;tr|K7EMM9|K7EMM9_HUMAN Contactin-associated protein 1 OS=Homo sapiens GN=CNTNAP1 PE=1 SV=1	829950	533820	1506100	1663800	140230	756160	316170	540360	3	32	23	25	32	14	23	23	22	32	23	25	32	14	23	23	22	156.26	0	100.41	By MS/MS	By MS/MS	By MS/MS	By MS/MS	By MS/MS	By MS/MS	By MS/MS	By MS/MS	28.8	18.9	21	28.5	10.3	20	18.7	17.3	54777000	35232000	99400000	109810000
tr|B2R959|B2R959_HUMANcDNA,FLJ94229,highlysimilartoHomosapiensheterogeneousnuclearribonucleoproteinL(HNRPL),mRNAOS=HomosapiensPE=2SV=1;tr|Q6NTA2|Q6NTA2_HUMANHNRNPLprotein(Fragment)OS=HomosapiensGN=HNRNPLPE=2SV=2;sp|P14866|HNRPL_HUMANHeterogeneousnuclearribonucleoproteinLOS=HomosapiensGN=HNRNPLPE=1SV=2;tr|M0QXS5|M0QXS5_HUMANHeterogeneousnuclearribonucleoproteinL(Fragment)OS=HomosapiensGN=HNRNPLPE=…	tr|B2R959|B2R959_HUMAN cDNA, FLJ94229, highly similar to Homo sapiens heterogeneous nuclear ribonucleoprotein L (HNRPL),mRNA OS=Homo sapiens PE=2 SV=1;tr|Q6NTA2|Q6NTA2_HUMAN HNRNPL protein (Fragment) OS=Homo sapiens GN=HNRNPL PE=2 SV=2;sp|P14866|HNRPL_HUMA	822230	749660	1165800	1407500	606530	1440000	241260	290610	11	10	8	8	8	9	9	6	5	10	7	7	8	8	8	5	4	60.249	0	63.697	By MS/MS	By MS/MS	By MS/MS	By MS/MS	By MS/MS	By MS/MS	By MS/MS	By MS/MS	31.2	17.2	18.6	24.9	24.9	30.3	14.3	10.2	15622000	14244000	22150000	26743000
sp|P08133-2|ANXA6_HUMANIsoform2ofAnnexinA6OS=HomosapiensGN=ANXA6;tr|A0A0S2Z2Z6|A0A0S2Z2Z6_HUMANAnnexin(Fragment)OS=HomosapiensGN=ANXA6PE=2SV=1;sp|P08133|ANXA6_HUMANAnnexinA6OS=HomosapiensGN=ANXA6PE=1SV=3;tr|A0A0S2Z377|A0A0S2Z377_HUMANAnnexin(Fragment)OS=HomosapiensGN=ANXA6PE=2SV=1;tr|A8K3Q7|A8K3Q7_HUMANAnnexinOS=HomosapiensPE=2SV=1;tr|E5RK69|E5RK69_HUMANAnnexinOS=HomosapiensGN=ANXA6PE=1SV=1;tr|Q6…	sp|P08133-2|ANXA6_HUMAN Isoform 2 of Annexin A6 OS=Homo sapiens GN=ANXA6;tr|A0A0S2Z2Z6|A0A0S2Z2Z6_HUMAN Annexin (Fragment) OS=Homo sapiens GN=ANXA6 PE=2 SV=1;sp|P08133|ANXA6_HUMAN Annexin A6 OS=Homo sapiens GN=ANXA6 PE=1 SV=3;tr|A0A0S2Z377|A0A0S2Z377_HUMAN	809410	65896	78578	700090	14622	173110	428050	550790	16	23	8	6	21	3	7	15	16	6	4	3	6	2	2	4	6	72.423	0	76.989	By MS/MS	By matching	By MS/MS	By MS/MS	By MS/MS	By MS/MS	By MS/MS	By MS/MS	44	14.2	10.5	42.7	5.3	15.6	27.5	25.6	33995000	2767600	3300300	29404000
sp|Q9Y6C9|MTCH2_HUMANMitochondrialcarrierhomolog2OS=HomosapiensGN=MTCH2PE=1SV=1;tr|Q53G34|Q53G34_HUMANMitochondrialcarrierhomolog2variant(Fragment)OS=HomosapiensPE=2SV=1;tr|E9PIE4|E9PIE4_HUMANMitochondrialcarrierhomolog2(Fragment)OS=HomosapiensGN=MTCH2PE=1SV=8;tr|B4DHQ0|B4DHQ0_HUMANcDNAFLJ51849,highlysimilartoMitochondrialcarrierhomolog2OS=HomosapiensPE=2SV=1	sp|Q9Y6C9|MTCH2_HUMAN Mitochondrial carrier homolog 2 OS=Homo sapiens GN=MTCH2 PE=1 SV=1;tr|Q53G34|Q53G34_HUMAN Mitochondrial carrier homolog 2 variant (Fragment) OS=Homo sapiens PE=2 SV=1;tr|E9PIE4|E9PIE4_HUMAN Mitochondrial carrier homolog 2 (Fragment) O	807980	1320900	2033400	2756100	561960	4664500	375970	75870	4	7	5	4	6	5	8	4	3	7	5	4	6	5	8	4	3	33.331	0	23.433	By MS/MS	By MS/MS	By MS/MS	By MS/MS	By MS/MS	By MS/MS	By MS/MS	By matching	32.3	20.1	17.8	28.7	20.1	37.6	17.2	10.2	11312000	18493000	28468000	38585000
tr|B2RCL0|B2RCL0_HUMANProteintweetyhomologOS=HomosapiensPE=2SV=1;tr|B4DKD1|B4DKD1_HUMANProteintweetyhomologOS=HomosapiensGN=TTYH2PE=1SV=1;sp|Q9BSA4|TTYH2_HUMANProteintweetyhomolog2OS=HomosapiensGN=TTYH2PE=1SV=3;tr|Q8N3U8|Q8N3U8_HUMANProteintweetyhomolog(Fragment)OS=HomosapiensGN=DKFZp761E0417PE=2SV=1;tr|J3KRY9|J3KRY9_HUMANProteintweetyhomolog(Fragment)OS=HomosapiensGN=TTYH2PE=1SV=1	tr|B2RCL0|B2RCL0_HUMAN Protein tweety homolog OS=Homo sapiens PE=2 SV=1;tr|B4DKD1|B4DKD1_HUMAN Protein tweety homolog OS=Homo sapiens GN=TTYH2 PE=1 SV=1;sp|Q9BSA4|TTYH2_HUMAN Protein tweety homolog 2 OS=Homo sapiens GN=TTYH2 PE=1 SV=3	805180	277530	378660	521860	96766	289620	203090	580350	5	6	3	2	4	2	3	4	5	6	3	2	4	2	3	4	5	58.8	0	21.92	By MS/MS	By MS/MS	By MS/MS	By MS/MS	By MS/MS	By MS/MS	By MS/MS	By MS/MS	12.7	5.1	3.6	9.2	3.6	7.7	5.1	9.2	12883000	4440400	6058600	8349700
tr|A0A0C4DGL8|A0A0C4DGL8_HUMANHaptoglobinOS=HomosapiensGN=HPPE=1SV=1;sp|P00738-2|HPT_HUMANIsoform2ofHaptoglobinOS=HomosapiensGN=HP;tr|J3QR68|J3QR68_HUMANHaptoglobin(Fragment)OS=HomosapiensGN=HPPE=1SV=1;sp|P00738|HPT_HUMANHaptoglobinOS=HomosapiensGN=HPPE=1SV=1;tr|H0Y300|H0Y300_HUMANHaptoglobinOS=HomosapiensGN=HPPE=1SV=4;tr|Q6NSB4|Q6NSB4_HUMANHPproteinOS=HomosapiensGN=HPPE=2SV=1;tr|A0A087WU08|A0A08…	tr|A0A0C4DGL8|A0A0C4DGL8_HUMAN Haptoglobin OS=Homo sapiens GN=HP PE=1 SV=1;sp|P00738-2|HPT_HUMAN Isoform 2 of Haptoglobin OS=Homo sapiens GN=HP;tr|J3QR68|J3QR68_HUMAN Haptoglobin (Fragment) OS=Homo sapiens GN=HP PE=1 SV=1;sp|P00738|HPT_HUMAN Haptoglobin OS	798590	345540	181940	175730	10371	0	12038	224080	16	7	6	3	3	1	0	1	3	7	6	3	3	1	0	1	3	38.451	0	17.208	By MS/MS	By MS/MS	By MS/MS	By MS/MS	By matching		By matching	By MS/MS	25.9	21.3	8.6	8.6	2.3	0	2.9	8.9	15173000	6565200	3456900	3339000
tr|A0A024R2G0|A0A024R2G0_HUMANTransporterOS=HomosapiensGN=SLC6A1PE=3SV=1;sp|P30531|SC6A1_HUMANSodium-andchloride-dependentGABAtransporter1OS=HomosapiensGN=SLC6A1PE=1SV=2;tr|B7Z3C5|B7Z3C5_HUMANcDNAFLJ57116,highlysimilartoSodium-andchloride-dependentGABAtransporter1OS=HomosapiensPE=2SV=1;tr|C9J5P8|C9J5P8_HUMANSodium-andchloride-dependentGABAtransporter1(Fragment)OS=HomosapiensGN=SLC6A1PE=1SV=8	tr|A0A024R2G0|A0A024R2G0_HUMAN Transporter OS=Homo sapiens GN=SLC6A1 PE=3 SV=1;sp|P30531|SC6A1_HUMAN Sodium- and chloride-dependent GABA transporter 1 OS=Homo sapiens GN=SLC6A1 PE=1 SV=2	798020	12327000	5165100	6478900	1560200	11715000	1663900	231380	4	6	6	5	7	5	7	7	4	6	6	5	7	5	7	7	4	67.073	0	21.041	By MS/MS	By MS/MS	By MS/MS	By MS/MS	By MS/MS	By MS/MS	By MS/MS	By MS/MS	12.9	15.7	10.9	17.7	10.9	17.7	17.7	8.2	14364000	221890000	92972000	116620000
sp|P02671-2|FIBA_HUMANIsoform2ofFibrinogenalphachainOS=HomosapiensGN=FGA;sp|P02671|FIBA_HUMANFibrinogenalphachainOS=HomosapiensGN=FGAPE=1SV=2;tr|A0A0S2Z3E8|A0A0S2Z3E8_HUMANFibrinogenalphachainisoform2(Fragment)OS=HomosapiensGN=FGAPE=2SV=1;tr|Q3KRA7|Q3KRA7_HUMANFGAprotein(Fragment)OS=HomosapiensGN=FGAPE=2SV=1;tr|Q6NSD8|Q6NSD8_HUMANFGAproteinOS=HomosapiensGN=FGAPE=2SV=1;tr|A0A087WUA0|A0A087WUA0_HUM…	sp|P02671-2|FIBA_HUMAN Isoform 2 of Fibrinogen alpha chain OS=Homo sapiens GN=FGA;sp|P02671|FIBA_HUMAN Fibrinogen alpha chain OS=Homo sapiens GN=FGA PE=1 SV=2;tr|A0A0S2Z3E8|A0A0S2Z3E8_HUMAN Fibrinogen alpha chain isoform 2 (Fragment) OS=Homo sapiens GN=FGA	795220	1992500	476750	610900	65927	70207	25122	18954	10	16	15	11	12	5	3	3	2	16	15	11	12	5	3	3	2	69.756	0	124.71	By MS/MS	By MS/MS	By MS/MS	By MS/MS	By MS/MS	By matching	By MS/MS	By MS/MS	30.4	26.9	19.4	21.3	9.9	5.7	5.7	3.7	26242000	65752000	15733000	20160000
sp|Q2M2I8|AAK1_HUMANAP2-associatedproteinkinase1OS=HomosapiensGN=AAK1PE=1SV=3;tr|D6W5G0|D6W5G0_HUMANAP2associatedkinase1,isoformCRA_aOS=HomosapiensGN=AAK1PE=4SV=1;tr|B7ZLC4|B7ZLC4_HUMANAAK1proteinOS=HomosapiensGN=AAK1PE=2SV=1;sp|Q2M2I8-2|AAK1_HUMANIsoform2ofAP2-associatedproteinkinase1OS=HomosapiensGN=AAK1;tr|E9PG46|E9PG46_HUMANAP2-associatedproteinkinase1OS=HomosapiensGN=AAK1PE=1SV=1;tr|Q9BUD9|Q…	sp|Q2M2I8|AAK1_HUMAN AP2-associated protein kinase 1 OS=Homo sapiens GN=AAK1 PE=1 SV=3;tr|D6W5G0|D6W5G0_HUMAN AP2 associated kinase 1, isoform CRA_a OS=Homo sapiens GN=AAK1 PE=4 SV=1;tr|B7ZLC4|B7ZLC4_HUMAN AAK1 protein OS=Homo sapiens GN=AAK1 PE=2 SV=1;sp|	792460	988750	1388200	1859500	177580	1780200	279740	16274	13	18	14	12	19	9	15	12	2	18	14	12	19	9	15	12	2	103.88	0	75.137	By MS/MS	By MS/MS	By MS/MS	By MS/MS	By MS/MS	By MS/MS	By MS/MS	By matching	40.4	27.8	21.1	40.4	17.1	30.4	24	3.1	30114000	37572000	52751000	70663000
tr|J3KRE2|J3KRE2_HUMANRhoGDP-dissociationinhibitor1OS=HomosapiensGN=ARHGDIAPE=1SV=1;tr|J3KTF8|J3KTF8_HUMANRhoGDP-dissociationinhibitor1(Fragment)OS=HomosapiensGN=ARHGDIAPE=1SV=8;tr|V9HWE8|V9HWE8_HUMANEpididymissecretoryspermbindingproteinLi47eOS=HomosapiensGN=HEL-S-47ePE=2SV=1;sp|P52565|GDIR1_HUMANRhoGDP-dissociationinhibitor1OS=HomosapiensGN=ARHGDIAPE=1SV=3;tr|J3QQX2|J3QQX2_HUMANRhoGDP-dissociat…	tr|J3KRE2|J3KRE2_HUMAN Rho GDP-dissociation inhibitor 1 OS=Homo sapiens GN=ARHGDIA PE=1 SV=1;tr|J3KTF8|J3KTF8_HUMAN Rho GDP-dissociation inhibitor 1 (Fragment) OS=Homo sapiens GN=ARHGDIA PE=1 SV=8;tr|V9HWE8|V9HWE8_HUMAN Epididymis secretory sperm binding p	789650	2535700	2147600	1955000	0	2991500	332850	0	10	4	4	4	4	0	3	3	0	4	4	4	4	0	3	3	0	14.814	0	8.3829	By MS/MS	By MS/MS	By MS/MS	By MS/MS		By MS/MS	By MS/MS		31	31	31	31	0	24.8	24.8	0	4737900	15214000	12886000	11730000
tr|B4E054|B4E054_HUMANcDNAFLJ58444,highlysimilartoVacuolarATPsynthasesubunitH(EC3.6.3.14)OS=HomosapiensPE=2SV=1;tr|A0A024R7X3|A0A024R7X3_HUMANATPase,H+transporting,lysosomal50/57kDa,V1subunitH,isoformCRA_bOS=HomosapiensGN=ATP6V1HPE=4SV=1;sp|Q9UI12-2|VATH_HUMANIsoform2ofV-typeprotonATPasesubunitHOS=HomosapiensGN=ATP6V1H;tr|A0A024R7U9|A0A024R7U9_HUMANATPase,H+transporting,lysosomal50/57kDa,V1subuni…	tr|B4E054|B4E054_HUMAN cDNA FLJ58444, highly similar to Vacuolar ATP synthase subunit H (EC 3.6.3.14) OS=Homo sapiens PE=2 SV=1;tr|A0A024R7X3|A0A024R7X3_HUMAN ATPase, H+ transporting, lysosomal 50/57kDa, V1 subunit H, isoform CRA_b OS=Homo sapiens GN=ATP6V	789470	2689500	1417400	2074700	543980	2815200	863030	478990	11	14	10	9	14	7	11	9	6	2	2	2	2	2	2	2	2	52.711	0	56.761	By MS/MS	By MS/MS	By MS/MS	By MS/MS	By MS/MS	By MS/MS	By MS/MS	By MS/MS	41.1	29.1	25.8	41.1	19.5	31.9	26.9	17.3	18947000	64549000	34017000	49792000
sp|P17987|TCPA_HUMANT-complexprotein1subunitalphaOS=HomosapiensGN=TCP1PE=1SV=1;tr|E7EQR6|E7EQR6_HUMANT-complexprotein1subunitalphaOS=HomosapiensGN=TCP1PE=1SV=1;tr|E7ERF2|E7ERF2_HUMANT-complexprotein1subunitalphaOS=HomosapiensGN=TCP1PE=1SV=1;tr|F5H282|F5H282_HUMANT-complexprotein1subunitalphaOS=HomosapiensGN=TCP1PE=1SV=1;tr|F5GZ03|F5GZ03_HUMANT-complexprotein1subunitalpha(Fragment)OS=HomosapiensGN…	sp|P17987|TCPA_HUMAN T-complex protein 1 subunit alpha OS=Homo sapiens GN=TCP1 PE=1 SV=1;tr|E7EQR6|E7EQR6_HUMAN T-complex protein 1 subunit alpha OS=Homo sapiens GN=TCP1 PE=1 SV=1;tr|E7ERF2|E7ERF2_HUMAN T-complex protein 1 subunit alpha OS=Homo sapiens GN=	789020	1767600	2308500	1928600	681590	1982900	630580	1092800	11	22	16	17	21	12	19	17	17	22	16	17	21	12	19	17	17	60.343	0	86.709	By MS/MS	By MS/MS	By MS/MS	By MS/MS	By MS/MS	By MS/MS	By MS/MS	By MS/MS	47.5	32	35.8	45.5	23.6	37.8	30.8	34.9	24460000	54796000	71564000	59786000
tr|A0A0S2Z4C6|A0A0S2Z4C6_HUMANSerine/threonine-proteinphosphatase(Fragment)OS=HomosapiensGN=PPP3CAPE=2SV=1;sp|Q08209|PP2BA_HUMANSerine/threonine-proteinphosphatase2BcatalyticsubunitalphaisoformOS=HomosapiensGN=PPP3CAPE=1SV=1;tr|A0A0S2Z4B5|A0A0S2Z4B5_HUMANSerine/threonine-proteinphosphatase(Fragment)OS=HomosapiensGN=PPP3CAPE=2SV=1;sp|Q08209-2|PP2BA_HUMANIsoform2ofSerine/threonine-proteinphosphatas…	tr|A0A0S2Z4C6|A0A0S2Z4C6_HUMAN Serine/threonine-protein phosphatase (Fragment) OS=Homo sapiens GN=PPP3CA PE=2 SV=1;sp|Q08209|PP2BA_HUMAN Serine/threonine-protein phosphatase 2B catalytic subunit alpha isoform OS=Homo sapiens GN=PPP3CA PE=1 SV=1;tr|A0A0S2Z4	786990	1458900	862750	1608800	234740	1191600	1409300	2827200	19	15	14	9	16	7	11	13	13	9	9	7	9	5	7	9	9	58.687	0	46.485	By MS/MS	By MS/MS	By MS/MS	By MS/MS	By MS/MS	By MS/MS	By MS/MS	By MS/MS	27.6	27.1	15.5	27.6	14.4	21.9	29.6	29.6	18101000	33555000	19843000	37003000
tr|A3KPC7|A3KPC7_HUMANHistoneH2AOS=HomosapiensGN=HIST1H2AHPE=2SV=1;sp|Q99878|H2A1J_HUMANHistoneH2Atype1-JOS=HomosapiensGN=HIST1H2AJPE=1SV=3;sp|Q96KK5|H2A1H_HUMANHistoneH2Atype1-HOS=HomosapiensGN=HIST1H2AHPE=1SV=3;tr|A0A024RAS2|A0A024RAS2_HUMANHistoneH2AOS=HomosapiensGN=H2AFJPE=3SV=1;sp|Q9BTM1|H2AJ_HUMANHistoneH2A.JOS=HomosapiensGN=H2AFJPE=1SV=1;sp|Q16777|H2A2C_HUMANHistoneH2Atype2-COS=Homosapiens…	tr|A3KPC7|A3KPC7_HUMAN Histone H2A OS=Homo sapiens GN=HIST1H2AH PE=2 SV=1;sp|Q99878|H2A1J_HUMAN Histone H2A type 1-J OS=Homo sapiens GN=HIST1H2AJ PE=1 SV=3;sp|Q96KK5|H2A1H_HUMAN Histone H2A type 1-H OS=Homo sapiens GN=HIST1H2AH PE=1 SV=3;tr|A0A024RAS2|A0A0	786740	484990	1058600	633530	652030	941800	361440	281760	31	3	1	1	2	1	2	1	1	3	1	1	2	1	2	1	1	13.906	0	4.9663	By MS/MS	By MS/MS	By MS/MS	By MS/MS	By MS/MS	By MS/MS	By MS/MS	By MS/MS	30.5	7	7	21.9	7	21.9	7	7	3933700	2424900	5293000	3167600
tr|A0A140VKH4|A0A140VKH4_HUMANCalpain5,isoformCRA_cOS=HomosapiensGN=CAPN5PE=2SV=1;sp|O15484|CAN5_HUMANCalpain-5OS=HomosapiensGN=CAPN5PE=1SV=2;tr|E7EV01|E7EV01_HUMANCalpain-5OS=HomosapiensGN=CAPN5PE=1SV=2;tr|Q59GM2|Q59GM2_HUMANUncharacterizedprotein(Fragment)OS=HomosapiensPE=2SV=1;tr|Q6ZRM8|Q6ZRM8_HUMANcDNAFLJ46245fis,cloneTESTI4020596,highlysimilartoHomosapienscalpain5(CAPN5)OS=HomosapiensPE=2SV=…	tr|A0A140VKH4|A0A140VKH4_HUMAN Calpain 5, isoform CRA_c OS=Homo sapiens GN=CAPN5 PE=2 SV=1;sp|O15484|CAN5_HUMAN Calpain-5 OS=Homo sapiens GN=CAPN5 PE=1 SV=2;tr|E7EV01|E7EV01_HUMAN Calpain-5 OS=Homo sapiens GN=CAPN5 PE=1 SV=2;tr|Q59GM2|Q59GM2_HUMAN Uncharac	785090	1055200	540060	1355300	141340	2515400	361440	99562	8	15	12	7	16	5	20	12	5	15	12	7	16	5	20	12	5	73.168	0	55.121	By MS/MS	By MS/MS	By MS/MS	By MS/MS	By MS/MS	By MS/MS	By MS/MS	By MS/MS	32.8	19.8	12.3	33.4	8	45.5	23.6	8.6	26693000	35877000	18362000	46079000
tr|Q1HBJ4|Q1HBJ4_HUMANMitogen-activatedproteinkinaseOS=HomosapiensGN=MAPK1PE=3SV=1;sp|P28482|MK01_HUMANMitogen-activatedproteinkinase1OS=HomosapiensGN=MAPK1PE=1SV=3;tr|B4DHN0|B4DHN0_HUMANMitogen-activatedproteinkinaseOS=HomosapiensPE=2SV=1;sp|P28482-2|MK01_HUMANIsoform2ofMitogen-activatedproteinkinase1OS=HomosapiensGN=MAPK1;tr|Q499G7|Q499G7_HUMANMitogen-activatedproteinkinaseOS=HomosapiensGN=MAPK…	tr|Q1HBJ4|Q1HBJ4_HUMAN Mitogen-activated protein kinase OS=Homo sapiens GN=MAPK1 PE=3 SV=1;sp|P28482|MK01_HUMAN Mitogen-activated protein kinase 1 OS=Homo sapiens GN=MAPK1 PE=1 SV=3;tr|B4DHN0|B4DHN0_HUMAN Mitogen-activated protein kinase OS=Homo sapiens PE	782600	454420	328730	1227200	28887	952940	846140	1446700	5	10	6	5	9	2	7	8	8	7	5	4	6	2	5	5	5	41.389	0	32.176	By MS/MS	By MS/MS	By MS/MS	By MS/MS	By MS/MS	By MS/MS	By MS/MS	By MS/MS	35.8	21.9	19.4	31.9	6.4	26.4	28.3	27.8	17217000	9997300	7232100	26997000
tr|Q6FIC5|Q6FIC5_HUMANChlorideintracellularchannelproteinOS=HomosapiensGN=CLIC4PE=2SV=1;sp|Q9Y696|CLIC4_HUMANChlorideintracellularchannelprotein4OS=HomosapiensGN=CLIC4PE=1SV=4;tr|B4DWC4|B4DWC4_HUMANChlorideintracellularchannelproteinOS=HomosapiensPE=2SV=1;tr|Q9NVF8|Q9NVF8_HUMANcDNAFLJ10762fis,cloneNT2RP4000008,moderatelysimilartoCHLORINECHANNELPROTEINP64OS=HomosapiensPE=2SV=1;tr|B3KTR3|B3KTR3_HUM…	tr|Q6FIC5|Q6FIC5_HUMAN Chloride intracellular channel protein OS=Homo sapiens GN=CLIC4 PE=2 SV=1;sp|Q9Y696|CLIC4_HUMAN Chloride intracellular channel protein 4 OS=Homo sapiens GN=CLIC4 PE=1 SV=4;tr|B4DWC4|B4DWC4_HUMAN Chloride intracellular channel protein	782410	196420	540510	534600	97240	112990	151890	1135800	5	7	3	3	5	2	1	2	4	7	3	3	5	2	1	2	4	28.772	0	35.824	By MS/MS	By MS/MS	By MS/MS	By MS/MS	By MS/MS	By matching	By MS/MS	By MS/MS	48.6	19.8	19.8	38.3	11.1	4.7	11.1	22.9	11736000	2946200	8107700	8019000
tr|B3KX72|B3KX72_HUMANcDNAFLJ44920fis,cloneBRAMY3011501,highlysimilartoHeterogeneousnuclearribonucleoproteinUOS=HomosapiensPE=2SV=1;tr|B4DLR3|B4DLR3_HUMANcDNAFLJ54020,highlysimilartoHeterogeneousnuclearribonucleoproteinUOS=HomosapiensPE=2SV=1;tr|A0A1W2PPS1|A0A1W2PPS1_HUMANHeterogeneousnuclearribonucleoproteinUOS=HomosapiensGN=HNRNPUPE=1SV=1;sp|Q00839-2|HNRPU_HUMANIsoformShortofHeterogeneousnuclea…	tr|B3KX72|B3KX72_HUMAN cDNA FLJ44920 fis, clone BRAMY3011501, highly similar to Heterogeneous nuclear ribonucleoprotein U OS=Homo sapiens PE=2 SV=1;tr|B4DLR3|B4DLR3_HUMAN cDNA FLJ54020, highly similar to Heterogeneous nuclear ribonucleoprotein U OS=Homo sa	780380	1988300	2003000	1692800	653180	1467700	352870	29143	21	17	15	14	17	12	14	9	3	17	15	14	17	12	14	9	3	83.084	0	52.737	By MS/MS	By MS/MS	By MS/MS	By MS/MS	By MS/MS	By MS/MS	By MS/MS	By matching	24.5	23.1	22.1	30.9	17.1	23.5	14.3	4.3	28094000	71578000	72108000	60941000
tr|A0A087X2E3|A0A087X2E3_HUMANSynapsin-2OS=HomosapiensGN=SYN2PE=1SV=1;tr|Q59GM1|Q59GM1_HUMANSynapsinIIisoformIIbvariant(Fragment)OS=HomosapiensPE=2SV=1;sp|Q92777-2|SYN2_HUMANIsoformIIbofSynapsin-2OS=HomosapiensGN=SYN2;tr|B4DI62|B4DI62_HUMANcDNAFLJ54809,highlysimilartoSynapsin-2OS=HomosapiensPE=2SV=1;tr|A0A087WW91|A0A087WW91_HUMANSynapsin-2(Fragment)OS=HomosapiensGN=SYN2PE=1SV=1	tr|A0A087X2E3|A0A087X2E3_HUMAN Synapsin-2 OS=Homo sapiens GN=SYN2 PE=1 SV=1;tr|Q59GM1|Q59GM1_HUMAN Synapsin II isoform IIb variant (Fragment) OS=Homo sapiens PE=2 SV=1;sp|Q92777-2|SYN2_HUMAN Isoform IIb of Synapsin-2 OS=Homo sapiens GN=SYN2;tr|B4DI62|B4DI6	779630	2305800	1739900	2962300	133040	8910700	2066400	637390	5	11	10	10	12	6	16	15	11	0	0	1	1	0	1	1	0	52.31	0	56.079	By MS/MS	By MS/MS	By MS/MS	By MS/MS	By MS/MS	By MS/MS	By MS/MS	By MS/MS	37.2	30.5	33.9	42.7	15.3	51.7	43.7	28.5	17931000	53034000	40018000	68134000
tr|A0A024RDK2|A0A024RDK2_HUMANAnkyrin2,neuronal,isoformCRA_bOS=HomosapiensGN=ANK2PE=4SV=1;sp|Q01484|ANK2_HUMANAnkyrin-2OS=HomosapiensGN=ANK2PE=1SV=4;tr|I6L894|I6L894_HUMANAnkyrin-2OS=HomosapiensGN=ANK2PE=1SV=1;tr|A0A024RDI4|A0A024RDI4_HUMANAnkyrin2,neuronal,isoformCRA_aOS=HomosapiensGN=ANK2PE=4SV=1;sp|Q01484-5|ANK2_HUMANIsoform4ofAnkyrin-2OS=HomosapiensGN=ANK2;sp|Q01484-2|ANK2_HUMANIsoform2ofAnky…	tr|A0A024RDK2|A0A024RDK2_HUMAN Ankyrin 2, neuronal, isoform CRA_b OS=Homo sapiens GN=ANK2 PE=4 SV=1;sp|Q01484|ANK2_HUMAN Ankyrin-2 OS=Homo sapiens GN=ANK2 PE=1 SV=4;tr|I6L894|I6L894_HUMAN Ankyrin-2 OS=Homo sapiens GN=ANK2 PE=1 SV=1;tr|A0A024RDI4|A0A024RDI4	777090	1628900	1722500	2676700	385540	3179300	368780	85468	39	74	83	72	85	54	85	70	29	64	73	63	74	48	74	62	27	431.35	0	323.31	By MS/MS	By MS/MS	By MS/MS	By MS/MS	By MS/MS	By MS/MS	By MS/MS	By MS/MS	27.5	28.9	25.6	31.4	19.1	31	24.8	10.1	159300000	333920000	353100000	548720000
tr|Q6IAX4|Q6IAX4_HUMANReticulonOS=HomosapiensGN=RTN1PE=2SV=1;tr|A8K3B9|A8K3B9_HUMANReticulonOS=HomosapiensPE=2SV=1;sp|Q16799-3|RTN1_HUMANIsoformRTN1-CofReticulon-1OS=HomosapiensGN=RTN1	tr|Q6IAX4|Q6IAX4_HUMAN Reticulon OS=Homo sapiens GN=RTN1 PE=2 SV=1;tr|A8K3B9|A8K3B9_HUMAN Reticulon OS=Homo sapiens PE=2 SV=1;sp|Q16799-3|RTN1_HUMAN Isoform RTN1-C of Reticulon-1 OS=Homo sapiens GN=RTN1	774730	1594400	1535700	2847400	238560	4856100	254590	196230	3	5	5	5	6	6	5	6	6	2	2	2	2	2	2	2	2	23.561	0.00054377	2.7449	By MS/MS	By MS/MS	By MS/MS	By MS/MS	By MS/MS	By MS/MS	By MS/MS	By MS/MS	26	26	26	27.4	30.3	26	30.3	30.3	7747300	15944000	15357000	28474000
tr|D3DTP7|D3DTP7_HUMANPhospholipidscramblaseOS=HomosapiensGN=hCG_1987383PE=3SV=1	tr|D3DTP7|D3DTP7_HUMAN Phospholipid scramblase OS=Homo sapiens GN=hCG_1987383 PE=3 SV=1	772450	538430	259260	419950	191690	738870	2429400	3914300	1	4	4	2	3	1	3	5	5	0	0	0	0	0	0	0	0	37.705	0	46.499	By MS/MS	By MS/MS	By MS/MS	By MS/MS	By matching	By matching	By MS/MS	By MS/MS	17.1	17.1	8.9	14.3	5.4	14.3	18.6	18.6	9269300	6461100	3111100	5039400
tr|A0A087WUW9|A0A087WUW9_HUMANADP-ribosylationfactor-likeprotein15OS=HomosapiensGN=ARL15PE=1SV=1;sp|Q9NXU5|ARL15_HUMANADP-ribosylationfactor-likeprotein15OS=HomosapiensGN=ARL15PE=1SV=1;tr|A0A0B4J222|A0A0B4J222_HUMANADP-ribosylationfactor-likeprotein15OS=HomosapiensGN=ARL15PE=1SV=1;tr|A8K4C1|A8K4C1_HUMANcDNAFLJ77904,highlysimilartoHomosapiensADP-ribosylationfactor-like15,mRNAOS=HomosapiensPE=2SV=1	tr|A0A087WUW9|A0A087WUW9_HUMAN ADP-ribosylation factor-like protein 15 OS=Homo sapiens GN=ARL15 PE=1 SV=1;sp|Q9NXU5|ARL15_HUMAN ADP-ribosylation factor-like protein 15 OS=Homo sapiens GN=ARL15 PE=1 SV=1;tr|A0A0B4J222|A0A0B4J222_HUMAN ADP-ribosylation facto	771120	1494600	1267200	1533200	11909	2976700	266160	161250	4	6	5	5	7	1	6	5	4	6	5	5	7	1	6	5	4	22.876	0	26.846	By MS/MS	By MS/MS	By MS/MS	By MS/MS	By matching	By MS/MS	By MS/MS	By MS/MS	46.1	33.8	33.8	60.8	8.8	34.3	33.8	23.5	7711200	14946000	12672000	15332000
sp|Q9C040|TRIM2_HUMANTripartitemotif-containingprotein2OS=HomosapiensGN=TRIM2PE=1SV=1;sp|Q9C040-2|TRIM2_HUMANIsoform2ofTripartitemotif-containingprotein2OS=HomosapiensGN=TRIM2;tr|A0A0J9YX34|A0A0J9YX34_HUMANTripartitemotif-containingprotein2OS=HomosapiensGN=TRIM2PE=1SV=1;tr|A0A0J9YY97|A0A0J9YY97_HUMANTripartitemotif-containingprotein2(Fragment)OS=HomosapiensGN=TRIM2PE=1SV=1;tr|C9J084|C9J084_HUMANT…	sp|Q9C040|TRIM2_HUMAN Tripartite motif-containing protein 2 OS=Homo sapiens GN=TRIM2 PE=1 SV=1;sp|Q9C040-2|TRIM2_HUMAN Isoform 2 of Tripartite motif-containing protein 2 OS=Homo sapiens GN=TRIM2;tr|A0A0J9YX34|A0A0J9YX34_HUMAN Tripartite motif-containing pr	770680	174850	529840	1189900	25760	807460	112990	48558	5	19	10	12	18	4	12	9	5	18	9	11	17	3	11	8	4	81.529	0	87.033	By MS/MS	By MS/MS	By MS/MS	By MS/MS	By MS/MS	By MS/MS	By MS/MS	By matching	40.5	18.3	24.9	36.8	6.2	22.7	17.2	8.3	28515000	6469500	19604000	44026000
tr|A0A024R6Y2|A0A024R6Y2_HUMANNucleartransportfactor2,isoformCRA_aOS=HomosapiensGN=NUTF2PE=4SV=1;sp|P61970|NTF2_HUMANNucleartransportfactor2OS=HomosapiensGN=NUTF2PE=1SV=1;tr|H3BRV9|H3BRV9_HUMANNucleartransportfactor2(Fragment)OS=HomosapiensGN=NUTF2PE=1SV=1;tr|B4DEQ2|B4DEQ2_HUMANcDNAFLJ57908,moderatelysimilartoNucleartransportfactor2OS=HomosapiensPE=2SV=1	tr|A0A024R6Y2|A0A024R6Y2_HUMAN Nuclear transport factor 2, isoform CRA_a OS=Homo sapiens GN=NUTF2 PE=4 SV=1;sp|P61970|NTF2_HUMAN Nuclear transport factor 2 OS=Homo sapiens GN=NUTF2 PE=1 SV=1;tr|H3BRV9|H3BRV9_HUMAN Nuclear transport factor 2 (Fragment) OS=H	767030	377430	1546500	1222100	837290	460900	201940	1024400	4	4	2	2	5	3	2	2	2	4	2	2	5	3	2	2	2	14.478	0	11.761	By MS/MS	By MS/MS	By MS/MS	By MS/MS	By MS/MS	By MS/MS	By MS/MS	By MS/MS	45.7	11.8	11.8	63.8	29.9	11.8	11.8	11.8	5369200	2642000	10825000	8554500
sp|Q9P035|HACD3_HUMANVery-long-chain(3R)-3-hydroxyacyl-CoAdehydratase3OS=HomosapiensGN=HACD3PE=1SV=2;tr|H3BS72|H3BS72_HUMANVery-long-chain(3R)-3-hydroxyacyl-CoAdehydrataseOS=HomosapiensGN=HACD3PE=1SV=1;tr|H3BPZ1|H3BPZ1_HUMANVery-long-chain(3R)-3-hydroxyacyl-CoAdehydrataseOS=HomosapiensGN=HACD3PE=1SV=1;sp|Q9P035-2|HACD3_HUMANIsoform2ofVery-long-chain(3R)-3-hydroxyacyl-CoAdehydratase3OS=Homosapiens…	sp|Q9P035|HACD3_HUMAN Very-long-chain (3R)-3-hydroxyacyl-CoA dehydratase 3 OS=Homo sapiens GN=HACD3 PE=1 SV=2;tr|H3BS72|H3BS72_HUMAN Very-long-chain (3R)-3-hydroxyacyl-CoA dehydratase OS=Homo sapiens GN=HACD3 PE=1 SV=1;tr|H3BPZ1|H3BPZ1_HUMAN Very-long-chai	764340	5573700	2214400	1394100	609800	2581500	495100	96512	6	9	11	9	9	3	10	4	1	9	11	9	9	3	10	4	1	43.159	0	25.701	By MS/MS	By MS/MS	By MS/MS	By MS/MS	By MS/MS	By MS/MS	By MS/MS	By matching	24.6	28.2	24.9	24.6	10.2	24.9	12.2	5.8	11465000	83606000	33216000	20911000
sp|P23634-8|AT2B4_HUMANIsoformZDofPlasmamembranecalcium-transportingATPase4OS=HomosapiensGN=ATP2B4;sp|P23634|AT2B4_HUMANPlasmamembranecalcium-transportingATPase4OS=HomosapiensGN=ATP2B4PE=1SV=2;sp|P23634-7|AT2B4_HUMANIsoformZBofPlasmamembranecalcium-transportingATPase4OS=HomosapiensGN=ATP2B4;tr|Q68DH9|Q68DH9_HUMANCalcium-transportingATPaseOS=HomosapiensGN=DKFZp686M088PE=2SV=1;tr|A0A024R968|A0A024R…	sp|P23634-8|AT2B4_HUMAN Isoform ZD of Plasma membrane calcium-transporting ATPase 4 OS=Homo sapiens GN=ATP2B4;sp|P23634|AT2B4_HUMAN Plasma membrane calcium-transporting ATPase 4 OS=Homo sapiens GN=ATP2B4 PE=1 SV=2;sp|P23634-7|AT2B4_HUMAN Isoform ZB of Plas	762680	2674600	2130700	3530500	498430	4103100	568480	153920	8	31	29	28	35	21	33	28	14	1	1	1	1	1	1	1	1	136.58	0	118.28	By MS/MS	By MS/MS	By MS/MS	By MS/MS	By MS/MS	By MS/MS	By MS/MS	By MS/MS	29	27	27.7	33.5	20.9	29.7	27.6	12	43473000	152450000	121450000	201240000
tr|X5DQN2|X5DQN2_HUMANAldehydedehydrogenase5familymemberA1isoformB(Fragment)OS=HomosapiensGN=ALDH5A1PE=2SV=1;sp|P51649|SSDH_HUMANSuccinate-semialdehydedehydrogenase,mitochondrialOS=HomosapiensGN=ALDH5A1PE=1SV=2;tr|X5D299|X5D299_HUMANAldehydedehydrogenase5familymemberA1isoformA(Fragment)OS=HomosapiensGN=ALDH5A1PE=2SV=1;sp|P51649-2|SSDH_HUMANIsoform2ofSuccinate-semialdehydedehydrogenase,mitochondri…	tr|X5DQN2|X5DQN2_HUMAN Aldehyde dehydrogenase 5 family member A1 isoform B (Fragment) OS=Homo sapiens GN=ALDH5A1 PE=2 SV=1;sp|P51649|SSDH_HUMAN Succinate-semialdehyde dehydrogenase, mitochondrial OS=Homo sapiens GN=ALDH5A1 PE=1 SV=2;tr|X5D299|X5D299_HUMAN	762330	1575200	1116400	1647900	373760	1720100	1080700	944310	10	14	10	11	13	7	9	11	10	14	10	11	13	7	9	11	10	57.214	0	69.567	By MS/MS	By MS/MS	By MS/MS	By MS/MS	By MS/MS	By MS/MS	By MS/MS	By MS/MS	37.8	23.4	23.4	35.5	16.4	20.4	27.7	22.4	19820000	40955000	29027000	42844000
tr|A0A024R611|A0A024R611_HUMANCoroninOS=HomosapiensGN=CORO1APE=3SV=1;sp|P31146|COR1A_HUMANCoronin-1AOS=HomosapiensGN=CORO1APE=1SV=4;tr|H3BRY3|H3BRY3_HUMANCoroninOS=HomosapiensGN=CORO1APE=1SV=1;tr|Q59G88|Q59G88_HUMANCoronin(Fragment)OS=HomosapiensPE=3SV=1;tr|H3BTU6|H3BTU6_HUMANCoronin(Fragment)OS=HomosapiensGN=CORO1APE=1SV=1;tr|H3BRJ0|H3BRJ0_HUMANCoronin(Fragment)OS=HomosapiensGN=CORO1APE=1SV=1;tr…	tr|A0A024R611|A0A024R611_HUMAN Coronin OS=Homo sapiens GN=CORO1A PE=3 SV=1;sp|P31146|COR1A_HUMAN Coronin-1A OS=Homo sapiens GN=CORO1A PE=1 SV=4;tr|H3BRY3|H3BRY3_HUMAN Coronin OS=Homo sapiens GN=CORO1A PE=1 SV=1;tr|Q59G88|Q59G88_HUMAN Coronin (Fragment) OS=	758320	4320400	4739300	2863100	1058500	7685800	1932600	1090000	11	11	13	14	12	14	14	12	10	11	13	14	12	14	14	12	10	51.026	0	33.012	By MS/MS	By MS/MS	By MS/MS	By MS/MS	By MS/MS	By MS/MS	By MS/MS	By MS/MS	26.2	31.9	32.1	26.2	32.1	32.1	31.2	27.1	14408000	82087000	90047000	54399000
sp|Q9H9H5|MA6D1_HUMANMAP6domain-containingprotein1OS=HomosapiensGN=MAP6D1PE=1SV=1;tr|C9JPF8|C9JPF8_HUMANMAP6domaincontaining1,isoformCRA_bOS=HomosapiensGN=MAP6D1PE=1SV=1;tr|H7BZQ6|H7BZQ6_HUMANMAP6domain-containingprotein1(Fragment)OS=HomosapiensGN=MAP6D1PE=1SV=1;tr|A0A1W2PP11|A0A1W2PP11_HUMANUncharacterizedproteinOS=HomosapiensPE=4SV=1	sp|Q9H9H5|MA6D1_HUMAN MAP6 domain-containing protein 1 OS=Homo sapiens GN=MAP6D1 PE=1 SV=1;tr|C9JPF8|C9JPF8_HUMAN MAP6 domain containing 1, isoform CRA_b OS=Homo sapiens GN=MAP6D1 PE=1 SV=1;tr|H7BZQ6|H7BZQ6_HUMAN MAP6 domain-containing protein 1 (Fragment)	757490	297730	179100	547820	49311	92455	65400	164970	4	5	4	2	5	1	1	1	1	5	4	2	5	1	1	1	1	21.004	0	18.228	By MS/MS	By matching	By MS/MS	By MS/MS	By MS/MS	By MS/MS	By matching	By MS/MS	49.7	39.2	13.6	49.7	7	7	7	7	8332400	3275100	1970100	6026000
tr|H0YFA4|H0YFA4_HUMANCysteine-richprotein2(Fragment)OS=HomosapiensGN=CRIP2PE=1SV=1;tr|Q53FN1|Q53FN1_HUMANCysteine-richprotein2variant(Fragment)OS=HomosapiensPE=2SV=1;sp|P52943|CRIP2_HUMANCysteine-richprotein2OS=HomosapiensGN=CRIP2PE=1SV=1;sp|P52943-2|CRIP2_HUMANIsoform2ofCysteine-richprotein2OS=HomosapiensGN=CRIP2	tr|H0YFA4|H0YFA4_HUMAN Cysteine-rich protein 2 (Fragment) OS=Homo sapiens GN=CRIP2 PE=1 SV=1;tr|Q53FN1|Q53FN1_HUMAN Cysteine-rich protein 2 variant (Fragment) OS=Homo sapiens PE=2 SV=1;sp|P52943|CRIP2_HUMAN Cysteine-rich protein 2 OS=Homo sapiens GN=CRIP2	756670	521540	479930	1156500	310950	2648900	677190	2210900	4	2	2	1	2	1	2	2	2	2	2	1	2	1	2	2	2	20.6	0	23.177	By MS/MS	By MS/MS	By MS/MS	By MS/MS	By MS/MS	By MS/MS	By MS/MS	By MS/MS	25	25	8.3	25	8.3	25	25	25	6810100	4693900	4319400	10408000
tr|A0A024R7I7|A0A024R7I7_HUMANH.sapiensras-relatedHrab3AproteinOS=HomosapiensGN=RAB3APE=2SV=1;sp|P20336|RAB3A_HUMANRas-relatedproteinRab-3AOS=HomosapiensGN=RAB3APE=1SV=1;tr|B4DE50|B4DE50_HUMANcDNAFLJ59582,highlysimilartoRas-relatedproteinRab-3AOS=HomosapiensPE=2SV=1;tr|S4R3Q3|S4R3Q3_HUMANRas-relatedproteinRab-3AOS=HomosapiensGN=RAB3APE=1SV=1;tr|M0R257|M0R257_HUMANRas-relatedproteinRab-3A(Fragment…	tr|A0A024R7I7|A0A024R7I7_HUMAN H.sapiens ras-related Hrab3A protein OS=Homo sapiens GN=RAB3A PE=2 SV=1;sp|P20336|RAB3A_HUMAN Ras-related protein Rab-3A OS=Homo sapiens GN=RAB3A PE=1 SV=1;tr|B4DE50|B4DE50_HUMAN cDNA FLJ59582, highly similar to Ras-related p	755550	15328000	6471400	7026700	3021800	11949000	1117100	174920	5	6	7	7	7	6	9	6	2	3	5	5	4	4	6	3	1	24.984	0	68.475	By MS/MS	By MS/MS	By MS/MS	By MS/MS	By MS/MS	By MS/MS	By MS/MS	By MS/MS	37.3	40	40	42.7	32.7	51.4	35.5	10.9	9822100	199270000	84128000	91347000
sp|Q3ZCM7|TBB8_HUMANTubulinbeta-8chainOS=HomosapiensGN=TUBB8PE=1SV=2;tr|A0A075B736|A0A075B736_HUMANTubulinbetachainOS=HomosapiensGN=TUBB8PE=1SV=1;tr|Q5SQY0|Q5SQY0_HUMANTubulinbetachainOS=HomosapiensGN=TUBB8PE=1SV=1;tr|A0A183YE00|A0A183YE00_HUMANTubulinbetachainOS=HomosapiensGN=TUB4qPE=2SV=1	sp|Q3ZCM7|TBB8_HUMAN Tubulin beta-8 chain OS=Homo sapiens GN=TUBB8 PE=1 SV=2;tr|A0A075B736|A0A075B736_HUMAN Tubulin beta chain OS=Homo sapiens GN=TUBB8 PE=1 SV=1;tr|Q5SQY0|Q5SQY0_HUMAN Tubulin beta chain OS=Homo sapiens GN=TUBB8 PE=1 SV=1;tr|A0A183YE00|A0A	744270	406580	0	679980	50081	2121800	190270	921320	4	11	10	9	10	9	11	11	10	2	1	0	1	1	2	2	1	49.775	0	11.926	By MS/MS	By MS/MS	By matching	By MS/MS	By MS/MS	By MS/MS	By MS/MS	By MS/MS	28.2	24.3	17.1	24.3	17.8	24.5	24.5	24.3	14885000	8131700	0	13600000
sp|Q9UEY8-2|ADDG_HUMANIsoform1ofGamma-adducinOS=HomosapiensGN=ADD3;tr|Q5VU08|Q5VU08_HUMANAdducin3(Gamma),isoformCRA_aOS=HomosapiensGN=ADD3PE=2SV=1;sp|Q9UEY8|ADDG_HUMANGamma-adducinOS=HomosapiensGN=ADD3PE=1SV=1;tr|Q59EK1|Q59EK1_HUMANAdducin3isoformavariant(Fragment)OS=HomosapiensPE=2SV=1;tr|Q53FL4|Q53FL4_HUMANAdducin3isoformavariant(Fragment)OS=HomosapiensPE=2SV=1	sp|Q9UEY8-2|ADDG_HUMAN Isoform 1 of Gamma-adducin OS=Homo sapiens GN=ADD3;tr|Q5VU08|Q5VU08_HUMAN Adducin 3 (Gamma), isoform CRA_a OS=Homo sapiens GN=ADD3 PE=2 SV=1;sp|Q9UEY8|ADDG_HUMAN Gamma-adducin OS=Homo sapiens GN=ADD3 PE=1 SV=1;tr|Q59EK1|Q59EK1_HUMAN	740220	1461100	1209700	1459900	235990	1437700	51498	6427.8	5	11	13	12	11	5	10	3	1	11	13	12	11	5	10	3	1	75.67	0	55.263	By MS/MS	By MS/MS	By MS/MS	By MS/MS	By MS/MS	By MS/MS	By MS/MS	By matching	22	25.7	25.7	22	8.2	20.8	5.9	2.1	20726000	40912000	33871000	40879000
tr|B4DEB8|B4DEB8_HUMANTetraspaninOS=HomosapiensPE=2SV=1;tr|Q7Z3Z6|Q7Z3Z6_HUMANTetraspaninOS=HomosapiensGN=TM4SF2PE=2SV=1;sp|P41732|TSN7_HUMANTetraspanin-7OS=HomosapiensGN=TSPAN7PE=1SV=2;tr|B4DDG0|B4DDG0_HUMANTetraspaninOS=HomosapiensGN=TSPAN7PE=2SV=1;tr|B4DEA5|B4DEA5_HUMANTetraspaninOS=HomosapiensPE=2SV=1;tr|B4E171|B4E171_HUMANTetraspaninOS=HomosapiensPE=2SV=1;tr|Q7Z2D9|Q7Z2D9_HUMANTransmembrane4…	tr|B4DEB8|B4DEB8_HUMAN Tetraspanin OS=Homo sapiens PE=2 SV=1;tr|Q7Z3Z6|Q7Z3Z6_HUMAN Tetraspanin OS=Homo sapiens GN=TM4SF2 PE=2 SV=1;sp|P41732|TSN7_HUMAN Tetraspanin-7 OS=Homo sapiens GN=TSPAN7 PE=1 SV=2;tr|B4DDG0|B4DDG0_HUMAN Tetraspanin OS=Homo sapiens GN	739700	5875300	2207900	5819700	823880	10044000	1861800	463280	7	3	3	3	3	2	3	3	3	3	3	3	3	2	3	3	3	24.475	0	157.72	By MS/MS	By MS/MS	By MS/MS	By MS/MS	By MS/MS	By MS/MS	By MS/MS	By MS/MS	15.2	15.2	15.2	15.2	11.2	15.2	15.2	15.2	4438200	35252000	13247000	34918000
tr|B7Z6P1|B7Z6P1_HUMANcDNAFLJ53662,highlysimilartoActin,alphaskeletalmuscleOS=HomosapiensPE=2SV=1;sp|P68133|ACTS_HUMANActin,alphaskeletalmuscleOS=HomosapiensGN=ACTA1PE=1SV=1;sp|P68032|ACTC_HUMANActin,alphacardiacmuscle1OS=HomosapiensGN=ACTC1PE=1SV=1;tr|A8K3K1|A8K3K1_HUMANcDNAFLJ78096,highlysimilartoHomosapiensactin,alpha,cardiacmuscle(ACTC),mRNAOS=HomosapiensPE=2SV=1;tr|D2JYH4|D2JYH4_HUMANActin,a…	tr|B7Z6P1|B7Z6P1_HUMAN cDNA FLJ53662, highly similar to Actin, alpha skeletal muscle OS=Homo sapiens PE=2 SV=1;sp|P68133|ACTS_HUMAN Actin, alpha skeletal muscle OS=Homo sapiens GN=ACTA1 PE=1 SV=1;sp|P68032|ACTC_HUMAN Actin, alpha cardiac muscle 1 OS=Homo s	733470	391280	138270	685050	81490	927070	430740	492230	22	14	13	13	14	12	12	15	12	1	1	1	1	2	1	3	2	38.579	0	6.2882	By MS/MS	By MS/MS	By MS/MS	By MS/MS	By MS/MS	By MS/MS	By MS/MS	By MS/MS	35.6	32.4	35	35.6	29.4	31.8	38.8	34.1	13936000	7434300	2627200	13016000
tr|A0A024QZ30|A0A024QZ30_HUMANSuccinatedehydrogenase[ubiquinone]flavoproteinsubunit,mitochondrialOS=HomosapiensGN=SDHAPE=3SV=1;sp|P31040|SDHA_HUMANSuccinatedehydrogenase[ubiquinone]flavoproteinsubunit,mitochondrialOS=HomosapiensGN=SDHAPE=1SV=2;sp|P31040-2|SDHA_HUMANIsoform2ofSuccinatedehydrogenase[ubiquinone]flavoproteinsubunit,mitochondrialOS=HomosapiensGN=SDHA;tr|D6RFM5|D6RFM5_HUMANSuccinatedeh…	tr|A0A024QZ30|A0A024QZ30_HUMAN Succinate dehydrogenase [ubiquinone] flavoprotein subunit, mitochondrial OS=Homo sapiens GN=SDHA PE=3 SV=1;sp|P31040|SDHA_HUMAN Succinate dehydrogenase [ubiquinone] flavoprotein subunit, mitochondrial OS=Homo sapiens GN=SDHA	732920	3155700	3241000	3048700	1213000	4147700	640120	192300	14	16	18	18	19	17	21	16	8	16	18	18	19	17	21	16	8	72.691	0	100.25	By MS/MS	By MS/MS	By MS/MS	By MS/MS	By MS/MS	By MS/MS	By MS/MS	By MS/MS	31.5	35.1	34.2	39.9	27.7	44.1	35.1	14.3	22721000	97827000	100470000	94511000
sp|O43426-2|SYNJ1_HUMANIsoform2ofSynaptojanin-1OS=HomosapiensGN=SYNJ1;tr|C9JFZ1|C9JFZ1_HUMANSynaptojanin-1OS=HomosapiensGN=SYNJ1PE=1SV=1;sp|O43426-4|SYNJ1_HUMANIsoform3ofSynaptojanin-1OS=HomosapiensGN=SYNJ1;sp|O43426|SYNJ1_HUMANSynaptojanin-1OS=HomosapiensGN=SYNJ1PE=1SV=2;tr|J3KQV8|J3KQV8_HUMANSynaptojanin-1OS=HomosapiensGN=SYNJ1PE=1SV=1;tr|J3KPK1|J3KPK1_HUMANSynaptojanin-1OS=HomosapiensGN=SYNJ1P…	sp|O43426-2|SYNJ1_HUMAN Isoform 2 of Synaptojanin-1 OS=Homo sapiens GN=SYNJ1;tr|C9JFZ1|C9JFZ1_HUMAN Synaptojanin-1 OS=Homo sapiens GN=SYNJ1 PE=1 SV=1;sp|O43426-4|SYNJ1_HUMAN Isoform 3 of Synaptojanin-1 OS=Homo sapiens GN=SYNJ1;sp|O43426|SYNJ1_HUMAN Synapto	730830	1941100	2178100	2444600	502700	2687300	235000	121230	17	37	35	34	39	27	35	23	15	36	34	33	38	27	35	23	15	144.86	0	217.28	By MS/MS	By MS/MS	By MS/MS	By MS/MS	By MS/MS	By MS/MS	By MS/MS	By MS/MS	35.5	33.4	32.6	36	23.4	34.6	23	13.4	51158000	135870000	152470000	171120000
tr|Q5JQ44|Q5JQ44_HUMANUncharacterizedproteinDKFZp547A0616(Fragment)OS=HomosapiensGN=DKFZp547A0616PE=2SV=1;sp|P61225|RAP2B_HUMANRas-relatedproteinRap-2bOS=HomosapiensGN=RAP2BPE=1SV=1	tr|Q5JQ44|Q5JQ44_HUMAN Uncharacterized protein DKFZp547A0616 (Fragment) OS=Homo sapiens GN=DKFZp547A0616 PE=2 SV=1;sp|P61225|RAP2B_HUMAN Ras-related protein Rap-2b OS=Homo sapiens GN=RAP2B PE=1 SV=1	730500	2999500	1420900	2458400	343720	5121100	375280	527880	2	9	11	10	9	7	13	9	8	6	7	6	6	3	8	5	4	20.294	0	43.599	By MS/MS	By MS/MS	By MS/MS	By MS/MS	By MS/MS	By MS/MS	By MS/MS	By MS/MS	50.3	64.6	56.4	50.3	39.8	77.9	55.2	48.6	8035500	32995000	15630000	27042000
sp|Q14204|DYHC1_HUMANCytoplasmicdynein1heavychain1OS=HomosapiensGN=DYNC1H1PE=1SV=5;tr|Q6P2H7|Q6P2H7_HUMANDYNC1H1proteinOS=HomosapiensGN=DYNC1H1PE=2SV=1;tr|H0YJ21|H0YJ21_HUMANCytoplasmicdynein1heavychain1(Fragment)OS=HomosapiensGN=DYNC1H1PE=1SV=1;tr|B4DSR6|B4DSR6_HUMANcDNAFLJ52684,highlysimilartoDyneinheavychain,cytosolicOS=HomosapiensPE=2SV=1;tr|Q9NRC3|Q9NRC3_HUMANCytoplasmicdyneinheavychain(Frag…	sp|Q14204|DYHC1_HUMAN Cytoplasmic dynein 1 heavy chain 1 OS=Homo sapiens GN=DYNC1H1 PE=1 SV=5	730030	632080	797150	1159500	163670	814250	377690	444630	6	114	81	79	107	52	75	72	62	114	81	79	107	52	75	72	62	532.4	0	323.31	By MS/MS	By MS/MS	By MS/MS	By MS/MS	By MS/MS	By MS/MS	By MS/MS	By MS/MS	30.3	20.3	19.3	28.1	11.7	18.6	16.8	14.4	187620000	162450000	204870000	297980000
sp|P22695|QCR2_HUMANCytochromeb-c1complexsubunit2,mitochondrialOS=HomosapiensGN=UQCRC2PE=1SV=3;tr|H3BRG4|H3BRG4_HUMANCytochromeb-c1complexsubunit2,mitochondrialOS=HomosapiensGN=UQCRC2PE=1SV=1;tr|H3BSJ9|H3BSJ9_HUMANCytochromeb-c1complexsubunit2,mitochondrialOS=HomosapiensGN=UQCRC2PE=1SV=1;tr|H3BP04|H3BP04_HUMANCytochromeb-c1complexsubunit2,mitochondrial(Fragment)OS=HomosapiensGN=UQCRC2PE=1SV=1;tr|…	sp|P22695|QCR2_HUMAN Cytochrome b-c1 complex subunit 2, mitochondrial OS=Homo sapiens GN=UQCRC2 PE=1 SV=3;tr|H3BRG4|H3BRG4_HUMAN Cytochrome b-c1 complex subunit 2, mitochondrial OS=Homo sapiens GN=UQCRC2 PE=1 SV=1;tr|H3BSJ9|H3BSJ9_HUMAN Cytochrome b-c1 com	725920	963580	1562000	2798400	511580	2586200	1610000	2340700	7	10	9	7	11	5	12	12	11	10	9	7	11	5	12	12	11	48.442	0	72.575	By MS/MS	By MS/MS	By MS/MS	By MS/MS	By MS/MS	By MS/MS	By MS/MS	By MS/MS	31.6	31.6	23.2	35.5	17	38	35.5	27.2	13792000	18308000	29677000	53170000
sp|P61224-2|RAP1B_HUMANIsoform2ofRas-relatedproteinRap-1bOS=HomosapiensGN=RAP1B;sp|P61224-3|RAP1B_HUMANIsoform3ofRas-relatedproteinRap-1bOS=HomosapiensGN=RAP1B;tr|A0A024RB87|A0A024RB87_HUMANRAP1B,memberofRASoncogenefamily,isoformCRA_aOS=HomosapiensGN=RAP1BPE=4SV=1;sp|P61224|RAP1B_HUMANRas-relatedproteinRap-1bOS=HomosapiensGN=RAP1BPE=1SV=1;tr|A0A0J9YXB3|A0A0J9YXB3_HUMANRas-relatedproteinRap-1b-lik…	sp|P61224-2|RAP1B_HUMAN Isoform 2 of Ras-related protein Rap-1b OS=Homo sapiens GN=RAP1B;sp|P61224-3|RAP1B_HUMAN Isoform 3 of Ras-related protein Rap-1b OS=Homo sapiens GN=RAP1B;tr|A0A024RB87|A0A024RB87_HUMAN RAP1B, member of RAS oncogene family, isoform C	715690	739920	1171400	1182500	970130	1078200	955020	4159900	28	6	5	5	6	5	5	7	6	1	1	1	1	1	1	1	1	15.356	0	51.829	By MS/MS	By MS/MS	By MS/MS	By MS/MS	By MS/MS	By MS/MS	By MS/MS	By MS/MS	46	44.5	44.5	46	44.5	43.8	48.9	43.8	5725500	5919400	9371200	9460200
sp|Q9NQE9|HINT3_HUMANHistidinetriadnucleotide-bindingprotein3OS=HomosapiensGN=HINT3PE=1SV=1	sp|Q9NQE9|HINT3_HUMAN Histidine triad nucleotide-binding protein 3 OS=Homo sapiens GN=HINT3 PE=1 SV=1	704700	137070	640090	410880	75526	81944	226740	651310	1	5	2	4	4	2	1	3	3	5	2	4	4	2	1	3	3	20.361	0	14.216	By MS/MS	By matching	By MS/MS	By MS/MS	By MS/MS	By matching	By MS/MS	By MS/MS	37.9	13.7	35.2	29.7	11	5.5	19.2	19.2	6342300	1233600	5760800	3697900
tr|Q6FGH9|Q6FGH9_HUMANDNCL1proteinOS=HomosapiensGN=DNCL1PE=2SV=1;sp|P63167|DYL1_HUMANDyneinlightchain1,cytoplasmicOS=HomosapiensGN=DYNLL1PE=1SV=1;tr|F8VXL2|F8VXL2_HUMANDyneinlightchain1,cytoplasmicOS=HomosapiensGN=DYNLL1PE=1SV=1;tr|F8VRV5|F8VRV5_HUMANDyneinlightchain1,cytoplasmicOS=HomosapiensGN=DYNLL1PE=1SV=1;tr|F8VXI7|F8VXI7_HUMANDyneinlightchain1,cytoplasmic(Fragment)OS=HomosapiensGN=DYNLL1PE=…	tr|Q6FGH9|Q6FGH9_HUMAN DNCL1 protein OS=Homo sapiens GN=DNCL1 PE=2 SV=1;sp|P63167|DYL1_HUMAN Dynein light chain 1, cytoplasmic OS=Homo sapiens GN=DYNLL1 PE=1 SV=1;tr|F8VXL2|F8VXL2_HUMAN Dynein light chain 1, cytoplasmic OS=Homo sapiens GN=DYNLL1 PE=1 SV=1;	703600	237150	666400	1093800	0	0	0	0	5	6	3	4	5	1	2	2	2	3	1	2	3	0	0	0	0	10.366	0	13.392	By MS/MS	By MS/MS	By MS/MS	By MS/MS	By matching	By matching	By matching	By matching	65.2	49.4	62.9	52.8	12.4	24.7	24.7	24.7	3518000	1185800	3332000	5468900
tr|A0A140VKD5|A0A140VKD5_HUMANTestistissuesperm-bindingproteinLi52eOS=HomosapiensPE=2SV=1;sp|Q8NCB2|CAMKV_HUMANCaMkinase-likevesicle-associatedproteinOS=HomosapiensGN=CAMKVPE=2SV=2;tr|B2RDF9|B2RDF9_HUMANcDNA,FLJ96591OS=HomosapiensPE=2SV=1;sp|Q8NCB2-2|CAMKV_HUMANIsoform2ofCaMkinase-likevesicle-associatedproteinOS=HomosapiensGN=CAMKV;tr|C9J9E2|C9J9E2_HUMANCaMkinase-likevesicle-associatedproteinOS=H…	tr|A0A140VKD5|A0A140VKD5_HUMAN Testis tissue sperm-binding protein Li 52e OS=Homo sapiens PE=2 SV=1;sp|Q8NCB2|CAMKV_HUMAN CaM kinase-like vesicle-associated protein OS=Homo sapiens GN=CAMKV PE=2 SV=2;tr|B2RDF9|B2RDF9_HUMAN cDNA, FLJ96591 OS=Homo sapiens PE	703190	617580	647160	1393000	156520	2602800	580260	624700	10	14	11	11	15	7	17	14	9	0	0	0	0	0	1	1	1	54.353	0	44.54	By MS/MS	By MS/MS	By MS/MS	By MS/MS	By MS/MS	By MS/MS	By MS/MS	By MS/MS	32.1	26.7	27.5	35.5	15.6	43.7	39.5	27.9	16173000	14204000	14885000	32038000
tr|A0A024R3B9|A0A024R3B9_HUMANAlpha-crystallinBchainOS=HomosapiensGN=CRYABPE=1SV=1;tr|A0A140G961|A0A140G961_HUMANAlpha-crystallinBchain(Fragment)OS=HomosapiensGN=CRYABPE=2SV=1;tr|E9PR44|E9PR44_HUMANAlpha-crystallinBchain(Fragment)OS=HomosapiensGN=CRYABPE=1SV=1;tr|V9HW27|V9HW27_HUMANAlpha-crystallinBchainOS=HomosapiensGN=HEL-S-101PE=1SV=1;tr|C3VMY8|C3VMY8_HUMANAlphaBcrystallinOS=HomosapiensGN=CRYA…	tr|A0A024R3B9|A0A024R3B9_HUMAN Alpha-crystallin B chain OS=Homo sapiens GN=CRYAB PE=1 SV=1;tr|A0A140G961|A0A140G961_HUMAN Alpha-crystallin B chain (Fragment) OS=Homo sapiens GN=CRYAB PE=2 SV=1;tr|E9PR44|E9PR44_HUMAN Alpha-crystallin B chain (Fragment) OS=H	701310	126630	923970	539890	86774	403260	150100	209500	11	6	2	3	4	2	2	2	2	6	2	3	4	2	2	2	2	12.253	0	17.201	By MS/MS	By matching	By MS/MS	By MS/MS	By MS/MS	By matching	By MS/MS	By MS/MS	65.7	17.6	26.9	56.5	17.6	17.6	17.6	17.6	4909200	886400	6467800	3779300
tr|A4QPA9|A4QPA9_HUMANMitogen-activatedproteinkinasekinase1OS=HomosapiensGN=MAP2K1PE=2SV=1;sp|Q02750|MP2K1_HUMANDualspecificitymitogen-activatedproteinkinasekinase1OS=HomosapiensGN=MAP2K1PE=1SV=2;tr|B4DFY5|B4DFY5_HUMANMitogen-activatedproteinkinasekinase1,isoformCRA_dOS=HomosapiensGN=MAP2K1PE=2SV=1;sp|Q02750-2|MP2K1_HUMANIsoform2ofDualspecificitymitogen-activatedproteinkinasekinase1OS=Homosapiens…	tr|A4QPA9|A4QPA9_HUMAN Mitogen-activated protein kinase kinase 1 OS=Homo sapiens GN=MAP2K1 PE=2 SV=1;sp|Q02750|MP2K1_HUMAN Dual specificity mitogen-activated protein kinase kinase 1 OS=Homo sapiens GN=MAP2K1 PE=1 SV=2;tr|B4DFY5|B4DFY5_HUMAN Mitogen-activat	698510	694380	668670	1516100	142820	1028100	709930	797960	7	11	7	7	10	6	10	8	6	8	5	5	8	4	8	6	5	43.439	0	39.478	By MS/MS	By MS/MS	By MS/MS	By MS/MS	By matching	By MS/MS	By MS/MS	By MS/MS	31.3	16	16	29	13	28.8	19.1	19.1	13272000	13193000	12705000	28806000
tr|B5MCD7|B5MCD7_HUMANSynaptogyrin-1OS=HomosapiensGN=SYNGR1PE=1SV=1;sp|O43759-2|SNG1_HUMANIsoform1BofSynaptogyrin-1OS=HomosapiensGN=SYNGR1;sp|O43759|SNG1_HUMANSynaptogyrin-1OS=HomosapiensGN=SYNGR1PE=1SV=2;tr|A2A283|A2A283_HUMANSynaptogyrin-1OS=HomosapiensGN=SYNGR1PE=1SV=1;tr|F8WCE4|F8WCE4_HUMANSynaptogyrin-1OS=HomosapiensGN=SYNGR1PE=1SV=1;sp|O43759-3|SNG1_HUMANIsoform1CofSynaptogyrin-1OS=Homosapi…	tr|B5MCD7|B5MCD7_HUMAN Synaptogyrin-1 OS=Homo sapiens GN=SYNGR1 PE=1 SV=1;sp|O43759-2|SNG1_HUMAN Isoform 1B of Synaptogyrin-1 OS=Homo sapiens GN=SYNGR1;sp|O43759|SNG1_HUMAN Synaptogyrin-1 OS=Homo sapiens GN=SYNGR1 PE=1 SV=2;tr|A2A283|A2A283_HUMAN Synaptogy	685190	16653000	8384300	5896200	1717100	12899000	938750	63691	7	3	4	2	3	2	3	2	2	3	4	2	3	2	3	2	2	18.465	0	8.1227	By MS/MS	By MS/MS	By MS/MS	By MS/MS	By MS/MS	By MS/MS	By MS/MS	By MS/MS	18.3	24.3	14.2	18.3	14.2	18.3	11.2	11.2	4111200	99915000	50306000	35377000
tr|K7ERI7|K7ERI7_HUMAN60SribosomalproteinL22OS=HomosapiensGN=RPL22PE=1SV=1;tr|Q7Z4W8|Q7Z4W8_HUMANHeparin-bindingproteinHBp15OS=HomosapiensPE=2SV=1;sp|P35268|RL22_HUMAN60SribosomalproteinL22OS=HomosapiensGN=RPL22PE=1SV=2;tr|K7EP65|K7EP65_HUMAN60SribosomalproteinL22(Fragment)OS=HomosapiensGN=RPL22PE=1SV=1;tr|K7EKS7|K7EKS7_HUMAN60SribosomalproteinL22OS=HomosapiensGN=RPL22PE=1SV=1;tr|K7ELC4|K7ELC4_HU…	tr|K7ERI7|K7ERI7_HUMAN 60S ribosomal protein L22 OS=Homo sapiens GN=RPL22 PE=1 SV=1;tr|Q7Z4W8|Q7Z4W8_HUMAN Heparin-binding protein HBp15 OS=Homo sapiens PE=2 SV=1;sp|P35268|RL22_HUMAN 60S ribosomal protein L22 OS=Homo sapiens GN=RPL22 PE=1 SV=2;tr|K7EP65|K	683420	3092100	2602900	1172600	847430	2107400	170690	112350	8	2	3	3	2	3	2	1	1	2	3	3	2	3	2	1	1	11.168	0	8.4804	By MS/MS	By MS/MS	By MS/MS	By MS/MS	By MS/MS	By MS/MS	By MS/MS	By MS/MS	26.3	42.1	42.1	26.3	42.1	26.3	13.7	13.7	2733700	12368000	10412000	4690400
tr|Q6IRT1|Q6IRT1_HUMANS-(hydroxymethyl)glutathionedehydrogenaseOS=HomosapiensGN=ADH5PE=2SV=2;tr|Q6FI45|Q6FI45_HUMANS-(hydroxymethyl)glutathionedehydrogenaseOS=HomosapiensGN=ADH5PE=2SV=1;sp|P11766|ADHX_HUMANAlcoholdehydrogenaseclass-3OS=HomosapiensGN=ADH5PE=1SV=4;tr|Q5U043|Q5U043_HUMANS-(hydroxymethyl)glutathionedehydrogenaseOS=HomosapiensPE=2SV=1;tr|H0YAG8|H0YAG8_HUMANAlcoholdehydrogenaseclass-3(…	tr|Q6IRT1|Q6IRT1_HUMAN S-(hydroxymethyl)glutathione dehydrogenase OS=Homo sapiens GN=ADH5 PE=2 SV=2;tr|Q6FI45|Q6FI45_HUMAN S-(hydroxymethyl)glutathione dehydrogenase OS=Homo sapiens GN=ADH5 PE=2 SV=1;sp|P11766|ADHX_HUMAN Alcohol dehydrogenase class-3 OS=Ho	683410	168040	166080	950990	15737	630360	195570	47884	9	11	5	4	11	1	7	8	2	11	5	4	11	1	7	8	2	39.724	0	29.622	By MS/MS	By MS/MS	By MS/MS	By MS/MS	By matching	By MS/MS	By MS/MS	By MS/MS	32.4	19.3	14.7	32.4	2.4	27.3	27.3	7	13668000	3360700	3321700	19020000
tr|X5DNA9|X5DNA9_HUMANHCG2002594,isoformCRA_d(Fragment)OS=HomosapiensGN=SEPT5PE=2SV=1;sp|Q99719|SEPT5_HUMANSeptin-5OS=HomosapiensGN=SEPT5PE=1SV=1;tr|C9JM82|C9JM82_HUMANSeptin-5(Fragment)OS=HomosapiensGN=SEPT5PE=1SV=1;tr|B4DJ62|B4DJ62_HUMANHCG2002594,isoformCRA_aOS=HomosapiensGN=SEPT5PE=1SV=1;tr|Q7KYV2|Q7KYV2_HUMANH5(Fragment)OS=HomosapiensPE=2SV=1;tr|Q99648|Q99648_HUMANSeptin(Fragment)OS=Homosapi…	tr|X5DNA9|X5DNA9_HUMAN HCG2002594, isoform CRA_d (Fragment) OS=Homo sapiens GN=SEPT5 PE=2 SV=1;sp|Q99719|SEPT5_HUMAN Septin-5 OS=Homo sapiens GN=SEPT5 PE=1 SV=1;tr|C9JM82|C9JM82_HUMAN Septin-5 (Fragment) OS=Homo sapiens GN=SEPT5 PE=1 SV=1;tr|B4DJ62|B4DJ62_	679950	1541400	1323700	2246500	282480	2538000	1263100	644870	13	10	8	7	11	5	10	11	6	1	1	1	2	1	2	2	1	42.777	0	37.866	By MS/MS	By MS/MS	By MS/MS	By MS/MS	By MS/MS	By MS/MS	By MS/MS	By MS/MS	33.9	24.9	19.8	37.7	14.4	32.5	37.7	19	14959000	33912000	29121000	49422000
tr|A0A024RD80|A0A024RD80_HUMANHeatshockprotein90kDaalpha(Cytosolic),classBmember1,isoformCRA_aOS=HomosapiensGN=HSP90AB1PE=3SV=1;sp|P08238|HS90B_HUMANHeatshockproteinHSP90-betaOS=HomosapiensGN=HSP90AB1PE=1SV=4;tr|B4DMA2|B4DMA2_HUMANcDNAFLJ54023,highlysimilartoHeatshockproteinHSP90-betaOS=HomosapiensPE=2SV=1;tr|B4DGL0|B4DGL0_HUMANcDNAFLJ53619,highlysimilartoHeatshockproteinHSP90-betaOS=HomosapiensP…	tr|A0A024RD80|A0A024RD80_HUMAN Heat shock protein 90kDa alpha (Cytosolic), class B member 1, isoform CRA_a OS=Homo sapiens GN=HSP90AB1 PE=3 SV=1;sp|P08238|HS90B_HUMAN Heat shock protein HSP 90-beta OS=Homo sapiens GN=HSP90AB1 PE=1 SV=4;tr|B4DMA2|B4DMA2_HUM	674160	1182500	1369300	1663000	215810	1677900	286520	233020	10	21	18	18	22	11	15	14	10	12	8	8	12	5	8	7	4	83.263	0	32.518	By MS/MS	By MS/MS	By MS/MS	By MS/MS	By MS/MS	By MS/MS	By MS/MS	By MS/MS	33.7	28.6	28.5	34.8	16.2	23.6	23.6	15.3	22247000	39023000	45187000	54878000
tr|Q4L233|Q4L233_HUMANBrain-specificproteinp25alpha,isoformCRA_bOS=HomosapiensGN=FREP1PE=2SV=1;sp|O94811|TPPP_HUMANTubulinpolymerization-promotingproteinOS=HomosapiensGN=TPPPPE=1SV=1	tr|Q4L233|Q4L233_HUMAN Brain-specific protein p25 alpha, isoform CRA_b OS=Homo sapiens GN=FREP1 PE=2 SV=1;sp|O94811|TPPP_HUMAN Tubulin polymerization-promoting protein OS=Homo sapiens GN=TPPP PE=1 SV=1	671270	422960	816140	1420500	380850	1875000	1229100	3598900	2	6	3	4	7	3	7	7	6	6	3	4	7	3	7	7	6	23.693	0	22.927	By MS/MS	By MS/MS	By MS/MS	By MS/MS	By MS/MS	By MS/MS	By MS/MS	By MS/MS	35.2	15.1	19.2	35.2	13.2	39.3	39.3	31.5	7383900	4652500	8977500	15626000
sp|Q9UBB6-2|NCDN_HUMANIsoform2ofNeurochondrinOS=HomosapiensGN=NCDN;sp|Q9UBB6|NCDN_HUMANNeurochondrinOS=HomosapiensGN=NCDNPE=1SV=1;sp|Q9UBB6-3|NCDN_HUMANIsoform3ofNeurochondrinOS=HomosapiensGN=NCDN;tr|C9J5H8|C9J5H8_HUMANNeurochondrin(Fragment)OS=HomosapiensGN=NCDNPE=1SV=1;tr|B4DJ92|B4DJ92_HUMANcDNAFLJ57843,highlysimilartoHomosapiensneurochondrin(NCDN),transcriptvariant3,mRNAOS=HomosapiensPE=2SV=1;…	sp|Q9UBB6-2|NCDN_HUMAN Isoform 2 of Neurochondrin OS=Homo sapiens GN=NCDN;sp|Q9UBB6|NCDN_HUMAN Neurochondrin OS=Homo sapiens GN=NCDN PE=1 SV=1;sp|Q9UBB6-3|NCDN_HUMAN Isoform 3 of Neurochondrin OS=Homo sapiens GN=NCDN	671090	1549400	897260	1209100	483820	1590000	1154200	1621400	6	11	12	10	12	9	14	17	16	11	12	10	12	9	14	17	16	77.242	0	48.343	By MS/MS	By MS/MS	By MS/MS	By MS/MS	By MS/MS	By MS/MS	By MS/MS	By MS/MS	18.8	20.9	16.9	20.2	14.6	23.3	28.4	26.4	22146000	51131000	29610000	39901000
tr|A0A024R394|A0A024R394_HUMANCysteineandhistidine-richdomain(CHORD)-containing1,isoformCRA_cOS=HomosapiensGN=CHORDC1PE=4SV=1;sp|Q9UHD1|CHRD1_HUMANCysteineandhistidine-richdomain-containingprotein1OS=HomosapiensGN=CHORDC1PE=1SV=2;tr|A0A024R3C3|A0A024R3C3_HUMANCysteineandhistidine-richdomain(CHORD)-containing1,isoformCRA_bOS=HomosapiensGN=CHORDC1PE=4SV=1;sp|Q9UHD1-2|CHRD1_HUMANIsoform2ofCysteinean…	tr|A0A024R394|A0A024R394_HUMAN Cysteine and histidine-rich domain (CHORD)-containing 1, isoform CRA_c OS=Homo sapiens GN=CHORDC1 PE=4 SV=1;sp|Q9UHD1|CHRD1_HUMAN Cysteine and histidine-rich domain-containing protein 1 OS=Homo sapiens GN=CHORDC1 PE=1 SV=2;tr	670170	446550	668190	1040100	52606	517560	53431	15538	11	7	4	5	7	3	5	2	1	7	4	5	7	3	5	2	1	37.533	0	29.783	By MS/MS	By MS/MS	By MS/MS	By MS/MS	By matching	By MS/MS	By MS/MS	By matching	33.4	13.9	21.4	33.4	11.1	20.5	9.3	4.8	10723000	7144900	10691000	16642000
sp|Q9H1C7|CYTM1_HUMANCysteine-richandtransmembranedomain-containingprotein1OS=HomosapiensGN=CYSTM1PE=1SV=1	sp|Q9H1C7|CYTM1_HUMAN Cysteine-rich and transmembrane domain-containing protein 1 OS=Homo sapiens GN=CYSTM1 PE=1 SV=1	660420	2202300	2639900	1454400	1054000	2196300	368670	798820	1	2	2	2	2	2	2	2	2	2	2	2	2	2	2	2	2	10.631	0	3.336	By matching	By MS/MS	By MS/MS	By matching	By matching	By matching	By matching	By matching	11.3	11.3	11.3	11.3	11.3	11.3	11.3	11.3	1320800	4404600	5279700	2908700
sp|Q13555-6|KCC2G_HUMANIsoform6ofCalcium/calmodulin-dependentproteinkinasetypeIIsubunitgammaOS=HomosapiensGN=CAMK2G;sp|Q13555-7|KCC2G_HUMANIsoform7ofCalcium/calmodulin-dependentproteinkinasetypeIIsubunitgammaOS=HomosapiensGN=CAMK2G;sp|Q13555-9|KCC2G_HUMANIsoform9ofCalcium/calmodulin-dependentproteinkinasetypeIIsubunitgammaOS=HomosapiensGN=CAMK2G;sp|Q13555-8|KCC2G_HUMANIsoform8ofCalcium/calmodulin…	sp|Q13555-6|KCC2G_HUMAN Isoform 6 of Calcium/calmodulin-dependent protein kinase type II subunit gamma OS=Homo sapiens GN=CAMK2G;sp|Q13555-7|KCC2G_HUMAN Isoform 7 of Calcium/calmodulin-dependent protein kinase type II subunit gamma OS=Homo sapiens GN=CAMK2	658050	597280	810870	1716700	256560	1628400	544280	278100	8	17	15	14	16	12	18	15	12	1	1	1	1	1	1	1	1	65.241	0	103.2	By MS/MS	By MS/MS	By MS/MS	By MS/MS	By MS/MS	By MS/MS	By MS/MS	By MS/MS	41.3	35	30.4	37.1	24	37.8	29.1	22.4	17767000	16127000	21894000	46351000
sp|P04040|CATA_HUMANCatalaseOS=HomosapiensGN=CATPE=1SV=3;tr|B4DWK8|B4DWK8_HUMANCatalaseOS=HomosapiensPE=2SV=1;tr|Q8TAK2|Q8TAK2_HUMANSimilartocatalase(Fragment)OS=HomosapiensPE=2SV=1	sp|P04040|CATA_HUMAN Catalase OS=Homo sapiens GN=CAT PE=1 SV=3;tr|B4DWK8|B4DWK8_HUMAN Catalase OS=Homo sapiens PE=2 SV=1	657920	196730	267520	545650	10524	238120	335070	530910	3	11	6	5	9	1	5	12	10	11	6	5	9	1	5	12	10	59.755	0	36.661	By MS/MS	By MS/MS	By MS/MS	By MS/MS	By matching	By MS/MS	By MS/MS	By MS/MS	24.9	15.9	13.1	18.6	1.7	13.9	23.9	18.2	19080000	5705000	7758100	15824000
sp|P78559|MAP1A_HUMANMicrotubule-associatedprotein1AOS=HomosapiensGN=MAP1APE=1SV=6;tr|E9PGC8|E9PGC8_HUMANMicrotubule-associatedprotein1AOS=HomosapiensGN=MAP1APE=1SV=1;sp|P78559-2|MAP1A_HUMANIsoform2ofMicrotubule-associatedprotein1AOS=HomosapiensGN=MAP1A;tr|A8K4T7|A8K4T7_HUMANcDNAFLJ77111,highlysimilartoHomosapiensmicrotubule-associatedprotein1A(MAP1A),mRNA(Fragment)OS=HomosapiensPE=2SV=1;tr|Q504X…	sp|P78559|MAP1A_HUMAN Microtubule-associated protein 1A OS=Homo sapiens GN=MAP1A PE=1 SV=6;tr|E9PGC8|E9PGC8_HUMAN Microtubule-associated protein 1A OS=Homo sapiens GN=MAP1A PE=1 SV=1;sp|P78559-2|MAP1A_HUMAN Isoform 2 of Microtubule-associated protein 1A OS	654850	562440	1073700	1332500	225130	1178200	479180	854320	7	49	37	39	49	26	42	40	42	47	37	38	47	25	41	39	40	305.48	0	206.59	By MS/MS	By MS/MS	By MS/MS	By MS/MS	By MS/MS	By MS/MS	By MS/MS	By MS/MS	29.8	20.2	19.9	29.9	13.1	23.4	22.2	22.1	73343000	62993000	120260000	149230000
tr|F8VZI9|F8VZI9_HUMANProteinlifeguard2OS=HomosapiensGN=FAIM2PE=1SV=1;tr|A0A0A0MTP9|A0A0A0MTP9_HUMANProteinlifeguard2(Fragment)OS=HomosapiensGN=FAIM2PE=1SV=1;sp|Q9BWQ8|LFG2_HUMANProteinlifeguard2OS=HomosapiensGN=FAIM2PE=1SV=1	tr|F8VZI9|F8VZI9_HUMAN Protein lifeguard 2 OS=Homo sapiens GN=FAIM2 PE=1 SV=1;tr|A0A0A0MTP9|A0A0A0MTP9_HUMAN Protein lifeguard 2 (Fragment) OS=Homo sapiens GN=FAIM2 PE=1 SV=1;sp|Q9BWQ8|LFG2_HUMAN Protein lifeguard 2 OS=Homo sapiens GN=FAIM2 PE=1 SV=1	653830	3563700	1931200	1508800	257270	2539800	1040800	192200	3	1	3	2	1	1	3	2	1	1	3	2	1	1	3	2	1	22.68	0	15.118	By MS/MS	By MS/MS	By MS/MS	By MS/MS	By MS/MS	By MS/MS	By matching	By matching	9.6	20.7	10.1	9.6	9.6	20.7	20.2	10.6	1961500	10691000	5793700	4526300
tr|Q53GE2|Q53GE2_HUMANCappingprotein(Actinfilament)muscleZ-line,alpha2variant(Fragment)OS=HomosapiensPE=2SV=1;tr|Q53GC7|Q53GC7_HUMANCappingprotein(Actinfilament)muscleZ-line,alpha2variant(Fragment)OS=HomosapiensPE=2SV=1;tr|A4D0V4|A4D0V4_HUMANCappingprotein(Actinfilament)muscleZ-line,alpha2OS=HomosapiensGN=CAPZA2PE=2SV=1;sp|P47755|CAZA2_HUMANF-actin-cappingproteinsubunitalpha-2OS=HomosapiensGN=CAP…	tr|Q53GE2|Q53GE2_HUMAN Capping protein (Actin filament) muscle Z-line, alpha 2 variant (Fragment) OS=Homo sapiens PE=2 SV=1;tr|Q53GC7|Q53GC7_HUMAN Capping protein (Actin filament) muscle Z-line, alpha 2 variant (Fragment) OS=Homo sapiens PE=2 SV=1;tr|A4D0V	652020	797280	2171000	2343100	127400	2856100	523580	256960	9	7	6	6	8	3	7	6	5	5	5	5	6	2	5	4	3	32.967	0	19.203	By MS/MS	By MS/MS	By MS/MS	By MS/MS	By MS/MS	By MS/MS	By MS/MS	By MS/MS	37.8	28.3	28.3	40.6	11.2	35	28.7	22.4	8476300	10365000	28223000	30460000
tr|B2R5P6|B2R5P6_HUMANcDNA,FLJ92557,highlysimilartoHomosapiensthioredoxinreductase1(TXNRD1),mRNAOS=HomosapiensPE=2SV=1;tr|F8W809|F8W809_HUMANThioredoxinreductase1,cytoplasmicOS=HomosapiensGN=TXNRD1PE=1SV=1;sp|Q16881-5|TRXR1_HUMANIsoform5ofThioredoxinreductase1,cytoplasmicOS=HomosapiensGN=TXNRD1;sp|Q16881-2|TRXR1_HUMANIsoform2ofThioredoxinreductase1,cytoplasmicOS=HomosapiensGN=TXNRD1;tr|B7Z2S5|B7Z…	tr|B2R5P6|B2R5P6_HUMAN cDNA, FLJ92557, highly similar to Homo sapiens thioredoxin reductase 1 (TXNRD1), mRNA OS=Homo sapiens PE=2 SV=1;tr|F8W809|F8W809_HUMAN Thioredoxin reductase 1, cytoplasmic OS=Homo sapiens GN=TXNRD1 PE=1 SV=1;sp|Q16881-5|TRXR1_HUMAN I	649570	66859	144360	730390	14066	116220	159470	88894	25	13	2	3	10	1	5	3	2	12	1	3	9	1	5	3	2	54.546	0	49.259	By MS/MS	By MS/MS	By MS/MS	By MS/MS	By MS/MS	By MS/MS	By MS/MS	By matching	50.1	5	10.7	40.2	2.2	15.7	12.1	7.4	16239000	1671500	3609000	18260000
sp|Q16698-2|DECR_HUMANIsoform2of2,4-dienoyl-CoAreductase,mitochondrialOS=HomosapiensGN=DECR1;tr|A0A024R9D7|A0A024R9D7_HUMAN2,4-dienoylCoAreductase1,mitochondrial,isoformCRA_bOS=HomosapiensGN=DECR1PE=4SV=1;sp|Q16698|DECR_HUMAN2,4-dienoyl-CoAreductase,mitochondrialOS=HomosapiensGN=DECR1PE=1SV=1;tr|E5RJG7|E5RJG7_HUMAN2,4-dienoyl-CoAreductase,mitochondrial(Fragment)OS=HomosapiensGN=DECR1PE=1SV=1;tr|Q…	sp|Q16698-2|DECR_HUMAN Isoform 2 of 2,4-dienoyl-CoA reductase, mitochondrial OS=Homo sapiens GN=DECR1;tr|A0A024R9D7|A0A024R9D7_HUMAN 2,4-dienoyl CoA reductase 1, mitochondrial, isoform CRA_b OS=Homo sapiens GN=DECR1 PE=4 SV=1;sp|Q16698|DECR_HUMAN 2,4-dieno	644910	122870	595790	813010	99404	941680	1498800	2949900	9	6	4	5	5	3	7	8	7	6	4	5	5	3	7	8	7	34.994	0	85.692	By MS/MS	By MS/MS	By MS/MS	By MS/MS	By MS/MS	By MS/MS	By MS/MS	By MS/MS	25.5	16	19.9	19.9	10.1	27.9	33.4	25.8	12898000	2457400	11916000	16260000
tr|A0A024RB09|A0A024RB09_HUMANRAB5B,memberRASoncogenefamily,isoformCRA_aOS=HomosapiensGN=RAB5BPE=4SV=1;sp|P61020|RAB5B_HUMANRas-relatedproteinRab-5BOS=HomosapiensGN=RAB5BPE=1SV=1;tr|Q6FI54|Q6FI54_HUMANRAB5BproteinOS=HomosapiensGN=RAB5BPE=2SV=1;sp|P61020-2|RAB5B_HUMANIsoform2ofRas-relatedproteinRab-5BOS=HomosapiensGN=RAB5B;tr|F8VUA5|F8VUA5_HUMANRas-relatedproteinRab-5B(Fragment)OS=HomosapiensGN=RA…	tr|A0A024RB09|A0A024RB09_HUMAN RAB5B, member RAS oncogene family, isoform CRA_a OS=Homo sapiens GN=RAB5B PE=4 SV=1;sp|P61020|RAB5B_HUMAN Ras-related protein Rab-5B OS=Homo sapiens GN=RAB5B PE=1 SV=1;tr|Q6FI54|Q6FI54_HUMAN RAB5B protein OS=Homo sapiens GN=R	641310	716910	838290	1029000	216090	820290	313670	188400	13	6	4	4	6	3	4	4	3	4	2	2	4	2	3	3	2	23.707	0	19.178	By MS/MS	By MS/MS	By MS/MS	By MS/MS	By MS/MS	By MS/MS	By MS/MS	By MS/MS	37.7	22.3	22.3	37.7	17.2	27	22.8	17.2	7054400	7886000	9221200	11319000
sp|Q9H9B4|SFXN1_HUMANSideroflexin-1OS=HomosapiensGN=SFXN1PE=1SV=4;tr|D6RFI0|D6RFI0_HUMANSideroflexin-1(Fragment)OS=HomosapiensGN=SFXN1PE=1SV=8;tr|D6RDG7|D6RDG7_HUMANSideroflexin-1(Fragment)OS=HomosapiensGN=SFXN1PE=1SV=1;tr|S4R2X2|S4R2X2_HUMANSideroflexin-1OS=HomosapiensGN=SFXN1PE=1SV=1;tr|D6RAE9|D6RAE9_HUMANSideroflexin-1OS=HomosapiensGN=SFXN1PE=1SV=1	sp|Q9H9B4|SFXN1_HUMAN Sideroflexin-1 OS=Homo sapiens GN=SFXN1 PE=1 SV=4;tr|D6RFI0|D6RFI0_HUMAN Sideroflexin-1 (Fragment) OS=Homo sapiens GN=SFXN1 PE=1 SV=8	637450	3022500	2494500	1988500	989910	4075700	560220	41521	5	8	8	8	9	8	11	9	2	7	7	7	8	7	10	9	2	35.619	0	24.627	By MS/MS	By MS/MS	By MS/MS	By MS/MS	By MS/MS	By MS/MS	By MS/MS	By matching	31.1	30.7	31.1	35.4	29.8	43.5	32.9	5.9	10199000	48360000	39912000	31817000
tr|B7Z2X6|B7Z2X6_HUMANcDNAFLJ52145,highlysimilartoG-proteincoupledreceptorfamilyCgroup5memberBOS=HomosapiensPE=2SV=1;tr|B7Z440|B7Z440_HUMANcDNAFLJ53055,highlysimilartoG-proteincoupledreceptorfamilyCgroup5memberBOS=HomosapiensPE=2SV=1;tr|B7Z2G0|B7Z2G0_HUMANcDNAFLJ54266,highlysimilartoG-proteincoupledreceptorfamilyCgroup5memberBOS=HomosapiensPE=2SV=1;tr|B7Z9M4|B7Z9M4_HUMANcDNA,FLJ78888,highlysimila…	tr|B7Z2X6|B7Z2X6_HUMAN cDNA FLJ52145, highly similar to G-protein coupled receptor family C group 5 member B OS=Homo sapiens PE=2 SV=1;tr|B7Z440|B7Z440_HUMAN cDNA FLJ53055, highly similar to G-protein coupled receptor family C group 5 member B OS=Homo sapi	633440	1474600	1567600	362030	143070	1274900	162870	168200	8	3	3	3	2	2	3	1	1	3	3	3	2	2	3	1	1	20.727	0	6.4754	By MS/MS	By MS/MS	By MS/MS	By MS/MS	By matching	By MS/MS	By MS/MS	By MS/MS	13.7	13.7	13.7	7.4	12.6	13.7	6.3	6.3	4434100	10322000	10973000	2534200
sp|Q7Z699|SPRE1_HUMANSprouty-related,EVH1domain-containingprotein1OS=HomosapiensGN=SPRED1PE=1SV=2;tr|H0YMN8|H0YMN8_HUMANSprouty-related,EVH1domain-containingprotein1(Fragment)OS=HomosapiensGN=SPRED1PE=1SV=1;tr|H7C3Y6|H7C3Y6_HUMANSprouty-related,EVH1domain-containingprotein2(Fragment)OS=HomosapiensGN=SPRED2PE=1SV=1	sp|Q7Z699|SPRE1_HUMAN Sprouty-related, EVH1 domain-containing protein 1 OS=Homo sapiens GN=SPRED1 PE=1 SV=2	629360	667700	608740	960690	59990	697600	270040	317950	3	10	8	8	9	5	7	6	6	9	7	7	8	4	6	5	5	50.476	0	26.141	By MS/MS	By MS/MS	By MS/MS	By MS/MS	By MS/MS	By MS/MS	By MS/MS	By MS/MS	33.3	23.9	24.8	31.1	15.8	21.4	19.1	19.1	13217000	14022000	12783000	20174000
tr|A0A0C4DH22|A0A0C4DH22_HUMANBand4.1-likeprotein1OS=HomosapiensGN=EPB41L1PE=1SV=1;sp|Q9H4G0|E41L1_HUMANBand4.1-likeprotein1OS=HomosapiensGN=EPB41L1PE=1SV=2;tr|B7Z653|B7Z653_HUMANcDNAFLJ61657,highlysimilartoBand4.1-likeprotein1OS=HomosapiensPE=2SV=1;sp|Q9H4G0-4|E41L1_HUMANIsoform4ofBand4.1-likeprotein1OS=HomosapiensGN=EPB41L1;tr|X6RC15|X6RC15_HUMANBand4.1-likeprotein1(Fragment)OS=HomosapiensGN=EP…	tr|A0A0C4DH22|A0A0C4DH22_HUMAN Band 4.1-like protein 1 OS=Homo sapiens GN=EPB41L1 PE=1 SV=1;sp|Q9H4G0|E41L1_HUMAN Band 4.1-like protein 1 OS=Homo sapiens GN=EPB41L1 PE=1 SV=2;tr|B7Z653|B7Z653_HUMAN cDNA FLJ61657, highly similar to Band 4.1-like protein 1 O	625180	1271800	1392100	1923900	315170	2668600	173780	55531	12	26	23	19	26	15	25	16	8	4	4	3	4	3	4	4	3	98.374	0	239.12	By MS/MS	By MS/MS	By MS/MS	By MS/MS	By MS/MS	By MS/MS	By MS/MS	By MS/MS	37.6	31.1	23.8	37.6	18.2	35.2	19.9	9.4	29383000	59776000	65428000	90422000
tr|Q9NX12|Q9NX12_HUMANcDNAFLJ20496fis,cloneKAT08729OS=HomosapiensPE=2SV=1;sp|Q9Y287|ITM2B_HUMANIntegralmembraneprotein2BOS=HomosapiensGN=ITM2BPE=1SV=1;sp|Q9Y287-2|ITM2B_HUMANIsoform2ofIntegralmembraneprotein2BOS=HomosapiensGN=ITM2B;tr|Q7Z528|Q7Z528_HUMANE3-16OS=HomosapiensPE=2SV=1	tr|Q9NX12|Q9NX12_HUMAN cDNA FLJ20496 fis, clone KAT08729 OS=Homo sapiens PE=2 SV=1;sp|Q9Y287|ITM2B_HUMAN Integral membrane protein 2B OS=Homo sapiens GN=ITM2B PE=1 SV=1;sp|Q9Y287-2|ITM2B_HUMAN Isoform 2 of Integral membrane protein 2B OS=Homo sapiens GN=IT	619740	1117100	898180	835520	196580	896000	1065600	132370	4	8	6	4	7	2	4	4	3	8	6	4	7	2	4	4	3	30.312	0	26.35	By MS/MS	By MS/MS	By MS/MS	By MS/MS	By MS/MS	By MS/MS	By MS/MS	By MS/MS	40.6	30.1	25.9	40.6	15	24.8	25.6	15	8056600	14522000	11676000	10862000
tr|V9HW98|V9HW98_HUMANEpididymisluminalprotein2OS=HomosapiensGN=HEL2PE=1SV=1;sp|P62258|1433E_HUMAN14-3-3proteinepsilonOS=HomosapiensGN=YWHAEPE=1SV=1;sp|P62258-2|1433E_HUMANIsoformSVof14-3-3proteinepsilonOS=HomosapiensGN=YWHAE;tr|G9K389|G9K389_HUMANYWHAE/FAM22Bfusionprotein(Fragment)OS=HomosapiensGN=YWHAE/FAM22BfusionPE=2SV=1;tr|G9K388|G9K388_HUMANYWHAE/FAM22Afusionprotein(Fragment)OS=HomosapiensG…	tr|V9HW98|V9HW98_HUMAN Epididymis luminal protein 2 OS=Homo sapiens GN=HEL2 PE=1 SV=1;sp|P62258|1433E_HUMAN 14-3-3 protein epsilon OS=Homo sapiens GN=YWHAE PE=1 SV=1;sp|P62258-2|1433E_HUMAN Isoform SV of 14-3-3 protein epsilon OS=Homo sapiens GN=YWHAE;tr|G	619160	634800	1202100	1975000	246690	1613000	641810	1824700	13	9	7	8	9	6	8	8	6	7	5	6	7	5	6	6	5	29.174	0	25.748	By MS/MS	By MS/MS	By MS/MS	By MS/MS	By MS/MS	By MS/MS	By MS/MS	By MS/MS	42.7	30.6	30.6	42.7	22	34.9	30.6	21.6	10526000	10792000	20436000	33574000
tr|A0A024R210|A0A024R210_HUMANInterferoninducedtransmembraneprotein1(9-27),isoformCRA_aOS=HomosapiensGN=IFITM1PE=4SV=1;tr|H7BYV1|H7BYV1_HUMANInterferon-inducedtransmembraneprotein2(Fragment)OS=HomosapiensGN=IFITM2PE=4SV=1;tr|E9PS44|E9PS44_HUMANInterferon-inducedtransmembraneprotein3OS=HomosapiensGN=IFITM3PE=1SV=1;tr|E9PQN9|E9PQN9_HUMANInterferon-inducedtransmembraneprotein2OS=HomosapiensGN=IFITM2…	tr|A0A024R210|A0A024R210_HUMAN Interferon induced transmembrane protein 1 (9-27), isoform CRA_a OS=Homo sapiens GN=IFITM1 PE=4 SV=1	613770	1687700	4202600	2495600	1576400	896570	344550	1382000	11	1	2	3	2	1	1	1	1	1	2	3	2	1	1	1	1	13.938	0	7.9006	By MS/MS	By MS/MS	By MS/MS	By MS/MS	By MS/MS	By matching	By matching	By MS/MS	12.8	27.2	29.6	27.2	12.8	12.8	12.8	12.8	1227500	3375300	8405300	4991300
sp|P62070|RRAS2_HUMANRas-relatedproteinR-Ras2OS=HomosapiensGN=RRAS2PE=1SV=1;sp|P62070-4|RRAS2_HUMANIsoform4ofRas-relatedproteinR-Ras2OS=HomosapiensGN=RRAS2;sp|P62070-3|RRAS2_HUMANIsoform3ofRas-relatedproteinR-Ras2OS=HomosapiensGN=RRAS2;sp|P62070-2|RRAS2_HUMANIsoform2ofRas-relatedproteinR-Ras2OS=HomosapiensGN=RRAS2;tr|E9PK85|E9PK85_HUMANRas-relatedproteinR-Ras2(Fragment)OS=HomosapiensGN=RRAS2PE=1S…	sp|P62070|RRAS2_HUMAN Ras-related protein R-Ras2 OS=Homo sapiens GN=RRAS2 PE=1 SV=1;sp|P62070-4|RRAS2_HUMAN Isoform 4 of Ras-related protein R-Ras2 OS=Homo sapiens GN=RRAS2;sp|P62070-3|RRAS2_HUMAN Isoform 3 of Ras-related protein R-Ras2 OS=Homo sapiens GN=	612430	436770	304410	589510	83211	524530	161160	229270	7	6	5	3	5	3	5	5	4	4	4	2	3	2	3	3	3	23.399	0	106.96	By MS/MS	By MS/MS	By MS/MS	By MS/MS	By MS/MS	By MS/MS	By MS/MS	By MS/MS	38.2	30.4	17.6	31.9	18.1	32.4	32.4	24.5	9186500	6551600	4566100	8842600
tr|B7ZAF6|B7ZAF6_HUMANSuccinate--CoAligase[ADP-forming]subunitbeta,mitochondrialOS=HomosapiensGN=SUCLA2PE=2SV=1;tr|B4DRV2|B4DRV2_HUMANSuccinate--CoAligase[ADP-forming]subunitbeta,mitochondrialOS=HomosapiensGN=SUCLA2PE=2SV=1;tr|E5KS55|E5KS55_HUMANSuccinate--CoAligase[ADP-forming]subunitbeta,mitochondrialOS=HomosapiensGN=SUCLA2PE=3SV=1;sp|Q9P2R7-2|SUCB1_HUMANIsoform2ofSuccinate--CoAligase[ADP-formi…	tr|B7ZAF6|B7ZAF6_HUMAN Succinate--CoA ligase [ADP-forming] subunit beta, mitochondrial OS=Homo sapiens GN=SUCLA2 PE=2 SV=1;tr|B4DRV2|B4DRV2_HUMAN Succinate--CoA ligase [ADP-forming] subunit beta, mitochondrial OS=Homo sapiens GN=SUCLA2 PE=2 SV=1;tr|E5KS55|	610950	696650	868210	1424100	499150	1733900	971750	677750	17	12	7	7	12	6	8	11	9	1	1	1	1	1	1	1	2	43.855	0	21.205	By MS/MS	By MS/MS	By MS/MS	By MS/MS	By MS/MS	By MS/MS	By MS/MS	By MS/MS	42.7	16.3	16.3	42.7	14.6	19	38	22.5	14663000	16720000	20837000	34179000
tr|V9HWA9|V9HWA9_HUMANEpididymissecretoryspermbindingproteinLi62pOS=HomosapiensGN=HEL-S-62pPE=2SV=1;sp|P01024|CO3_HUMANComplementC3OS=HomosapiensGN=C3PE=1SV=2;tr|B4E216|B4E216_HUMANcDNAFLJ57339,highlysimilartoComplementC3OS=HomosapiensPE=2SV=1;CON__Q2UVX4;tr|M0QYC8|M0QYC8_HUMANComplementC3(Fragment)OS=HomosapiensGN=C3PE=1SV=1;tr|M0QXZ3|M0QXZ3_HUMANComplementC3(Fragment)OS=HomosapiensGN=C3PE=1SV=1…	tr|V9HWA9|V9HWA9_HUMAN Epididymis secretory sperm binding protein Li 62p OS=Homo sapiens GN=HEL-S-62p PE=2 SV=1;sp|P01024|CO3_HUMAN Complement C3 OS=Homo sapiens GN=C3 PE=1 SV=2;tr|B4E216|B4E216_HUMAN cDNA FLJ57339, highly similar to Complement C3 OS=Homo	609840	167100	355830	529800	20166	215320	34471	43513	8	41	20	23	30	7	13	9	6	41	20	23	30	7	13	9	6	187.15	0	140.68	By MS/MS	By MS/MS	By MS/MS	By MS/MS	By MS/MS	By MS/MS	By MS/MS	By MS/MS	33.8	16.1	18.2	24.5	5.2	11.1	7.3	4.3	59155000	16208000	34516000	51391000
sp|P49411|EFTU_HUMANElongationfactorTu,mitochondrialOS=HomosapiensGN=TUFMPE=1SV=2;tr|H3BNU3|H3BNU3_HUMANElongationfactorTu,mitochondrialOS=HomosapiensGN=TUFMPE=1SV=1	sp|P49411|EFTU_HUMAN Elongation factor Tu, mitochondrial OS=Homo sapiens GN=TUFM PE=1 SV=2	609530	742910	674260	1391000	954300	2715500	1357700	491650	2	13	11	10	13	12	15	14	10	13	11	10	13	12	15	14	10	49.541	0	34.943	By MS/MS	By MS/MS	By MS/MS	By MS/MS	By MS/MS	By MS/MS	By MS/MS	By MS/MS	33.2	27	25.4	40.5	28.3	36.9	35.2	25.4	18286000	22287000	20228000	41730000
sp|Q15149-7|PLEC_HUMANIsoform7ofPlectinOS=HomosapiensGN=PLEC;sp|Q15149-8|PLEC_HUMANIsoform8ofPlectinOS=HomosapiensGN=PLEC;sp|Q15149-9|PLEC_HUMANIsoform9ofPlectinOS=HomosapiensGN=PLEC;sp|Q15149-5|PLEC_HUMANIsoform5ofPlectinOS=HomosapiensGN=PLEC;sp|Q15149-4|PLEC_HUMANIsoform4ofPlectinOS=HomosapiensGN=PLEC;sp|Q15149-6|PLEC_HUMANIsoform6ofPlectinOS=HomosapiensGN=PLEC;sp|Q15149-2|PLEC_HUMANIsoform2ofP…	sp|Q15149-7|PLEC_HUMAN Isoform 7 of Plectin OS=Homo sapiens GN=PLEC;sp|Q15149-8|PLEC_HUMAN Isoform 8 of Plectin OS=Homo sapiens GN=PLEC;sp|Q15149-9|PLEC_HUMAN Isoform 9 of Plectin OS=Homo sapiens GN=PLEC;sp|Q15149-5|PLEC_HUMAN Isoform 5 of Plectin OS=Homo	608390	179310	142010	327400	24673	131520	148160	236900	15	128	61	37	88	21	37	60	57	0	0	0	0	0	0	0	2	512.6	0	302.89	By MS/MS	By MS/MS	By MS/MS	By MS/MS	By MS/MS	By MS/MS	By MS/MS	By MS/MS	34.8	16.2	9.9	25.2	5.2	10.9	15.7	14.8	169740000	50028000	39621000	91345000
sp|Q08211|DHX9_HUMANATP-dependentRNAhelicaseAOS=HomosapiensGN=DHX9PE=1SV=4;tr|B3KU66|B3KU66_HUMANcDNAFLJ39263fis,cloneOCBBF2009571,highlysimilartoATP-dependentRNAhelicaseA(EC3.6.1.-)OS=HomosapiensPE=2SV=1;tr|Q58F26|Q58F26_HUMANDHX9protein(Fragment)OS=HomosapiensGN=DHX9PE=2SV=1;tr|Q6PJK6|Q6PJK6_HUMANDHX9protein(Fragment)OS=HomosapiensGN=DHX9PE=2SV=1;sp|Q08211-2|DHX9_HUMANIsoform2ofATP-dependentRNA…	sp|Q08211|DHX9_HUMAN ATP-dependent RNA helicase A OS=Homo sapiens GN=DHX9 PE=1 SV=4;tr|B3KU66|B3KU66_HUMAN cDNA FLJ39263 fis, clone OCBBF2009571, highly similar to ATP-dependent RNA helicase A (EC 3.6.1.-) OS=Homo sapiens PE=2 SV=1	602840	190420	419110	593950	78696	448480	85882	20588	5	18	10	10	17	6	12	7	3	18	10	10	17	6	12	7	3	140.96	0	73.168	By MS/MS	By MS/MS	By MS/MS	By MS/MS	By MS/MS	By MS/MS	By MS/MS	By matching	19.1	9.4	9.4	17.4	5	11.7	5.8	2.6	36773000	11616000	25566000	36231000
sp|O43617|TPPC3_HUMANTraffickingproteinparticlecomplexsubunit3OS=HomosapiensGN=TRAPPC3PE=1SV=1;tr|A0A087WWM0|A0A087WWM0_HUMANTraffickingproteinparticlecomplexsubunitOS=HomosapiensGN=TRAPPC3PE=1SV=1;sp|O43617-2|TPPC3_HUMANIsoform2ofTraffickingproteinparticlecomplexsubunit3OS=HomosapiensGN=TRAPPC3;tr|A6NKE1|A6NKE1_HUMANTraffickingproteinparticlecomplexsubunit3OS=HomosapiensGN=TRAPPC3PE=1SV=1;tr|A0A…	sp|O43617|TPPC3_HUMAN Trafficking protein particle complex subunit 3 OS=Homo sapiens GN=TRAPPC3 PE=1 SV=1;tr|A0A087WWM0|A0A087WWM0_HUMAN Trafficking protein particle complex subunit OS=Homo sapiens GN=TRAPPC3 PE=1 SV=1;sp|O43617-2|TPPC3_HUMAN Isoform 2 of	598910	2764700	1532500	813710	258800	1100500	424540	1759000	5	5	6	4	4	4	4	5	6	5	6	4	4	4	4	5	6	20.274	0	20.538	By MS/MS	By MS/MS	By MS/MS	By MS/MS	By MS/MS	By MS/MS	By MS/MS	By MS/MS	28.9	31.1	25	22.8	16.7	18.3	22.8	25	5390200	24883000	13793000	7323400
sp|P05771-2|KPCB_HUMANIsoformBeta-IIofProteinkinaseCbetatypeOS=HomosapiensGN=PRKCB;sp|P05771|KPCB_HUMANProteinkinaseCbetatypeOS=HomosapiensGN=PRKCBPE=1SV=4;tr|I3L148|I3L148_HUMANProteinkinaseCbetatype(Fragment)OS=HomosapiensGN=PRKCBPE=1SV=1;tr|H3BV73|H3BV73_HUMANProteinkinaseCbetatype(Fragment)OS=HomosapiensGN=PRKCBPE=1SV=1;tr|J3KN97|J3KN97_HUMANProteinkinaseCalphatype(Fragment)OS=HomosapiensGN=P…	sp|P05771-2|KPCB_HUMAN Isoform Beta-II of Protein kinase C beta type OS=Homo sapiens GN=PRKCB;sp|P05771|KPCB_HUMAN Protein kinase C beta type OS=Homo sapiens GN=PRKCB PE=1 SV=4	598860	2292600	2184200	1691800	381070	2252500	463800	200970	6	16	18	17	15	11	18	16	9	6	10	10	5	6	8	8	7	77.011	0	72.173	By MS/MS	By MS/MS	By MS/MS	By MS/MS	By MS/MS	By MS/MS	By MS/MS	By MS/MS	34.9	34.2	33.1	33.6	19.5	39.4	32.7	16	20960000	80241000	76445000	59211000
tr|B7Z899|B7Z899_HUMANAminopeptidaseOS=HomosapiensPE=2SV=1;tr|B7Z4B2|B7Z4B2_HUMANAminopeptidaseOS=HomosapiensPE=2SV=1;tr|E9PLK3|E9PLK3_HUMANAminopeptidaseOS=HomosapiensGN=NPEPPSPE=1SV=1;sp|P55786|PSA_HUMANPuromycin-sensitiveaminopeptidaseOS=HomosapiensGN=NPEPPSPE=1SV=2;sp|P55786-2|PSA_HUMANIsoform2ofPuromycin-sensitiveaminopeptidaseOS=HomosapiensGN=NPEPPS;tr|B3KU93|B3KU93_HUMANAminopeptidaseOS=Ho…	tr|B7Z899|B7Z899_HUMAN Aminopeptidase OS=Homo sapiens PE=2 SV=1;tr|B7Z4B2|B7Z4B2_HUMAN Aminopeptidase OS=Homo sapiens PE=2 SV=1;tr|E9PLK3|E9PLK3_HUMAN Aminopeptidase OS=Homo sapiens GN=NPEPPS PE=1 SV=1;sp|P55786|PSA_HUMAN Puromycin-sensitive aminopeptidase	596370	473680	824230	1434700	96311	1161500	345190	515650	22	20	17	16	21	8	16	17	15	20	17	16	21	8	16	17	15	102.93	0	62.962	By MS/MS	By MS/MS	By MS/MS	By MS/MS	By MS/MS	By MS/MS	By MS/MS	By MS/MS	29	21	19	30.1	8.5	21.2	20.9	18.3	28029000	22263000	38739000	67433000
sp|Q8IWA5|CTL2_HUMANCholinetransporter-likeprotein2OS=HomosapiensGN=SLC44A2PE=1SV=3;sp|Q8IWA5-2|CTL2_HUMANIsoform2ofCholinetransporter-likeprotein2OS=HomosapiensGN=SLC44A2;tr|K7EPV6|K7EPV6_HUMANCholinetransporter-likeprotein2(Fragment)OS=HomosapiensGN=SLC44A2PE=1SV=1;tr|K7ER17|K7ER17_HUMANCholinetransporter-likeprotein2OS=HomosapiensGN=SLC44A2PE=1SV=1;tr|K7EMR2|K7EMR2_HUMANCholinetransporter-like…	sp|Q8IWA5|CTL2_HUMAN Choline transporter-like protein 2 OS=Homo sapiens GN=SLC44A2 PE=1 SV=3;sp|Q8IWA5-2|CTL2_HUMAN Isoform 2 of Choline transporter-like protein 2 OS=Homo sapiens GN=SLC44A2	594380	0	0	46034	0	968020	0	0	5	18	16	14	19	8	19	13	9	0	0	0	0	0	0	0	0	80.123	0	5.4481	By MS/MS	By matching	By matching	By matching	By matching	By MS/MS	By matching	By matching	29.6	23.4	20.5	29.9	10.2	28.5	19.3	10.3	16643000	0	0	1289000
tr|V9HW35|V9HW35_HUMANEpididymissecretoryproteinLi55OS=HomosapiensGN=HEL-S-55PE=2SV=1;sp|P30044-2|PRDX5_HUMANIsoformCytoplasmic+peroxisomalofPeroxiredoxin-5,mitochondrialOS=HomosapiensGN=PRDX5;sp|P30044|PRDX5_HUMANPeroxiredoxin-5,mitochondrialOS=HomosapiensGN=PRDX5PE=1SV=4;sp|P30044-3|PRDX5_HUMANIsoform3ofPeroxiredoxin-5,mitochondrialOS=HomosapiensGN=PRDX5;sp|P30044-4|PRDX5_HUMANIsoform4ofPeroxir…	tr|V9HW35|V9HW35_HUMAN Epididymis secretory protein Li 55 OS=Homo sapiens GN=HEL-S-55 PE=2 SV=1;sp|P30044-2|PRDX5_HUMAN Isoform Cytoplasmic+peroxisomal of Peroxiredoxin-5, mitochondrial OS=Homo sapiens GN=PRDX5;sp|P30044|PRDX5_HUMAN Peroxiredoxin-5, mitoch	594220	1174400	1524300	855870	113890	1351700	1402300	3422100	5	7	5	5	6	1	4	4	5	7	5	5	6	1	4	4	5	17.031	0	10.129	By MS/MS	By MS/MS	By MS/MS	By MS/MS	By MS/MS	By MS/MS	By MS/MS	By MS/MS	52.5	31.5	32.7	52.5	6.8	22.8	22.8	32.7	5348000	10570000	13719000	7702800
sp|Q6PCE3|PGM2L_HUMANGlucose1,6-bisphosphatesynthaseOS=HomosapiensGN=PGM2L1PE=1SV=3	sp|Q6PCE3|PGM2L_HUMAN Glucose 1,6-bisphosphate synthase OS=Homo sapiens GN=PGM2L1 PE=1 SV=3	593750	733580	1465300	1722100	185540	1764900	493380	278940	1	17	15	16	18	7	15	15	10	17	15	16	18	7	15	15	10	70.441	0	55.201	By MS/MS	By MS/MS	By MS/MS	By MS/MS	By MS/MS	By MS/MS	By MS/MS	By MS/MS	28.3	28	33.3	30.2	11.3	33.3	31.8	17	19594000	24208000	48354000	56828000
tr|Q496C9|Q496C9_HUMAND-tyrosyl-tRNA(Tyr)deacylaseOS=HomosapiensGN=DTD1PE=2SV=1;sp|Q8TEA8|DTD1_HUMAND-tyrosyl-tRNA(Tyr)deacylase1OS=HomosapiensGN=DTD1PE=1SV=2;tr|A0A087WZV9|A0A087WZV9_HUMAND-tyrosyl-tRNA(Tyr)deacylase(Fragment)OS=HomosapiensGN=DTD1PE=1SV=1	tr|Q496C9|Q496C9_HUMAN D-tyrosyl-tRNA(Tyr) deacylase OS=Homo sapiens GN=DTD1 PE=2 SV=1;sp|Q8TEA8|DTD1_HUMAN D-tyrosyl-tRNA(Tyr) deacylase 1 OS=Homo sapiens GN=DTD1 PE=1 SV=2;tr|A0A087WZV9|A0A087WZV9_HUMAN D-tyrosyl-tRNA(Tyr) deacylase (Fragment) OS=Homo sa	590890	455010	347240	271010	0	411330	702970	1331500	3	4	2	1	1	1	1	3	3	4	2	1	1	1	1	3	3	23.483	0	13.547	By MS/MS	By MS/MS	By MS/MS	By MS/MS	By MS/MS	By MS/MS	By MS/MS	By MS/MS	26.8	11.5	7.7	7.7	7.7	7.7	18.7	18.7	4727100	3640100	2777900	2168100
tr|A8K6Q3|A8K6Q3_HUMANcDNAFLJ75880,highlysimilartoHomosapienssynapticvesicleglycoprotein2A(SV2A),mRNAOS=HomosapiensPE=2SV=1;sp|Q7L0J3|SV2A_HUMANSynapticvesicleglycoprotein2AOS=HomosapiensGN=SV2APE=1SV=1;sp|Q7L0J3-2|SV2A_HUMANIsoform2ofSynapticvesicleglycoprotein2AOS=HomosapiensGN=SV2A;tr|B4E000|B4E000_HUMANcDNAFLJ57689,highlysimilartoSynapticvesicleglycoprotein2AOS=HomosapiensPE=2SV=1	tr|A8K6Q3|A8K6Q3_HUMAN cDNA FLJ75880, highly similar to Homo sapiens synaptic vesicle glycoprotein 2A (SV2A), mRNA OS=Homo sapiens PE=2 SV=1;sp|Q7L0J3|SV2A_HUMAN Synaptic vesicle glycoprotein 2A OS=Homo sapiens GN=SV2A PE=1 SV=1;sp|Q7L0J3-2|SV2A_HUMAN Isof	590380	3640200	4327800	4942900	1286400	10124000	1327700	150800	4	10	11	11	12	8	12	11	6	10	11	11	12	8	12	11	6	82.695	0	88.39	By MS/MS	By MS/MS	By MS/MS	By MS/MS	By MS/MS	By MS/MS	By MS/MS	By MS/MS	14.4	17	14.7	19.7	10.8	16.8	16.4	8.6	15350000	94645000	112520000	128520000
sp|Q14964|RB39A_HUMANRas-relatedproteinRab-39AOS=HomosapiensGN=RAB39APE=1SV=2;tr|C9JB90|C9JB90_HUMANRas-relatedproteinRab-6B(Fragment)OS=HomosapiensGN=RAB6BPE=4SV=1;tr|C9JU14|C9JU14_HUMANRas-relatedproteinRab-6B(Fragment)OS=HomosapiensGN=RAB6BPE=1SV=3;tr|J3KR73|J3KR73_HUMANRas-relatedproteinRab-6B(Fragment)OS=HomosapiensGN=RAB6BPE=1SV=1;tr|B7Z5Z9|B7Z5Z9_HUMANcDNAFLJ51066,highlysimilartoRas-relate…	sp|Q14964|RB39A_HUMAN Ras-related protein Rab-39A OS=Homo sapiens GN=RAB39A PE=1 SV=2	588830	3111600	1746800	2245600	391840	2984800	633310	323810	15	2	2	2	2	1	3	2	1	2	2	2	2	1	3	2	1	25.006	0	5.0845	By MS/MS	By MS/MS	By MS/MS	By MS/MS	By MS/MS	By MS/MS	By MS/MS	By MS/MS	6	6	6	6	5.1	10.1	6	5.1	9421300	49785000	27948000	35930000
sp|Q9UN36-2|NDRG2_HUMANIsoform2ofProteinNDRG2OS=HomosapiensGN=NDRG2;tr|G3V4S9|G3V4S9_HUMANProteinNDRG2(Fragment)OS=HomosapiensGN=NDRG2PE=1SV=8;sp|Q9UN36-4|NDRG2_HUMANIsoform4ofProteinNDRG2OS=HomosapiensGN=NDRG2;tr|Q8TDR6|Q8TDR6_HUMANCytoplasmicproteinNdr1OS=HomosapiensPE=2SV=1;tr|A0A0A0MS87|A0A0A0MS87_HUMANProteinNDRG2OS=HomosapiensGN=NDRG2PE=1SV=1;sp|Q9UN36-3|NDRG2_HUMANIsoform3ofProteinNDRG2OS=…	sp|Q9UN36-2|NDRG2_HUMAN Isoform 2 of Protein NDRG2 OS=Homo sapiens GN=NDRG2;tr|G3V4S9|G3V4S9_HUMAN Protein NDRG2 (Fragment) OS=Homo sapiens GN=NDRG2 PE=1 SV=8;sp|Q9UN36-4|NDRG2_HUMAN Isoform 4 of Protein NDRG2 OS=Homo sapiens GN=NDRG2;tr|Q8TDR6|Q8TDR6_HUMA	587330	844610	926170	1108500	522490	2591500	280390	589510	50	6	4	4	6	4	7	4	4	6	4	4	6	4	7	4	4	39.289	0	32.314	By MS/MS	By MS/MS	By MS/MS	By MS/MS	By MS/MS	By MS/MS	By MS/MS	By MS/MS	30	17.6	17.6	30	17.6	34.2	17.6	17.6	8809900	12669000	13893000	16628000
tr|A0A024QYW3|A0A024QYW3_HUMANProteolipidprotein2(Colonicepithelium-enriched),isoformCRA_aOS=HomosapiensGN=PLP2PE=4SV=1;sp|Q04941|PLP2_HUMANProteolipidprotein2OS=HomosapiensGN=PLP2PE=1SV=1;sp|Q04941-2|PLP2_HUMANIsoform2ofProteolipidprotein2OS=HomosapiensGN=PLP2	tr|A0A024QYW3|A0A024QYW3_HUMAN Proteolipid protein 2 (Colonic epithelium-enriched), isoform CRA_a OS=Homo sapiens GN=PLP2 PE=4 SV=1;sp|Q04941|PLP2_HUMAN Proteolipid protein 2 OS=Homo sapiens GN=PLP2 PE=1 SV=1;sp|Q04941-2|PLP2_HUMAN Isoform 2 of Proteolipid	583480	1261800	1207600	516220	368970	1852800	208630	197850	3	2	2	2	1	1	2	2	2	2	2	2	1	1	2	2	2	16.691	0	4.3714	By MS/MS	By MS/MS	By MS/MS	By MS/MS	By MS/MS	By MS/MS	By MS/MS	By MS/MS	18.4	18.4	18.4	8.6	8.6	18.4	18.4	18.4	2917400	6309200	6038200	2581100
sp|P31930|QCR1_HUMANCytochromeb-c1complexsubunit1,mitochondrialOS=HomosapiensGN=UQCRC1PE=1SV=3;tr|B4DUL5|B4DUL5_HUMANcDNAFLJ51625,highlysimilartoUbiquinol-cytochrome-creductasecomplexcoreproteinI,mitochondrial(EC1.10.2.2)OS=HomosapiensPE=2SV=1;tr|B4DZB9|B4DZB9_HUMANcDNAFLJ52292,highlysimilartoUbiquinol-cytochrome-creductasecomplexcoreproteinI,mitochondrial(EC1.10.2.2)OS=HomosapiensPE=2SV=1	sp|P31930|QCR1_HUMAN Cytochrome b-c1 complex subunit 1, mitochondrial OS=Homo sapiens GN=UQCRC1 PE=1 SV=3;tr|B4DUL5|B4DUL5_HUMAN cDNA FLJ51625, highly similar to Ubiquinol-cytochrome-c reductase complex coreprotein I, mitochondrial (EC 1.10.2.2) OS=Homo sa	580360	1621600	1866900	2123300	797520	2973500	1420800	1378700	3	13	12	13	13	11	15	14	9	13	12	13	13	11	15	14	9	52.645	0	63.918	By MS/MS	By MS/MS	By MS/MS	By MS/MS	By MS/MS	By MS/MS	By MS/MS	By MS/MS	38.8	36	37.7	39.4	26.2	46.2	40.4	24.6	13929000	38919000	44806000	50959000
sp|Q27J81-2|INF2_HUMANIsoform2ofInvertedformin-2OS=HomosapiensGN=INF2;sp|Q27J81|INF2_HUMANInvertedformin-2OS=HomosapiensGN=INF2PE=1SV=2;tr|A0A0A0MQU1|A0A0A0MQU1_HUMANInvertedformin-2(Fragment)OS=HomosapiensGN=INF2PE=1SV=1;sp|Q27J81-3|INF2_HUMANIsoform3ofInvertedformin-2OS=HomosapiensGN=INF2	sp|Q27J81-2|INF2_HUMAN Isoform 2 of Inverted formin-2 OS=Homo sapiens GN=INF2;sp|Q27J81|INF2_HUMAN Inverted formin-2 OS=Homo sapiens GN=INF2 PE=1 SV=2;tr|A0A0A0MQU1|A0A0A0MQU1_HUMAN Inverted formin-2 (Fragment) OS=Homo sapiens GN=INF2 PE=1 SV=1	572360	96301	348020	530510	65560	296550	146920	566020	4	20	5	8	18	6	8	8	9	20	5	8	18	6	8	8	9	134.62	0	81.873	By MS/MS	By MS/MS	By MS/MS	By MS/MS	By MS/MS	By MS/MS	By MS/MS	By MS/MS	26	6.2	12.2	23.8	6.8	10.1	11.9	11.5	29762000	5007600	18097000	27587000
tr|A0A140TA49|A0A140TA49_HUMANComplementC4-AOS=HomosapiensGN=C4APE=1SV=1;tr|A0A140TA44|A0A140TA44_HUMANComplementC4-AOS=HomosapiensGN=C4APE=1SV=1;tr|A0A140TA32|A0A140TA32_HUMANComplementC4-AOS=HomosapiensGN=C4APE=1SV=1;sp|P0C0L4-2|CO4A_HUMANIsoform2ofComplementC4-AOS=HomosapiensGN=C4A;tr|A0A0G2JPR0|A0A0G2JPR0_HUMANComplementC4-AOS=HomosapiensGN=C4APE=1SV=1;sp|P0C0L4|CO4A_HUMANComplementC4-AOS=Hom…	tr|A0A140TA49|A0A140TA49_HUMAN Complement C4-A OS=Homo sapiens GN=C4A PE=1 SV=1;tr|A0A140TA44|A0A140TA44_HUMAN Complement C4-A OS=Homo sapiens GN=C4A PE=1 SV=1;tr|A0A140TA32|A0A140TA32_HUMAN Complement C4-A OS=Homo sapiens GN=C4A PE=1 SV=1;sp|P0C0L4-2|CO4A	570590	74602	266180	424870	30486	77358	29037	184030	20	27	10	12	23	3	6	6	7	0	0	0	0	0	0	0	0	187.79	0	95.931	By MS/MS	By MS/MS	By MS/MS	By MS/MS	By MS/MS	By MS/MS	By MS/MS	By MS/MS	23.6	7.1	8.7	20	2	4.4	4	5.2	44506000	5819000	20762000	33140000
sp|O75061-4|AUXI_HUMANIsoform4ofPutativetyrosine-proteinphosphataseauxilinOS=HomosapiensGN=DNAJC6;sp|O75061|AUXI_HUMANPutativetyrosine-proteinphosphataseauxilinOS=HomosapiensGN=DNAJC6PE=1SV=3;sp|O75061-2|AUXI_HUMANIsoform2ofPutativetyrosine-proteinphosphataseauxilinOS=HomosapiensGN=DNAJC6;sp|O75061-3|AUXI_HUMANIsoform3ofPutativetyrosine-proteinphosphataseauxilinOS=HomosapiensGN=DNAJC6;tr|S4R305|S…	sp|O75061-4|AUXI_HUMAN Isoform 4 of Putative tyrosine-protein phosphatase auxilin OS=Homo sapiens GN=DNAJC6;sp|O75061|AUXI_HUMAN Putative tyrosine-protein phosphatase auxilin OS=Homo sapiens GN=DNAJC6 PE=1 SV=3;sp|O75061-2|AUXI_HUMAN Isoform 2 of Putative	565540	734310	1178800	1486600	230880	2154300	333560	110940	5	18	18	16	19	8	16	14	7	18	18	16	19	8	16	14	7	98.648	0	48.768	By MS/MS	By MS/MS	By MS/MS	By MS/MS	By MS/MS	By MS/MS	By MS/MS	By MS/MS	27.3	23.1	20.8	28.6	9	20.4	18.9	7.1	23187000	30107000	48331000	60951000
sp|P11177-2|ODPB_HUMANIsoform2ofPyruvatedehydrogenaseE1componentsubunitbeta,mitochondrialOS=HomosapiensGN=PDHB;sp|P11177|ODPB_HUMANPyruvatedehydrogenaseE1componentsubunitbeta,mitochondrialOS=HomosapiensGN=PDHBPE=1SV=3;sp|P11177-3|ODPB_HUMANIsoform3ofPyruvatedehydrogenaseE1componentsubunitbeta,mitochondrialOS=HomosapiensGN=PDHB;tr|C9J634|C9J634_HUMANPyruvatedehydrogenaseE1componentsubunitbetaOS=Ho…	sp|P11177-2|ODPB_HUMAN Isoform 2 of Pyruvate dehydrogenase E1 component subunit beta, mitochondrial OS=Homo sapiens GN=PDHB;sp|P11177|ODPB_HUMAN Pyruvate dehydrogenase E1 component subunit beta, mitochondrial OS=Homo sapiens GN=PDHB PE=1 SV=3;sp|P11177-3|O	565400	1108900	1362200	2008200	546560	3219600	675690	351780	6	8	6	4	9	5	11	8	6	8	6	4	9	5	11	8	6	37.2	0	27.651	By MS/MS	By MS/MS	By MS/MS	By MS/MS	By MS/MS	By MS/MS	By MS/MS	By MS/MS	36.7	23.8	10.9	39.9	15.5	47.8	27	17.6	10743000	21068000	25881000	38156000
tr|B3KQT9|B3KQT9_HUMANProteindisulfide-isomeraseOS=HomosapiensPE=2SV=1;tr|V9HVY3|V9HVY3_HUMANProteindisulfide-isomeraseOS=HomosapiensGN=HEL-S-269PE=2SV=1;sp|P30101|PDIA3_HUMANProteindisulfide-isomeraseA3OS=HomosapiensGN=PDIA3PE=1SV=4;tr|B3KQT2|B3KQT2_HUMANProteindisulfide-isomeraseOS=HomosapiensPE=2SV=1;tr|B4DDM1|B4DDM1_HUMANcDNAFLJ59460,highlysimilartoProteindisulfide-isomeraseA3(EC5.3.4.1)OS=Ho…	tr|B3KQT9|B3KQT9_HUMAN Protein disulfide-isomerase OS=Homo sapiens PE=2 SV=1;tr|V9HVY3|V9HVY3_HUMAN Protein disulfide-isomerase OS=Homo sapiens GN=HEL-S-269 PE=2 SV=1;sp|P30101|PDIA3_HUMAN Protein disulfide-isomerase A3 OS=Homo sapiens GN=PDIA3 PE=1 SV=4;t	561930	663010	233520	675370	92038	446190	152000	594990	6	14	11	5	14	5	8	9	11	11	8	3	10	3	5	5	7	54.102	0	28.364	By MS/MS	By MS/MS	By MS/MS	By MS/MS	By MS/MS	By MS/MS	By MS/MS	By MS/MS	37.5	27.5	11	35	11	20	20.6	25.6	15734000	18564000	6538600	18910000
sp|P10909-4|CLUS_HUMANIsoform4ofClusterinOS=HomosapiensGN=CLU;sp|P10909|CLUS_HUMANClusterinOS=HomosapiensGN=CLUPE=1SV=1;sp|P10909-5|CLUS_HUMANIsoform5ofClusterinOS=HomosapiensGN=CLU;sp|P10909-2|CLUS_HUMANIsoform2ofClusterinOS=HomosapiensGN=CLU;sp|P10909-3|CLUS_HUMANIsoform3ofClusterinOS=HomosapiensGN=CLU;tr|E7ERK6|E7ERK6_HUMANClusterin(Fragment)OS=HomosapiensGN=CLUPE=1SV=1;tr|B4DW11|B4DW11_HUMANc…	sp|P10909-4|CLUS_HUMAN Isoform 4 of Clusterin OS=Homo sapiens GN=CLU;sp|P10909|CLUS_HUMAN Clusterin OS=Homo sapiens GN=CLU PE=1 SV=1;sp|P10909-5|CLUS_HUMAN Isoform 5 of Clusterin OS=Homo sapiens GN=CLU;sp|P10909-2|CLUS_HUMAN Isoform 2 of Clusterin OS=Homo	561000	2090900	729950	839470	131570	676260	141580	91142	17	7	7	7	7	4	4	3	3	7	7	7	7	4	4	3	3	48.803	0	32.234	By MS/MS	By MS/MS	By MS/MS	By MS/MS	By MS/MS	By MS/MS	By MS/MS	By MS/MS	24.3	21.2	21.2	24.3	14.4	14.9	12	12	11220000	41817000	14599000	16789000
tr|A8K787|A8K787_HUMANcDNAFLJ75273,highlysimilartoHomosapienssolutecarrierfamily25(mitochondrialcarrier;adeninenucleotidetranslocator),member4,mRNAOS=HomosapiensPE=2SV=1;tr|A0A0S2Z3H3|A0A0S2Z3H3_HUMANSolutecarrierfamily25member4isoform1(Fragment)OS=HomosapiensGN=SLC25A4PE=2SV=1;sp|P12235|ADT1_HUMANADP/ATPtranslocase1OS=HomosapiensGN=SLC25A4PE=1SV=4;tr|V9GYG0|V9GYG0_HUMANADP/ATPtranslocase1OS=Homo…	tr|A8K787|A8K787_HUMAN cDNA FLJ75273, highly similar to Homo sapiens solute carrier family 25 (mitochondrial carrier; adenine nucleotide translocator), member 4, mRNA OS=Homo sapiens PE=2 SV=1;tr|A0A0S2Z3H3|A0A0S2Z3H3_HUMAN Solute carrier family 25 member	557080	3044400	1529100	2031400	589050	5264900	374360	33672	7	13	13	13	14	13	13	13	9	5	5	5	5	5	5	5	4	33.08	0	9.53	By MS/MS	By MS/MS	By MS/MS	By MS/MS	By MS/MS	By MS/MS	By MS/MS	By matching	39.3	39.3	39.3	39.9	39.3	39.3	39.3	30.5	11142000	60888000	30582000	40629000
sp|A5YM72-5|CRNS1_HUMANIsoform5ofCarnosinesynthase1OS=HomosapiensGN=CARNS1;sp|A5YM72-3|CRNS1_HUMANIsoform3ofCarnosinesynthase1OS=HomosapiensGN=CARNS1;sp|A5YM72|CRNS1_HUMANCarnosinesynthase1OS=HomosapiensGN=CARNS1PE=1SV=3;sp|A5YM72-4|CRNS1_HUMANIsoform4ofCarnosinesynthase1OS=HomosapiensGN=CARNS1;tr|B4DHZ3|B4DHZ3_HUMANcDNAFLJ61266OS=HomosapiensPE=2SV=1;sp|A5YM72-2|CRNS1_HUMANIsoform2ofCarnosinesynt…	sp|A5YM72-5|CRNS1_HUMAN Isoform 5 of Carnosine synthase 1 OS=Homo sapiens GN=CARNS1;sp|A5YM72-3|CRNS1_HUMAN Isoform 3 of Carnosine synthase 1 OS=Homo sapiens GN=CARNS1;sp|A5YM72|CRNS1_HUMAN Carnosine synthase 1 OS=Homo sapiens GN=CARNS1 PE=1 SV=3;sp|A5YM72	556580	20218	764030	641100	75628	202590	48311	395530	6	15	2	10	13	6	7	4	7	14	2	9	12	5	6	3	6	101.32	0	42.483	By MS/MS	By MS/MS	By MS/MS	By MS/MS	By MS/MS	By MS/MS	By MS/MS	By MS/MS	23.1	2.8	11.9	18.2	7.8	9.7	5.3	8.9	21707000	788510	29797000	25003000
sp|O14495|PLPP3_HUMANPhospholipidphosphatase3OS=HomosapiensGN=PLPP3PE=1SV=1	sp|O14495|PLPP3_HUMAN Phospholipid phosphatase 3 OS=Homo sapiens GN=PLPP3 PE=1 SV=1	552600	1356500	1387200	1441100	147650	2276800	346870	66548	1	7	6	6	7	4	7	6	4	7	6	6	7	4	7	6	4	35.116	0	14.253	By MS/MS	By MS/MS	By MS/MS	By MS/MS	By MS/MS	By MS/MS	By MS/MS	By matching	26	19.6	19.6	26	11.9	26	19.6	16.1	7736400	18991000	19421000	20176000
sp|O94919|ENDD1_HUMANEndonucleasedomain-containing1proteinOS=HomosapiensGN=ENDOD1PE=1SV=2	sp|O94919|ENDD1_HUMAN Endonuclease domain-containing 1 protein OS=Homo sapiens GN=ENDOD1 PE=1 SV=2	551560	459290	421190	655840	47805	493160	21589	0	1	7	5	5	7	3	4	3	1	7	5	5	7	3	4	3	1	55.016	0	20.868	By MS/MS	By MS/MS	By MS/MS	By MS/MS	By MS/MS	By MS/MS	By MS/MS	By matching	21.2	12	15	21.2	7	13.4	10.8	2.8	13238000	11023000	10109000	15740000
tr|Q53GK6|Q53GK6_HUMANBetaactinvariant(Fragment)OS=HomosapiensPE=2SV=1;tr|Q53G99|Q53G99_HUMANBetaactinvariant(Fragment)OS=HomosapiensPE=2SV=1;tr|Q53G76|Q53G76_HUMANBetaactinvariant(Fragment)OS=HomosapiensPE=2SV=1;tr|Q1KLZ0|Q1KLZ0_HUMANHCG15971,isoformCRA_aOS=HomosapiensGN=PS1TP5BP1PE=1SV=1;sp|P60709|ACTB_HUMANActin,cytoplasmic1OS=HomosapiensGN=ACTBPE=1SV=1;tr|B4E335|B4E335_HUMANcDNAFLJ52842,highl…	tr|Q53GK6|Q53GK6_HUMAN Beta actin variant (Fragment) OS=Homo sapiens PE=2 SV=1;tr|Q53G99|Q53G99_HUMAN Beta actin variant (Fragment) OS=Homo sapiens PE=2 SV=1;tr|Q53G76|Q53G76_HUMAN Beta actin variant (Fragment) OS=Homo sapiens PE=2 SV=1;tr|Q1KLZ0|Q1KLZ0_HU	549060	1088200	563920	702090	245040	525860	468970	996700	81	24	22	21	24	19	22	23	21	1	1	1	1	1	1	1	1	41.722	0	50.159	By MS/MS	By MS/MS	By MS/MS	By MS/MS	By MS/MS	By MS/MS	By MS/MS	By MS/MS	72.3	68.8	70.7	72.3	56.8	68.5	68.8	67.2	10981000	21765000	11278000	14042000
sp|O75891|AL1L1_HUMANCytosolic10-formyltetrahydrofolatedehydrogenaseOS=HomosapiensGN=ALDH1L1PE=1SV=2;sp|O75891-3|AL1L1_HUMANIsoform3ofCytosolic10-formyltetrahydrofolatedehydrogenaseOS=HomosapiensGN=ALDH1L1;tr|Q59G10|Q59G10_HUMANAldehydedehydrogenase1family,memberL1variant(Fragment)OS=HomosapiensPE=2SV=1;tr|Q53HP5|Q53HP5_HUMANFormyltetrahydrofolatedehydrogenaseisoformavariant(Fragment)OS=Homosapie…	sp|O75891|AL1L1_HUMAN Cytosolic 10-formyltetrahydrofolate dehydrogenase OS=Homo sapiens GN=ALDH1L1 PE=1 SV=2;sp|O75891-3|AL1L1_HUMAN Isoform 3 of Cytosolic 10-formyltetrahydrofolate dehydrogenase OS=Homo sapiens GN=ALDH1L1;tr|Q59G10|Q59G10_HUMAN Aldehyde d	542030	890630	1020100	2919600	198790	2103700	793670	558140	24	28	21	21	30	15	28	27	21	28	21	21	30	15	28	27	21	98.828	0	107.36	By MS/MS	By MS/MS	By MS/MS	By MS/MS	By MS/MS	By MS/MS	By MS/MS	By MS/MS	43	29.3	29.3	46.3	19.3	41	37.3	26.7	30354000	49875000	57128000	163500000
sp|Q9UQB3|CTND2_HUMANCatenindelta-2OS=HomosapiensGN=CTNND2PE=1SV=3;tr|E7EPC8|E7EPC8_HUMANCatenindelta-2OS=HomosapiensGN=CTNND2PE=1SV=1;sp|Q9UQB3-2|CTND2_HUMANIsoform2ofCatenindelta-2OS=HomosapiensGN=CTNND2;tr|B4DRK2|B4DRK2_HUMANCatenindelta-2OS=HomosapiensGN=CTNND2PE=1SV=1;tr|B3KXF4|B3KXF4_HUMANcDNAFLJ45324fis,cloneBRHIP3006449,highlysimilartoCatenindelta-2OS=HomosapiensPE=2SV=1;tr|D6R9A8|D6R9A8_…	sp|Q9UQB3|CTND2_HUMAN Catenin delta-2 OS=Homo sapiens GN=CTNND2 PE=1 SV=3;tr|E7EPC8|E7EPC8_HUMAN Catenin delta-2 OS=Homo sapiens GN=CTNND2 PE=1 SV=1;sp|Q9UQB3-2|CTND2_HUMAN Isoform 2 of Catenin delta-2 OS=Homo sapiens GN=CTNND2;tr|B4DRK2|B4DRK2_HUMAN Caten	540740	1867900	399930	635010	159160	702810	346510	583010	8	22	21	12	21	12	17	20	17	3	3	3	3	3	3	4	3	132.65	0	78.12	By MS/MS	By MS/MS	By MS/MS	By MS/MS	By MS/MS	By MS/MS	By MS/MS	By MS/MS	23.5	24.2	13.1	23.1	12.4	17.8	21.1	17.1	31904000	110210000	23596000	37465000
tr|C9JG41|C9JG41_HUMANIntegralmembraneprotein2C(Fragment)OS=HomosapiensGN=ITM2CPE=1SV=1;sp|Q9NQX7-3|ITM2C_HUMANIsoform3ofIntegralmembraneprotein2COS=HomosapiensGN=ITM2C;tr|A0A024R466|A0A024R466_HUMANIntegralmembraneprotein2C,isoformCRA_aOS=HomosapiensGN=ITM2CPE=4SV=1;sp|Q9NQX7|ITM2C_HUMANIntegralmembraneprotein2COS=HomosapiensGN=ITM2CPE=1SV=1;tr|B4E028|B4E028_HUMANcDNAFLJ54212,highlysimilartoInte…	tr|C9JG41|C9JG41_HUMAN Integral membrane protein 2C (Fragment) OS=Homo sapiens GN=ITM2C PE=1 SV=1;sp|Q9NQX7-3|ITM2C_HUMAN Isoform 3 of Integral membrane protein 2C OS=Homo sapiens GN=ITM2C;tr|A0A024R466|A0A024R466_HUMAN Integral membrane protein 2C, isofor	540300	750560	788860	1224500	0	918320	587670	757210	10	4	4	4	5	0	4	4	3	4	4	4	5	0	4	4	3	20.056	0	14.916	By MS/MS	By MS/MS	By MS/MS	By MS/MS		By MS/MS	By MS/MS	By MS/MS	35.6	35.6	35.6	41.7	0	37.2	37.2	29.4	5943200	8256100	8677500	13470000
tr|M0QZN2|M0QZN2_HUMAN40SribosomalproteinS5OS=HomosapiensGN=RPS5PE=1SV=1;tr|M0R0F0|M0R0F0_HUMAN40SribosomalproteinS5(Fragment)OS=HomosapiensGN=RPS5PE=1SV=1;tr|Q53G25|Q53G25_HUMANRibosomalproteinS5variant(Fragment)OS=HomosapiensPE=2SV=1;tr|A0A024R4Q8|A0A024R4Q8_HUMANRibosomalproteinS5,isoformCRA_aOS=HomosapiensGN=RPS5PE=3SV=1;sp|P46782|RS5_HUMAN40SribosomalproteinS5OS=HomosapiensGN=RPS5PE=1SV=4;tr…	tr|M0QZN2|M0QZN2_HUMAN 40S ribosomal protein S5 OS=Homo sapiens GN=RPS5 PE=1 SV=1;tr|M0R0F0|M0R0F0_HUMAN 40S ribosomal protein S5 (Fragment) OS=Homo sapiens GN=RPS5 PE=1 SV=1;tr|Q53G25|Q53G25_HUMAN Ribosomal protein S5 variant (Fragment) OS=Homo sapiens PE	538420	328170	205830	1251900	137320	690020	328130	72889	6	3	2	1	3	1	2	2	1	3	2	1	3	1	2	2	1	14.763	0	31.768	By MS/MS	By MS/MS	By MS/MS	By MS/MS	By MS/MS	By MS/MS	By MS/MS	By matching	33.6	22.4	9.7	33.6	12.7	22.4	22.4	9.7	3230500	1969000	1235000	7511200
tr|E7ESP9|E7ESP9_HUMANNeurofilamentmediumpolypeptideOS=HomosapiensGN=NEFMPE=1SV=1;tr|A5YM63|A5YM63_HUMANNEFMproteinOS=HomosapiensGN=NEFMPE=2SV=1;sp|P07197|NFM_HUMANNeurofilamentmediumpolypeptideOS=HomosapiensGN=NEFMPE=1SV=3;tr|E7EMV2|E7EMV2_HUMANNeurofilamentmediumpolypeptideOS=HomosapiensGN=NEFMPE=1SV=1;tr|B4DJT7|B4DJT7_HUMANcDNAFLJ56511,highlysimilartoNeurofilamenttripletMproteinOS=HomosapiensP…	tr|E7ESP9|E7ESP9_HUMAN Neurofilament medium polypeptide OS=Homo sapiens GN=NEFM PE=1 SV=1;tr|A5YM63|A5YM63_HUMAN NEFM protein OS=Homo sapiens GN=NEFM PE=2 SV=1;sp|P07197|NFM_HUMAN Neurofilament medium polypeptide OS=Homo sapiens GN=NEFM PE=1 SV=3;tr|E7EMV2	536490	224720	851030	696650	225180	579780	122670	206520	7	20	12	15	20	14	16	12	11	17	9	12	16	11	12	8	9	98.38	0	50.576	By MS/MS	By MS/MS	By MS/MS	By MS/MS	By MS/MS	By MS/MS	By MS/MS	By MS/MS	30.3	15.2	19.3	28.1	17	22.1	14	13.7	24142000	10113000	38296000	31349000
tr|B4E106|B4E106_HUMANcDNAFLJ53399,highlysimilartoMonocarboxylatetransporter1OS=HomosapiensPE=2SV=1	tr|B4E106|B4E106_HUMAN cDNA FLJ53399, highly similar to Monocarboxylate transporter 1 OS=Homo sapiens PE=2 SV=1	536440	1184900	1197700	927830	422550	914090	90673	180870	1	4	4	4	4	3	3	3	2	1	1	1	1	1	1	1	1	51.878	0	11.93	By MS/MS	By MS/MS	By MS/MS	By MS/MS	By MS/MS	By MS/MS	By MS/MS	By MS/MS	11.7	11.7	11.7	11.7	11	11	11	6.9	8046700	17773000	17966000	13917000
sp|O95782-2|AP2A1_HUMANIsoformBofAP-2complexsubunitalpha-1OS=HomosapiensGN=AP2A1;sp|O95782|AP2A1_HUMANAP-2complexsubunitalpha-1OS=HomosapiensGN=AP2A1PE=1SV=3;tr|Q8N9K4|Q8N9K4_HUMANcDNAFLJ36998fis,cloneBRACE2007295,highlysimilartoALPHA-ADAPTINAOS=HomosapiensPE=2SV=1;tr|B4DXJ6|B4DXJ6_HUMANcDNAFLJ61453,highlysimilartoAdapter-relatedproteincomplex2alpha-1subunitOS=HomosapiensPE=2SV=1	sp|O95782-2|AP2A1_HUMAN Isoform B of AP-2 complex subunit alpha-1 OS=Homo sapiens GN=AP2A1;sp|O95782|AP2A1_HUMAN AP-2 complex subunit alpha-1 OS=Homo sapiens GN=AP2A1 PE=1 SV=3	535950	1710200	2066100	1993500	475010	2982100	666960	326650	4	24	25	20	24	18	30	25	16	15	17	14	17	12	20	16	8	105.36	0	54.861	By MS/MS	By MS/MS	By MS/MS	By MS/MS	By MS/MS	By MS/MS	By MS/MS	By MS/MS	29	28.1	23.5	29.5	19.2	38.6	29.6	17	28405000	90640000	109500000	105660000
sp|Q9H936|GHC1_HUMANMitochondrialglutamatecarrier1OS=HomosapiensGN=SLC25A22PE=1SV=1;tr|E9PJH7|E9PJH7_HUMANMitochondrialglutamatecarrier1(Fragment)OS=HomosapiensGN=SLC25A22PE=1SV=5;tr|A0A0D9SEI9|A0A0D9SEI9_HUMANMitochondrialglutamatecarrier1(Fragment)OS=HomosapiensGN=SLC25A22PE=1SV=1;tr|A0A0D9SFE1|A0A0D9SFE1_HUMANMitochondrialglutamatecarrier1(Fragment)OS=HomosapiensGN=SLC25A22PE=1SV=1;tr|A0A024RC…	sp|Q9H936|GHC1_HUMAN Mitochondrial glutamate carrier 1 OS=Homo sapiens GN=SLC25A22 PE=1 SV=1;tr|E9PJH7|E9PJH7_HUMAN Mitochondrial glutamate carrier 1 (Fragment) OS=Homo sapiens GN=SLC25A22 PE=1 SV=5;tr|A0A0D9SEI9|A0A0D9SEI9_HUMAN Mitochondrial glutamate ca	535720	6845400	3870300	3260600	1030900	7183300	561320	155940	21	6	13	10	9	9	9	7	4	6	13	10	9	9	9	7	4	34.47	0	46.57	By MS/MS	By MS/MS	By MS/MS	By MS/MS	By MS/MS	By MS/MS	By MS/MS	By MS/MS	26.3	48.3	42.7	32.5	31.9	32.2	28.8	13.6	9107200	116370000	65795000	55430000
tr|Q53G58|Q53G58_HUMANCoronin(Fragment)OS=HomosapiensPE=2SV=1;tr|B3KN06|B3KN06_HUMANCoroninOS=HomosapiensPE=2SV=1;tr|A0A024RBI5|A0A024RBI5_HUMANCoroninOS=HomosapiensGN=CORO1CPE=3SV=1;sp|Q9ULV4|COR1C_HUMANCoronin-1COS=HomosapiensGN=CORO1CPE=1SV=1;sp|Q9ULV4-2|COR1C_HUMANIsoform2ofCoronin-1COS=HomosapiensGN=CORO1C;tr|Q59EA2|Q59EA2_HUMANCoronin(Fragment)OS=HomosapiensPE=2SV=1;sp|Q9ULV4-3|COR1C_HUMANI…	tr|Q53G58|Q53G58_HUMAN Coronin (Fragment) OS=Homo sapiens PE=2 SV=1;tr|B3KN06|B3KN06_HUMAN Coronin OS=Homo sapiens PE=2 SV=1;tr|A0A024RBI5|A0A024RBI5_HUMAN Coronin OS=Homo sapiens GN=CORO1C PE=3 SV=1;sp|Q9ULV4|COR1C_HUMAN Coronin-1C OS=Homo sapiens GN=CORO	534740	498030	735010	1068200	130640	946070	193890	90499	18	9	6	7	8	7	8	5	3	9	6	7	8	7	8	5	3	53.28	0	38.091	By MS/MS	By MS/MS	By MS/MS	By MS/MS	By MS/MS	By MS/MS	By MS/MS	By MS/MS	27	13.7	15.8	20.9	16.5	20.9	10.8	6.3	10160000	9462600	13965000	20295000
sp|P45974-2|UBP5_HUMANIsoformShortofUbiquitincarboxyl-terminalhydrolase5OS=HomosapiensGN=USP5;tr|A0A140VJZ1|A0A140VJZ1_HUMANUbiquitinylhydrolase1OS=HomosapiensPE=2SV=1;sp|P45974|UBP5_HUMANUbiquitincarboxyl-terminalhydrolase5OS=HomosapiensGN=USP5PE=1SV=2;tr|F5H571|F5H571_HUMANUbiquitincarboxyl-terminalhydrolase5(Fragment)OS=HomosapiensGN=USP5PE=1SV=1;tr|H7C5J3|H7C5J3_HUMANUbiquitincarboxyl-termina…	sp|P45974-2|UBP5_HUMAN Isoform Short of Ubiquitin carboxyl-terminal hydrolase 5 OS=Homo sapiens GN=USP5;tr|A0A140VJZ1|A0A140VJZ1_HUMAN Ubiquitinyl hydrolase 1 OS=Homo sapiens PE=2 SV=1;sp|P45974|UBP5_HUMAN Ubiquitin carboxyl-terminal hydrolase 5 OS=Homo sa	534060	614990	733330	1043400	168890	1228900	312730	580360	8	16	12	12	17	7	16	13	11	16	12	12	17	7	16	13	11	93.307	0	102.56	By MS/MS	By MS/MS	By MS/MS	By MS/MS	By MS/MS	By MS/MS	By MS/MS	By MS/MS	26.8	16.6	16.6	28.6	8.7	24.3	18.6	13.7	21362000	24600000	29333000	41735000
tr|I4AY87|I4AY87_HUMANMacrophagemigrationinhibitoryfactor(Fragment)OS=HomosapiensGN=MIFPE=1SV=1;sp|P14174|MIF_HUMANMacrophagemigrationinhibitoryfactorOS=HomosapiensGN=MIFPE=1SV=4	tr|I4AY87|I4AY87_HUMAN Macrophage migration inhibitory factor (Fragment) OS=Homo sapiens GN=MIF PE=1 SV=1;sp|P14174|MIF_HUMAN Macrophage migration inhibitory factor OS=Homo sapiens GN=MIF PE=1 SV=4	531690	401730	698210	1032300	59043	1209300	345310	0	2	1	1	1	1	1	1	1	0	1	1	1	1	1	1	1	0	12.476	0.0032081	1.6359	By MS/MS	By MS/MS	By matching	By MS/MS	By matching	By MS/MS	By matching		7.8	7.8	7.8	7.8	7.8	7.8	7.8	0	2658500	2008700	3491000	5161700
sp|P07737|PROF1_HUMANProfilin-1OS=HomosapiensGN=PFN1PE=1SV=2;tr|K7EJ44|K7EJ44_HUMANProfilinOS=HomosapiensGN=PFN1PE=1SV=1;tr|I3L3D5|I3L3D5_HUMANProfilin(Fragment)OS=HomosapiensGN=PFN1PE=1SV=1;CON__P02584	sp|P07737|PROF1_HUMAN Profilin-1 OS=Homo sapiens GN=PFN1 PE=1 SV=2;tr|K7EJ44|K7EJ44_HUMAN Profilin OS=Homo sapiens GN=PFN1 PE=1 SV=1;tr|I3L3D5|I3L3D5_HUMAN Profilin (Fragment) OS=Homo sapiens GN=PFN1 PE=1 SV=1	526300	544870	1330400	615550	331810	774080	94256	1478500	4	4	3	3	4	3	4	2	4	4	3	3	4	3	4	2	4	15.054	0	12.394	By MS/MS	By MS/MS	By MS/MS	By MS/MS	By matching	By MS/MS	By MS/MS	By MS/MS	40	28.6	28.6	40	28.6	38.6	18.6	40	4736700	4903900	11973000	5539900
sp|Q16720-3|AT2B3_HUMANIsoformZAofPlasmamembranecalcium-transportingATPase3OS=HomosapiensGN=ATP2B3;sp|Q16720-2|AT2B3_HUMANIsoformXAofPlasmamembranecalcium-transportingATPase3OS=HomosapiensGN=ATP2B3	sp|Q16720-3|AT2B3_HUMAN Isoform ZA of Plasma membrane calcium-transporting ATPase 3 OS=Homo sapiens GN=ATP2B3;sp|Q16720-2|AT2B3_HUMAN Isoform XA of Plasma membrane calcium-transporting ATPase 3 OS=Homo sapiens GN=ATP2B3	525550	2939500	2105400	3103600	705290	6045700	400830	97202	2	23	33	28	30	24	30	23	13	0	0	0	0	0	1	0	0	127.07	0	95.769	By MS/MS	By MS/MS	By MS/MS	By MS/MS	By MS/MS	By MS/MS	By MS/MS	By MS/MS	24.4	32	27.6	29.8	23.7	35.5	24.3	12.3	24701000	138150000	98955000	145870000
tr|B7Z8N7|B7Z8N7_HUMANcDNAFLJ55440,highlysimilartoMusmusculuscytoplasmicFMR1interactingprotein2(Cyfip2),mRNAOS=HomosapiensPE=2SV=1;sp|Q96F07|CYFP2_HUMANCytoplasmicFMR1-interactingprotein2OS=HomosapiensGN=CYFIP2PE=1SV=2;tr|A0A087WVE1|A0A087WVE1_HUMANCytoplasmicFMR1-interactingprotein2(Fragment)OS=HomosapiensGN=CYFIP2PE=1SV=1;tr|A0A087WTQ3|A0A087WTQ3_HUMANCytoplasmicFMR1-interactingprotein2(Fragmen…	tr|B7Z8N7|B7Z8N7_HUMAN cDNA FLJ55440, highly similar to Mus musculus cytoplasmic FMR1 interacting protein 2 (Cyfip2), mRNA OS=Homo sapiens PE=2 SV=1;sp|Q96F07|CYFP2_HUMAN Cytoplasmic FMR1-interacting protein 2 OS=Homo sapiens GN=CYFIP2 PE=1 SV=2	522930	1385700	1180400	1766200	406940	2434000	408500	175000	5	27	23	20	27	16	29	23	12	0	0	0	0	0	0	0	0	142.59	0	99.419	By MS/MS	By MS/MS	By MS/MS	By MS/MS	By MS/MS	By MS/MS	By MS/MS	By MS/MS	25.3	20.6	18.1	24.3	14.8	26.7	20.9	10.1	34514000	91459000	77909000	116570000
tr|V9HW80|V9HW80_HUMANEpididymisluminalprotein220OS=HomosapiensGN=HEL-S-70PE=1SV=1;sp|P55072|TERA_HUMANTransitionalendoplasmicreticulumATPaseOS=HomosapiensGN=VCPPE=1SV=4;tr|Q96IF9|Q96IF9_HUMANVCPprotein(Fragment)OS=HomosapiensGN=VCPPE=2SV=2;tr|Q0IIN5|Q0IIN5_HUMANVCPproteinOS=HomosapiensGN=VCPPE=2SV=1;tr|Q9HAP1|Q9HAP1_HUMANValosin-containingprotein(Fragment)OS=HomosapiensGN=VCPPE=2SV=1;tr|Q9NTC4|Q…	tr|V9HW80|V9HW80_HUMAN Epididymis luminal protein 220 OS=Homo sapiens GN=HEL-S-70 PE=1 SV=1;sp|P55072|TERA_HUMAN Transitional endoplasmic reticulum ATPase OS=Homo sapiens GN=VCP PE=1 SV=4;tr|Q96IF9|Q96IF9_HUMAN VCP protein (Fragment) OS=Homo sapiens GN=VCP	520230	598610	727340	999320	88735	793700	325920	450010	9	20	16	14	21	9	14	14	13	20	16	14	21	9	13	13	12	89.321	0	141.18	By MS/MS	By MS/MS	By MS/MS	By MS/MS	By MS/MS	By MS/MS	By MS/MS	By MS/MS	33.1	27	24.7	33.7	13.2	23.3	20.3	19.4	23410000	26938000	32730000	44969000
tr|Q5JR95|Q5JR95_HUMAN40SribosomalproteinS8OS=HomosapiensGN=RPS8PE=1SV=1;tr|Q5JR94|Q5JR94_HUMAN40SribosomalproteinS8OS=HomosapiensGN=RPS8PE=2SV=1;sp|P62241|RS8_HUMAN40SribosomalproteinS8OS=HomosapiensGN=RPS8PE=1SV=2;tr|Q9BS10|Q9BS10_HUMANSimilartoribosomalproteinS8(Fragment)OS=HomosapiensPE=2SV=1	tr|Q5JR95|Q5JR95_HUMAN 40S ribosomal protein S8 OS=Homo sapiens GN=RPS8 PE=1 SV=1;tr|Q5JR94|Q5JR94_HUMAN 40S ribosomal protein S8 OS=Homo sapiens GN=RPS8 PE=2 SV=1;sp|P62241|RS8_HUMAN 40S ribosomal protein S8 OS=Homo sapiens GN=RPS8 PE=1 SV=2;tr|Q9BS10|Q9B	519850	2093300	1430300	1131600	462660	2662300	116630	37409	4	5	6	6	5	5	7	2	1	5	6	6	5	5	7	2	1	21.879	0	53.76	By MS/MS	By MS/MS	By MS/MS	By MS/MS	By MS/MS	By MS/MS	By MS/MS	By matching	29.8	33	35.6	29.8	27.1	42	10.6	6.9	4158800	16746000	11443000	9052600
tr|Q5QNZ2|Q5QNZ2_HUMANATPsynthaseF(0)complexsubunitB1,mitochondrialOS=HomosapiensGN=ATP5F1PE=1SV=1;tr|Q53GB3|Q53GB3_HUMANATPsynthase,H+transporting,mitochondrialF0complex,subunitbisoform1variant(Fragment)OS=HomosapiensPE=2SV=1;tr|Q08ET0|Q08ET0_HUMANCellproliferation-inducingprotein47OS=HomosapiensGN=hCG_39985PE=2SV=1;tr|A8K4W2|A8K4W2_HUMANcDNAFLJ78635,highlysimilartoHomosapiensATPsynthase,H+trans…	tr|Q5QNZ2|Q5QNZ2_HUMAN ATP synthase F(0) complex subunit B1, mitochondrial OS=Homo sapiens GN=ATP5F1 PE=1 SV=1;tr|Q53GB3|Q53GB3_HUMAN ATP synthase, H+ transporting, mitochondrial F0 complex, subunit b isoform 1 variant (Fragment) OS=Homo sapiens PE=2 SV=1;	513140	1732900	1559600	1834100	563700	2228500	665370	80290	5	6	6	6	7	4	6	5	2	6	6	6	7	4	6	5	2	22.275	0	56.428	By MS/MS	By MS/MS	By MS/MS	By MS/MS	By MS/MS	By MS/MS	By MS/MS	By matching	28.7	28.7	28.7	34.9	20.5	30.3	26.2	12.8	6157600	20795000	18715000	22009000
sp|Q8N3E9|PLCD3_HUMAN1-phosphatidylinositol4,5-bisphosphatephosphodiesterasedelta-3OS=HomosapiensGN=PLCD3PE=1SV=3;tr|D3DX63|D3DX63_HUMANPhosphoinositidephospholipaseCOS=HomosapiensGN=PLCD3PE=4SV=1;tr|H0YGF8|H0YGF8_HUMAN1-phosphatidylinositol4,5-bisphosphatephosphodiesterasedelta-3(Fragment)OS=HomosapiensGN=PLCD3PE=1SV=1;tr|F5GXC1|F5GXC1_HUMAN1-phosphatidylinositol4,5-bisphosphatephosphodiesterase…	sp|Q8N3E9|PLCD3_HUMAN 1-phosphatidylinositol 4,5-bisphosphate phosphodiesterase delta-3 OS=Homo sapiens GN=PLCD3 PE=1 SV=3	512130	63833	171090	367230	46219	180250	17245	17760	5	15	4	5	12	2	5	2	2	15	4	5	12	2	5	2	2	89.257	0	40.346	By MS/MS	By matching	By MS/MS	By MS/MS	By MS/MS	By MS/MS	By matching	By MS/MS	30.3	5.6	7.5	24.5	1.9	9.3	4.4	2.9	18949000	2361800	6330400	13588000
tr|B2ZZ89|B2ZZ89_HUMANSpectrinbetachainOS=HomosapiensGN=SPTBN1PE=2SV=1;sp|Q01082|SPTB2_HUMANSpectrinbetachain,non-erythrocytic1OS=HomosapiensGN=SPTBN1PE=1SV=2;tr|A0A087WUZ3|A0A087WUZ3_HUMANSpectrinbetachainOS=HomosapiensGN=SPTBN1PE=1SV=1;tr|D6W5C0|D6W5C0_HUMANSpectrinbetachainOS=HomosapiensGN=SPTBN1PE=3SV=1;sp|Q01082-2|SPTB2_HUMANIsoformShortofSpectrinbetachain,non-erythrocytic1OS=HomosapiensGN=S…	tr|B2ZZ89|B2ZZ89_HUMAN Spectrin beta chain OS=Homo sapiens GN=SPTBN1 PE=2 SV=1;sp|Q01082|SPTB2_HUMAN Spectrin beta chain, non-erythrocytic 1 OS=Homo sapiens GN=SPTBN1 PE=1 SV=2;tr|A0A087WUZ3|A0A087WUZ3_HUMAN Spectrin beta chain OS=Homo sapiens GN=SPTBN1 PE	511900	806930	549550	884750	141910	744950	262930	535530	16	51	45	32	44	24	34	31	33	2	3	2	1	2	1	2	2	274.61	0	256.42	By MS/MS	By MS/MS	By MS/MS	By MS/MS	By MS/MS	By MS/MS	By MS/MS	By MS/MS	27.9	23.3	16.8	25	12.5	19.1	15.3	16.6	72690000	114580000	78036000	125630000
sp|P55011-3|S12A2_HUMANIsoform2ofSolutecarrierfamily12member2OS=HomosapiensGN=SLC12A2;tr|Q53ZR1|Q53ZR1_HUMANBumetanide-sensitiveNa-K-ClcotransporterOS=HomosapiensGN=SLC12A2PE=2SV=1;sp|P55011|S12A2_HUMANSolutecarrierfamily12member2OS=HomosapiensGN=SLC12A2PE=1SV=1;tr|G3XAL9|G3XAL9_HUMANSolutecarrierfamily12(Sodium/potassium/chloridetransporters),member2,isoformCRA_aOS=HomosapiensGN=SLC12A2PE=1SV=1;…	sp|P55011-3|S12A2_HUMAN Isoform 2 of Solute carrier family 12 member 2 OS=Homo sapiens GN=SLC12A2;tr|Q53ZR1|Q53ZR1_HUMAN Bumetanide-sensitive Na-K-Cl cotransporter OS=Homo sapiens GN=SLC12A2 PE=2 SV=1;sp|P55011|S12A2_HUMAN Solute carrier family 12 member 2	509340	334810	1094300	581350	111910	397250	38886	9284.1	6	15	12	16	12	9	9	5	2	15	12	16	12	9	9	5	2	129.68	0	62.77	By MS/MS	By MS/MS	By MS/MS	By MS/MS	By MS/MS	By MS/MS	By MS/MS	By matching	21.1	16.9	18.6	17.3	11.8	12.9	7.9	2.7	24448000	16071000	52528000	27905000
tr|Q6LEU0|Q6LEU0_HUMANSTX12protein(Fragment)OS=HomosapiensGN=STX12PE=2SV=1;sp|Q86Y82|STX12_HUMANSyntaxin-12OS=HomosapiensGN=STX12PE=1SV=1;tr|B1AJQ6|B1AJQ6_HUMANSyntaxin-12(Fragment)OS=HomosapiensGN=STX12PE=1SV=2;tr|B4DSZ1|B4DSZ1_HUMANcDNAFLJ54877,highlysimilartoSyntaxin-12OS=HomosapiensPE=2SV=1;tr|B0AZT9|B0AZT9_HUMANcDNA,FLJ79529,highlysimilartoSyntaxin-12OS=HomosapiensPE=2SV=1	tr|Q6LEU0|Q6LEU0_HUMAN STX12 protein (Fragment) OS=Homo sapiens GN=STX12 PE=2 SV=1;sp|Q86Y82|STX12_HUMAN Syntaxin-12 OS=Homo sapiens GN=STX12 PE=1 SV=1;tr|B1AJQ6|B1AJQ6_HUMAN Syntaxin-12 (Fragment) OS=Homo sapiens GN=STX12 PE=1 SV=2;tr|B4DSZ1|B4DSZ1_HUMAN	502000	2623300	1465500	1316200	81420	3173700	1453200	308680	5	5	5	5	5	2	5	6	4	5	5	5	5	2	5	6	4	30.878	0	30.244	By MS/MS	By MS/MS	By MS/MS	By MS/MS	By matching	By MS/MS	By MS/MS	By MS/MS	23.4	23.4	23.4	23.4	9.7	26	28.6	20.8	6024000	31479000	17586000	15795000
tr|V9HW04|V9HW04_HUMANSerine/threonine-proteinphosphataseOS=HomosapiensGN=HEL-S-80pPE=2SV=1;sp|P62140|PP1B_HUMANSerine/threonine-proteinphosphatasePP1-betacatalyticsubunitOS=HomosapiensGN=PPP1CBPE=1SV=3;tr|B7ZB67|B7ZB67_HUMANSerine/threonine-proteinphosphataseOS=HomosapiensPE=2SV=1;tr|B4DJ75|B4DJ75_HUMANSerine/threonine-proteinphosphataseOS=HomosapiensPE=2SV=1;tr|C9J9S3|C9J9S3_HUMANSerine/threoni…	tr|V9HW04|V9HW04_HUMAN Serine/threonine-protein phosphatase OS=Homo sapiens GN=HEL-S-80p PE=2 SV=1;sp|P62140|PP1B_HUMAN Serine/threonine-protein phosphatase PP1-beta catalytic subunit OS=Homo sapiens GN=PPP1CB PE=1 SV=3;tr|B7ZB67|B7ZB67_HUMAN Serine/threon	501390	137120	47270	847300	20081	144290	320580	523900	8	8	3	1	8	1	3	6	6	3	2	1	3	1	0	3	3	37.186	0	18.878	By MS/MS	By MS/MS	By MS/MS	By MS/MS	By matching	By MS/MS	By MS/MS	By MS/MS	30.6	10.7	4	30.6	4	8.6	20.5	20.8	8523600	2331100	803590	14404000
sp|Q9UQ03-2|COR2B_HUMANIsoform2ofCoronin-2BOS=HomosapiensGN=CORO2B;sp|Q9UQ03|COR2B_HUMANCoronin-2BOS=HomosapiensGN=CORO2BPE=1SV=4;tr|B3KWB4|B3KWB4_HUMANcDNAFLJ42721fis,cloneBRAMY4000229,highlysimilartoCoronin-2BOS=HomosapiensPE=2SV=1	sp|Q9UQ03-2|COR2B_HUMAN Isoform 2 of Coronin-2B OS=Homo sapiens GN=CORO2B;sp|Q9UQ03|COR2B_HUMAN Coronin-2B OS=Homo sapiens GN=CORO2B PE=1 SV=4	497400	1141900	960430	1042700	300010	1044700	160850	56087	3	10	8	9	11	7	9	6	4	10	8	9	11	7	9	6	4	54.392	0	25.499	By MS/MS	By MS/MS	By MS/MS	By MS/MS	By MS/MS	By MS/MS	By MS/MS	By matching	26.7	18.1	19.6	29.3	14.1	22.9	12	7.2	11938000	27405000	23050000	25026000
tr|E5L8F5|E5L8F5_HUMANLeucinezipperdownregulatedincancervariantOS=HomosapiensGN=LDOC1PE=2SV=1;sp|O95751|LDOC1_HUMANProteinLDOC1OS=HomosapiensGN=LDOC1PE=1SV=1	tr|E5L8F5|E5L8F5_HUMAN Leucine zipper downregulated in cancer variant OS=Homo sapiens GN=LDOC1 PE=2 SV=1;sp|O95751|LDOC1_HUMAN Protein LDOC1 OS=Homo sapiens GN=LDOC1 PE=1 SV=1	494520	397290	0	506170	0	0	0	0	2	1	1	0	1	0	0	0	0	1	1	0	1	0	0	0	0	5.1852	0.0074923	1.3996	By MS/MS	By matching		By MS/MS					31.8	31.8	0	31.8	0	0	0	0	989040	794570	0	1012300
tr|V9HW89|V9HW89_HUMANEpididymissecretoryspermbindingproteinLi95nOS=HomosapiensGN=HEL-S-95nPE=2SV=1;sp|Q00796|DHSO_HUMANSorbitoldehydrogenaseOS=HomosapiensGN=SORDPE=1SV=4;tr|B4DKI2|B4DKI2_HUMANcDNAFLJ60282,highlysimilartoSorbitoldehydrogenase(EC1.1.1.14)OS=HomosapiensPE=2SV=1;tr|H0YLA4|H0YLA4_HUMANSorbitoldehydrogenaseOS=HomosapiensGN=SORDPE=1SV=1;sp|Q00796-2|DHSO_HUMANIsoform2ofSorbitoldehydroge…	tr|V9HW89|V9HW89_HUMAN Epididymis secretory sperm binding protein Li 95n OS=Homo sapiens GN=HEL-S-95n PE=2 SV=1;sp|Q00796|DHSO_HUMAN Sorbitol dehydrogenase OS=Homo sapiens GN=SORD PE=1 SV=4;tr|B4DKI2|B4DKI2_HUMAN cDNA FLJ60282, highly similar to Sorbitol d	493290	319490	221630	419050	38457	216580	52377	22862	6	10	4	4	8	2	3	3	2	10	4	4	8	2	3	3	2	38.311	0	27.795	By MS/MS	By MS/MS	By MS/MS	By MS/MS	By matching	By MS/MS	By matching	By MS/MS	46.2	14.8	14.8	36.7	4.5	10.1	10.1	7.6	10359000	6709200	4654200	8800100
tr|A0A140VK39|A0A140VK39_HUMANProteinphosphatasemethylesterase1OS=HomosapiensPE=2SV=1;sp|Q9Y570|PPME1_HUMANProteinphosphatasemethylesterase1OS=HomosapiensGN=PPME1PE=1SV=3;sp|Q9Y570-4|PPME1_HUMANIsoform4ofProteinphosphatasemethylesterase1OS=HomosapiensGN=PPME1;sp|Q9Y570-2|PPME1_HUMANIsoform2ofProteinphosphatasemethylesterase1OS=HomosapiensGN=PPME1;sp|Q9Y570-3|PPME1_HUMANIsoform3ofProteinphosphatas…	tr|A0A140VK39|A0A140VK39_HUMAN Protein phosphatase methylesterase 1 OS=Homo sapiens PE=2 SV=1;sp|Q9Y570|PPME1_HUMAN Protein phosphatase methylesterase 1 OS=Homo sapiens GN=PPME1 PE=1 SV=3;sp|Q9Y570-4|PPME1_HUMAN Isoform 4 of Protein phosphatase methylester	491740	226710	154340	663540	36403	532890	115780	82334	5	6	5	3	6	1	5	5	3	6	5	3	6	1	5	5	3	42.315	0	12.553	By MS/MS	By MS/MS	By MS/MS	By MS/MS	By matching	By MS/MS	By MS/MS	By matching	20.2	16.3	8.5	20.2	1.8	16.3	16.3	7	8359500	3854100	2623700	11280000
sp|O43761|SNG3_HUMANSynaptogyrin-3OS=HomosapiensGN=SYNGR3PE=1SV=2;tr|Q96L30|Q96L30_HUMANSYNGR3proteinOS=HomosapiensGN=SYNGR3PE=1SV=1;tr|H3BNA6|H3BNA6_HUMANSynaptogyrin-3(Fragment)OS=HomosapiensGN=SYNGR3PE=1SV=8	sp|O43761|SNG3_HUMAN Synaptogyrin-3 OS=Homo sapiens GN=SYNGR3 PE=1 SV=2;tr|Q96L30|Q96L30_HUMAN SYNGR3 protein OS=Homo sapiens GN=SYNGR3 PE=1 SV=1	484460	15450000	6140600	3639000	2635400	9280000	908570	221970	3	4	6	5	5	5	5	5	2	4	6	5	5	5	5	5	2	24.555	0	10.846	By MS/MS	By MS/MS	By MS/MS	By MS/MS	By MS/MS	By MS/MS	By MS/MS	By MS/MS	20.1	27.5	24.5	24.5	24.5	24.5	24.5	11.8	4844600	154500000	61406000	36390000
tr|Q53YD7|Q53YD7_HUMANEEF1GproteinOS=HomosapiensGN=EEF1GPE=2SV=1;sp|P26641|EF1G_HUMANElongationfactor1-gammaOS=HomosapiensGN=EEF1GPE=1SV=3;sp|P26641-2|EF1G_HUMANIsoform2ofElongationfactor1-gammaOS=HomosapiensGN=EEF1G;tr|B4DUP0|B4DUP0_HUMANcDNAFLJ59433,highlysimilartoElongationfactor1-gammaOS=HomosapiensPE=2SV=1;tr|B4DUK7|B4DUK7_HUMANcDNAFLJ59991,highlysimilartoElongationfactor1-gammaOS=Homosapien…	tr|Q53YD7|Q53YD7_HUMAN EEF1G protein OS=Homo sapiens GN=EEF1G PE=2 SV=1;sp|P26641|EF1G_HUMAN Elongation factor 1-gamma OS=Homo sapiens GN=EEF1G PE=1 SV=3;sp|P26641-2|EF1G_HUMAN Isoform 2 of Elongation factor 1-gamma OS=Homo sapiens GN=EEF1G;tr|B4DUP0|B4DUP	483000	335780	770480	1081500	198520	1014700	568180	493680	7	7	5	8	8	6	9	9	8	7	5	8	8	6	9	9	8	50.118	0	20.079	By MS/MS	By MS/MS	By MS/MS	By MS/MS	By MS/MS	By MS/MS	By MS/MS	By MS/MS	18.1	13	20.1	20.6	15.6	21.7	22	19.7	11592000	8058600	18492000	25957000
tr|Q8NB88|Q8NB88_HUMANcDNAFLJ34075fis,cloneFCBBF3003216OS=HomosapiensPE=2SV=1;sp|Q7Z3D6-5|GLUCM_HUMANIsoform5ofD-glutamatecyclase,mitochondrialOS=HomosapiensGN=C14orf159;sp|Q7Z3D6-3|GLUCM_HUMANIsoform3ofD-glutamatecyclase,mitochondrialOS=HomosapiensGN=C14orf159;sp|Q7Z3D6|GLUCM_HUMAND-glutamatecyclase,mitochondrialOS=HomosapiensGN=C14orf159PE=1SV=2;tr|Q6IA66|Q6IA66_HUMANC14orf159proteinOS=Homosapi…	tr|Q8NB88|Q8NB88_HUMAN cDNA FLJ34075 fis, clone FCBBF3003216 OS=Homo sapiens PE=2 SV=1;sp|Q7Z3D6-5|GLUCM_HUMAN Isoform 5 of D-glutamate cyclase, mitochondrial OS=Homo sapiens GN=C14orf159;sp|Q7Z3D6-3|GLUCM_HUMAN Isoform 3 of D-glutamate cyclase, mitochondr	482370	479080	465730	696080	22607	56979	211150	182230	16	8	7	5	8	1	1	3	3	8	7	5	8	1	1	3	3	52.62	0	21.208	By MS/MS	By MS/MS	By MS/MS	By MS/MS	By MS/MS	By MS/MS	By MS/MS	By MS/MS	22.2	19.1	12.8	22.2	2.4	2.4	7.3	7.3	10130000	10061000	9780300	14618000
sp|P05109|S10A8_HUMANProteinS100-A8OS=HomosapiensGN=S100A8PE=1SV=1	sp|P05109|S10A8_HUMAN Protein S100-A8 OS=Homo sapiens GN=S100A8 PE=1 SV=1	480570	1952600	225000	468080	55092	0	805840	367230	1	2	3	1	1	1	0	3	3	2	3	1	1	1	0	3	3	10.834	0	3.4407	By MS/MS	By MS/MS	By MS/MS	By matching	By MS/MS		By MS/MS	By MS/MS	23.7	31.2	11.8	11.8	11.8	0	31.2	31.2	3844500	15621000	1800000	3744600
sp|P05141|ADT2_HUMANADP/ATPtranslocase2OS=HomosapiensGN=SLC25A5PE=1SV=7;tr|Q6NVC0|Q6NVC0_HUMANSLC25A5protein(Fragment)OS=HomosapiensGN=SLC25A5PE=2SV=1;sp|Q9H0C2|ADT4_HUMANADP/ATPtranslocase4OS=HomosapiensGN=SLC25A31PE=2SV=1	sp|P05141|ADT2_HUMAN ADP/ATP translocase 2 OS=Homo sapiens GN=SLC25A5 PE=1 SV=7;tr|Q6NVC0|Q6NVC0_HUMAN SLC25A5 protein (Fragment) OS=Homo sapiens GN=SLC25A5 PE=2 SV=1	480520	1371500	1845700	2346400	833310	4686700	348820	22280	3	13	11	12	14	12	13	12	8	4	3	4	4	4	5	4	2	32.852	0	8.544	By MS/MS	By MS/MS	By MS/MS	By MS/MS	By MS/MS	By MS/MS	By MS/MS	By matching	34.6	30.5	33.6	35.2	33.6	38.6	33.6	22.8	9129900	26059000	35067000	44581000
sp|Q96PE5-3|OPALI_HUMANIsoform3ofOpalinOS=HomosapiensGN=OPALIN;tr|A0A0A0MS47|A0A0A0MS47_HUMANOpalinOS=HomosapiensGN=OPALINPE=1SV=1;sp|Q96PE5-4|OPALI_HUMANIsoform4ofOpalinOS=HomosapiensGN=OPALIN;sp|Q96PE5-2|OPALI_HUMANIsoform2ofOpalinOS=HomosapiensGN=OPALIN;sp|Q96PE5|OPALI_HUMANOpalinOS=HomosapiensGN=OPALINPE=2SV=1;tr|A0A0A0MTN4|A0A0A0MTN4_HUMANOpalinOS=HomosapiensGN=OPALINPE=1SV=1	sp|Q96PE5-3|OPALI_HUMAN Isoform 3 of Opalin OS=Homo sapiens GN=OPALIN;tr|A0A0A0MS47|A0A0A0MS47_HUMAN Opalin OS=Homo sapiens GN=OPALIN PE=1 SV=1;sp|Q96PE5-4|OPALI_HUMAN Isoform 4 of Opalin OS=Homo sapiens GN=OPALIN;sp|Q96PE5-2|OPALI_HUMAN Isoform 2 of Opali	479640	100620	700430	750030	101270	948950	127370	1368300	6	4	1	2	4	1	3	2	3	4	1	2	4	1	3	2	3	13.344	0	12.386	By MS/MS	By MS/MS	By MS/MS	By MS/MS	By MS/MS	By MS/MS	By MS/MS	By MS/MS	47.5	10.2	29.7	47.5	10.2	28	21.2	40.7	2877800	603700	4202600	4500200
tr|H0Y870|H0Y870_HUMANTransmembraneprotein222OS=HomosapiensGN=TMEM222PE=1SV=2;tr|H0Y861|H0Y861_HUMANChromosome1openreadingframe160,isoformCRA_eOS=HomosapiensGN=TMEM222PE=1SV=2;tr|Q8TDQ4|Q8TDQ4_HUMANTransmembraneprotein222OS=HomosapiensGN=TMEM222PE=1SV=1;tr|B2R7T5|B2R7T5_HUMANcDNA,FLJ93595OS=HomosapiensPE=2SV=1;tr|Q5SSC2|Q5SSC2_HUMANTransmembraneprotein222(Fragment)OS=HomosapiensGN=TMEM222PE=1SV=2…	tr|H0Y870|H0Y870_HUMAN Transmembrane protein 222 OS=Homo sapiens GN=TMEM222 PE=1 SV=2;tr|H0Y861|H0Y861_HUMAN Chromosome 1 open reading frame 160, isoform CRA_e OS=Homo sapiens GN=TMEM222 PE=1 SV=2;tr|Q8TDQ4|Q8TDQ4_HUMAN Transmembrane protein 222 OS=Homo sa	474900	296830	202070	787090	0	579530	0	0	10	2	2	1	2	0	1	0	0	2	2	1	2	0	1	0	0	16.805	0	7.4052	By MS/MS	By MS/MS	By MS/MS	By MS/MS		By MS/MS			19	27.2	17.7	19	0	17.7	0	0	2374500	1484200	1010300	3935400
sp|P01861|IGHG4_HUMANImmunoglobulinheavyconstantgamma4OS=HomosapiensGN=IGHG4PE=1SV=1	sp|P01861|IGHG4_HUMAN Immunoglobulin heavy constant gamma 4 OS=Homo sapiens GN=IGHG4 PE=1 SV=1	472630	558520	163480	246950	103010	193380	0	0	1	7	6	5	5	3	4	3	4	0	0	0	0	0	0	0	0	35.94	0	6.7891	By MS/MS	By MS/MS	By matching	By matching	By MS/MS	By matching	By matching	By matching	31.5	23.2	18	19.6	11	15.9	11.6	13.8	6616800	7819300	2288700	3457200
tr|A0A0S2Z3L2|A0A0S2Z3L2_HUMANATPaseCa++transportingcardiacmuscleslowtwitch2isoform1(Fragment)OS=HomosapiensGN=ATP2A2PE=2SV=1;sp|P16615|AT2A2_HUMANSarcoplasmic/endoplasmicreticulumcalciumATPase2OS=HomosapiensGN=ATP2A2PE=1SV=1;sp|P16615-5|AT2A2_HUMANIsoform5ofSarcoplasmic/endoplasmicreticulumcalciumATPase2OS=HomosapiensGN=ATP2A2;sp|P16615-2|AT2A2_HUMANIsoform2ofSarcoplasmic/endoplasmicreticulumcal…	tr|A0A0S2Z3L2|A0A0S2Z3L2_HUMAN ATPase Ca++ transporting cardiac muscle slow twitch 2 isoform 1 (Fragment) OS=Homo sapiens GN=ATP2A2 PE=2 SV=1;sp|P16615|AT2A2_HUMAN Sarcoplasmic/endoplasmic reticulum calcium ATPase 2 OS=Homo sapiens GN=ATP2A2 PE=1 SV=1;sp|P	467450	2449500	3094300	2274600	434710	4475000	699710	71149	29	20	18	21	28	17	27	18	8	20	18	21	28	17	27	18	8	114.76	0	149.26	By MS/MS	By MS/MS	By MS/MS	By MS/MS	By MS/MS	By MS/MS	By MS/MS	By MS/MS	28.3	22.2	25	36.4	19.2	31.4	20.2	8.8	21503000	112680000	142340000	104630000
sp|O94832|MYO1D_HUMANUnconventionalmyosin-IdOS=HomosapiensGN=MYO1DPE=1SV=2;tr|Q7Z3N6|Q7Z3N6_HUMANUncharacterizedproteinDKFZp686A01173(Fragment)OS=HomosapiensGN=DKFZp686A01173PE=2SV=1;tr|K7EIG7|K7EIG7_HUMANUnconventionalmyosin-IdOS=HomosapiensGN=MYO1DPE=1SV=1;tr|J3QRN6|J3QRN6_HUMANUnconventionalmyosin-IdOS=HomosapiensGN=MYO1DPE=1SV=1;tr|J3KRL0|J3KRL0_HUMANUnconventionalmyosin-IdOS=HomosapiensGN=MY…	sp|O94832|MYO1D_HUMAN Unconventional myosin-Id OS=Homo sapiens GN=MYO1D PE=1 SV=2;tr|Q7Z3N6|Q7Z3N6_HUMAN Uncharacterized protein DKFZp686A01173 (Fragment) OS=Homo sapiens GN=DKFZp686A01173 PE=2 SV=1;tr|K7EIG7|K7EIG7_HUMAN Unconventional myosin-Id OS=Homo s	467040	42529	260140	420030	53523	34643	3398.6	67260	7	29	6	11	22	6	3	2	6	29	6	11	22	6	3	2	6	116.2	0	48.397	By MS/MS	By matching	By MS/MS	By MS/MS	By MS/MS	By matching	By MS/MS	By MS/MS	31.8	5.1	10	24.5	5.8	2.7	1.8	5.6	28956000	2636800	16129000	26042000
tr|A8CDT9|A8CDT9_HUMANMYO5AvariantproteinOS=HomosapiensPE=2SV=1;sp|Q9Y4I1-2|MYO5A_HUMANIsoform2ofUnconventionalmyosin-VaOS=HomosapiensGN=MYO5A;tr|G3V394|G3V394_HUMANUnconventionalmyosin-VaOS=HomosapiensGN=MYO5APE=1SV=1;tr|F8WE88|F8WE88_HUMANUnconventionalmyosin-VaOS=HomosapiensGN=MYO5APE=1SV=2;sp|Q9Y4I1|MYO5A_HUMANUnconventionalmyosin-VaOS=HomosapiensGN=MYO5APE=1SV=2;sp|Q9Y4I1-3|MYO5A_HUMANIsofor…	tr|A8CDT9|A8CDT9_HUMAN MYO5A variant protein OS=Homo sapiens PE=2 SV=1;sp|Q9Y4I1-2|MYO5A_HUMAN Isoform 2 of Unconventional myosin-Va OS=Homo sapiens GN=MYO5A;tr|G3V394|G3V394_HUMAN Unconventional myosin-Va OS=Homo sapiens GN=MYO5A PE=1 SV=1;tr|F8WE88|F8WE8	465560	835020	874990	1198400	243380	1406100	173600	32953	29	40	36	33	42	23	41	30	10	40	36	33	42	23	41	30	10	212.26	0	201.94	By MS/MS	By MS/MS	By MS/MS	By MS/MS	By MS/MS	By MS/MS	By MS/MS	By MS/MS	23.9	20	17.5	26.4	14	24.8	17.3	5.1	44694000	80162000	83999000	115050000
tr|H3BS66|H3BS66_HUMANSmallintegralmembraneprotein1OS=HomosapiensGN=SMIM1PE=1SV=1;tr|M4WDD3|M4WDD3_HUMANSmallintegralmembraneprotein1OS=HomosapiensGN=SMIM1PE=2SV=1;sp|B2RUZ4|SMIM1_HUMANSmallintegralmembraneprotein1OS=HomosapiensGN=SMIM1PE=1SV=1	tr|H3BS66|H3BS66_HUMAN Small integral membrane protein 1 OS=Homo sapiens GN=SMIM1 PE=1 SV=1;tr|M4WDD3|M4WDD3_HUMAN Small integral membrane protein 1 OS=Homo sapiens GN=SMIM1 PE=2 SV=1;sp|B2RUZ4|SMIM1_HUMAN Small integral membrane protein 1 OS=Homo sapiens	464230	0	0	0	0	0	0	0	3	1	0	0	0	0	0	0	0	1	0	0	0	0	0	0	0	4.1915	0	3.5752	By MS/MS								43.2	0	0	0	0	0	0	0	928450	0	0	0
tr|B2R642|B2R642_HUMANcDNA,FLJ92775,highlysimilartoHomosapiensmelanomacelladhesionmolecule(MCAM),mRNAOS=HomosapiensPE=2SV=1;tr|A0A024R3I5|A0A024R3I5_HUMANMelanomacelladhesionmolecule,isoformCRA_aOS=HomosapiensGN=MCAMPE=4SV=1;sp|P43121|MUC18_HUMANCellsurfaceglycoproteinMUC18OS=HomosapiensGN=MCAMPE=1SV=2;tr|B3KXZ9|B3KXZ9_HUMANcDNAFLJ46477fis,cloneTHYMU3025118,highlysimilartoCellsurfaceglycoproteinM…	tr|B2R642|B2R642_HUMAN cDNA, FLJ92775, highly similar to Homo sapiens melanoma cell adhesion molecule (MCAM), mRNA OS=Homo sapiens PE=2 SV=1;tr|A0A024R3I5|A0A024R3I5_HUMAN Melanoma cell adhesion molecule, isoform CRA_a OS=Homo sapiens GN=MCAM PE=4 SV=1;sp|	463630	263910	533650	724670	43057	414680	199670	796420	6	11	5	4	10	3	5	8	10	11	5	4	10	3	5	8	10	71.635	0	47.622	By MS/MS	By MS/MS	By MS/MS	By MS/MS	By MS/MS	By MS/MS	By MS/MS	By MS/MS	25.7	11.1	9	23.8	7.6	12.4	13.3	16.4	15764000	8973000	18144000	24639000
tr|Q6IAL5|Q6IAL5_HUMANSuccinate--CoAligase[ADP/GDP-forming]subunitalpha,mitochondrialOS=HomosapiensGN=SUCLG1PE=2SV=1;tr|A8K4W7|A8K4W7_HUMANSuccinate--CoAligase[ADP/GDP-forming]subunitalpha,mitochondrialOS=HomosapiensGN=SUCLG1PE=2SV=1;sp|P53597|SUCA_HUMANSuccinate--CoAligase[ADP/GDP-forming]subunitalpha,mitochondrialOS=HomosapiensGN=SUCLG1PE=1SV=4;tr|B2R8A1|B2R8A1_HUMANSuccinate--CoAligase[ADP/GDP…	tr|Q6IAL5|Q6IAL5_HUMAN Succinate--CoA ligase [ADP/GDP-forming] subunit alpha, mitochondrial OS=Homo sapiens GN=SUCLG1 PE=2 SV=1;tr|A8K4W7|A8K4W7_HUMAN Succinate--CoA ligase [ADP/GDP-forming] subunit alpha, mitochondrial OS=Homo sapiens GN=SUCLG1 PE=2 SV=1;	457540	978050	298290	1140800	102230	483760	119750	44088	6	5	5	5	6	2	3	3	2	5	5	5	6	2	3	3	2	35.047	0	55.715	By MS/MS	By MS/MS	By MS/MS	By MS/MS	By MS/MS	By MS/MS	By MS/MS	By MS/MS	16.8	20.4	20.1	25.2	7.2	11.7	11.7	7.2	6405600	13693000	4176100	15971000
[truncated: 1,821 more rows]
[truncated: 37 more columns]
