# Supplementary material for: Altered Cortical Palmitoylation Induces Widespread Molecular Disturbances in Parkinson’s Disease
Source: Int J Mol Sci. 2022 Nov 14;23(22):14018. doi: 10.3390/ijms232214018 (PMC9696982; doi:10.3390/ijms232214018)
Supplement: Supplementary file 1 [file ijms-23-14018-s001.zip › Supplementary Table S3.xlsx]

## Sheet: Diff
	Supplementary table S3. List of 84 differential palmitoylated proteins (DPPs) in the cortex of PD patients
Accesion Uniprot	Gene Symbol	Protein Name	log2(Fold Change)	p-value
P02671	FGA	Fibrinogen alpha chain	3.53882241350522	4.10463891015303e-4
A0A140VJJ6	FGG	Fibrinogen gamma chain	2.59618947986555	0.00176559070433157
P55011	SLC12A2	Solute carrier family 12 member 2, Basolateral Na-K-Cl symporter, Bumetanide-sensitive sodium-(potassium)-chloride cotransporter 2	1.9629258128472	0.0342709686676317
V9HVY1	HEL-S-78p	Fibrinogen beta chain	1.9516500083648	0.0119627954790077
B4DY28	CSRP1	cDNA FLJ61189, highly similar to Cysteine and glycine-rich protein 1	1.537141347743	0.00121138486937983
Q08211	DHX9	ATP-dependent RNA helicase A, 3.6.4.13, DEAH box protein 9, DExH-box helicase 9, Leukophysin, LKP, Nuclear DNA helicase II, NDH II, RNA helicase A	1.50739269178683	0.0415215990916207
A0A024R394	CHORDC1	Cysteine and histidine-rich domain (CHORD)-containing 1, isoform	1.49188668690786	8.4420246346331e-5
V9HWA9	HEL-S-62p	Complement C3	1.39847238376237	0.0218324195591429
O43491	EPB41L2	Band 4.1-like protein 2, Erythrocyte membrane protein band 4.1-like 2, Generally expressed protein 4.1, 4.1G	1.39628973512012	0.0056381067363523
O15354	GPR37	Prosaposin receptor GPR37, Endothelin B receptor-like protein 1, ETBR-LP-1, G-protein coupled receptor 37, Parkin-associated endothelin receptor-like receptor, PAELR	1.26587240544043	0.0389670059713793
A0A024R8G3	PTGDS	Prostaglandin-H2 D-isomerase	1.236952848339	0.00991441013730438
P17858	PFKL	ATP-dependent 6-phosphofructokinase, liver type, ATP-PFK, PFK-L, 2.7.1.11, 6-phosphofructokinase type B, Phosphofructo-1-kinase isozyme B, PFK-B, Phosphohexokinase	1.21839098924807	0.0093062190165747
F8VQX6	METTL7A	Putative methyltransferase-like protein 7A	1.17077073831359	0.0343052211186722
P41091	EIF2S3	Eukaryotic translation initiation factor 2 subunit 3	1.1697536145896	0.0176498496274581
Q969P0	IGSF8	Immunoglobulin superfamily member 8	1.16185374267305	0.0317835304216551
O95858	TSPAN15	Tetraspanin-15	1.13823302029487	0.0371358761212572
Q9UQ16	DNM3	Dynamin-3	1.0252503801865	0.0280866863573587
A0A024R6B5	HSPA2	Heat shock 70kDa protein 2, isoform CRA_a	0.979940282430199	0.0415742043641167
D3DNG6	PLSCR4	Phospholipid scramblase	0.948553902445695	0.0170278201667237
O94919	ENDOD1	Endonuclease domain-containing 1 protein	0.94361248215445	0.0232255606954503
P48426	PIP4K2A	Phosphatidylinositol 5-phosphate 4-kinase type-2 alpha	0.867784394460102	0.0178333713086999
Q16658	FSCN1	Fascin	0.858243231460751	0.0102798739972067
C9JVN9	L2HGDH	L-2-hydroxyglutarate dehydrogenase, mitochondrial	0.854993960234204	0.0115538586349692
A0A024QYW3	PLP2	Proteolipid protein 2 (Colonic epithelium-enriched), isoform CRA_a	0.815975606484294	0.0313278576354048
Q5VST6	ABHD17B	Alpha/beta hydrolase domain-containing protein 17B	0.784382512397798	0.0415452297121121
V9HWD9	HEL107	Epididymis luminal protein 107, Transketolase (Wernicke-Korsakoff syndrome), isoform CRA_a, Transketolase isoform 1	0.761876195995548	0.048251306701287
Q9C0C9	UBE2O	(E3-independent) E2 ubiquitin-conjugating enzyme	0.674382150884931	0.0101209253061596
P23381	WARS1	Tryptophan--tRNA ligase, cytoplasmic	0.613512758067429	0.0199544969166421
H0Y4R1	IMPDH2	Inosine-5'-monophosphate dehydrogenase	-2.26495904832408	0.044674950751352
Q6LET3	HPRT1	Hypoxanthine phosphoribosyltransferase	-2.10146837673413	0.00490081524606749
H0YFA4	CRIP2	Cysteine-rich protein 2	-1.52252737325215	0.0141576893719267
Q9UI15	TAGLN3	Transgelin-3	-1.49920374817728	0.0253725994267727
Q13509	TUBB3	Tubulin beta-3 chain	-1.42253526363366	0.00339569621133762
P61224	RAP1B	Ras-related protein Rap-1b	-1.41792163120313	0.041173740643684
A0A024R1I3	PDXP	Pyridoxal (Pyridoxine, vitamin B6) phosphatase, isoform CRA_a	-1.3850410996738	0.0260856451207365
E5KLK2	OPA1	Dynamin-like 120 kDa protein, mitochondrial	-1.25140017912113	7.28320837107524e-4
Q13885	TUBB2A	Tubulin beta-2A chain	-1.21659867025305	0.0148195667599485
Q92841	DDX17	Probable ATP-dependent RNA helicase DDX17	-1.2139260866691	0.00482068417726061
Q584P1	PCYOX1	Uncharacterized protein PCYOX1	-1.17429317448117	0.020155850397321
V9HWI5	HEL-S-15	Cofilin-1	-1.16516714062961	0.0418912203159669
P30048	PRDX3	Thioredoxin-dependent peroxide reductase, mitochondrial	-1.15842464251253	0.00669681205500541
Q92945	KHSRP	Far upstream element-binding protein 2	-1.1513481041923	0.0410088702487514
Q3KQU3	MAP7D1	MAP7 domain-containing protein 1	-1.10710595280855	0.0340233886679306
K7ENE8	FXYD7	FXYD domain-containing ion transport regulator	-1.10476740543617	0.0254202250301614
A0A024QZI8	C16orf45	Chromosome 16 open reading frame 45, isoform CRA_a	-1.09894821998657	0.00240011000591032
B4DJV2	CS	Citrate synthase	-1.09384699551505	0.0238671747699127
Q9UGC6	RGS17	Regulator of G-protein signaling 17	-1.09102223726829	0.00948404889687467
P15924	DSP	Desmoplakin	-1.08463583489973	0.00801139725809915
Q16643	DBN1	Drebrin	-1.0624472845146	0.0136117747626873
Q4L233	FREP1	Brain-specific protein p25 alpha, isoform CRA_b, Fibroblast growth factor-2 repression protein-1, Tubulin polymerization promoting protein, cDNA FLJ30358 fis, clone BRACE2007749, highly similar to Tubulin polymerization-promoting protein	-1.05409347657472	0.0347976241235104
Q5T8U3	RPL7A	60S ribosomal protein L7a	-1.05386072684805	0.00202017285560366
P04350	TUBB4A	Tubulin beta-4A chain	-1.03425479872615	0.0486399974087864
P49821	NDUFV1	NADH dehydrogenase [ubiquinone] flavoprotein 1, mitochondrial	-1.0010730197355	0.0367237859794352
O76041	NEBL	Nebulette	-0.97587955990678	0.00835158459706407
Q13554	CAMK2B	Calcium/calmodulin-dependent protein kinase type II subunit beta	-0.940804357421321	0.0216099862397783
Q5HYM2	DKFZp686O2462	Uncharacterized protein DKFZp686O2462	-0.939632698589623	0.00543921833232876
P10636	MAPT	Microtubule-associated protein tau	-0.935439812740601	0.00735184539201832
Q9ULR3	PPM1H	Protein phosphatase 1H	-0.906873122203173	0.0431299036534501
P31930	UQCRC1	Cytochrome b-c1 complex subunit 1, mitochondrial	-0.860280064227648	0.0191692786394726
A0A140VK69	GOT1	Aspartate aminotransferase	-0.852343669285467	0.0234435606354901
B7ZAF6	SUCLA2	Succinate--CoA ligase [ADP-forming] subunit beta, mitochondrial	-0.838746097535726	0.00762626614008905
P10599	TXN	Thioredoxin	-0.836107886644292	0.00558135768002316
D3DU87	CASKIN1	CASK interacting protein 1, isoform CRA_a	-0.829600201481831	0.044251877998507
Q9UPV7	PHF24	PHD finger protein 24	-0.822664848720098	0.028132598639129
A0A024R1K7	YWHAH	Tyrosine 3-monooxygenase/tryptophan 5-monooxygenase activation protein, eta polypeptide, isoform CRA_b	-0.810474625998875	0.0269960617676278
P38606	ATP6V1A	V-type proton ATPase catalytic subunit A	-0.776716509367077	0.0340770535355011
Q7Z6G8	ANKS1B	Ankyrin repeat and sterile alpha motif domain-containing protein 1B	-0.754620751832828	0.0141732409278924
Q9UQ49	NEU3	Sialidase-3	-0.752535776247427	0.0166885454056989
Q96JE9	MAP6	Microtubule-associated protein 6	-0.747987835931706	0.0429663465282965
O15294	OGT	UDP-N-acetylglucosamine--peptide N-acetylglucosaminyltransferase 110 kDa subunit, 2.4.1.255, O-GlcNAc transferase subunit p110, O-linked N-acetylglucosamine transferase 110 kDa subunit, OGT	-0.720485376090046	0.0124149370763131
A0A0S2Z575	RDH11	Retinol dehydrogenase 11 isoform 2	-0.697661576060451	0.0244785420495854
P60880	SNAP25	Synaptosomal-associated protein 25	-0.665379044139073	0.0374528657704851
Q9Y2I8	WDR37	WD repeat-containing protein 37	-0.660562247654823	0.042627043363589
I6L975	HSDL1	Hydroxysteroid dehydrogenase like 1	-0.625700624739132	0.0465919214570692
Q8NCL6		cDNA FLJ90170 fis, clone MAMMA1000370, highly similar to Ig alpha-1 chain C region	1.75026	0.0271167
B4DNW4		Aquaporin-1	1.67652	0.0208746
B4E0E1		Poly [ADP-ribose] polymerase	1.01798	0.0248722
B7Z9L8		cDNA, FLJ78882, highly similar to Homo sapiens SH3 multiple domains 1 (SH3MD1), mRNA	0.741679	0.0287902
B4DSN3		cDNA FLJ60345, highly similar to Protein transport protein Sec24C	0.680731	0.0259475
Q53HR2		Acyl-Coenzyme A dehydrogenase, very long chain variant	-1.68945	0.0186327
Q8NB88		cDNA FLJ34075 fis, clone FCBBF3003216	-1.02964	0.00140018
Q53GF0		N-acylneuraminate cytidylyltransferase	-0.889279	0.00428198
B4DSA4		Ferrochelatase	-0.723492	0.0346999
A0A024R319			-0.68267	0.0107556
