# Supplementary material for: Altered Cortical Palmitoylation Induces Widespread Molecular Disturbances in Parkinson’s Disease
Source: Int J Mol Sci. 2022 Nov 14;23(22):14018. doi: 10.3390/ijms232214018 (PMC9696982; doi:10.3390/ijms232214018)
Supplement: Supplementary file 1 [file ijms-23-14018-s001.zip › Supplementary Table S4.xlsx]

## Sheet: Hoja1
Supplementary table S4. Results from Gene Ontology term search using enrichGO function from clusterProfiler package.
Ont	ID	Description	GeneRatio	BgRatio	pvalue	p.adjust	qvalue	geneID	Count
BP	GO:0072378	blood coagulation, fibrin clot formation	3/57	20/29157	7.88657732758672e-06	0.00385288391766474	0.00312423613497122	FGA/FGG/FGB	3
BP	GO:0010770	positive regulation of cell morphogenesis involved in differentiation	5/57	148/29157	1.06590568351936e-05	0.00385288391766474	0.00312423613497122	FGA/FGG/FGB/DBN1/CAMK2B	5
BP	GO:0097061	dendritic spine organization	5/57	154/29157	1.29214785744994e-05	0.00385288391766474	0.00312423613497122	DNM3/ABHD17B/CFL1/DBN1/CAMK2B	5
BP	GO:0099175	regulation of postsynapse organization	5/57	160/29157	1.55424316658222e-05	0.00385288391766474	0.00312423613497122	DNM3/ABHD17B/CFL1/DBN1/CAMK2B	5
BP	GO:0061001	regulation of dendritic spine morphogenesis	4/57	80/29157	1.85801109883021e-05	0.00385288391766474	0.00312423613497122	DNM3/CFL1/DBN1/CAMK2B	4
BP	GO:0048813	dendrite morphogenesis	6/57	283/29157	1.89935839902082e-05	0.00385288391766474	0.00312423613497122	DNM3/CFL1/DBN1/CAMK2B/YWHAH/MAP6	6
BP	GO:0072376	protein activation cascade	3/57	27/29157	2.00395990969807e-05	0.00385288391766474	0.00312423613497122	FGA/FGG/FGB	3
BP	GO:0106027	neuron projection organization	5/57	174/29157	2.32737337330498e-05	0.00385288391766474	0.00312423613497122	DNM3/ABHD17B/CFL1/DBN1/CAMK2B	5
BP	GO:0034116	positive regulation of heterotypic cell-cell adhesion	3/57	29/29157	2.49646906112186e-05	0.00385288391766474	0.00312423613497122	FGA/FGG/FGB	3
BP	GO:0034109	homotypic cell-cell adhesion	5/57	181/29157	2.81179550521254e-05	0.00390558395674022	0.00316696967429202	FGA/FGG/FGB/CSRP1/DSP	5
BP	GO:0010769	regulation of cell morphogenesis involved in differentiation	5/57	186/29157	3.20324078945787e-05	0.00404481950596089	0.00327987334422959	FGA/FGG/FGB/DBN1/CAMK2B	5
BP	GO:0034113	heterotypic cell-cell adhesion	4/57	104/29157	5.216892579513e-05	0.0060385531607863	0.00489655707024466	FGA/FGG/FGB/DSP	4
BP	GO:0060997	dendritic spine morphogenesis	4/57	111/29157	6.72630093313795e-05	0.00718679384317586	0.00582764534288066	DNM3/CFL1/DBN1/CAMK2B	4
BP	GO:0031639	plasminogen activation	3/57	45/29157	9.48203859054496e-05	0.00878036773484463	0.00711984652061972	FGA/FGG/FGB	3
BP	GO:0042730	fibrinolysis	3/57	45/29157	9.48203859054496e-05	0.00878036773484463	0.00711984652061972	FGA/FGG/FGB	3
BP	GO:2000352	negative regulation of endothelial cell apoptotic process	3/57	47/29157	0.000108051851196184	0.00938025133196871	0.00760628163025768	FGA/FGG/FGB	3
BP	GO:0061045	negative regulation of wound healing	4/57	129/29157	0.000120462211108205	0.00944767667573021	0.00766095566142346	FGA/FGG/SLC12A2/FGB	4
BP	GO:0034114	regulation of heterotypic cell-cell adhesion	3/57	49/29157	0.000122432095149851	0.00944767667573021	0.00766095566142346	FGA/FGG/FGB	3
BP	GO:0070527	platelet aggregation	4/57	139/29157	0.000160596839249315	0.0117404741956473	0.00952014504137214	FGA/FGG/FGB/CSRP1	4
BP	GO:1902042	negative regulation of extrinsic apoptotic signaling pathway via death domain receptors	3/57	59/29157	0.000213058022832793	0.0147968796857375	0.011998530759531	FGA/FGG/FGB	3
BP	GO:1904428	negative regulation of tubulin deacetylation	2/57	12/29157	0.000244722533622301	0.015775543998909	0.012792112522324	TPPP/MAPT	2
BP	GO:0070507	regulation of microtubule cytoskeleton organization	5/57	288/29157	0.000249864627772496	0.015775543998909	0.012792112522324	BMERB1/TPPP/TUBB4A/MAPT/MAP6	5
BP	GO:1903035	negative regulation of response to wounding	4/57	161/29157	0.000281673843060168	0.0170106507830684	0.0137936389965391	FGA/FGG/SLC12A2/FGB	4
BP	GO:0045907	positive regulation of vasoconstriction	3/57	71/29157	0.00036841169469761	0.0213218268306242	0.0172894961985282	FGA/FGG/FGB	3
BP	GO:0016358	dendrite development	6/57	493/29157	0.000396464855729596	0.0220275873843364	0.017861785079186	DNM3/CFL1/DBN1/CAMK2B/YWHAH/MAP6	6
BP	GO:0099173	postsynapse organization	5/57	324/29157	0.000428561397281065	0.0228950684932076	0.0185652103275603	DNM3/ABHD17B/CFL1/DBN1/CAMK2B	5
BP	GO:2000351	regulation of endothelial cell apoptotic process	3/57	83/29157	0.000582499697750257	0.0291696782374931	0.0236531815498599	FGA/FGG/FGB	3
BP	GO:1902414	protein localization to cell junction	4/57	202/29157	0.000662856135332743	0.0291696782374931	0.0236531815498599	ABHD17B/DSP/MAPT/SNAP25	4
BP	GO:1902041	regulation of extrinsic apoptotic signaling pathway via death domain receptors	3/57	87/29157	0.000668272561148228	0.0291696782374931	0.0236531815498599	FGA/FGG/FGB	3
BP	GO:0060996	dendritic spine development	4/57	204/29157	0.000687712551754384	0.0291696782374931	0.0236531815498599	DNM3/CFL1/DBN1/CAMK2B	4
BP	GO:1900026	positive regulation of substrate adhesion-dependent cell spreading	3/57	88/29157	0.000690902946012501	0.0291696782374931	0.0236531815498599	FGA/FGG/FGB	3
BP	GO:1904036	negative regulation of epithelial cell apoptotic process	3/57	88/29157	0.000690902946012501	0.0291696782374931	0.0236531815498599	FGA/FGG/FGB	3
BP	GO:0090043	regulation of tubulin deacetylation	2/57	20/29157	0.000697459776688487	0.0291696782374931	0.0236531815498599	TPPP/MAPT	2
BP	GO:0030195	negative regulation of blood coagulation	3/57	89/29157	0.000714016601925678	0.0291696782374931	0.0236531815498599	FGA/FGG/FGB	3
BP	GO:1900047	negative regulation of hemostasis	3/57	90/29157	0.000737617680619939	0.0292728845251741	0.0237368697222055	FGA/FGG/FGB	3
BP	GO:0072577	endothelial cell apoptotic process	3/57	92/29157	0.000786298571447946	0.0298764687091711	0.0242263055729704	FGA/FGG/FGB	3
BP	GO:0050819	negative regulation of coagulation	3/57	93/29157	0.000811386545543235	0.0298764687091711	0.0242263055729704	FGA/FGG/FGB	3
BP	GO:0048167	regulation of synaptic plasticity	5/57	375/29157	0.000828933664809436	0.0298764687091711	0.0242263055729704	DBN1/CAMK2B/MAPT/YWHAH/SNAP25	5
BP	GO:0090276	regulation of peptide hormone secretion	5/57	376/29157	0.000838864132222946	0.0298764687091711	0.0242263055729704	FGA/FGG/FGB/PFKL/SNAP25	5
BP	GO:0002791	regulation of peptide secretion	5/57	381/29157	0.000889856196359324	0.0309002564185775	0.0250564771080125	FGA/FGG/FGB/PFKL/SNAP25	5
BP	GO:0090087	regulation of peptide transport	5/57	388/29157	0.000965088312276	0.032695308920765	0.0265120537647066	FGA/FGG/FGB/PFKL/SNAP25	5
BP	GO:0034446	substrate adhesion-dependent cell spreading	4/57	225/29157	0.000990022558893619	0.0327414603405533	0.0265494771432625	FGA/FGG/FGB/LAMB2	4
BP	GO:0061041	regulation of wound healing	4/57	228/29157	0.00103974507090825	0.0333600603519186	0.0270510890656307	FGA/FGG/SLC12A2/FGB	4
BP	GO:0050807	regulation of synapse organization	5/57	396/29157	0.0010567621709751	0.0333600603519186	0.0270510890656307	DNM3/ABHD17B/CFL1/DBN1/CAMK2B	5
BP	GO:0030168	platelet activation	4/57	232/29157	0.0011087411156061	0.0342231424350416	0.0277509472210182	FGA/FGG/FGB/CSRP1	4
BP	GO:0050803	regulation of synapse structure or activity	5/57	405/29157	0.00116747119220332	0.0352525540428351	0.0285856790768319	DNM3/ABHD17B/CFL1/DBN1/CAMK2B	5
BP	GO:0031109	microtubule polymerization or depolymerization	4/57	240/29157	0.00125627813544677	0.0371270283007566	0.0301056574451969	BMERB1/TPPP/TUBB4A/MAPT	4
BP	GO:0097120	receptor localization to synapse	3/57	111/29157	0.00135289068757339	0.0385644502435219	0.0312712377405695	DBN1/ANKS1B/SNAP25	3
BP	GO:0061003	positive regulation of dendritic spine morphogenesis	2/57	28/29157	0.00137371787551482	0.0385644502435219	0.0312712377405695	DBN1/CAMK2B	2
BP	GO:0048814	regulation of dendrite morphogenesis	3/57	112/29157	0.00138820915203463	0.0385644502435219	0.0312712377405695	DBN1/CAMK2B/YWHAH	3
BP	GO:0031638	zymogen activation	3/57	113/29157	0.00142410291298798	0.0387858616890255	0.0314507764065457	FGA/FGG/FGB	3
BP	GO:0060998	regulation of dendritic spine development	3/57	118/29157	0.00161232276621559	0.0430676215821818	0.0349227805637789	DNM3/DBN1/CAMK2B	3
BP	GO:0032886	regulation of microtubule-based process	5/57	440/29157	0.00168128913326565	0.0433045428274714	0.0351148958549463	BMERB1/TPPP/TUBB4A/MAPT/MAP6	5
BP	GO:0090042	tubulin deacetylation	2/57	31/29157	0.00168354594145677	0.0433045428274714	0.0351148958549463	TPPP/MAPT	2
BP	GO:1901032	negative regulation of response to reactive oxygen species	2/57	32/29157	0.0017935325573397	0.0442393853690345	0.0358729433101186	GPR37/TXN	2
BP	GO:1903206	negative regulation of hydrogen peroxide-induced cell death	2/57	32/29157	0.0017935325573397	0.0442393853690345	0.0358729433101186	GPR37/TXN	2
BP	GO:1900024	regulation of substrate adhesion-dependent cell spreading	3/57	123/29157	0.00181543914041394	0.0442393853690345	0.0358729433101186	FGA/FGG/FGB	3
BP	GO:0019229	regulation of vasoconstriction	3/57	124/29157	0.00185788653461049	0.0444931792512754	0.0360787403272818	FGA/FGG/FGB	3
BP	GO:0030072	peptide hormone secretion	5/57	455/29157	0.00194601797450836	0.0458138807896967	0.0371496740896332	FGA/FGG/FGB/PFKL/SNAP25	5
BP	GO:0030193	regulation of blood coagulation	3/57	127/29157	0.00198893516645023	0.0460438491033228	0.0373361513702061	FGA/FGG/FGB	3
BP	GO:1900046	regulation of hemostasis	3/57	129/29157	0.00207942128826851	0.0473494454000812	0.0383948365564677	FGA/FGG/FGB	3
BP	GO:0002790	peptide secretion	5/57	464/29157	0.00211883718980399	0.0474687880102861	0.0384916093903271	FGA/FGG/FGB/PFKL/SNAP25	5
CC	GO:0005577	fibrinogen complex	3/58	16/30548	3.57393369278576e-06	0.000629012329930294	0.000477778504193465	FGA/FGG/FGB	3
CC	GO:0072562	blood microparticle	5/58	207/30548	4.6585022978301e-05	0.00409948202209049	0.00311384100960223	FGA/FGG/FGB/C3/HSPA2	5
CC	GO:0030426	growth cone	5/58	374/30548	0.000720688622379083	0.0352768654784931	0.0267952267689511	FSCN1/TUBB3/DBN1/MAPT/SNAP25	5
CC	GO:0030427	site of polarized growth	5/58	383/30548	0.000801746942693026	0.0352768654784931	0.0267952267689511	FSCN1/TUBB3/DBN1/MAPT/SNAP25	5
CC	GO:0030027	lamellipodium	5/58	409/30548	0.00107436754569359	0.035380387832232	0.0268738591787887	FSCN1/TUBB3/PDXP/CFL1/DBN1	5
CC	GO:0043083	synaptic cleft	2/58	27/30548	0.00120614958518973	0.035380387832232	0.0268738591787887	DNM3/LAMB2	2
CC	GO:0031093	platelet alpha granule lumen	3/58	124/30548	0.00171153275360382	0.0396255465833265	0.0300983517708282	FGA/FGG/FGB	3
CC	GO:0031258	lamellipodium membrane	2/58	33/30548	0.00180116120833302	0.0396255465833265	0.0300983517708282	PDXP/CFL1	2
MF	GO:0031072	heat shock protein binding	5/56	249/30001	0.000102318190478133	0.0224076837147112	0.0178787574940738	SLC12A2/GPR37/HSPA2/PDXP/MAPT	5
MF	GO:0005200	structural constituent of cytoskeleton	4/56	183/30001	0.000384101672725499	0.0420591331634421	0.0335583566697015	TUBB3/TUBB2A/DSP/TUBB4A	4
