# Supplementary material for: Altered Cortical Palmitoylation Induces Widespread Molecular Disturbances in Parkinson’s Disease
Source: Int J Mol Sci. 2022 Nov 14;23(22):14018. doi: 10.3390/ijms232214018 (PMC9696982; doi:10.3390/ijms232214018)
Supplement: Supplementary file 1 [file ijms-23-14018-s001.zip › Supplementary Table S5.xlsx]

## Sheet: Enrichment
	Supplementary table S5. Results from Metascape with the top-13 more significant and non-redundant clusters of the analysis
GroupID	Category	Term	Description	LogP	Log(q-value)	InTerm_InList	Genes	Symbols
1_Summary	KEGG Pathway	hsa05012	Parkinson disease	-7.77751	-4.43013	9/266	816,2861,4137,4723,7280,7295,7384,10381,10382,3306,26052,7533,523,718,6616,2037,1072,1627,1832,6130,10825	CAMK2B,GPR37,MAPT,NDUFV1,TUBB2A,TXN,UQCRC1,TUBB3,TUBB4A,HSPA2,DNM3,YWHAH,ATP6V1A,C3,SNAP25,EPB41L2,CFL1,DBN1,DSP,RPL7A,NEU3
1_Member	KEGG Pathway	hsa05012	Parkinson disease	-7.77751	-4.43013	9/266	816,2861,4137,4723,7280,7295,7384,10381,10382	CAMK2B,GPR37,MAPT,NDUFV1,TUBB2A,TXN,UQCRC1,TUBB3,TUBB4A
1_Member	Reactome Gene Sets	R-HSA-9619483	Activation of AMPK downstream of NMDARs	-6.14534	-3.76128	4/29	4137,7280,10381,10382	MAPT,TUBB2A,TUBB3,TUBB4A
1_Member	WikiPathways	WP2359	Parkin-ubiquitin proteasomal system pathway	-6.08104	-3.72502	5/71	2861,3306,7280,10381,10382	GPR37,HSPA2,TUBB2A,TUBB3,TUBB4A
1_Member	Reactome Gene Sets	R-HSA-438064	Post NMDA receptor activation events	-5.82205	-3.49236	5/80	816,4137,7280,10381,10382	CAMK2B,MAPT,TUBB2A,TUBB3,TUBB4A
1_Member	Reactome Gene Sets	R-HSA-9609736	Assembly and cell surface presentation of NMDA receptors	-5.52507	-3.32665	4/41	816,7280,10381,10382	CAMK2B,TUBB2A,TUBB3,TUBB4A
1_Member	Reactome Gene Sets	R-HSA-442755	Activation of NMDA receptors and postsynaptic events	-5.49782	-3.31788	5/93	816,4137,7280,10381,10382	CAMK2B,MAPT,TUBB2A,TUBB3,TUBB4A
1_Member	Reactome Gene Sets	R-HSA-437239	Recycling pathway of L1	-5.28401	-3.13883	4/47	7280,10381,10382,26052	TUBB2A,TUBB3,TUBB4A,DNM3
1_Member	Reactome Gene Sets	R-HSA-3371497	HSP90 chaperone cycle for steroid hormone receptors (SHR) in the presence of ligand	-5.00884	-2.91109	4/55	3306,7280,10381,10382	HSPA2,TUBB2A,TUBB3,TUBB4A
1_Member	Reactome Gene Sets	R-HSA-190840	Microtubule-dependent trafficking of connexons from Golgi to the plasma membrane	-4.96638	-2.89759	3/18	7280,10381,10382	TUBB2A,TUBB3,TUBB4A
1_Member	Reactome Gene Sets	R-HSA-190872	Transport of connexons to the plasma membrane	-4.8925	-2.8375	3/19	7280,10381,10382	TUBB2A,TUBB3,TUBB4A
1_Member	KEGG Pathway	hsa05022	Pathways of neurodegeneration - multiple diseases	-4.70256	-2.7462	8/476	816,2861,4137,4723,7280,7384,10381,10382	CAMK2B,GPR37,MAPT,NDUFV1,TUBB2A,UQCRC1,TUBB3,TUBB4A
1_Member	Reactome Gene Sets	R-HSA-389977	Post-chaperonin tubulin folding pathway	-4.69357	-2.7462	3/22	7280,10381,10382	TUBB2A,TUBB3,TUBB4A
1_Member	Reactome Gene Sets	R-HSA-1445148	Translocation of SLC2A4 (GLUT4) to the plasma membrane	-4.54282	-2.60592	4/72	7280,7533,10381,10382	TUBB2A,YWHAH,TUBB3,TUBB4A
1_Member	Reactome Gene Sets	R-HSA-389960	Formation of tubulin folding intermediates by CCT/TriC	-4.52163	-2.59495	3/25	7280,10381,10382	TUBB2A,TUBB3,TUBB4A
1_Member	KEGG Pathway	hsa04145	Phagosome	-4.46043	-2.5535	5/152	523,718,7280,10381,10382	ATP6V1A,C3,TUBB2A,TUBB3,TUBB4A
1_Member	Reactome Gene Sets	R-HSA-389957	Prefoldin mediated transfer of substrate to CCT/TriC	-4.37027	-2.47565	3/28	7280,10381,10382	TUBB2A,TUBB3,TUBB4A
1_Member	Reactome Gene Sets	R-HSA-112315	Transmission across Chemical Synapses	-4.30037	-2.42146	6/270	816,4137,6616,7280,10381,10382	CAMK2B,MAPT,SNAP25,TUBB2A,TUBB3,TUBB4A
1_Member	KEGG Pathway	hsa05020	Prion disease	-4.27378	-2.40383	6/273	3306,4723,7280,7384,10381,10382	HSPA2,NDUFV1,TUBB2A,UQCRC1,TUBB3,TUBB4A
1_Member	Reactome Gene Sets	R-HSA-9668328	Sealing of the nuclear envelope (NE) by ESCRT-III	-4.23515	-2.39928	3/31	7280,10381,10382	TUBB2A,TUBB3,TUBB4A
1_Member	Reactome Gene Sets	R-HSA-112316	Neuronal System	-4.21272	-2.39294	7/410	816,2037,4137,6616,7280,10381,10382	CAMK2B,EPB41L2,MAPT,SNAP25,TUBB2A,TUBB3,TUBB4A
1_Member	Reactome Gene Sets	R-HSA-389958	Cooperation of Prefoldin and TriC/CCT in actin and tubulin folding	-4.19315	-2.38888	3/32	7280,10381,10382	TUBB2A,TUBB3,TUBB4A
1_Member	Reactome Gene Sets	R-HSA-5626467	RHO GTPases activate IQGAPs	-4.19315	-2.38888	3/32	7280,10381,10382	TUBB2A,TUBB3,TUBB4A
1_Member	Reactome Gene Sets	R-HSA-190861	Gap junction assembly	-4.03796	-2.25596	3/36	7280,10381,10382	TUBB2A,TUBB3,TUBB4A
1_Member	Reactome Gene Sets	R-HSA-112314	Neurotransmitter receptors and postsynaptic signal transmission	-3.84644	-2.089	5/205	816,4137,7280,10381,10382	CAMK2B,MAPT,TUBB2A,TUBB3,TUBB4A
1_Member	Reactome Gene Sets	R-HSA-8955332	Carboxyterminal post-translational modifications of tubulin	-3.83624	-2.089	3/42	7280,10381,10382	TUBB2A,TUBB3,TUBB4A
1_Member	Reactome Gene Sets	R-HSA-9646399	Aggrephagy	-3.80558	-2.07151	3/43	7280,10381,10382	TUBB2A,TUBB3,TUBB4A
1_Member	Reactome Gene Sets	R-HSA-373760	L1CAM interactions	-3.6925	-1.98114	4/119	7280,10381,10382,26052	TUBB2A,TUBB3,TUBB4A,DNM3
1_Member	Reactome Gene Sets	R-HSA-190828	Gap junction trafficking	-3.69003	-1.98114	3/47	7280,10381,10382	TUBB2A,TUBB3,TUBB4A
1_Member	Reactome Gene Sets	R-HSA-2132295	MHC class II antigen presentation	-3.6375	-1.93925	4/123	7280,10381,10382,26052	TUBB2A,TUBB3,TUBB4A,DNM3
1_Member	Reactome Gene Sets	R-HSA-157858	Gap junction trafficking and regulation	-3.63607	-1.93925	3/49	7280,10381,10382	TUBB2A,TUBB3,TUBB4A
1_Member	Reactome Gene Sets	R-HSA-6811436	COPI-independent Golgi-to-ER retrograde traffic	-3.58438	-1.90504	3/51	7280,10381,10382	TUBB2A,TUBB3,TUBB4A
1_Member	Reactome Gene Sets	R-HSA-5620924	Intraflagellar transport	-3.5107	-1.83704	3/54	7280,10381,10382	TUBB2A,TUBB3,TUBB4A
1_Member	WikiPathways	WP2272	Pathogenic Escherichia coli infection	-3.48709	-1.82457	3/55	7280,10381,10382	TUBB2A,TUBB3,TUBB4A
1_Member	KEGG Pathway	hsa05010	Alzheimer disease	-3.46925	-1.81219	6/384	4137,4723,7280,7384,10381,10382	MAPT,NDUFV1,TUBB2A,UQCRC1,TUBB3,TUBB4A
1_Member	Reactome Gene Sets	R-HSA-983189	Kinesins	-3.39698	-1.74532	3/59	7280,10381,10382	TUBB2A,TUBB3,TUBB4A
1_Member	Reactome Gene Sets	R-HSA-2995410	Nuclear Envelope (NE) Reassembly	-3.09155	-1.46083	3/75	7280,10381,10382	TUBB2A,TUBB3,TUBB4A
1_Member	Reactome Gene Sets	R-HSA-8852276	The role of GTSE1 in G2/M progression after G2 checkpoint	-3.05831	-1.43266	3/77	7280,10381,10382	TUBB2A,TUBB3,TUBB4A
1_Member	KEGG Pathway	hsa05016	Huntington disease	-3.05141	-1.43078	5/306	4723,7280,7384,10381,10382	NDUFV1,TUBB2A,UQCRC1,TUBB3,TUBB4A
1_Member	Reactome Gene Sets	R-HSA-9663891	Selective autophagy	-2.99447	-1.38857	3/81	7280,10381,10382	TUBB2A,TUBB3,TUBB4A
1_Member	Reactome Gene Sets	R-HSA-195258	RHO GTPase Effectors	-2.92335	-1.33168	5/327	1072,7280,7533,10381,10382	CFL1,TUBB2A,YWHAH,TUBB3,TUBB4A
1_Member	KEGG Pathway	hsa04540	Gap junction	-2.89043	-1.30341	3/88	7280,10381,10382	TUBB2A,TUBB3,TUBB4A
1_Member	Reactome Gene Sets	R-HSA-390466	Chaperonin-mediated protein folding	-2.84851	-1.27514	3/91	7280,10381,10382	TUBB2A,TUBB3,TUBB4A
1_Member	Reactome Gene Sets	R-HSA-380320	Recruitment of NuMA to mitotic centrosomes	-2.80804	-1.23912	3/94	7280,10381,10382	TUBB2A,TUBB3,TUBB4A
1_Member	Reactome Gene Sets	R-HSA-194315	Signaling by Rho GTPases	-2.79336	-1.22885	7/707	1072,1627,1832,7280,7533,10381,10382	CFL1,DBN1,DSP,TUBB2A,YWHAH,TUBB3,TUBB4A
1_Member	Reactome Gene Sets	R-HSA-391251	Protein folding	-2.76892	-1.20877	3/97	7280,10381,10382	TUBB2A,TUBB3,TUBB4A
1_Member	Reactome Gene Sets	R-HSA-6811434	COPI-dependent Golgi-to-ER retrograde traffic	-2.74355	-1.19201	3/99	7280,10381,10382	TUBB2A,TUBB3,TUBB4A
1_Member	Reactome Gene Sets	R-HSA-9716542	Signaling by Rho GTPases, Miro GTPases and RHOBTB3	-2.7383	-1.19099	7/723	1072,1627,1832,7280,7533,10381,10382	CFL1,DBN1,DSP,TUBB2A,YWHAH,TUBB3,TUBB4A
1_Member	KEGG Pathway	hsa05014	Amyotrophic lateral sclerosis	-2.71912	-1.17977	5/364	4723,7280,7384,10381,10382	NDUFV1,TUBB2A,UQCRC1,TUBB3,TUBB4A
1_Member	Reactome Gene Sets	R-HSA-6807878	COPI-mediated anterograde transport	-2.71873	-1.17977	3/101	7280,10381,10382	TUBB2A,TUBB3,TUBB4A
1_Member	Reactome Gene Sets	R-HSA-422475	Axon guidance	-2.65645	-1.12973	6/552	1072,6130,7280,10381,10382,26052	CFL1,RPL7A,TUBB2A,TUBB3,TUBB4A,DNM3
1_Member	Reactome Gene Sets	R-HSA-5610787	Hedgehog 'off' state	-2.58005	-1.06913	3/113	7280,10381,10382	TUBB2A,TUBB3,TUBB4A
1_Member	Reactome Gene Sets	R-HSA-9675108	Nervous system development	-2.56102	-1.05395	6/577	1072,6130,7280,10381,10382,26052	CFL1,RPL7A,TUBB2A,TUBB3,TUBB4A,DNM3
1_Member	Reactome Gene Sets	R-HSA-9648025	EML4 and NUDC in mitotic spindle formation	-2.53733	-1.04164	3/117	7280,10381,10382	TUBB2A,TUBB3,TUBB4A
1_Member	KEGG Pathway	hsa05132	Salmonella infection	-2.50072	-1.00876	4/249	7280,7295,10381,10382	TUBB2A,TXN,TUBB3,TUBB4A
1_Member	Reactome Gene Sets	R-HSA-2500257	Resolution of Sister Chromatid Cohesion	-2.4467	-0.962101	3/126	7280,10381,10382	TUBB2A,TUBB3,TUBB4A
1_Member	WikiPathways	WP5124	Alzheimer's disease	-2.41612	-0.935156	4/263	4137,7280,10381,10382	MAPT,TUBB2A,TUBB3,TUBB4A
1_Member	Reactome Gene Sets	R-HSA-8856688	Golgi-to-ER retrograde transport	-2.38094	-0.907152	3/133	7280,10381,10382	TUBB2A,TUBB3,TUBB4A
1_Member	Reactome Gene Sets	R-HSA-9609690	HCMV Early Events	-2.36284	-0.896115	3/135	7280,10381,10382	TUBB2A,TUBB3,TUBB4A
1_Member	Reactome Gene Sets	R-HSA-1632852	Macroautophagy	-2.3539	-0.890664	3/136	7280,10381,10382	TUBB2A,TUBB3,TUBB4A
1_Member	Reactome Gene Sets	R-HSA-5663220	RHO GTPases Activate Formins	-2.31884	-0.862501	3/140	7280,10381,10382	TUBB2A,TUBB3,TUBB4A
1_Member	Reactome Gene Sets	R-HSA-5358351	Signaling by Hedgehog	-2.24382	-0.790882	3/149	7280,10381,10382	TUBB2A,TUBB3,TUBB4A
1_Member	Reactome Gene Sets	R-HSA-9612973	Autophagy	-2.22782	-0.778264	3/151	7280,10381,10382	TUBB2A,TUBB3,TUBB4A
1_Member	Reactome Gene Sets	R-HSA-199977	ER to Golgi Anterograde Transport	-2.20426	-0.761382	3/154	7280,10381,10382	TUBB2A,TUBB3,TUBB4A
1_Member	Reactome Gene Sets	R-HSA-446203	Asparagine N-linked glycosylation	-2.19522	-0.755786	4/304	7280,10381,10382,10825	TUBB2A,TUBB3,TUBB4A,NEU3
1_Member	Reactome Gene Sets	R-HSA-9609646	HCMV Infection	-2.15861	-0.7288	3/160	7280,10381,10382	TUBB2A,TUBB3,TUBB4A
1_Member	Reactome Gene Sets	R-HSA-983231	Factors involved in megakaryocyte development and platelet production	-2.10061	-0.677187	3/168	7280,10381,10382	TUBB2A,TUBB3,TUBB4A
1_Member	WikiPathways	WP2059	Alzheimer's disease and miRNA effects	-2.08135	-0.661083	4/328	4137,7280,10381,10382	MAPT,TUBB2A,TUBB3,TUBB4A
2_Summary	Reactome Gene Sets	R-HSA-354194	GRB2:SOS provides linkage to MAPK signaling for Integrins	-7.37476	-4.43013	4/15	2243,2244,2266,5908,816,1072,1397,1465,6624,7086,7295,10935,718,23052,7280,10381,10382,26052,63893,51104,6130	FGA,FGB,FGG,RAP1B,CAMK2B,CFL1,CRIP2,CSRP1,FSCN1,TKT,TXN,PRDX3,C3,ENDOD1,TUBB2A,TUBB3,TUBB4A,DNM3,UBE2O,ABHD17B,RPL7A
2_Member	Reactome Gene Sets	R-HSA-354194	GRB2:SOS provides linkage to MAPK signaling for Integrins	-7.37476	-4.43013	4/15	2243,2244,2266,5908	FGA,FGB,FGG,RAP1B
2_Member	Reactome Gene Sets	R-HSA-372708	p130Cas linkage to MAPK signaling for integrins	-7.37476	-4.43013	4/15	2243,2244,2266,5908	FGA,FGB,FGG,RAP1B
2_Member	Reactome Gene Sets	R-HSA-9656223	Signaling by RAF1 mutants	-7.18937	-4.43013	5/43	816,2243,2244,2266,5908	CAMK2B,FGA,FGB,FGG,RAP1B
2_Member	WikiPathways	WP3888	VEGFA-VEGFR2 signaling pathway	-7.04176	-4.43013	10/432	1072,1397,1465,2243,2244,2266,5908,6624,7086,7295	CFL1,CRIP2,CSRP1,FGA,FGB,FGG,RAP1B,FSCN1,TKT,TXN
2_Member	Reactome Gene Sets	R-HSA-6802946	Signaling by moderate kinase activity BRAF mutants	-6.99027	-4.43013	5/47	816,2243,2244,2266,5908	CAMK2B,FGA,FGB,FGG,RAP1B
2_Member	Reactome Gene Sets	R-HSA-6802949	Signaling by RAS mutants	-6.99027	-4.43013	5/47	816,2243,2244,2266,5908	CAMK2B,FGA,FGB,FGG,RAP1B
2_Member	Reactome Gene Sets	R-HSA-6802955	Paradoxical activation of RAF signaling by kinase inactive BRAF	-6.99027	-4.43013	5/47	816,2243,2244,2266,5908	CAMK2B,FGA,FGB,FGG,RAP1B
2_Member	Reactome Gene Sets	R-HSA-9649948	Signaling downstream of RAS mutants	-6.99027	-4.43013	5/47	816,2243,2244,2266,5908	CAMK2B,FGA,FGB,FGG,RAP1B
2_Member	WikiPathways	WP4927	COVID-19, thrombosis and anticoagulation	-6.32568	-3.84472	3/7	2243,2244,2266	FGA,FGB,FGG
2_Member	Reactome Gene Sets	R-HSA-354192	Integrin signaling	-6.27515	-3.82895	4/27	2243,2244,2266,5908	FGA,FGB,FGG,RAP1B
2_Member	Reactome Gene Sets	R-HSA-6802952	Signaling by BRAF and RAF1 fusions	-6.20752	-3.7935	5/67	816,2243,2244,2266,5908	CAMK2B,FGA,FGB,FGG,RAP1B
2_Member	Reactome Gene Sets	R-HSA-6802948	Signaling by high-kinase activity BRAF mutants	-5.75643	-3.45156	4/36	2243,2244,2266,5908	FGA,FGB,FGG,RAP1B
2_Member	Reactome Gene Sets	R-HSA-6802957	Oncogenic MAPK signaling	-5.71668	-3.43529	5/84	816,2243,2244,2266,5908	CAMK2B,FGA,FGB,FGG,RAP1B
2_Member	WikiPathways	WP15	Selenium micronutrient network	-5.66597	-3.40686	5/86	2243,2244,2266,7295,10935	FGA,FGB,FGG,TXN,PRDX3
2_Member	Reactome Gene Sets	R-HSA-76009	Platelet Aggregation (Plug Formation)	-5.61382	-3.3759	4/39	2243,2244,2266,5908	FGA,FGB,FGG,RAP1B
2_Member	Reactome Gene Sets	R-HSA-5674135	MAP2K and MAPK activation	-5.56886	-3.35114	4/40	2243,2244,2266,5908	FGA,FGB,FGG,RAP1B
2_Member	WikiPathways	WP2806	Complement system	-5.40765	-3.24544	5/97	718,2243,2244,2266,7295	C3,FGA,FGB,FGG,TXN
2_Member	Reactome Gene Sets	R-HSA-5602498	MyD88 deficiency (TLR2/4)	-5.0448	-2.93181	3/17	2243,2244,2266	FGA,FGB,FGG
2_Member	Reactome Gene Sets	R-HSA-5603041	IRAK4 deficiency (TLR2/4)	-4.96638	-2.89759	3/18	2243,2244,2266	FGA,FGB,FGG
2_Member	Reactome Gene Sets	R-HSA-114608	Platelet degranulation	-4.8032	-2.76892	5/129	1072,2243,2244,2266,23052	CFL1,FGA,FGB,FGG,ENDOD1
2_Member	Reactome Gene Sets	R-HSA-1280218	Adaptive Immune System	-4.79759	-2.76892	10/769	718,2243,2244,2266,5908,7280,10381,10382,26052,63893	C3,FGA,FGB,FGG,RAP1B,TUBB2A,TUBB3,TUBB4A,DNM3,UBE2O
2_Member	Reactome Gene Sets	R-HSA-5686938	Regulation of TLR by endogenous ligand	-4.75648	-2.7462	3/21	2243,2244,2266	FGA,FGB,FGG
2_Member	Reactome Gene Sets	R-HSA-109582	Hemostasis	-4.72539	-2.7462	9/621	1072,2243,2244,2266,5908,7280,10381,10382,23052	CFL1,FGA,FGB,FGG,RAP1B,TUBB2A,TUBB3,TUBB4A,ENDOD1
2_Member	Reactome Gene Sets	R-HSA-76005	Response to elevated platelet cytosolic Ca2+	-4.7234	-2.7462	5/134	1072,2243,2244,2266,23052	CFL1,FGA,FGB,FGG,ENDOD1
2_Member	Reactome Gene Sets	R-HSA-140875	Common Pathway of Fibrin Clot Formation	-4.69357	-2.7462	3/22	2243,2244,2266	FGA,FGB,FGG
2_Member	WikiPathways	WP272	Blood clotting cascade	-4.69357	-2.7462	3/22	2243,2244,2266	FGA,FGB,FGG
2_Member	Reactome Gene Sets	R-HSA-76002	Platelet activation, signaling and aggregation	-4.36369	-2.47565	6/263	1072,2243,2244,2266,5908,23052	CFL1,FGA,FGB,FGG,RAP1B,ENDOD1
2_Member	KEGG Pathway	hsa04610	Complement and coagulation cascades	-4.25907	-2.39928	4/85	718,2243,2244,2266	C3,FGA,FGB,FGG
2_Member	Reactome Gene Sets	R-HSA-5260271	Diseases of Immune System	-4.23515	-2.39928	3/31	2243,2244,2266	FGA,FGB,FGG
2_Member	Reactome Gene Sets	R-HSA-5602358	Diseases associated with the TLR signaling cascade	-4.23515	-2.39928	3/31	2243,2244,2266	FGA,FGB,FGG
2_Member	Reactome Gene Sets	R-HSA-5673001	RAF/MAP kinase cascade	-4.21298	-2.39294	6/280	816,2243,2244,2266,5908,51104	CAMK2B,FGA,FGB,FGG,RAP1B,ABHD17B
2_Member	Reactome Gene Sets	R-HSA-5684996	MAPK1/MAPK3 signaling	-4.16218	-2.36546	6/286	816,2243,2244,2266,5908,51104	CAMK2B,FGA,FGB,FGG,RAP1B,ABHD17B
2_Member	Reactome Gene Sets	R-HSA-140877	Formation of Fibrin Clot (Clotting Cascade)	-3.93302	-2.1582	3/39	2243,2244,2266	FGA,FGB,FGG
2_Member	Reactome Gene Sets	R-HSA-5683057	MAPK family signaling cascades	-3.85846	-2.0907	6/325	816,2243,2244,2266,5908,51104	CAMK2B,FGA,FGB,FGG,RAP1B,ABHD17B
2_Member	WikiPathways	WP4136	Fibrin complement receptor 3 signaling pathway	-3.80558	-2.07151	3/43	2243,2244,2266	FGA,FGB,FGG
2_Member	KEGG Pathway	hsa04611	Platelet activation	-3.62405	-1.93314	4/124	2243,2244,2266,5908	FGA,FGB,FGG,RAP1B
2_Member	KEGG Pathway	hsa05171	Coronavirus disease - COVID-19	-3.59719	-1.9121	5/232	718,2243,2244,2266,6130	C3,FGA,FGB,FGG,RPL7A
2_Member	Reactome Gene Sets	R-HSA-166016	Toll Like Receptor 4 (TLR4) Cascade	-3.35449	-1.70816	4/146	2243,2244,2266,26052	FGA,FGB,FGG,DNM3
2_Member	WikiPathways	WP176	Folate metabolism	-3.19722	-1.55616	3/69	2243,2244,2266	FGA,FGB,FGG
2_Member	Reactome Gene Sets	R-HSA-168898	Toll-like Receptor Cascades	-3.12565	-1.48979	4/168	2243,2244,2266,26052	FGA,FGB,FGG,DNM3
2_Member	Reactome Gene Sets	R-HSA-216083	Integrin cell surface interactions	-2.9339	-1.3328	3/85	2243,2244,2266	FGA,FGB,FGG
2_Member	KEGG Pathway	hsa04613	Neutrophil extracellular trap formation	-2.9274	-1.33168	4/190	718,2243,2244,2266	C3,FGA,FGB,FGG
2_Member	Reactome Gene Sets	R-HSA-1236974	ER-Phagosome pathway	-2.86232	-1.2799	3/90	2243,2244,2266	FGA,FGB,FGG
2_Member	Reactome Gene Sets	R-HSA-1236975	Antigen processing-Cross presentation	-2.67062	-1.13578	3/105	2243,2244,2266	FGA,FGB,FGG
2_Member	Reactome Gene Sets	R-HSA-8957275	Post-translational protein phosphorylation	-2.63582	-1.1131	3/108	718,2243,2266	C3,FGA,FGG
2_Member	Reactome Gene Sets	R-HSA-166058	MyD88:MAL(TIRAP) cascade initiated on plasma membrane	-2.58005	-1.06913	3/113	2243,2244,2266	FGA,FGB,FGG
2_Member	Reactome Gene Sets	R-HSA-168188	Toll Like Receptor TLR6:TLR2 Cascade	-2.58005	-1.06913	3/113	2243,2244,2266	FGA,FGB,FGG
2_Member	Reactome Gene Sets	R-HSA-168179	Toll Like Receptor TLR1:TLR2 Cascade	-2.54786	-1.04841	3/116	2243,2244,2266	FGA,FGB,FGG
2_Member	Reactome Gene Sets	R-HSA-181438	Toll Like Receptor 2 (TLR2) Cascade	-2.54786	-1.04841	3/116	2243,2244,2266	FGA,FGB,FGG
2_Member	Reactome Gene Sets	R-HSA-381426	Regulation of Insulin-like Growth Factor (IGF) transport and uptake by Insulin-like Growth Factor Binding Proteins (IGFBPs)	-2.45642	-0.968154	3/125	718,2243,2266	C3,FGA,FGG
2_Member	Reactome Gene Sets	R-HSA-5663202	Diseases of signal transduction by growth factor receptors and second messengers	-2.39594	-0.918577	5/433	816,2243,2244,2266,5908	CAMK2B,FGA,FGB,FGG,RAP1B
3_Summary	Reactome Gene Sets	R-HSA-8953897	Cellular responses to stimuli	-7.24956	-4.43013	13/798	523,816,1465,1968,3306,6130,7086,7280,7295,8570,10381,10382,10935	ATP6V1A,CAMK2B,CSRP1,EIF2S3,HSPA2,RPL7A,TKT,TUBB2A,TXN,KHSRP,TUBB3,TUBB4A,PRDX3
3_Member	Reactome Gene Sets	R-HSA-8953897	Cellular responses to stimuli	-7.24956	-4.43013	13/798	523,816,1465,1968,3306,6130,7086,7280,7295,8570,10381,10382,10935	ATP6V1A,CAMK2B,CSRP1,EIF2S3,HSPA2,RPL7A,TKT,TUBB2A,TXN,KHSRP,TUBB3,TUBB4A,PRDX3
3_Member	Reactome Gene Sets	R-HSA-2262752	Cellular responses to stress	-6.42542	-3.90666	12/784	523,816,1968,3306,6130,7086,7280,7295,8570,10381,10382,10935	ATP6V1A,CAMK2B,EIF2S3,HSPA2,RPL7A,TKT,TUBB2A,TXN,KHSRP,TUBB3,TUBB4A,PRDX3
3_Member	Reactome Gene Sets	R-HSA-9711097	Cellular response to starvation	-2.18883	-0.755786	3/156	523,1968,6130	ATP6V1A,EIF2S3,RPL7A
4_Summary	KEGG Pathway	hsa01200	Carbon metabolism	-5.04546	-2.93181	5/115	1431,2805,5211,7086,8803,7453	CS,GOT1,PFKL,TKT,SUCLA2,WARS1
4_Member	KEGG Pathway	hsa01200	Carbon metabolism	-5.04546	-2.93181	5/115	1431,2805,5211,7086,8803	CS,GOT1,PFKL,TKT,SUCLA2
4_Member	KEGG Pathway	hsa01230	Biosynthesis of amino acids	-4.47279	-2.55609	4/75	1431,2805,5211,7086	CS,GOT1,PFKL,TKT
4_Member	WikiPathways	WP5220	Metabolic reprogramming in pancreatic cancer	-3.83624	-2.089	3/42	1431,2805,5211	CS,GOT1,PFKL
4_Member	WikiPathways	WP3925	Amino acid metabolism	-2.84851	-1.27514	3/91	1431,2805,7453	CS,GOT1,WARS1
5_Summary	Reactome Gene Sets	R-HSA-1428517	The citric acid (TCA) cycle and respiratory electron transport	-4.13444	-2.34515	5/178	1431,4723,7384,8803,79944	CS,NDUFV1,UQCRC1,SUCLA2,L2HGDH
5_Member	Reactome Gene Sets	R-HSA-1428517	The citric acid (TCA) cycle and respiratory electron transport	-4.13444	-2.34515	5/178	1431,4723,7384,8803,79944	CS,NDUFV1,UQCRC1,SUCLA2,L2HGDH
5_Member	Reactome Gene Sets	R-HSA-71406	Pyruvate metabolism and Citric Acid (TCA) cycle	-3.48709	-1.82457	3/55	1431,8803,79944	CS,SUCLA2,L2HGDH
6_Summary	Reactome Gene Sets	R-HSA-5357801	Programmed Cell Death	-3.79766	-2.07002	5/210	1832,4137,4976,7533,8473	DSP,MAPT,OPA1,YWHAH,OGT
6_Member	Reactome Gene Sets	R-HSA-5357801	Programmed Cell Death	-3.79766	-2.07002	5/210	1832,4137,4976,7533,8473	DSP,MAPT,OPA1,YWHAH,OGT
6_Member	Reactome Gene Sets	R-HSA-109581	Apoptosis	-3.01421	-1.40346	4/180	1832,4137,4976,7533	DSP,MAPT,OPA1,YWHAH
7_Summary	Reactome Gene Sets	R-HSA-6798695	Neutrophil degranulation	-3.77734	-2.05605	7/482	718,1832,3615,5211,5908,6616,25840	C3,DSP,IMPDH2,PFKL,RAP1B,SNAP25,METTL7A
7_Member	Reactome Gene Sets	R-HSA-6798695	Neutrophil degranulation	-3.77734	-2.05605	7/482	718,1832,3615,5211,5908,6616,25840	C3,DSP,IMPDH2,PFKL,RAP1B,SNAP25,METTL7A
8_Summary	KEGG Pathway	hsa04721	Synaptic vesicle cycle	-3.04202	-1.42636	3/78	523,6616,26052	ATP6V1A,SNAP25,DNM3
8_Member	KEGG Pathway	hsa04721	Synaptic vesicle cycle	-3.04202	-1.42636	3/78	523,6616,26052	ATP6V1A,SNAP25,DNM3
9_Summary	Reactome Gene Sets	R-HSA-15869	Metabolism of nucleotides	-2.74355	-1.19201	3/99	3251,3615,7295	HPRT1,IMPDH2,TXN
9_Member	Reactome Gene Sets	R-HSA-15869	Metabolism of nucleotides	-2.74355	-1.19201	3/99	3251,3615,7295	HPRT1,IMPDH2,TXN
10_Summary	WikiPathways	WP4932	7q11.23 copy number variation syndrome	-2.6589	-1.12973	3/106	1072,3306,6616	CFL1,HSPA2,SNAP25
10_Member	WikiPathways	WP4932	7q11.23 copy number variation syndrome	-2.6589	-1.12973	3/106	1072,3306,6616	CFL1,HSPA2,SNAP25
11_Summary	KEGG Pathway	hsa00190	Oxidative phosphorylation	-2.37185	-0.901612	3/134	523,4723,7384	ATP6V1A,NDUFV1,UQCRC1
11_Member	KEGG Pathway	hsa00190	Oxidative phosphorylation	-2.37185	-0.901612	3/134	523,4723,7384	ATP6V1A,NDUFV1,UQCRC1
12_Summary	WikiPathways	WP5083	Neuroinflammation and glutamatergic signaling	-2.31884	-0.862501	3/140	816,1072,2805	CAMK2B,CFL1,GOT1
12_Member	WikiPathways	WP5083	Neuroinflammation and glutamatergic signaling	-2.31884	-0.862501	3/140	816,1072,2805	CAMK2B,CFL1,GOT1
13_Summary	WikiPathways	WP536	Calcium regulation in cardiac cells	-2.21991	-0.773707	3/152	816,7533,26575,718,2861	CAMK2B,YWHAH,RGS17,C3,GPR37
13_Member	WikiPathways	WP536	Calcium regulation in cardiac cells	-2.21991	-0.773707	3/152	816,7533,26575	CAMK2B,YWHAH,RGS17
13_Member	WikiPathways	WP289	Myometrial relaxation and contraction pathways	-2.18883	-0.755786	3/156	816,7533,26575	CAMK2B,YWHAH,RGS17
13_Member	Reactome Gene Sets	R-HSA-418594	G alpha (i) signalling events	-2.12757	-0.700967	4/318	718,816,2861,26575	C3,CAMK2B,GPR37,RGS17
