# Supplementary material for: Altered Cortical Palmitoylation Induces Widespread Molecular Disturbances in Parkinson’s Disease
Source: Int J Mol Sci. 2022 Nov 14;23(22):14018. doi: 10.3390/ijms232214018 (PMC9696982; doi:10.3390/ijms232214018)
Supplement: Supplementary file 1 [file ijms-23-14018-s001.zip › Supplementary Table S6.xlsx]

## Sheet: Qual
	Supplementary Table S6. List of 66 proteins with qualitative differences in palmitoylation in cortex of PD patients and controls
Accesion Uniprot	Gene Symbol	Protein Name
Q53GA9	TSPAN1	Tetraspanin
Q969E2	SCAMP4	Secretory carrier-associated membrane protein 4
Q16563	SYPL1	Synaptophysin-like protein 1
B7Z6P1	ACTA1	cDNA FLJ53662, highly similar to Actin, alpha skeletal muscle
Q6GPG7	LPAR1	Lysophosphatidic acid receptor 1
Q76LA1	CSTB	Cystatin-B, CPI-B, Liver thiol proteinase inhibitor, Stefin-B
Q9UM22	EPDR1	Mammalian ependymin-related protein 1
Q6MZT1	RGS7BP	Regulator of G-protein signaling 7-binding protein
A0A024RDP0	UBL3	Ubiquitin-like protein
Q0D2M2	HIST1H2BC	HIST1H2BC protein
Q6PCB6	ABHD17C	Alpha/beta hydrolase domain-containing protein 17C
P01040	CSTA	Cystatin-A
A0A024RBB5	CSRP2	Cysteine and glycine-rich protein 2, isoform CRA_a, Epididymis secretory sperm binding protein
P55060	CSE1L	Exportin-2
B7Z317	TSPAN5	Tetraspanin
Q53H37		Calmodulin-like skin protein variant
Q9NZL9	MAT2B	Methionine adenosyltransferase 2 subunit beta
B4DHR1	CALR	cDNA FLJ53009, highly similar to Calreticulin
F6T1Q0	PDE12	2',5'-phosphodiesterase 12
Q9H1R2	DUSP15	Dual specificity protein phosphatase 15
Q59H46		Integrin beta
B4DRN8	ZDHHC20	Palmitoyltransferase
Q53FC7		Heat shock 70kDa protein 6 (HSP70B') variant
Q86X55	CARM1	Histone-arginine methyltransferase CARM1
A0A0G2JRN3	SERPINA1	Alpha-1-antitrypsin I
Q0EFC6	HSR1	HSR1 protein
A0A024QZX3	SERPINB6	Serpin peptidase inhibitor, clade B (Ovalbumin), member 6, isoform CRA_a
Q9BS26	ERP44	Endoplasmic reticulum resident protein 44
E9PKH6	NDUFS8	NADH dehydrogenase [ubiquinone] iron-sulfur protein 8, mitochondrial
A0A024RBA9	RAB21	Ras-related protein Rab-21
B2R6A3		Na(+)/H(+) exchange regulatory cofactor NHE-RF
B4DFE6		cDNA FLJ59861, highly similar to ATP synthase gamma chain, mitochondrial
Q6E0B2		Non-specific serine/threonine protein kinase
B3KVN0	SLC2A1	Solute carrier family 2, facilitated glucose transporter member 1
J3KS22		L-xylulose reductase
Q5CZB5		Uncharacterized protein DKFZp686M0430
H3BN78	SYT17	Synaptotagmin-17
A0A1B0GVW3	GABRB3	Gamma-aminobutyric acid receptor subunit beta-3
Q15111	PLCL1	Inactive phospholipase C-like protein 1
Q4QQP8	PTGFRN	PTGFRN protein
E9LUH3	MECP2	Methyl-CpG-binding protein 2
P40763	STAT3	Signal transducer and activator of transcription 3
P09471	GNAO1	Guanine nucleotide-binding protein G(o) subunit alpha
Q6PI78	TMEM65	Transmembrane protein 65
Q02413	DSG1	Desmoglein-1
Q59FA3	LIMK1	LIM domain kinase 1 isoform 1 variant
Q14315	FLNC	Filamin-C
Q8WY54	PPM1E	Protein phosphatase 1E
Q9UKG1	APPL1	DCC-interacting protein 13-alpha
B4E0S6		RNA helicase
A0A024R0Y2	hCG_30204	Acetyl-CoA carboxylase 1
Q96HI4	NMT1	Glycylpeptide N-tetradecanoyltransferase
Q9UQD0	SCN8A	Sodium channel protein type 8 subunit alpha
B3KTH0	CACNG3	cDNA FLJ38234 fis, clone FCBBF2005245, highly similar to Voltage-dependent calcium channel gamma-3 subunit
Q0VGA5	SARS	Serine--tRNA ligase
B3KMV5	ESYT1	cDNA FLJ12728 fis, clone NT2RP2000040, highly similar to Protein FAM62A
A0A024R6N2	CDC42BPB	Non-specific serine/threonine protein kinase
Q658K0	DKFZp564P2364	Vacuolar protein sorting-associated protein 11 homolog
A0A024R7L5	UPF1	UPF1, UPF1 regulator of nonsense transcripts homolog (Yeast), isoform CRA_b
E5KNY5	LRPPRC	Leucine-rich PPR-motif containing, Mitochondrial leucine-rich PPR motif-containing protein
Q9HCD6	TANC2	Protein TANC2
Q15746	MYLK	Myosin light chain kinase, smooth muscle
A0A0D9SFB3	DDX3X	RNA helicase
Q9BYB0	SHANK3	SH3 and multiple ankyrin repeat domains protein 3
G3XAJ6	RFTN1	Raft-linking protein, isoform CRA_c, Raftlin
Q643R3	LPCAT4	Lysophospholipid acyltransferase LPCAT4
