# Supplementary material for: Altered Cortical Palmitoylation Induces Widespread Molecular Disturbances in Parkinson’s Disease
Source: Int J Mol Sci. 2022 Nov 14;23(22):14018. doi: 10.3390/ijms232214018 (PMC9696982; doi:10.3390/ijms232214018)
Supplement: Supplementary file 1 [file ijms-23-14018-s001.zip › Supplementary Table S7.pdf]

## Overlap of differential palmitoylated proteins (DPPs) with PD-related proteins' interactomes

| DPPs matching <i>SNCA</i> , <i>LRRK2</i> and <i>DJ-1</i> interactomes | DPPs matching <i>GBA</i> , <i>UCHL1</i> and <i>PINK1</i> interactomes | DPPs matching <i>SNCA</i> , <i>LRRK2</i> , <i>DJ-1</i> , <i>GBA</i> , <i>UCHL1</i> , and <i>PINK1</i> interactomes |
|-----------------------------------------------------------------------|-----------------------------------------------------------------------|--------------------------------------------------------------------------------------------------------------------|
| <b>DPPs / <i>SNCA</i></b>                                             | <b>DPPs / <i>GBA</i></b>                                              | <b>DPPs / <i>LRRK2</i></b>                                                                                         |
| DSP                                                                   | OGT                                                                   | YWHAH                                                                                                              |
| <b>DPPs / <i>LRRK2</i></b>                                            | <b>Shared</b>                                                         | <b>DPPs / <i>GBA</i></b>                                                                                           |
| OPA1                                                                  | FGG                                                                   | OGT                                                                                                                |
| YWHAH                                                                 | FGB                                                                   | <b>DPPs / <i>SNCA</i> / <i>LRRK2</i></b>                                                                           |
| <b>DPPs / <i>DJ-1</i></b>                                             | DHX9                                                                  | HPRT1                                                                                                              |
| IMPDH2                                                                | C3                                                                    | MAPT                                                                                                               |
| TXN                                                                   | HSPA2                                                                 | <b>DPPs / <i>SNCA</i> / <i>LRRK2</i> / <i>DJ-1</i></b>                                                             |
| <b>DPPs / <i>SNCA</i> / <i>LRRK2</i></b>                              | TT                                                                    | PDRX3                                                                                                              |
| HPRT1                                                                 | UBE2O                                                                 | <b>DPPs / <i>GBA</i> / <i>UCHL1</i> / <i>PINK1</i></b>                                                             |
| MAPT                                                                  | IMPDH2                                                                | FGG                                                                                                                |
| <b>DPPs / <i>LRRK2</i> / <i>DJ-1</i></b>                              | OPA1                                                                  | FGB                                                                                                                |
| TKT                                                                   | DDX17                                                                 | DHX9                                                                                                               |
| CFL1                                                                  | PCYOX1                                                                | C3                                                                                                                 |
| DBN1                                                                  | CFL1                                                                  | HSPA2                                                                                                              |
| <b>Shared</b>                                                         | KHSRP                                                                 | UBE2O                                                                                                              |
| PRDX3                                                                 | DSP                                                                   | DDX17                                                                                                              |
|                                                                       | DBN1                                                                  | PCYOX1                                                                                                             |
|                                                                       | TXN                                                                   | KHSRP                                                                                                              |
|                                                                       | ATP6V1A                                                               | ATP6V1A                                                                                                            |
|                                                                       |                                                                       | <b>DPPs / <i>SNCA</i> / <i>GBA</i> / <i>UCHL1</i> / <i>PINK1</i></b>                                               |
|                                                                       |                                                                       | DSP                                                                                                                |
|                                                                       |                                                                       | <b>DPPs / <i>LRRK2</i> / <i>GBA</i> / <i>UCHL1</i> / <i>PINK1</i></b>                                              |
|                                                                       |                                                                       | OPA1                                                                                                               |
|                                                                       |                                                                       | <b>DPPs / <i>DJ-1</i> / <i>GBA</i> / <i>UCHL1</i> / <i>PINK1</i></b>                                               |
|                                                                       |                                                                       | IMPDH2                                                                                                             |
|                                                                       |                                                                       | TXN                                                                                                                |
|                                                                       |                                                                       | <b>DPPs / <i>LRRK2</i> / <i>DJ-1</i> / <i>GBA</i> / <i>UCHL1</i> / <i>PINK1</i></b>                                |
|                                                                       |                                                                       | TKT                                                                                                                |
|                                                                       |                                                                       | CFL1                                                                                                               |
|                                                                       |                                                                       | DBN1                                                                                                               |

**Supplementary Table S7.** Differential palmitoylated proteins (DPPs) in cerebral cortex from Parkinson' disease patients that interact with proteins encoded by relevant PARK genes (*SNCA*, *LRRK2*, *DJ-1*, *GBA*, *UCHL1*, and *PINK1*).
