# Supplementary material for: Altered Cortical Palmitoylation Induces Widespread Molecular Disturbances in Parkinson’s Disease
Source: Int J Mol Sci. 2022 Nov 14;23(22):14018. doi: 10.3390/ijms232214018 (PMC9696982; doi:10.3390/ijms232214018)
Supplement: Supplementary file 1 [file ijms-23-14018-s001.zip › Supplementaty Table S8.pdf]

| Predicted cellular location of differential and qualitative proteins with altered palmitoylation in cerebral cortex from Parkinson's disease patients |                |                         |                  |                    |                                           |                |                         |                  |                    |
|-------------------------------------------------------------------------------------------------------------------------------------------------------|----------------|-------------------------|------------------|--------------------|-------------------------------------------|----------------|-------------------------|------------------|--------------------|
| Differential palmitoylated proteins (DPPs)                                                                                                            |                |                         |                  |                    | Qualitative palmitoylated proteins (QPPs) |                |                         |                  |                    |
| <i>Astrocytes</i>                                                                                                                                     | <i>Neurons</i> | <i>Oligodendrocytes</i> | <i>Microglia</i> | <i>Endothelium</i> | <i>Astrocytes</i>                         | <i>Neurons</i> | <i>Oligodendrocytes</i> | <i>Microglia</i> | <i>Endothelium</i> |
| L2HGDH                                                                                                                                                | UBE2O          | DNM3                    | C3               | PLP2               | FLNC                                      | RGS7BP         | DUSP15                  | DCXR             | CSRP2              |
| FGA                                                                                                                                                   | TUBB3          | ENDOD1                  | FSCN1            | CRIP2              | CSRP2                                     | SYT17          | PPM1E                   | NMT1             | TSPAN5             |
| CSRP1                                                                                                                                                 | PDXP           | TUBB4A                  | PTGDS            | RAP1B              | GNAO1                                     | MECP2          | HISTH2BC                | CSTB             | ZDHHC20            |
| HSPA2                                                                                                                                                 | TUBB2A         | MAPT                    | PIP4K2A          |                    |                                           | PPM1E          | RFTN1                   | EPDR1            | PTGFRN             |
| NEBL                                                                                                                                                  | FXYD7          | ANKS1B                  | HPRT1            |                    |                                           | TANC2          |                         | RFTN1            | MYLK               |
| CASKIN1                                                                                                                                               | RGS17          | CSRP1                   | RAP1B            |                    |                                           | LPCAT4         |                         |                  |                    |
|                                                                                                                                                       | DSP            | GPR37                   |                  |                    |                                           |                |                         |                  |                    |
|                                                                                                                                                       | DBN1           | IGSF8                   |                  |                    |                                           |                |                         |                  |                    |
|                                                                                                                                                       | CAMK2B         |                         |                  |                    |                                           |                |                         |                  |                    |
|                                                                                                                                                       | MAPT           |                         |                  |                    |                                           |                |                         |                  |                    |
|                                                                                                                                                       | SNAP25         |                         |                  |                    |                                           |                |                         |                  |                    |
|                                                                                                                                                       | C3             |                         |                  |                    |                                           |                |                         |                  |                    |
|                                                                                                                                                       | IGSF8          |                         |                  |                    |                                           |                |                         |                  |                    |
|                                                                                                                                                       | OGT            |                         |                  |                    |                                           |                |                         |                  |                    |

**Supplementary Table S8.** Predicted cellular location of differential and qualitative proteins with altered palmitoylation in cerebral cortex from Parkinson's disease patients.
